# Supplementary material for: The Antibody Dependant Neurite Outgrowth Modulation Response Involvement in Spinal Cord Injury
Source: Frontiers journal article supplement (doi:10.3389/fimmu.2022.882830), 2022-06-16
Supplement: Presentation_3.pdf [file Presentation_3.pdf]

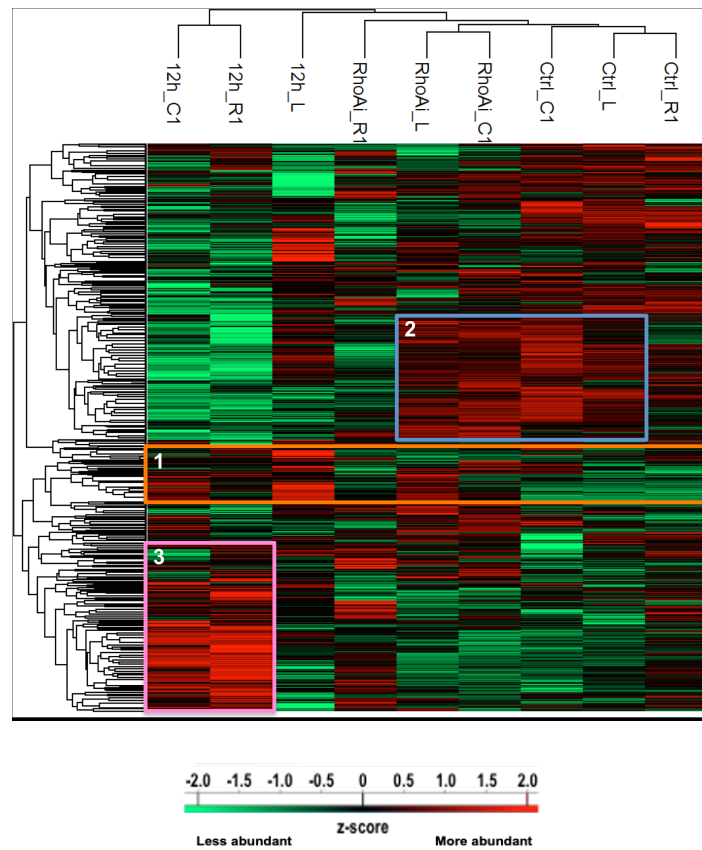

**Supp. Figure 3:** Heatmap illustrating hierarchical clustering obtained after analysis of digested peptides isolated from rostral, caudal and lesion segments collected 12 h after lesion and treatment or not with RhoA inhibitor. Cluster 1 corresponds to the inflammatory proteins and immunoglobulins. Cluster 2 contains proteins involved in synaptogenesis and Cluster 3, proteins involved in neurite outgrowth.
