# Supplementary material for: The Antibody Dependant Neurite Outgrowth Modulation Response Involvement in Spinal Cord Injury
Source: Front Immunol. 2022 Jun 16;13:882830. doi: 10.3389/fimmu.2022.882830 (PMC9245426; doi:10.3389/fimmu.2022.882830)
Supplement: Supplementary file 11 [file DataSheet_5.xlsx]

## Sheet: RefProt-Mélodie-ListProtein-SCI
Ctrl_R1	Ctrl_L	Ctrl_C1	12h_R1	12h_L	12h_C1	RhoAi_R1	RhoAi_L	RhoAi_C1	C: ANOVA Significant	N: Peptides	N: Razor + unique peptides	N: Unique peptides	N: Sequence coverage [%]	N: Unique + razor sequence coverage [%]	N: Unique sequence coverage [%]	N: Mol. weight [kDa]	N: Q-value	N: Score	N: Intensity	N: MS/MS count	N: Sequence length	N: Average molecular mass	N: Number of theoretical peptides (trypsin/P, 7-30)	N: -Log ANOVA p value	T: Protein IDs	T: Majority protein IDs	T: Protein names	T: Gene names	T: Gene name	T: Protein name
0.0897055	0.473591	1.47436	-1.28811	0.477481	-1.68622	-0.566807	0.601797	0.424204		11	11	11	NaN	NaN	NaN	NaN	0	NaN	5778000000	129	396	44535.3	26	0	A0JPJ7	A0JPJ7	Obg-like ATPase 1	Ola1	Ola1	Obg-like ATPase 1
0.301265	-0.641347	-1.82214	0.933032	NaN	0.689773	1.22522	-0.560907	-0.124901		4	4	4	NaN	NaN	NaN	NaN	0	NaN	1517200000	53	259	29187.5	14	0	A0JPM9	A0JPM9	Eukaryotic translation initiation factor 3 subunit J	Eif3j	Eif3j	Eukaryotic translation initiation factor 3 subunit J
-0.847454	0.299392	-0.962774	NaN	NaN	-0.9461	-0.00236743	1.64562	0.813685		4	4	4	NaN	NaN	NaN	NaN	0	NaN	266470000	17	393	44874.6	18	0	A0JPQ9	A0JPQ9	Chitinase domain-containing protein 1	Chid1	Chid1	Chitinase domain-containing protein 1
NaN	-0.966832	-0.145707	0.489473	NaN	NaN	1.74818	-0.802732	-0.322378		4	4	4	NaN	NaN	NaN	NaN	0	NaN	241090000	4	388	41028.7	19	0	A1A5P0	A1A5P0	Cdc42 effector protein 1	Cdc42ep1	Cdc42ep1	Cdc42 effector protein 1
-0.0804413	0.260385	-0.290597	0.397748	-1.85243	1.4903	1.10444	-0.889507	-0.139892		6	6	6	NaN	NaN	NaN	NaN	0	NaN	2383000000	57	153	17010.3	9	0	A1L108	A1L108	Actin-related protein 2/3 complex subunit 5-like protein	Arpc5l	Arpc5l	Actin-related protein 2/3 complex subunit 5-like protein
NaN	-1.04825	NaN	NaN	NaN	0.943504	NaN	NaN	0.104747		2	2	2	NaN	NaN	NaN	NaN	NaN	NaN	3578000000	4	528	59515.4	29	0	A2RRU3	A2RRU3	U3 small nucleolar RNA-associated protein 15 homolog	Utp15	Utp15	U3 small nucleolar RNA-associated protein 15 homolog
-0.303896	0.319089	1.2408	-2.15622	0.8638	0.38118	-0.684501	0.485511	-0.145756		6	6	6	NaN	NaN	NaN	NaN	0	NaN	2628700000	76	274	30314.8	12	0	A2RUW1	A2RUW1	Toll-interacting protein	Tollip	Tollip	Toll-interacting protein
0.193144	-0.628383	-0.881965	1.24519	NaN	1.18077	0.859519	-1.27519	-0.693085		11	11	11	NaN	NaN	NaN	NaN	0	NaN	1485000000	75	722	80275.5	33	0	A2VD12	A2VD12	Pre-B-cell leukemia transcription factor-interacting protein 1	Pbxip1	Pbxip1	Pre-B-cell leukemia transcription factor-interacting protein 1
-0.76229	0.86051	1.89119	-0.409933	NaN	-0.338165	-0.541577	-1.15028	0.450545		4	4	3	15	15	NaN	NaN	0	NaN	416920000	25	354	40666.5	20	0	A6JFQ6	A6JFQ6	Clavesin-1	Clvs1	Clvs1	Clavesin-1
NaN	0.707107	NaN	NaN	NaN	NaN	-0.707107	NaN	NaN		3	2	2	NaN	NaN	NaN	NaN	0	NaN	110640000	3	327	37916.4	17	0	A6JUQ6	A6JUQ6	Clavesin-2	Clvs2	Clvs2	Clavesin-2
-0.31126	-0.554732	-0.403065	1.71309	-1.72978	1.19781	0.00815009	-0.144606	0.224387		12	12	12	NaN	NaN	NaN	NaN	0	NaN	6393800000	162	353	37477.7	20	0	A7VJC2	A7VJC2	Heterogeneous nuclear ribonucleoproteins A2/B1	Hnrnpa2b1	Hnrnpa2b1	Heterogeneous nuclear ribonucleoproteins A2/B1
0.0453728	0.384319	1.34971	-2.2328	-0.0732569	-0.601884	-0.00363516	0.434604	0.697571		8	8	8	NaN	NaN	NaN	NaN	0	NaN	2029100000	86	266	29844.2	14	0	A8WCF8	A8WCF8	Tumor protein p63-regulated gene 1-like protein	Tprg1l	Tprg1l	Tumor protein p63-regulated gene 1-like protein
-0.0594047	0.625414	-1.97794	NaN	NaN	NaN	0.549303	0.529486	0.333144		2	2	2	NaN	NaN	NaN	NaN	0	NaN	316570000	14	288	31344.5	14	0	A9CMA6	A9CMA6	Transmembrane protein 163	Tmem163	Tmem163	Transmembrane protein 163
-1.4481	-1.18034	-0.821716	0.622292	1.00976	1.18689	-0.345893	0.947901	0.0292016		2	2	1	NaN	NaN	NaN	NaN	0	NaN	5835200000	37	130	14112.5	5	0	A9UMV8;Q64598;Q4FZT6;Q00728;P0CC09;P0C170;P0C169;P02262	A9UMV8;Q64598;Q4FZT6;Q00728;P0CC09;P0C170;P0C169;P02262	Histone H2A.J;Histone H2A type 1-F;Histone H2A type 3;Histone H2A type 4;Histone H2A type 2-A;Histone H2A type 1-E;Histone H2A type 1-C;Histone H2A type 1	H2afj;Hist2h2aa3	H2afj;Hist2h2aa3	Histone H2A.J;Histone H2A type 1-F;Histone H2A type 3;Histone H2A type 4;Histone H2A type 2-A;Histone H2A type 1-E;Histone H2A type 1-C;Histone H2A type 1
NaN	NaN	NaN	-0.373646	NaN	-0.759375	1.13302	NaN	NaN		2	2	2	NaN	NaN	NaN	NaN	0	NaN	447140000	12	154	16579.7	10	0	B0BN18	B0BN18	Prefoldin subunit 2	Pfdn2	Pfdn2	Prefoldin subunit 2
0.469065	-0.459079	-1.92209	1.48347	-0.163939	1.20424	0.00836105	-0.3587	-0.261336		4	4	4	NaN	NaN	NaN	NaN	0	NaN	956060000	35	336	38090.9	21	0	B0BN85	B0BN85	Suppressor of G2 allele of SKP1 homolog	Sugt1	Sugt1	Protein SGT1 homolog
NaN	-0.233902	0.500803	NaN	-1.20271	NaN	-1.08683	1.11441	0.908227		4	4	4	NaN	NaN	NaN	NaN	0	NaN	733270000	18	190	21341.6	8	0	B0BN86	B0BN86	Transmembrane protein 11, mitochondrial	Tmem11	Tmem11	Transmembrane protein 11, mitochondrial
1.21748	0.0581198	0.270696	-0.442668	-0.766619	-1.44233	-1.07951	0.980499	1.20433		14	14	14	NaN	NaN	NaN	NaN	0	NaN	7263800000	175	376	42817.3	26	0	B0BN93	B0BN93	26S proteasome non-ATPase regulatory subunit 13	Psmd13	Psmd13	26S proteasome non-ATPase regulatory subunit 13
1.19029	0.149007	-0.00820576	1.77369	-1.31592	0.358752	-0.799328	-0.732222	-0.616065		4	4	4	NaN	NaN	NaN	NaN	0	NaN	3872400000	82	142	15931.9	9	0	B0BNA5	B0BNA5	Coactosin-like protein	Cotl1	Cotl1	Coactosin-like protein
0.134726	0.0182984	-1.26794	NaN	NaN	NaN	1.22181	0.91488	-1.02178		4	4	4	20	20	20	NaN	0	NaN	497350000	21	325	36460.8	19	0	B0BNA7	B0BNA7	Eukaryotic translation initiation factor 3 subunit I	Eif3i	Eif3i	Eukaryotic translation initiation factor 3 subunit I
1.86233	-0.944648	-0.93447	0.518765	-0.390657	-0.603375	1.27458	-0.233747	-0.548778		16	16	16	48	48	48	NaN	0	NaN	67238000000	605	440	50701.3	25	0	B0BND0	B0BND0	Ectonucleotide pyrophosphatase/phosphodiesterase family member 6	Enpp6	Enpp6	Ectonucleotide pyrophosphatase/phosphodiesterase family member 6
-0.552073	0.761362	1.4815	0.0465889	0.921903	-0.725388	-1.86712	0.131033	-0.197801		9	9	9	NaN	NaN	NaN	NaN	0	NaN	6072300000	98	282	31363.7	14	0	B0BNE5	B0BNE5	S-formylglutathione hydrolase	Esd	Esd	S-formylglutathione hydrolase
0.883547	-0.222011	-0.35693	-0.0555526	1.07323	0.0395696	1.35088	-1.79332	-0.919405		17	17	15	NaN	NaN	NaN	NaN	0	NaN	48520000000	585	442	51252.1	20	0	B0BNF1	B0BNF1	Septin-8	2008-09-01	2008-09-01	Septin-8
NaN	NaN	NaN	NaN	NaN	NaN	-0.707107	0.707107	NaN		3	3	3	NaN	NaN	NaN	NaN	0	NaN	255240000	7	297	34869.6	14	0	B0BNG0	B0BNG0	ER membrane protein complex subunit 2	Emc2	Emc2	ER membrane protein complex subunit 2
0.213774	1.74994	1.40639	-0.293526	-0.84955	0.176122	-0.495282	-1.02426	-0.883604		6	6	6	33	33	33	NaN	0	NaN	3239300000	108	282	30890.7	13	0	B0BNM1	B0BNM1	NAD(P)H-hydrate epimerase	Apoa1bp	Naxe	NAD(P)H-hydrate epimerase
1.09188	0.901873	0.382731	-1.32586	0.926924	-1.71082	0.294319	-0.107424	-0.453627		5	5	5	22	22	22	NaN	0	NaN	18190000000	131	209	23703.7	15	0	B0BNM9	B0BNM9	Glycolipid transfer protein	GLTP	GLTP	Glycolipid transfer protein
-0.687202	-0.689881	-0.888418	-0.0416021	2.07929	0.929225	-0.716812	0.536839	-0.521436		10	10	10	NaN	NaN	NaN	NaN	0	NaN	36691000000	337	261	28299.6	14	0	B0BNN3	B0BNN3	Carbonic anhydrase 1	Ca1	Ca1	Carbonic anhydrase 1
0.760911	0.365922	0.453886	0.29048	-2.43422	-0.470307	0.659917	-0.228548	0.601964		5	5	5	NaN	NaN	NaN	NaN	0	NaN	22492000000	264	108	12097	6	0	B0K020	B0K020	CDGSH iron-sulfur domain-containing protein 1	Cisd1	Cisd1	CDGSH iron-sulfur domain-containing protein 1
-0.462816	1.07952	0.329131	1.01091	0.440552	-2.24803	-0.169863	0.336937	-0.31634		8	8	8	NaN	NaN	NaN	NaN	0	NaN	1791500000	49	431	47989.6	20	0	B0LT89	B0LT89	Serine/threonine-protein kinase 24;Serine/threonine-protein kinase 24 35 kDa subunit;Serine/threonine-protein kinase 24 12 kDa subunit	Stk24	Stk24	Serine/threonine-protein kinase 24
0.0307922	0.953495	0.025279	0.425261	-1.33191	-1.80179	1.25002	0.5596	-0.110739		11	11	11	NaN	NaN	NaN	NaN	0	NaN	1695100000	78	404	46793.4	24	0	B1H267	B1H267	Sorting nexin-5	Snx5	Snx5	Sorting nexin-5
NaN	NaN	NaN	NaN	NaN	NaN	-0.707107	0.707107	NaN		2	2	2	5	5	5	NaN	0	NaN	147430000	18	505	59055	28	0	B1WBU8	B1WBU8	Pleckstrin homology domain-containing family D member 1	Plekhd1	Plekhd1	Pleckstrin homology domain-containing family D member 1
-1.07452	0.562733	0.115323	-0.183778	0.242637	-0.845625	-0.424323	-0.651477	2.25903		3	3	3	NaN	NaN	NaN	NaN	0	NaN	426470000	9	306	33421.7	12	0	B1WBW4	B1WBW4	Armadillo repeat-containing protein 10	Armc10	Armc10	Armadillo repeat-containing protein 10
NaN	0.204719	NaN	NaN	NaN	NaN	-1.34512	0.0709675	1.06944		3	3	3	NaN	NaN	NaN	NaN	0	NaN	299440000	8	1216	137686	49	0	B2GUV7	B2GUV7	Eukaryotic translation initiation factor 5B	Eif5b	Eif5b	Eukaryotic translation initiation factor 5B
0.899755	0.115204	-1.42645	-0.268102	1.36077	-1.49706	0.535955	0.710587	-0.430654		10	8	8	57	NaN	NaN	NaN	0	NaN	5834100000	180	286	32909.8	13	0	B2GUZ5	B2GUZ5	F-actin-capping protein subunit alpha-1	Capza1	Capza1	F-actin-capping protein subunit alpha-1
0.0297706	0.35745	0.99726	-1.47456	-1.42583	-0.228765	-0.397225	0.783273	1.35862		9	9	9	25	25	25	NaN	0	NaN	3999300000	98	520	56203.8	23	0	B2GV06	B2GV06	Succinyl-CoA:3-ketoacid coenzyme A transferase 1, mitochondrial	Oxct1	Oxct1	Succinyl-CoA:3-ketoacid coenzyme A transferase 1, mitochondrial
-0.372591	0.424584	0.314263	-1.01118	-0.182142	-1.86475	0.287752	1.39778	1.00628		5	5	5	NaN	NaN	NaN	NaN	NaN	NaN	299910000	11	793	89585.2	47	0	B2GV24	B2GV24	E3 UFM1-protein ligase 1	Ufl1	Ufl1	E3 UFM1-protein ligase 1
-0.151293	0.0863401	-0.45962	1.79562	-1.86654	0.693926	0.577583	-0.395204	-0.280817		4	4	4	NaN	NaN	NaN	NaN	0	NaN	959120000	33	157	17790.6	8	0	B2GV38	B2GV38	Ubiquitin-like protein 4A	Ubl4a	Ubl4a	Ubiquitin-like protein 4A
0.801059	-0.368802	-0.55695	-1.51759	1.5946	-0.943609	-0.127458	0.0427369	1.07601		11	11	11	36	36	36	NaN	0	NaN	4831700000	109	408	45821.8	18	0	B2GV54	B2GV54	Neutral cholesterol ester hydrolase 1	Nceh1	Nceh1	Neutral cholesterol ester hydrolase 1
-0.070563	0.776246	1.15381	-0.696689	0.116876	-2.0931	-0.52812	0.63674	0.704793		6	6	6	NaN	NaN	NaN	NaN	0	NaN	500310000	25	699	80733.5	33	0	B2GV87	B2GV87	Receptor-type tyrosine-protein phosphatase epsilon	Ptpre	Ptpre	Receptor-type tyrosine-protein phosphatase epsilon
1.14288	1.0246	0.623007	0.488765	0.308701	-0.159152	-1.87124	-0.477245	-1.08031		11	11	11	NaN	NaN	NaN	NaN	0	NaN	16018000000	431	271	31270	15	0	B2RYG6	B2RYG6	Ubiquitin thioesterase OTUB1	Otub1	Otub1	Ubiquitin thioesterase OTUB1
0.460775	-1.3119	-0.228302	1.29708	NaN	NaN	0.69999	NaN	-0.917649		3	3	3	NaN	NaN	NaN	NaN	0	NaN	317030000	19	291	33015.7	16	0	B2RYM5	B2RYM5	Lys-63-specific deubiquitinase BRCC36	Brcc3	Brcc3	Lys-63-specific deubiquitinase BRCC36
-0.496323	0.784338	0.511374	-0.241663	1.9833	-0.788129	-1.47404	-0.301069	0.0222057		11	11	11	NaN	NaN	NaN	NaN	0	NaN	5771900000	193	313	34581.3	14	0	B2RYW9	B2RYW9	Fumarylacetoacetate hydrolase domain-containing protein 2	Fahd2	Fahd2	Fumarylacetoacetate hydrolase domain-containing protein 2
0.171311	-0.237835	NaN	NaN	NaN	-1.29758	1.59095	-0.693737	0.466894		2	2	2	NaN	NaN	NaN	NaN	0	NaN	5989500000	70	189	21431	6	0	B2RZ37	B2RZ37	Receptor expression-enhancing protein 5	Reep5	Reep5	Receptor expression-enhancing protein 5
0.688382	-0.339407	0.358614	-0.626139	-1.75954	-0.703472	1.15917	-0.166179	1.38857		4	4	4	NaN	NaN	NaN	NaN	0	NaN	2037500000	64	182	20468.7	10	0	B2RZ78	B2RZ78	Vacuolar protein sorting-associated protein 29	Vps29	Vps29	Vacuolar protein sorting-associated protein 29
NaN	-0.668034	-0.232971	NaN	NaN	NaN	NaN	1.47362	-0.572618		3	3	3	NaN	NaN	NaN	NaN	0	NaN	225730000	7	779	87371.4	47	0	B3DMA2	B3DMA2	Acyl-CoA dehydrogenase family member 11	Acad11	Acad11	Acyl-CoA dehydrogenase family member 11
1.3379	0.140793	0.545375	0.950417	-1.71232	0.487452	-0.384176	-1.291	-0.0744317		13	11	11	NaN	NaN	NaN	NaN	0	NaN	14340000000	293	431	49694.6	22	0	B3GNI6	B3GNI6	Septin-11	2011-09-01	2011-09-01	Septin-11
0.930856	-1.07227	-0.446645	1.93223	0.304991	-1.2804	-0.138268	-0.484447	0.25396		8	8	8	NaN	NaN	NaN	NaN	0	NaN	4204800000	126	705	79896.7	29	0	B4F795	B4F795	Choline transporter-like protein 2	Slc44a2	Slc44a2	Choline transporter-like protein 2
-0.689538	0.882702	0.722167	-0.679325	1.10074	-2.01764	-0.212841	0.579469	0.314267		4	4	4	7	7	7	NaN	0	NaN	281470000	25	747	84730.6	36	0	B4F7E8	B4F7E8	Niban-like protein 1	Fam129b	Fam129b	Niban-like protein 1
0.716258	-0.949816	-1.02007	NaN	NaN	NaN	1.55843	0.0335165	-0.338315		3	3	3	NaN	NaN	NaN	NaN	NaN	NaN	275440000	4	657	71694.1	27	0	B5D5N9	B5D5N9	Cationic amino acid transporter 2	Slc7a2	Slc7a2	Cationic amino acid transporter 2
0.821926	0.36221	0.398283	-0.856795	NaN	0.286651	-0.539477	-1.7881	1.3153		8	8	8	NaN	NaN	NaN	NaN	0	NaN	1364900000	60	339	37710.4	21	0	B5DEH2	B5DEH2	Erlin-2	Erlin2	Erlin2	Erlin-2
0.701005	-0.684754	-1.11147	1.06747	-0.810784	-1.36963	1.25281	0.247784	0.707572		4	4	4	NaN	NaN	NaN	NaN	0	NaN	326380000	38	228	26110	13	0	B5DEN9	B5DEN9	Vacuolar protein sorting-associated protein 28 homolog	Vps28	Vps28	Vacuolar protein sorting-associated protein 28 homolog
0.748008	-0.142297	-0.834732	0.0611751	NaN	1.68152	0.684904	-1.04354	-1.15504		4	4	4	NaN	NaN	NaN	NaN	0	NaN	403040000	20	504	54493.9	26	0	B5DF41	B5DF41	Syntaphilin	Snph	Snph	Syntaphilin
1.25765	1.12866	0.927715	-0.855293	0.40415	-0.792368	-1.62891	-0.29238	-0.149223		22	22	22	NaN	NaN	NaN	NaN	0	NaN	5591500000	166	768	88932.2	44	0	B5DF89	B5DF89	Cullin-3	Cul3	Cul3	Cullin-3
0.283174	-0.34833	-0.10943	-1.92021	NaN	1.53292	0.123678	-0.345779	0.783972		4	4	4	NaN	NaN	NaN	NaN	0	NaN	702380000	23	326	36169	16	0	B5DF91	B5DF91	ELAV-like protein	Elavl1	Elavl1	ELAV-like protein 1
-0.842794	-0.0945697	0.820541	-0.814158	-0.950287	-0.808007	-0.250306	1.41749	1.52209		13	13	13	NaN	NaN	NaN	NaN	0	NaN	1686400000	48	911	105435	42	0	B5DFC8	B5DFC8	Eukaryotic translation initiation factor 3 subunit C	Eif3c	Eif3c	Eukaryotic translation initiation factor 3 subunit C
-0.976439	-0.962907	-0.785865	1.99706	0.697123	0.236109	-0.47332	-0.462462	0.730704		16	16	16	NaN	NaN	NaN	NaN	0	NaN	1046900000	72	1396	152976	64	0	B5DFC9	B5DFC9	Nidogen-2	Nid2	Nid2	Nidogen-2
0.113867	0.735706	1.08511	-1.0828	-1.22849	-1.21423	-0.366173	0.800644	1.15637		16	16	16	NaN	NaN	NaN	NaN	0	NaN	38868000000	476	483	53753.4	22	0	B5DFN2	B5DFN2	Adenosylhomocysteinase	Ahcyl1	Ahcyl1	Adenosylhomocysteinase 2
0.545486	0.342328	1.68723	-0.260727	-1.82903	-1.06757	0.0768427	0.0917095	0.413725		5	5	5	NaN	NaN	NaN	NaN	0	NaN	1202100000	41	218	23909.1	15	0	D3Z8L7	D3Z8L7	Ras-related protein R-Ras	Rras	Rras	Ras-related protein R-Ras
-0.876648	1.01717	1.07349	-2.1317	-0.0524585	0.192526	-0.156167	0.458452	0.475339		5	5	5	NaN	NaN	NaN	NaN	0	NaN	11318000000	123	88	10452.4	4	0	D3ZAF6	D3ZAF6	ATP synthase subunit f, mitochondrial	Atp5j2	Atp5j2	ATP synthase subunit f, mitochondrial
-0.0838811	0.380981	1.379	-1.21804	NaN	-1.55957	-0.228181	0.447863	0.881829		2	2	2	NaN	NaN	NaN	NaN	0	NaN	168040000	14	306	33785.3	18	0	D3ZAR1	D3ZAR1		Ldlrap1	Ldlrap1	Low density lipoprotein receptor adapter protein 1
0.348799	0.292598	-0.621019	-0.592653	0.0827799	2.37384	-0.378214	-1.0144	-0.49173		5	5	5	NaN	NaN	NaN	NaN	0	NaN	802650000	23	302	34528.9	18	0	D3ZBE5;P59895	D3ZBE5	Serine/threonine-protein kinase Nek7	Nek7	Nek7	Serine/threonine-protein kinase Nek7
-0.0630302	-0.447671	1.5849	-0.128011	-0.522396	-1.98592	0.303425	0.341001	0.9177		3	3	3	NaN	NaN	NaN	NaN	0	NaN	138970000	15	617	70168	31	0	D3ZC96	D3ZC96	Tetratricopeptide repeat protein 39B	Ttc39b	Ttc39b	Tetratricopeptide repeat protein 39B
0.549904	0.770016	0.936359	-0.715517	1.32747	-0.572742	-1.88133	-0.190498	-0.223661		6	6	6	NaN	NaN	NaN	NaN	0	NaN	2114000000	79	321	34600.8	18	0	D3ZDK7	D3ZDK7		Pgp	Pgp	Glycerol-3-phosphate phosphatase
0.443908	-0.053316	-0.445272	0.497081	NaN	-0.979629	1.87173	-1.37479	0.0402886		2	2	2	NaN	NaN	NaN	NaN	NaN	NaN	226460000	13	293	32456.6	13	0	D3ZE85	D3ZE85	DOMON domain-containing protein FRRS1L	Frrs1l	Frrs1l	DOMON domain-containing protein FRRS1L
0.156376	-0.541593	-1.50713	1.49105	0.255708	-1.21041	1.23795	-0.183414	0.301461		41	41	41	NaN	NaN	NaN	NaN	0	NaN	9231200000	308	2726	290986	145	0	D3ZHA0	D3ZHA0	Filamin-C	Flnc	Flnc	Filamin-C
0.344403	-0.349826	-0.487215	2.19279	-0.75983	0.685622	0.165941	-0.76759	-1.02429		84	84	84	21	21	21	NaN	0	NaN	10237000000	441	5430	619600	310	0	D3ZHV2	D3ZHV2	Microtubule-actin cross-linking factor 1	Macf1	Macf1	Microtubule-actin cross-linking factor 1
NaN	-0.780029	-0.438455	NaN	NaN	NaN	NaN	-0.244268	1.46275		3	3	3	NaN	NaN	NaN	NaN	NaN	NaN	389180000	3	735	81454.6	36	0	D3ZML2	D3ZML2	Serine/threonine-protein kinase BRSK2	Brsk2	Brsk2	Serine/threonine-protein kinase BRSK2
0.547909	0.689831	0.556539	0.946707	0.342118	0.836815	-1.25499	-1.52574	-1.13919		22	22	21	44	44	NaN	NaN	0	NaN	8588100000	169	744	81427.2	37	0	D3ZQG6	D3ZQG6	Tripartite motif-containing protein 2	Trim2	Trim2	Tripartite motif-containing protein 2
NaN	NaN	NaN	NaN	NaN	0.287419	-1.24407	1.15363	-0.196977		6	6	6	NaN	NaN	NaN	NaN	0	NaN	460540000	13	595	65843.8	29	0	D3ZTE0	D3ZTE0	Coagulation factor XII;Coagulation factor XIIa heavy chain;Coagulation factor XIIa light chain	F12	F12	Coagulation factor XII
0.135163	-1.4511	-0.54738	-1.61827	1.00798	0.19985	0.457493	1.05462	0.761657		5	5	5	NaN	NaN	NaN	NaN	0	NaN	1190300000	41	226	25479	12	0	D3ZTX0	D3ZTX0	Transmembrane emp24 domain-containing protein 7	Tmed7	Tmed7	Transmembrane emp24 domain-containing protein 7
NaN	NaN	NaN	1.14156	NaN	-0.72122	NaN	-0.420338	NaN		4	4	4	NaN	NaN	NaN	NaN	0	NaN	211920000	8	406	47330.3	22	0	D3ZUQ0;Q6AYA0	D3ZUQ0	RILP-like protein 1	Rilpl1	Rilpl1	RILP-like protein 1
-0.581054	0.450748	0.935148	-0.366899	NaN	-1.58911	-0.651682	0.239982	1.56286		3	3	3	NaN	NaN	NaN	NaN	0	NaN	550090000	19	299	32719	13	0	D3ZVU9	D3ZVU9	N-acetylaspartate synthetase	Nat8l	Nat8l	N-acetylaspartate synthetase
0.00820521	0.513625	2.04669	0.141949	0.345441	-1.0337	-1.47644	-0.344802	-0.200976		6	6	6	NaN	NaN	NaN	NaN	0	NaN	1548800000	92	198	21927.2	11	0	D3ZW55	D3ZW55	Inosine triphosphate pyrophosphatase	Itpa	Itpa	Inosine triphosphate pyrophosphatase
1.3806	0.231566	NaN	NaN	0.270937	NaN	0.085513	-0.269499	-1.69911		5	5	5	NaN	NaN	NaN	NaN	NaN	NaN	302070000	6	1318	149077	67	0	D3ZXK7	D3ZXK7	E3 ubiquitin-protein ligase RNF123	Rnf123	Rnf123	E3 ubiquitin-protein ligase RNF123
-0.400054	-0.0981006	-0.282812	-0.97136	2.17643	-0.970149	-0.49175	0.936287	0.101503		6	6	6	NaN	NaN	NaN	NaN	0	NaN	1466600000	48	536	58843.7	23	0	D4A1R8	D4A1R8		Cpne1	Cpne1	Copine-1
-0.118615	-0.845104	-0.918295	NaN	NaN	NaN	NaN	1.51436	0.367649		4	4	4	NaN	NaN	NaN	NaN	NaN	NaN	239360000	6	1071	120878	48	0	D4A208	D4A208	SLIT-ROBO Rho GTPase-activating protein 2	Srgap2	Srgap2	SLIT-ROBO Rho GTPase-activating protein 2
1.02614	1.53499	-0.473291	-1.59116	-0.461605	-0.944423	-0.215356	0.722313	0.402399		8	8	8	NaN	NaN	NaN	NaN	0	NaN	5277500000	131	331	37361.6	15	0	D4A4T9	D4A4T9	Cysteine and histidine-rich domain-containing protein 1	Chordc1	Chordc1	Cysteine and histidine-rich domain-containing protein 1
0.420721	0.534052	0.352472	NaN	-2.01901	0.025736	-0.910531	0.457037	1.13953		6	2	2	3	NaN	NaN	NaN	NaN	NaN	447600000	25	1846	207890	97	0	D4A631	D4A631	Brefeldin A-inhibited guanine nucleotide-exchange protein 1	Arfgef1	Arfgef1	Brefeldin A-inhibited guanine nucleotide-exchange protein 1
NaN	NaN	-0.707107	NaN	NaN	NaN	0.707107	NaN	NaN		4	4	4	NaN	NaN	NaN	NaN	0	NaN	156120000	7	1202	134459	60	0	D4A6L0	D4A6L0	Probable G-protein coupled receptor 158	Gpr158	Gpr158	Probable G-protein coupled receptor 158
0.00121615	-0.347321	-0.625603	1.83365	NaN	1.16795	-0.233938	-0.681003	-1.11495		6	6	6	NaN	NaN	NaN	NaN	0	NaN	1625000000	43	261	29210.9	11	0	D4A7N1	D4A7N1	MICOS complex subunit Mic25	Chchd6	Chchd6	MICOS complex subunit Mic25
0.716629	1.9111	-0.106884	-1.75395	0.554765	-0.309598	-0.307512	-0.353094	-0.351449		7	7	7	NaN	NaN	NaN	NaN	0	NaN	1549800000	85	343	36518	20	0	D4AAT7	D4AAT7	ATP-dependent (S)-NAD(P)H-hydrate dehydratase	Carkd	Naxd	ATP-dependent (S)-NAD(P)H-hydrate dehydratase
NaN	-0.754045	NaN	NaN	NaN	NaN	-0.970668	0.831513	0.8932		2	2	2	NaN	NaN	NaN	NaN	NaN	NaN	819220000	5	1147	129178	57	0	D4ABB8	D4ABB8	Probable phospholipid-transporting ATPase IIB	Atp9b	Atp9b	Probable phospholipid-transporting ATPase IIB
1.25758	-0.858204	NaN	NaN	NaN	NaN	0.349047	-0.748425	NaN		2	2	2	NaN	NaN	NaN	NaN	NaN	NaN	155570000	5	480	55355.3	16	0	D4ABP9	D4ABP9	F-box only protein 3	Fbxo3	Fbxo3	F-box only protein 3
-1.02232	0.0354545	0.933006	NaN	NaN	NaN	-1.13214	-0.147974	1.33397		6	4	4	NaN	NaN	NaN	NaN	0	NaN	277150000	8	715	80489.2	39	0	D4ABY2	D4ABY2	Coatomer subunit gamma-2	Copg2	Copg2	Coatomer subunit gamma-2
NaN	NaN	NaN	NaN	NaN	NaN	0.441611	-1.14478	0.703173		2	2	2	NaN	NaN	NaN	NaN	NaN	NaN	384020000	15	147	17312.3	9	0	D4ACN8	D4ACN8	Plasminogen receptor (KT)	Plgrkt	Plgrkt	Plasminogen receptor (KT)
-0.48468	-0.532658	0.610718	0.23564	NaN	1.40566	-1.95078	0.444787	0.271309		3	3	3	9	9	9	NaN	0	NaN	338270000	20	388	42249.9	25	0	P84586;D4AE41;Q4V898	P84586;D4AE41;Q4V898	RNA-binding motif protein, X chromosome retrogene-like;RNA-binding motif protein, X chromosome retrogene-like, N-terminally processed;RNA binding motif protein, X-linked-like-1;RNA-binding motif protein, X chromosome;RNA-binding motif protein, X chromosome, N-terminally processed	Rbmxrtl;Rbmxl1;Rbmx	Rbmxrtl;Rbmxl1;Rbmx	RNA-binding motif protein, X chromosome retrogene-like;RNA binding motif protein, X-linked-like-1;RNA-binding motif protein, X chromosome
NaN	-1.13107	NaN	NaN	-0.488893	NaN	NaN	0.518836	1.10113		2	2	2	NaN	NaN	NaN	NaN	NaN	NaN	101140000	7	622	71319.3	25	0	E9PTT0	E9PTT0	Palmitoyltransferase	Zdhhc17	Zdhhc17	Palmitoyltransferase ZDHHC17
-0.485064	-0.435729	-0.31152	-0.789324	2.40578	0.0420837	-0.733092	0.643688	-0.336827		6	6	6	NaN	NaN	NaN	NaN	0	NaN	1882500000	57	514	55815.1	22	0	E9PU28	E9PU28	Inosine-5-monophosphate dehydrogenase 2	Impdh2	Impdh2	Inosine-5'-monophosphate dehydrogenase 2
0.545603	0.0789789	0.320853	-1.85005	-0.80736	-0.9144	0.603106	0.642884	1.38038		10	10	6	NaN	NaN	22	NaN	0	NaN	3536200000	105	541	60613.9	25	0	F1LM93	F1LM93	Tyrosine-protein kinase Yes	Yes1	Yes1	Tyrosine-protein kinase Yes
-0.265526	1.56333	NaN	NaN	NaN	NaN	-0.972612	-0.65587	0.330676		4	4	3	NaN	NaN	1	NaN	NaN	NaN	1045100000	6	5035	565483	245	0	F1LMY4	F1LMY4	Ryanodine receptor 1	Ryr1	Ryr1	Ryanodine receptor 1
0.945089	0.633602	0.722813	-0.83463	-0.407386	-2.1316	-0.120128	0.435711	0.756529		17	17	17	NaN	NaN	NaN	NaN	0	NaN	8403300000	197	422	47463.8	27	0	F1LMZ8	F1LMZ8	26S proteasome non-ATPase regulatory subunit 11	Psmd11	Psmd11	26S proteasome non-ATPase regulatory subunit 11
0.950793	-1.00366	NaN	NaN	NaN	NaN	-1.0511	0.984695	0.11927		4	4	4	NaN	NaN	NaN	NaN	NaN	NaN	1276700000	10	2139	244875	118	0	F1LNJ2	F1LNJ2	U5 small nuclear ribonucleoprotein 200 kDa helicase	Snrnp200	Snrnp200	U5 small nuclear ribonucleoprotein 200 kDa helicase
-0.859232	-0.629164	1.08652	NaN	NaN	-1.4418	1.07169	0.668883	0.103097		4	4	4	NaN	NaN	NaN	NaN	NaN	NaN	536520000	30	1336	150382	60	0	F1LP90	F1LP90	Misshapen-like kinase 1	Mink1	Mink1	Misshapen-like kinase 1
-0.914054	-0.072022	0.442378	-1.15347	-0.621524	-0.501664	-0.305123	1.46851	1.65697		12	12	12	NaN	NaN	NaN	NaN	0	NaN	3987800000	130	623	67903.2	23	0	F1LQ48	F1LQ48		Hnrnpl	Hnrnpl	Heterogeneous nuclear ribonucleoprotein L
-0.115989	1.05651	0.896419	-1.06186	0.933237	-1.68528	-0.91228	0.429446	0.459799		6	6	6	NaN	NaN	NaN	NaN	0	NaN	788430000	33	814	89114.7	29	0	F1LQX4	F1LQX4	Rho GTPase-activating protein 44	Arhgap44	Arhgap44	Rho GTPase-activating protein 44
0.187849	-0.0459821	0.594524	-2.38533	-0.44524	0.162334	0.100722	0.851943	0.979181		7	7	7	11	11	11	NaN	0	NaN	522720000	38	964	111188	51	0	F1LSG8	F1LSG8		Ccdc132	Vps50	Syndetin
-0.532274	-0.18985	1.09961	NaN	NaN	NaN	0.392217	-1.61397	0.844262		8	8	8	NaN	NaN	NaN	NaN	0	NaN	772100000	33	1049	118842	54	0	F1LYQ8	F1LYQ8	FERM, RhoGEF and pleckstrin domain-containing protein 1	Farp1	Farp1	FERM, RhoGEF and pleckstrin domain-containing protein 1
0.177166	0.494036	0.969631	-1.57964	-0.409519	-1.25037	-0.526121	1.17134	0.95348		4	4	3	NaN	NaN	NaN	NaN	0	NaN	1016600000	39	1634	182563	73	0	F1M5N7	F1M5N7	Kinesin-like protein	Kif21b	Kif21b	Kinesin-like protein KIF21B
-0.128235	-0.397522	1.30661	NaN	NaN	-1.34265	0.561797	NaN	NaN		2	2	2	NaN	NaN	NaN	NaN	NaN	NaN	222710000	21	366	42415.4	19	0	F1M625	F1M625	Ubiquitin carboxyl-terminal hydrolase	Usp46	Usp46	Ubiquitin carboxyl-terminal hydrolase 46
0.506704	-0.369497	NaN	1.66076	NaN	-1.13551	-0.743404	NaN	0.0809424		5	5	4	NaN	NaN	NaN	NaN	0	NaN	246220000	9	2360	267306	109	0	F1MA98	F1MA98	Nucleoprotein TPR	Tpr	Tpr	Nucleoprotein TPR
-0.40146	-0.770741	-1.7094	1.54205	0.506952	0.706026	0.844985	-0.0295778	-0.688829		5	5	5	NaN	NaN	NaN	NaN	0	NaN	2733900000	68	274	31187.2	13	0	G3V7P1	G3V7P1	Syntaxin-12	Stx12	Stx12	Syntaxin-12
0.0285591	0.340503	1.00188	NaN	NaN	NaN	NaN	NaN	-1.37094		4	4	4	NaN	NaN	NaN	NaN	NaN	NaN	220320000	9	295	35004.2	17	0	G3V9R3	G3V9R3	Sulfotransferase 1 family member D1	Sult1d1	Sult1d1	Sulfotransferase 1 family member D1
-1.35579	-0.872306	0.881188	0.268269	NaN	-0.0853552	-0.936536	1.53086	0.569666		5	5	5	NaN	NaN	NaN	NaN	0	NaN	964870000	27	298	32857	19	0	G3V9R8	G3V9R8	Heterogeneous nuclear ribonucleoprotein C	Hnrnpc	Hnrnpc	Heterogeneous nuclear ribonucleoprotein C
0.794538	0.551009	1.27233	-0.963026	-1.00886	-1.58666	0.92201	-0.248809	0.267464		8	8	8	NaN	NaN	NaN	NaN	0	NaN	14344000000	289	215	23624.7	11	0	M0RC99	M0RC99	Ras-related protein Rab-5A	Rab5a	Rab5a	Ras-related protein Rab-5A
-0.53194	-0.58864	-1.46669	1.80871	0.309868	1.27056	-0.309201	-0.144745	-0.347923		11	11	10	NaN	NaN	47	NaN	0	NaN	5414000000	116	285	31426	17	0	O08557	O08557	N(G),N(G)-dimethylarginine dimethylaminohydrolase 1	Ddah1	Ddah1	N(G),N(G)-dimethylarginine dimethylaminohydrolase 1
0.101086	1.10062	0.505486	-1.28094	-0.0991516	-1.77457	-0.343464	0.868162	0.922773		7	6	6	NaN	NaN	NaN	NaN	0	NaN	1839900000	64	369	40866.7	23	0	O08618	O08618	Phosphoribosyl pyrophosphate synthase-associated protein 2	Prpsap2	Prpsap2	Phosphoribosyl pyrophosphate synthase-associated protein 2
0.650275	-0.106197	-0.0757243	0.540378	-1.8131	-1.42217	1.1778	0.627001	0.421738		11	11	11	NaN	NaN	NaN	NaN	0	NaN	1857100000	66	835	88956.1	33	0	O08629	O08629	Transcription intermediary factor 1-beta	Trim28	Trim28	Transcription intermediary factor 1-beta
0.232556	0.72181	0.234556	-0.260006	-1.85927	-1.33335	1.19523	0.349603	0.718873		18	18	18	NaN	NaN	NaN	NaN	0	NaN	29681000000	371	533	56493.4	24	0	O08651	O08651	D-3-phosphoglycerate dehydrogenase	Phgdh	Phgdh	D-3-phosphoglycerate dehydrogenase
1.05036	-0.109778	NaN	NaN	NaN	NaN	NaN	NaN	-0.940582		5	5	5	NaN	NaN	NaN	NaN	NaN	NaN	392730000	11	422	47463.5	19	0	O08654	O08654	UPF0183 protein C16orf70 homolog			UPF0183 protein C16orf70 homolog
-0.0800547	0.304837	1.28066	-1.46224	-0.953962	-1.01229	-0.0404836	0.622387	1.34114		18	18	18	11	11	11	NaN	0	NaN	1364600000	61	2096	236920	119	0	O08662	O08662	Phosphatidylinositol 4-kinase alpha	Pi4ka	Pi4ka	Phosphatidylinositol 4-kinase alpha
NaN	NaN	0.707107	NaN	NaN	NaN	NaN	NaN	-0.707107		6	2	2	NaN	NaN	NaN	NaN	NaN	NaN	175470000	2	793	88234.6	45	0	O08678	O08678	Serine/threonine-protein kinase MARK1	Mark1	Mark1	Serine/threonine-protein kinase MARK1
-0.835517	0.677948	1.29962	-1.04458	0.474721	-1.76574	0.0190996	0.707423	0.467034		4	4	4	31	31	31	NaN	0	NaN	460180000	30	184	20835.9	9	0	O08697	O08697	ADP-ribosylation factor-like protein 2	Arl2	Arl2	ADP-ribosylation factor-like protein 2
0.193292	0.344449	1.34738	-1.77547	0.181522	-1.03272	-0.768817	0.60502	0.905351		14	14	14	NaN	NaN	NaN	NaN	0	NaN	1798000000	81	570	64893.6	31	0	O08700	O08700	Vacuolar protein sorting-associated protein 45	Vps45	Vps45	Vacuolar protein sorting-associated protein 45
1.36458	0.628394	0.857448	-0.00269653	-2.10125	-0.725887	0.101559	-0.215807	0.0936635		9	9	9	NaN	NaN	NaN	NaN	0	NaN	5235300000	109	333	37378.1	11	0	O08730	O08730	Glycogenin-1	Gyg1	Gyg1	Glycogenin-1
NaN	-0.468737	-0.869515	NaN	NaN	-0.70408	-0.173255	1.83031	0.385273		3	3	3	14	14	14	NaN	NaN	NaN	209890000	5	430	48267.8	17	0	O08835	O08835	Synaptotagmin-11	Syt11	Syt11	Synaptotagmin-11
0.707107	NaN	NaN	NaN	NaN	NaN	NaN	NaN	-0.707107		4	4	4	NaN	NaN	NaN	NaN	0	NaN	217460000	3	340	39135.2	19	0	O08836	O08836	Immunoglobulin-binding protein 1	Igbp1	Igbp1	Immunoglobulin-binding protein 1
0.951089	-0.0711182	-0.846682	1.35894	-1.77911	0.516154	0.802127	-0.37092	-0.560477		14	14	14	NaN	NaN	NaN	NaN	0	NaN	10949000000	225	683	74877.9	28	0	O08838	O08838	Amphiphysin	Amph	Amph	Amphiphysin
0.133263	-0.355436	-0.45865	1.84675	-1.16598	1.19939	0.136999	-0.155635	-1.1807		11	11	11	NaN	NaN	NaN	NaN	0	NaN	8713900000	210	588	64533.2	28	0	O08839	O08839	Myc box-dependent-interacting protein 1	Bin1	Bin1	Myc box-dependent-interacting protein 1
0.699803	0.311215	0.61337	-0.0137149	1.39299	-1.17946	-1.65883	-0.768279	0.6029		5	5	5	NaN	NaN	NaN	NaN	0	NaN	1440800000	34	433	47680.9	17	0	O08875	O08875	Serine/threonine-protein kinase DCLK1	Dclk1	Dclk1	Serine/threonine-protein kinase DCLK1
0.0422847	-0.364894	-0.266206	1.25973	NaN	1.62632	-0.035484	-1.09014	-1.17162		3	3	3	NaN	NaN	NaN	NaN	0	NaN	547690000	19	142	15288.7	4	0	O08957	O08957	Neuritin	Nrn1	Nrn1	Neuritin
-0.323008	0.845593	0.588659	-1.21375	1.84859	-0.772044	-1.144	-0.0255233	0.195479		12	12	12	NaN	NaN	NaN	NaN	0	NaN	1975400000	88	650	72619.9	33	0	O09175	O09175	Aminopeptidase B	Rnpep	Rnpep	Aminopeptidase B
-0.320955	0.506648	0.60234	NaN	-0.573849	-2.12194	0.304218	0.618316	0.985225		11	11	11	NaN	NaN	NaN	NaN	0	NaN	1114900000	52	765	88483.1	36	0	O09178;P10759	O09178	AMP deaminase 3	Ampd3	Ampd3	AMP deaminase 3
-0.15019	0.839549	1.02529	-1.08742	1.68249	-0.624478	-0.932454	0.200387	-0.95317		14	14	14	51	51	51	NaN	0	NaN	31381000000	487	349	37452.5	21	0	O35077	O35077	Glycerol-3-phosphate dehydrogenase [NAD(+)], cytoplasmic	Gpd1	Gpd1	Glycerol-3-phosphate dehydrogenase [NAD(+)], cytoplasmic
0.973385	1.06043	0.934342	-1.55545	-1.25613	-0.691963	-0.146357	0.744059	-0.0623175		3	3	3	NaN	NaN	NaN	NaN	0	NaN	1413300000	38	346	38820.3	14	0	O35078	O35078	D-amino-acid oxidase	Dao	Dao	D-amino-acid oxidase
0.572845	0.882988	0.933529	-0.673603	-1.33749	-1.19273	-0.447579	-0.193237	1.45527		8	8	8	NaN	NaN	NaN	NaN	0	NaN	1258700000	57	453	51060.4	31	0	O35094	O35094	Mitochondrial import inner membrane translocase subunit TIM44	Timm44	Timm44	Mitochondrial import inner membrane translocase subunit TIM44
0.170304	0.779581	1.48345	-1.18201	-1.48082	0.74868	-0.924821	0.00971285	0.395913		19	19	19	NaN	NaN	NaN	NaN	0	NaN	26010000000	530	729	78923.4	34	0	O35095	O35095	Neurochondrin	Ncdn	Ncdn	Neurochondrin
-0.0256527	-0.645966	-0.701578	1.78365	0.329745	1.4003	-0.27138	-1.03062	-0.838497		17	17	17	NaN	NaN	NaN	NaN	0	NaN	12396000000	296	583	65022	30	0	O35112	O35112	CD166 antigen	Alcam	Alcam	CD166 antigen
0.0325588	0.243459	0.651731	-0.744358	-0.787845	-1.56993	-0.505028	1.21567	1.46375		16	16	16	NaN	NaN	NaN	NaN	0	NaN	3665100000	130	905	102551	49	0	O35142	O35142	Coatomer subunit beta	Copb2	Copb2	Coatomer subunit beta'
0.0472765	0.177734	0.880548	1.28156	NaN	-1.70251	0.769187	-0.753928	-0.699864		5	5	5	NaN	NaN	NaN	NaN	0	NaN	449220000	19	471	51795.4	22	0	O35162	O35162	Heat shock 70 kDa protein 13	Hspa13	Hspa13	Heat shock 70 kDa protein 13
-0.56794	-0.105303	-0.0175385	2.1306	-0.312172	0.826738	-0.430758	-0.0549389	-1.46869		12	12	11	NaN	NaN	NaN	NaN	0	NaN	18341000000	389	352	39899.3	16	0	O35179	O35179	Endophilin-A1	Sh3gl2	Sh3gl2	Endophilin-A1
0.122535	0.0276051	-0.311361	1.88401	NaN	0.854726	-0.348614	-1.14337	-1.08553		2	2	2	NaN	NaN	NaN	NaN	0	NaN	226290000	12	347	39166.5	21	0	O35180	O35180	Endophilin-A3	Sh3gl3	Sh3gl3	Endophilin-A3
0.217705	-0.103606	-1.97675	-0.974107	1.01647	1.23973	-0.281113	0.611207	0.250463		5	5	5	NaN	NaN	NaN	NaN	0	NaN	214150000	17	481	54589.5	23	0	O35217	O35217	Multiple inositol polyphosphate phosphatase 1	Minpp1	Minpp1	Multiple inositol polyphosphate phosphatase 1
0.0314188	-0.0570078	0.214051	1.92269	-1.6593	0.919358	-0.335782	-0.463433	-0.571992		12	12	12	NaN	NaN	NaN	NaN	0	NaN	26549000000	382	224	24818.6	14	0	O35244	O35244	Peroxiredoxin-6	Prdx6	Prdx6	Peroxiredoxin-6
0.46573	0.316913	-0.414279	0.758965	-0.0625068	1.66007	0.148144	-1.55092	-1.32212		4	4	4	NaN	NaN	NaN	NaN	0	NaN	1739700000	74	232	25863.4	16	0	O35263	O35263	Platelet-activating factor acetylhydrolase IB subunit gamma	Pafah1b3	Pafah1b3	Platelet-activating factor acetylhydrolase IB subunit gamma
0.407249	-0.110833	-0.573919	2.05902	-0.969993	0.89555	0.00714835	-0.999753	-0.714469		5	5	5	NaN	NaN	NaN	NaN	0	NaN	15365000000	250	229	25581.3	7	0	O35264	O35264	Platelet-activating factor acetylhydrolase IB subunit beta	Pafah1b2	Pafah1b2	Platelet-activating factor acetylhydrolase IB subunit beta
0.233251	-0.474652	NaN	-0.699513	NaN	NaN	1.6512	NaN	-0.710289		3	3	3	NaN	NaN	NaN	NaN	NaN	NaN	187610000	7	817	89646.4	30	0	O35274	O35274	Neurabin-2	Ppp1r9b	Ppp1r9b	Neurabin-2
1.07324	1.0977	0.982096	-1.29857	0.325832	-1.24972	-1.0542	-0.258707	0.382332		27	27	27	NaN	NaN	NaN	NaN	0	NaN	26868000000	621	755	83908.4	52	0	O35303	O35303	Dynamin-1-like protein	Dnm1l	Dnm1l	Dynamin-1-like protein
0.827548	1.37876	1.60005	-0.480767	-0.212485	-0.805078	-1.0324	-0.796085	-0.479542		9	9	9	NaN	NaN	NaN	NaN	0	NaN	10952000000	192	312	34908.1	16	0	O35331	O35331	Pyridoxal kinase	Pdxk	Pdxk	Pyridoxal kinase
1.20138	0.312176	-0.157523	-0.572404	0.21495	-2.31107	0.508552	0.139535	0.664405		13	7	7	NaN	NaN	NaN	NaN	0	NaN	2618500000	68	340	37363	14	0	O35353	O35353	Guanine nucleotide-binding protein subunit beta-4	Gnb4	Gnb4	Guanine nucleotide-binding protein subunit beta-4
1.04308	-0.224811	1.03398	0.803542	-1.07444	0.440247	-1.38184	-1.23757	0.597804		9	9	9	NaN	NaN	NaN	NaN	0	NaN	5835200000	159	525	57407.2	19	0	O35458	O35458	Vesicular inhibitory amino acid transporter	Slc32a1	Slc32a1	Vesicular inhibitory amino acid transporter
0.265401	-0.561032	-0.100571	1.38074	0.419503	1.34436	-0.0297997	-1.45591	-1.26269		9	9	9	NaN	NaN	NaN	NaN	0	NaN	24334000000	266	217	24441	14.5	0	O35509;P62494	O35509;P62494	Ras-related protein Rab-11B;Ras-related protein Rab-11A	Rab11b;Rab11a	Rab11b;Rab11a	Ras-related protein Rab-11B;Ras-related protein Rab-11A
0.0595362	NaN	-0.961213	NaN	NaN	-1.46638	0.880331	0.88636	0.601365		4	4	4	15	15	15	NaN	0	NaN	1041100000	23	293	34963.6	8	0	O35532	O35532	Methylsterol monooxygenase 1	Msmo1	Msmo1	Methylsterol monooxygenase 1
-0.543698	-0.493915	-0.51804	NaN	NaN	NaN	-0.544164	1.96951	0.130304		2	2	2	NaN	NaN	NaN	NaN	0	NaN	120940000	5	670	74327	37	0	O35547	O35547	Long-chain-fatty-acid--CoA ligase 4	Acsl4	Acsl4	Long-chain-fatty-acid--CoA ligase 4
0.0240049	-1.25549	-1.40661	1.21213	NaN	NaN	0.171335	0.909203	0.345435		4	4	4	NaN	NaN	NaN	NaN	NaN	NaN	953460000	6	862	99427.7	53	0	O35550	O35550	Rab GTPase-binding effector protein 1	Rabep1	Rabep1	Rab GTPase-binding effector protein 1
1.01521	0.685687	0.516281	-0.861319	1.55377	-0.892498	-1.4553	-0.234572	-0.327254		25	25	25	NaN	NaN	NaN	NaN	0	NaN	21331000000	552	592	64208.4	35	0	O35567	O35567	Bifunctional purine biosynthesis protein PURH;Phosphoribosylaminoimidazolecarboxamide formyltransferase;IMP cyclohydrolase	Atic	Atic	Bifunctional purine biosynthesis protein PURH
0.499418	0.410093	-0.197546	-0.650376	-1.94164	-0.270319	1.67779	0.655039	-0.182462		5	5	5	NaN	NaN	NaN	NaN	0	NaN	1631100000	67	227	26396.2	10	0	O35760	O35760	Isopentenyl-diphosphate Delta-isomerase 1	Idi1	Idi1	Isopentenyl-diphosphate Delta-isomerase 1
2.06916	0.337507	0.514372	-0.847385	-0.6474	-0.262026	-0.847055	0.667983	-0.985157		16	16	12	31	31	NaN	NaN	0	NaN	15093000000	303	577	67738.9	33	0	O35763	O35763	Moesin	Msn	Msn	Moesin
-0.504049	-0.349127	-1.02779	1.59018	NaN	0.985896	0.87213	-0.585751	-0.981491		4	4	4	NaN	NaN	NaN	NaN	0	NaN	396750000	24	315	36996.6	14	0	O35783	O35783	Calumenin	Calu	Calu	Calumenin
-0.543098	-0.812675	1.19357	-0.312721	1.41439	-1.80059	0.191004	0.238782	0.431337		5	5	5	NaN	NaN	NaN	NaN	0	NaN	1010100000	45	495	54389.5	20	0	O35795	O35795	Ectonucleoside triphosphate diphosphohydrolase 2	Entpd2	Entpd2	Ectonucleoside triphosphate diphosphohydrolase 2
-0.622627	-0.347971	-0.970053	1.48353	-0.778855	1.76416	0.250577	-0.0257275	-0.753032		7	7	7	NaN	NaN	NaN	NaN	0	NaN	11266000000	241	279	30996.9	13	0	O35796	O35796	Complement component 1 Q subcomponent-binding protein, mitochondrial	C1qbp	C1qbp	Complement component 1 Q subcomponent-binding protein, mitochondrial
-0.0439082	-0.323605	-0.689204	1.89576	-0.748287	1.3719	0.0407466	-0.397736	-1.10568		17	17	17	NaN	NaN	NaN	NaN	0	NaN	11396000000	211	543	62570.1	34	0	O35814	O35814	Stress-induced-phosphoprotein 1	Stip1	Stip1	Stress-induced-phosphoprotein 1
-0.616872	-0.0674338	-0.439835	-1.6557	0.435587	-0.404984	0.783137	1.92653	0.0395665		5	5	5	NaN	NaN	NaN	NaN	0	NaN	2098400000	69	412	45765.6	22	0	O35824	O35824	DnaJ homolog subfamily A member 2	Dnaja2	Dnaja2	DnaJ homolog subfamily A member 2
0.819316	0.53269	0.706483	-1.16183	NaN	-1.67259	1.06759	-0.474589	0.182924		6	6	6	NaN	NaN	NaN	NaN	0	NaN	684620000	24	922	100782	39	0	O35828	O35828	Coronin-7	Coro7	Coro7	Coronin-7
0.710003	0.475135	0.262555	-0.706915	-0.935311	-1.99035	0.398763	1.12869	0.657429		11	10	9	NaN	NaN	NaN	NaN	0	NaN	3355600000	113	451	51881.6	27	0	O35832;O35831;Q63699;P35426;Q641Z4;Q3MJK5	O35832	Cyclin-dependent kinase 18	Cdk18	Cdk18	Cyclin-dependent kinase 18
NaN	NaN	NaN	NaN	NaN	NaN	NaN	0.707107	-0.707107		2	2	2	NaN	NaN	NaN	NaN	0	NaN	139550000	6	1829	207678	92	0	O35889	O35889	Afadin	Mllt4	Afdn	Afadin
-0.303099	0.558989	0.205739	-0.33956	2.32529	-0.756415	-0.745755	0.0049204	-0.950112		5	5	5	23	23	23	NaN	0	NaN	2561600000	55	309	34109.2	15	0	O35952	O35952	Hydroxyacylglutathione hydrolase, mitochondrial	Hagh	Hagh	Hydroxyacylglutathione hydrolase, mitochondrial
0.153598	-0.0575911	-1.5568	1.9409	-0.439472	0.834808	0.196328	-0.162103	-0.909674		6	5	5	NaN	NaN	NaN	NaN	0	NaN	475320000	23	368	41492	17	0	O35964	O35964	Endophilin-A2	Sh3gl1	Sh3gl1	Endophilin-A2
0.0896211	-0.378149	-1.2816	1.49517	-1.00756	1.18997	0.949404	-0.728285	-0.328577		7	7	7	NaN	NaN	NaN	NaN	0	NaN	2428000000	123	370	40680	22	0	O35987	O35987	NSFL1 cofactor p47	Nsfl1c	Nsfl1c	NSFL1 cofactor p47
0.371317	-1.58243	0.803205	1.29246	NaN	0.0423496	-1.35523	0.45111	-0.0227826		2	2	2	NaN	NaN	NaN	NaN	NaN	NaN	514490000	12	463	51122.7	12	0	O54715	O54715	V-type proton ATPase subunit S1	Atp6ap1	Atp6ap1	V-type proton ATPase subunit S1
-0.223488	1.26417	1.01047	0.295912	0.435627	-1.93809	-1.11939	0.0802311	0.194562		7	7	7	NaN	NaN	NaN	NaN	0	NaN	1045900000	41	394	45100.3	22	0	O54783	O54783	Choline/ethanolamine kinase	Chkb	Chkb	Choline/ethanolamine kinase
-0.0653645	-0.472381	0.00122886	1.09675	-2.23715	0.517693	0.8154	-0.363283	0.707112		11	11	11	NaN	NaN	NaN	NaN	0	NaN	3481500000	85	825	91169	32	0	O54861	O54861	Sortilin	Sort1	Sort1	Sortilin
NaN	0.697648	NaN	NaN	NaN	NaN	0.959692	-0.497843	-1.1595		4	4	4	NaN	NaN	NaN	NaN	NaN	NaN	573100000	9	1732	197064	83	0	O54874	O54874	Serine/threonine-protein kinase MRCK alpha	Cdc42bpa	Cdc42bpa	Serine/threonine-protein kinase MRCK alpha
-1.20462	0.170876	NaN	NaN	NaN	NaN	NaN	1.21879	-0.185049		4	4	4	NaN	NaN	NaN	NaN	0	NaN	605470000	11	924	104031	49	0	O54921	O54921	Exocyst complex component 2	Exoc2	Exoc2	Exocyst complex component 2
-1.48888	0.403357	1.75587	-0.343158	NaN	-0.996215	0.551094	-0.18248	0.300411		10	10	10	NaN	NaN	NaN	NaN	0	NaN	745180000	21	653	75045.5	32	0	O54922	O54922	Exocyst complex component 7	Exoc7	Exoc7	Exocyst complex component 7
-0.973877	0.622658	1.29669	-0.899268	-0.648446	-1.28917	-0.137196	0.92799	1.10061		11	11	11	NaN	NaN	NaN	NaN	0	NaN	962150000	69	716	81043.3	46	0	O54924	O54924	Exocyst complex component 8	Exoc8	Exoc8	Exocyst complex component 8
0.270054	1.54607	1.01807	-1.37957	0.226099	-1.08576	-1.11032	0.230935	0.284426		16	16	16	NaN	NaN	NaN	NaN	0	NaN	4192300000	200	623	69657.5	35	0	O54975	O54975	Xaa-Pro aminopeptidase 1;Xaa-Pro aminopeptidase 1, N-terminally processed	Xpnpep1	Xpnpep1	Xaa-Pro aminopeptidase 1
NaN	NaN	NaN	NaN	NaN	-0.197115	NaN	1.08388	-0.886764		2	2	2	NaN	NaN	NaN	NaN	0	NaN	243580000	9	240	26187.3	11	0	O55006	O55006	Protein RoBo-1			Protein RoBo-1
NaN	NaN	NaN	NaN	NaN	NaN	-0.899966	1.07652	-0.176551		3	3	3	NaN	NaN	NaN	NaN	NaN	NaN	93475000	4	2035	229447	90	0	O55007	O55007	Ral GTPase-activating protein subunit alpha-1	Ralgapa1	Ralgapa1	Ral GTPase-activating protein subunit alpha-1
0.629319	0.577638	0.193914	-1.56327	NaN	-1.58884	0.518752	0.959643	0.272846		7	5	5	NaN	NaN	NaN	NaN	0	NaN	630150000	33	640	69286	25	0	O55012	O55012	Phosphatidylinositol-binding clathrin assembly protein	Picalm	Picalm	Phosphatidylinositol-binding clathrin assembly protein
0.127643	-0.00566464	0.718788	-1.3028	1.54771	-1.50643	0.482689	-0.690543	0.628615		6	6	5	NaN	NaN	NaN	NaN	0	NaN	466700000	29	646	73140.1	37	0	O55043	O55043	Rho guanine nucleotide exchange factor 7	Arhgef7	Arhgef7	Rho guanine nucleotide exchange factor 7
0.699702	0.54066	0.942018	-1.5665	1.42127	-1.01363	-0.906471	-0.0786941	-0.0383576		19	19	19	NaN	NaN	NaN	NaN	0	NaN	8798700000	257	738	83038.7	36	0	O55096	O55096	Dipeptidyl peptidase 3	Dpp3	Dpp3	Dipeptidyl peptidase 3
0.584847	0.272718	-0.195521	1.41632	-2.22139	0.099457	0.590383	-0.0533278	-0.493481		20	20	20	25	25	25	NaN	0	NaN	2815500000	107	1046	115480	62	0	O55156;Q9JK25	O55156	CAP-Gly domain-containing linker protein 2	Clip2	Clip2	CAP-Gly domain-containing linker protein 2
-0.235585	0.219332	0.637342	-1.4185	-1.04966	-1.15615	0.857472	1.10624	1.0395		10	10	10	NaN	NaN	NaN	NaN	0	NaN	1165700000	36	723	82103.1	37	0	O55166	O55166	Vacuolar protein sorting-associated protein 52 homolog	Vps52	Vps52	Vacuolar protein sorting-associated protein 52 homolog
0.893663	0.0484799	-1.80594	0.641033	NaN	1.36521	-0.0020858	-0.649763	-0.490591		2	2	2	NaN	NaN	NaN	NaN	0	NaN	178720000	9	466	50039.2	14	0	O55170	O55170	Transcription factor SOX-10	Sox10	Sox10	Transcription factor SOX-10
-0.361226	1.00973	1.71516	-0.82288	NaN	-0.563701	-1.35478	0.131613	0.246082		8	8	3	NaN	NaN	NaN	NaN	0	NaN	2024900000	46	453	49701.2	23	0	O55171	O55171	Acyl-coenzyme A thioesterase 2, mitochondrial	Acot2	Acot2	Acyl-coenzyme A thioesterase 2, mitochondrial
NaN	0.707107	NaN	NaN	NaN	NaN	NaN	NaN	-0.707107		3	3	3	NaN	NaN	NaN	NaN	NaN	NaN	178240000	4	559	63593.3	26	0	O55173	O55173	3-phosphoinositide-dependent protein kinase 1	Pdpk1	Pdpk1	3-phosphoinositide-dependent protein kinase 1
0.529117	0.957255	0.87174	-0.727939	0.555019	-1.73486	-1.32611	0.602276	0.273496		19	19	19	NaN	NaN	NaN	NaN	0	NaN	4184800000	173	710	80741.5	46	0	O70196	O70196	Prolyl endopeptidase	Prep	Prep	Prolyl endopeptidase
0.0636998	-0.761859	-1.01073	1.38634	-0.602414	0.907088	1.48371	-0.660261	-0.805574		5	5	5	NaN	NaN	NaN	NaN	0	NaN	834370000	34	261	29850.7	11	0	O70257	O70257	Syntaxin-7	Stx7	Stx7	Syntaxin-7
-0.58531	0.560413	0.143602	0.867985	-2.10859	0.311994	-0.277969	1.3676	-0.279724		9	8	8	NaN	NaN	NaN	NaN	0	NaN	3671800000	94	744	80795.6	36	0	O70277	O70277	Tripartite motif-containing protein 3	Trim3	Trim3	Tripartite motif-containing protein 3
0.390629	0.310737	1.69132	-1.30102	-0.613301	-1.19282	-0.665459	0.646567	0.73335		12	12	12	NaN	NaN	NaN	NaN	0	NaN	12912000000	250	261	27245.6	14	0	O70351	O70351	3-hydroxyacyl-CoA dehydrogenase type-2	Hsd17b10	Hsd17b10	3-hydroxyacyl-CoA dehydrogenase type-2
0.474493	0.533933	0.815769	-1.80213	NaN	-1.02968	0.586254	-0.525501	0.946859		7	7	7	NaN	NaN	NaN	NaN	0	NaN	1367600000	31	579	63348.6	36	0	O70441	O70441	Synapsin-3	Syn3	Syn3	Synapsin-3
0.556718	0.532261	1.28541	-0.933097	0.700798	-1.47117	-1.2948	-0.110692	0.734572		27	27	27	NaN	NaN	NaN	NaN	0	NaN	10434000000	276	2622	284443	140	0	O70511	O70511	Ankyrin-3	Ank3	Ank3	Ankyrin-3
0.36649	-0.41817	-0.908877	1.47748	-0.534857	1.5497	0.388322	-0.958837	-0.961252		6	6	6	NaN	NaN	NaN	NaN	0	NaN	4353000000	109	314	34157.2	12	0	O70593	O70593	Small glutamine-rich tetratricopeptide repeat-containing protein alpha	Sgta	Sgta	Small glutamine-rich tetratricopeptide repeat-containing protein alpha
-1.01776	-0.104436	0.977991	-0.525414	1.85666	-1.08098	NaN	-0.275959	0.169904		2	2	2	5	5	5	NaN	0	NaN	167670000	10	836	93304.9	34	0	O70595	O70595	ATP-binding cassette sub-family B member 6, mitochondrial	Abcb6	Abcb6	ATP-binding cassette sub-family B member 6, mitochondrial
1.00373	0.479147	-0.0144944	0.805712	-1.85857	-0.173416	1.22452	-0.897993	-0.568637		9	9	8	NaN	NaN	NaN	NaN	0	NaN	2097300000	70	575	60158	13	0	O88339	O88339	Epsin-1	Epn1	Epn1	Epsin-1
0.886807	1.31282	0.935461	0.460378	-1.09036	-1.31879	-1.18001	0.199946	-0.206261		5	5	5	NaN	NaN	NaN	NaN	0	NaN	928650000	45	186	20994.9	11	0	O88350	O88350	Putative hydrolase RBBP9	Rbbp9	Rbbp9	Putative hydrolase RBBP9
-0.903444	1.40089	-0.344191	-1.38355	NaN	1.35594	0.409534	-0.407466	-0.127707		8	4	4	NaN	NaN	NaN	NaN	0	NaN	758830000	44	416	47263.8	18	0	O88377	O88377	Phosphatidylinositol 5-phosphate 4-kinase type-2 beta	Pip4k2b	Pip4k2b	Phosphatidylinositol 5-phosphate 4-kinase type-2 beta
NaN	NaN	NaN	NaN	0.707107	NaN	NaN	NaN	-0.707107		3	3	2	NaN	NaN	NaN	NaN	0	NaN	260810000	3	1978	225159	66	0	O88420	O88420	Sodium channel protein type 8 subunit alpha	Scn8a	Scn8a	Sodium channel protein type 8 subunit alpha
0.128027	0.524234	0.517258	-1.58603	0.374993	-0.966209	-0.958452	1.69019	0.275994		5	5	5	NaN	NaN	NaN	NaN	0	NaN	547280000	25	538	61207.3	33	0	O88483	O88483	[Pyruvate dehydrogenase [acetyl-transferring]]-phosphatase 1, mitochondrial	Pdp1	Pdp1	[Pyruvate dehydrogenase [acetyl-transferring]]-phosphatase 1, mitochondrial
0.605688	-0.867291	1.23058	-0.832703	0.824551	-1.71018	0.1716	-0.371537	0.949293		10	10	10	NaN	NaN	NaN	NaN	0	NaN	3688000000	95	553	60050.7	21	0	O88506	O88506	STE20/SPS1-related proline-alanine-rich protein kinase	Stk39	Stk39	STE20/SPS1-related proline-alanine-rich protein kinase
0.856196	1.43622	0.602244	0.878083	-1.40703	-1.23993	-0.178638	-0.282731	-0.664418		9	9	9	NaN	NaN	NaN	NaN	0	NaN	1477700000	38	961	104700	37	0	O88588	O88588	Phosphofurin acidic cluster sorting protein 1	Pacs1	Pacs1	Phosphofurin acidic cluster sorting protein 1
1.84544	1.17726	-0.046224	0.290813	-0.449493	-0.412236	-0.31194	-0.566815	-1.52681		39	39	38	NaN	NaN	NaN	NaN	0	NaN	57614000000	1093	840	94056.5	50	0	O88600	O88600	Heat shock 70 kDa protein 4	Hspa4	Hspa4	Heat shock 70 kDa protein 4
1.47742	1.28975	0.278039	-1.18858	-0.437813	-1.44163	-0.46702	0.41182	0.0780023		9	9	9	NaN	NaN	NaN	NaN	0	NaN	4224800000	119	404	45219.9	21	0	O88637	O88637	Ethanolamine-phosphate cytidylyltransferase	Pcyt2	Pcyt2	Ethanolamine-phosphate cytidylyltransferase
NaN	NaN	NaN	NaN	NaN	NaN	-0.777931	1.12796	-0.350033		4	3	3	NaN	NaN	NaN	NaN	0	NaN	416080000	10	372	41056.8	18	0	O88656	O88656	Actin-related protein 2/3 complex subunit 1B	Arpc1b	Arpc1b	Actin-related protein 2/3 complex subunit 1B
0.884323	0.587912	1.06534	-1.16123	0.355387	-1.72954	-0.920509	0.493426	0.424883		7	7	7	5	5	5	NaN	0	NaN	1839600000	44	1816	204170	96	0	O88658	O88658	Kinesin-like protein KIF1B	Kif1b	Kif1b	Kinesin-like protein KIF1B
0.435833	0.0957205	-1.86899	-0.775734	0.940802	0.764741	-1.06505	0.643228	0.829449		21	21	21	NaN	NaN	NaN	NaN	0	NaN	7103500000	224	953	105748	47	0	O88761	O88761	26S proteasome non-ATPase regulatory subunit 1	Psmd1	Psmd1	26S proteasome non-ATPase regulatory subunit 1
0.0117662	-0.126173	-0.140037	0.0059266	NaN	NaN	-1.85346	0.651088	1.45089		4	4	4	NaN	NaN	NaN	NaN	0	NaN	506870000	10	887	101534	46	0	O88763	O88763	Phosphatidylinositol 3-kinase catalytic subunit type 3	Pik3c3	Pik3c3	Phosphatidylinositol 3-kinase catalytic subunit type 3
-0.218604	-0.436089	-0.975534	1.91943	-0.328343	1.16206	-0.224441	0.329846	-1.22833		6	6	6	NaN	NaN	NaN	NaN	0	NaN	15919000000	204	189	19974.2	12	0	O88767	O88767	Protein deglycase DJ-1	Park7	Park7	Protein deglycase DJ-1
-0.252751	-1.03045	-0.978801	1.21665	1.24488	1.39288	-0.386517	-0.416251	-0.789636		5	5	5	NaN	NaN	NaN	NaN	0	NaN	4287200000	72	328	37005.2	18	0	O88775	O88775	Embigin	Emb	Emb	Embigin
0.317618	-0.10049	-0.409263	1.59705	NaN	1.16163	-0.42416	-0.654804	-1.48758		5	5	5	NaN	NaN	NaN	NaN	0	NaN	1301900000	44	261	30184.4	12	0	O88794	O88794	Pyridoxine-5-phosphate oxidase	Pnpo	Pnpo	Pyridoxine-5'-phosphate oxidase
0.831158	0.248721	-0.188311	1.09445	-1.94931	1.16608	0.0425996	-0.819133	-0.426245		12	12	12	NaN	NaN	NaN	NaN	0	NaN	1677100000	53	1499	163454	63	0	O88902	O88902	Tyrosine-protein phosphatase non-receptor type 23	Ptpn23	Ptpn23	Tyrosine-protein phosphatase non-receptor type 23
0.870951	0.632457	-1.99722	-0.0640162	NaN	NaN	-0.362629	0.843208	0.0772448		4	4	4	NaN	NaN	NaN	NaN	0	NaN	265490000	10	1515	166615	69	0	O88917	O88917	Latrophilin-1	Lphn1	Adgrl1	Adhesion G protein-coupled receptor L1
0.902655	1.15463	1.43914	-0.869182	0.261553	-0.709298	-1.36229	-0.0451487	-0.772052		10	10	10	NaN	NaN	NaN	NaN	0	NaN	160300000000	799	334	36483.1	14	0	O88989	O88989	Malate dehydrogenase, cytoplasmic	Mdh1	Mdh1	Malate dehydrogenase, cytoplasmic
0.428152	0.413037	0.877763	-1.27831	0.575433	-2.08463	0.331684	0.065734	0.671131		5	5	5	NaN	NaN	NaN	NaN	0	NaN	1139700000	28	338	38248.5	18	0	O88994	O88994	Mitochondrial amidoxime reducing component 2	Marc2	Marc2	Mitochondrial amidoxime reducing component 2
-0.333347	0.370265	-0.362016	-0.92585	1.32319	-1.13847	-0.969495	1.6114	0.424313		5	5	4	NaN	NaN	NaN	NaN	0	NaN	3607000000	65	484	53845.1	18	0	O89046	O89046	Coronin-1B	Coro1b	Coro1b	Coronin-1B
0.794858	1.54849	1.12167	-1.22253	0.376796	-0.926334	-0.961731	-0.47817	-0.253048		11	11	10	NaN	NaN	NaN	NaN	0	NaN	3941800000	107	499	54520.5	24	0	O89049	O89049	Thioredoxin reductase 1, cytoplasmic	Txnrd1	Txnrd1	Thioredoxin reductase 1, cytoplasmic
-0.296925	-0.998349	-1.37158	1.24456	-0.395248	1.751	0.436467	-0.14115	-0.228771		4	4	4	41	41	41	NaN	0	NaN	13609000000	166	134	15355.1	6	0	P00173	P00173	Cytochrome b5	Cyb5a	Cyb5a	Cytochrome b5
0.404096	0.469961	0.831526	-1.77194	-0.758994	-1.24571	0.304202	0.842503	0.924353		13	13	13	NaN	NaN	NaN	NaN	0	NaN	6329500000	168	678	76962.9	35	0	P00388	P00388	NADPH--cytochrome P450 reductase	Por	Por	NADPH--cytochrome P450 reductase
-0.442532	0.0685077	1.08483	-1.08842	0.884134	-1.66697	-0.50185	1.18043	0.48187		5	5	5	NaN	NaN	NaN	NaN	0	NaN	27372000000	316	227	25928.3	8	0	P00406	P00406	Cytochrome c oxidase subunit 2	Mtco2	Mtco2	Cytochrome c oxidase subunit 2
0.777747	0.651297	-2.53885	0.108364	0.444653	0.0177935	-0.201824	0.359489	0.381333		25	25	25	NaN	NaN	NaN	NaN	0	NaN	173060000000	1403	430	47314.3	26	0	P00507	P00507	Aspartate aminotransferase, mitochondrial	Got2	Got2	Aspartate aminotransferase, mitochondrial
0.200138	1.76812	0.563333	-1.48809	-0.0675223	-1.17976	0.208081	0.654444	-0.658739		7	6	6	NaN	NaN	NaN	NaN	0	NaN	3715700000	85	381	43045	20	0	P00564	P00564	Creatine kinase M-type	Ckm	Ckm	Creatine kinase M-type
NaN	NaN	NaN	NaN	0.0725661	-1.34169	-0.548863	1.25599	0.561999		4	4	4	NaN	NaN	NaN	NaN	0	NaN	269620000	16	148	16673.5	6.5	0	P00697;Q05820	P00697;Q05820	Lysozyme C-1;Putative lysozyme C-2	Lyz1;Lyz2	Lyz1;Lyz2	Lysozyme C-1;Putative lysozyme C-2
-0.855894	-1.3792	-0.335659	0.398612	0.986655	1.69372	-0.595667	0.711873	-0.624442		7	7	7	NaN	NaN	NaN	NaN	0	NaN	1631400000	54	339	37470	19	0	P00787	P00787	Cathepsin B;Cathepsin B light chain;Cathepsin B heavy chain	Ctsb	Ctsb	Cathepsin B
-0.996543	-0.904559	-0.79059	0.043492	2.14292	0.630493	-0.587842	0.475802	-0.0131731		9	9	9	NaN	NaN	NaN	NaN	0	NaN	3276200000	94	477	51981.6	20	0	P01015	P01015	Angiotensinogen;Angiotensin-1;Angiotensin-2;Angiotensin-3;Angiotensin-4;Angiotensin 1-9;Angiotensin 1-7;Angiotensin 1-5;Angiotensin 1-4	Agt	Agt	Angiotensinogen
-0.969775	-1.17298	-1.01903	-0.276693	1.71186	0.577979	-0.196088	1.09755	0.24718		57	57	51	NaN	NaN	NaN	NaN	0	NaN	75123000000	1041	1663	186460	103	0	P01026	P01026	Complement C3;Complement C3 beta chain;C3-beta-c;Complement C3 alpha chain;C3a anaphylatoxin;Acylation stimulating protein;Complement C3b alpha chain;Complement C3c alpha chain fragment 1;Complement C3dg fragment;Complement C3g fragment;Complement C3d fragment;Complement C3f fragment;Complement C3c alpha chain fragment 2	C3	C3	Complement C3
0.928947	0.147082	-0.0621743	0.90978	-1.95745	1.26883	-0.809207	0.00714621	-0.432963		4	4	4	NaN	NaN	NaN	NaN	0	NaN	4782600000	57	98	11195.8	6	0	P01041	P01041	Cystatin-B	Cstb	Cstb	Cystatin-B
-1.26733	-1.21241	NaN	NaN	1.42515	0.770344	-0.0350309	0.511249	-0.191973		14	4	4	NaN	NaN	NaN	NaN	0	NaN	2102000000	41	430	47775.2	22	0	P01048	P01048	T-kininogen 1;T-kininogen 1 heavy chain;T-kinin;T-kininogen 1 light chain	Map1	Map1	T-kininogen 1
0.0750878	-0.815941	-0.896214	1.83751	-0.142789	1.10702	0.568582	-1.06374	-0.66952		6	6	6	NaN	NaN	NaN	NaN	0	NaN	58570000000	581	161	18172.2	8	0	P01830	P01830	Thy-1 membrane glycoprotein	Thy1	Thy1	Thy-1 membrane glycoprotein
-1.37776	-1.40553	NaN	-0.159772	1.31199	0.760788	-0.0505774	0.892899	0.0279636		4	4	1	NaN	NaN	NaN	NaN	0	NaN	8390000000	96	106	11600.8	4	0	P01835	P01835	Ig kappa chain C region, B allele			Ig kappa chain C region, B allele
NaN	NaN	NaN	NaN	NaN	NaN	-0.707107	0.707107	NaN		4	1	1	NaN	NaN	NaN	NaN	0	NaN	80182000	11	106	11732	5	0	P01836	P01836	Ig kappa chain C region, A allele			Ig kappa chain C region, A allele
-1.13178	-1.16729	0.0698324	0.202427	1.69841	1.13914	-0.551796	0.49918	-0.758124		19	19	17	NaN	NaN	93	NaN	0	NaN	1142600000000	4137	142	15328.5	9	0	P01946	P01946	Hemoglobin subunit alpha-1/2	Hba1	Hba1	Hemoglobin subunit alpha-1/2
-0.949925	-1.07878	-0.242975	0.155591	1.73932	1.26001	-0.611504	0.507135	-0.778876		21	21	6	NaN	NaN	NaN	NaN	0	NaN	1728600000000	5826	147	15979.4	11	0	P02091;CON__Q3SX09;CON__P02070	P02091	Hemoglobin subunit beta-1	Hbb	Hbb	Hemoglobin subunit beta-1
-1.31777	-1.21384	NaN	1.54939	NaN	0.348083	0.179598	0.484905	-0.0303657		6	6	6	NaN	NaN	NaN	NaN	0	NaN	2218000000	38	115	11692	5	0	P02401	P02401	60S acidic ribosomal protein P2	Rplp2	Rplp2	60S acidic ribosomal protein P2
-0.0412107	-1.2086	-0.987862	-1.09895	NaN	0.596796	1.14549	0.341788	1.25255		4	4	4	NaN	NaN	NaN	NaN	0	NaN	1635800000	39	1453	137953	78	0	P02454	P02454	Collagen alpha-1(I) chain	Col1a1	Col1a1	Collagen alpha-1(I) chain
NaN	-1.78588	NaN	NaN	NaN	0.517197	0.357343	0.465156	0.446183		2	2	2	NaN	NaN	NaN	NaN	NaN	NaN	333380000	10	1938.5	223194	101.5	0	P02563;Q29RW1	P02563;Q29RW1	Myosin-6;Myosin-4	Myh6;Myh4	Myh6;Myh4	Myosin-6;Myosin-4
-0.834562	-0.99642	-0.729091	0.462192	NaN	-0.109053	1.85123	0.35571	NaN		2	2	2	NaN	NaN	NaN	NaN	0	NaN	430930000	20	110	11925.5	8	0	P02625	P02625	Parvalbumin alpha	Pvalb	Pvalb	Parvalbumin alpha
-0.584073	-0.925988	-0.336847	-0.724526	2.36175	0.604727	-0.14655	0.164806	-0.413298		6	6	6	NaN	NaN	NaN	NaN	0	NaN	6955500000	133	312	35753.5	16	0	P02650	P02650	Apolipoprotein E	Apoe	Apoe	Apolipoprotein E
-0.982659	-1.21722	-1.26771	0.157427	1.44283	0.703068	-0.238196	1.0915	0.31096		11	11	11	NaN	NaN	NaN	NaN	0	NaN	2762600000	73	391	44456.4	24	0	P02651	P02651	Apolipoprotein A-IV	Apoa4	Apoa4	Apolipoprotein A-IV
-1.14395	-1.13605	-1.04236	0.1964	1.58161	0.599495	-0.255266	1.16108	0.039036		16	16	16	NaN	NaN	NaN	NaN	0	NaN	22279000000	291	445	50632.7	25	0	P02680	P02680	Fibrinogen gamma chain	Fgg	Fgg	Fibrinogen gamma chain
0.423707	0.0683699	-1.79685	1.33107	-0.527927	0.763581	1.0237	-0.841852	-0.44379		11	11	11	NaN	NaN	NaN	NaN	0	NaN	389850000000	1265	195	21502.2	11	0	P02688	P02688	Myelin basic protein	Mbp	Mbp	Myelin basic protein
-0.785188	NaN	NaN	1.45673	NaN	0.610317	-0.824461	-0.457393	NaN		4	4	4	NaN	NaN	NaN	NaN	0	NaN	592670000	9	135	15834.1	9	0	P02696	P02696	Retinol-binding protein 1	Rbp1	Rbp1	Retinol-binding protein 1
-0.889333	-1.04059	-1.39723	-0.0188758	1.57587	0.935429	-0.0543954	0.901195	-0.0120725		48	48	46	NaN	NaN	NaN	NaN	0	NaN	862550000000	3932	608	68730.8	38	0	P02770	P02770	Serum albumin	Alb	Alb	Serum albumin
0.48941	-0.0809954	1.533	-1.1658	NaN	-1.6469	0.302794	0.0853069	0.483188		3	3	3	NaN	NaN	NaN	NaN	0	NaN	1137000000	39	318	36145.3	6	0	P03889	P03889	NADH-ubiquinone oxidoreductase chain 1	Mtnd1	Mtnd1	NADH-ubiquinone oxidoreductase chain 1
0.461912	0.609991	0.983563	-0.256853	-2.33561	0.525357	-0.537724	-0.0493939	0.59876		11	11	11	NaN	NaN	NaN	NaN	0	NaN	4787500000	145	354	40261.6	24	0	P03994	P03994	Hyaluronan and proteoglycan link protein 1	Hapln1	Hapln1	Hyaluronan and proteoglycan link protein 1
-0.665738	-0.478569	-0.780887	0.0850532	2.2414	0.736152	-0.716766	0.310599	-0.731245		13	13	13	NaN	NaN	NaN	NaN	0	NaN	5299900000	149	201	22155.3	14	0	P04041	P04041	Glutathione peroxidase 1	Gpx1	Gpx1	Glutathione peroxidase 1
0.196016	-0.36575	-0.348936	1.80303	NaN	-0.434304	1.07754	-1.31565	-0.611947		4	4	4	NaN	NaN	NaN	NaN	0	NaN	10806000000	157	146	16264.9	6	0	P04166	P04166	Cytochrome b5 type B	Cyb5b	Cyb5b	Cytochrome b5 type B
0.503005	0.696637	1.23499	-0.851522	-0.36531	-1.29668	-1.42949	0.84223	0.666143		14	14	14	NaN	NaN	NaN	NaN	0	NaN	5593800000	163	439	48332.6	21	0	P04182	P04182	Ornithine aminotransferase, mitochondrial	Oat	Oat	Ornithine aminotransferase, mitochondrial
0.24247	-0.439602	0.728341	0.45293	1.9973	-0.826174	-0.00291625	-0.966041	-1.18631		4	4	4	NaN	NaN	NaN	NaN	0	NaN	2519000000	35	278	31088	10	0	P04218	P04218	OX-2 membrane glycoprotein	Cd200	Cd200	OX-2 membrane glycoprotein
-0.427718	0.234226	0.441598	-1.52713	2.01616	-1.0082	-0.0119615	-0.0967166	0.379733		7	7	7	NaN	NaN	NaN	NaN	0	NaN	2768200000	75	320	34212.3	18	0	P04256	P04256	Heterogeneous nuclear ribonucleoprotein A1;Heterogeneous nuclear ribonucleoprotein A1, N-terminally processed	Hnrnpa1	Hnrnpa1	Heterogeneous nuclear ribonucleoprotein A1
-1.13448	-1.27449	-0.940844	-0.141985	1.50558	0.808993	-0.165063	1.07975	0.262539		20	20	20	NaN	NaN	NaN	NaN	0	NaN	12845000000	297	476	53544.5	27	0	P04276	P04276	Vitamin D-binding protein	Gc	Gc	Vitamin D-binding protein
-0.679401	-0.288925	-0.285364	0.668996	0.829388	-0.00599786	-0.781045	1.92661	-1.38426		5	5	5	NaN	NaN	NaN	NaN	0	NaN	47041000000	553	92	10744	3	0	P04631	P04631	Protein S100-B	S100b	S100b	Protein S100-B
0.666989	0.643795	-2.60392	0.213194	0.343119	0.314409	0.0150384	0.117018	0.290357		17	17	17	NaN	NaN	NaN	NaN	0	NaN	213120000000	1152	338	35683.6	21	0	P04636	P04636	Malate dehydrogenase, mitochondrial	Mdh2	Mdh2	Malate dehydrogenase, mitochondrial
-1.35692	-1.0344	-0.836312	-0.14362	1.67024	0.521281	0.065291	1.1412	-0.0267529		9	9	9	44	44	44	NaN	0	NaN	12329000000	243	259	30062.1	13	0	P04639	P04639	Apolipoprotein A-I;Proapolipoprotein A-I	Apoa1	Apoa1	Apolipoprotein A-I
0.572307	-0.209188	0.554019	-0.0188479	1.62146	-0.234676	-2.10453	0.21947	-0.400013		10	10	10	NaN	NaN	NaN	NaN	0	NaN	28327000000	270	332	36450.5	18	0	P04642;P19629	P04642	L-lactate dehydrogenase A chain	Ldha	Ldha	L-lactate dehydrogenase A chain
-0.773732	0.473055	0.687373	-1.17578	NaN	-1.0505	-0.493862	0.811258	1.52218		5	5	5	NaN	NaN	NaN	NaN	0	NaN	2206900000	22	135	15510	5	0	P04644	P04644	40S ribosomal protein S17	Rps17	Rps17	40S ribosomal protein S17
-0.252712	-0.344015	-1.62465	1.46803	-0.0552	1.27302	0.77598	-0.501738	-0.738704		9	6	5	NaN	18	13	NaN	0	NaN	1593500000	47	284	32680.6	16	0	P04692	P04692	Tropomyosin alpha-1 chain	Tpm1	Tpm1	Tropomyosin alpha-1 chain
-0.367912	-0.343133	-0.645155	-1.24598	2.33346	-0.21609	0.0645981	0.521569	-0.101355		16	16	16	37	37	37	NaN	0	NaN	22139000000	405	527	59757.2	29	0	P04762	P04762	Catalase	Cat	Cat	Catalase
0.714336	1.78388	0.151188	-1.15934	-1.23118	-0.400201	0.786788	0.144829	-0.79031		18	17	16	NaN	NaN	NaN	NaN	0	NaN	120980000000	1083	434	47127.9	22	0	P04764	P04764	Alpha-enolase	Eno1	Eno1	Alpha-enolase
-0.544841	-0.729489	-1.08126	1.88986	0.249538	1.22442	0.121621	-0.236482	-0.893365		16	16	16	32	32	32	NaN	0	NaN	12607000000	357	509	56951.3	32	0	P04785	P04785	Protein disulfide-isomerase	P4hb	P4hb	Protein disulfide-isomerase
1.01888	0.796321	-2.3856	-0.387072	0.080903	-0.218281	0.283014	0.513168	0.298673		19	19	19	NaN	NaN	NaN	NaN	0	NaN	379730000000	2147	333	35828	16	0	P04797;Q9ESV6	P04797	Glyceraldehyde-3-phosphate dehydrogenase	Gapdh	Gapdh	Glyceraldehyde-3-phosphate dehydrogenase
-0.748507	0.162354	-0.00291805	-1.23228	-1.43318	0.628454	0.796038	0.160801	1.66924		15	15	11	51	51	NaN	NaN	0	NaN	72141000000	888	355	40499	17	0	P04897;P29348	P04897	Guanine nucleotide-binding protein G(i) subunit alpha-2	Gnai2	Gnai2	Guanine nucleotide-binding protein G(i) subunit alpha-2
0.411282	0.141254	0.803805	1.60851	-0.0463376	0.27531	-1.89177	-0.459881	-0.842178		6	6	5	NaN	NaN	19	NaN	0	NaN	11698000000	125	221	25333.4	10.5	0	P04904;P46418;P04903;P00502	P04904;P46418	Glutathione S-transferase alpha-3;Glutathione S-transferase alpha-5	Gsta3;Gsta5	Gsta3;Gsta5	Glutathione S-transferase alpha-3;Glutathione S-transferase alpha-5
0.519606	1.6991	1.03512	-0.734536	-0.80792	-1.26583	-0.922606	0.315966	0.161091		12	9	8	NaN	NaN	NaN	NaN	0	NaN	10070000000	180	218	25914	16	0	P04905	P04905	Glutathione S-transferase Mu 1	Gstm1	Gstm1	Glutathione S-transferase Mu 1
1.16255	0.898211	0.977998	0.293991	0.23282	-0.160162	-1.88849	-0.789979	-0.726938		9	9	9	NaN	NaN	NaN	NaN	0	NaN	68147000000	549	210	23438.9	12	0	P04906	P04906	Glutathione S-transferase P	Gstp1	Gstp1	Glutathione S-transferase P
-1.12738	-1.19573	-1.08608	-0.373168	1.38778	0.56886	0.0170378	1.12221	0.686469		38	38	38	NaN	NaN	NaN	NaN	0	NaN	7082500000	187	2477	272511	110	0	P04937	P04937	Fibronectin;Anastellin	Fn1	Fn1	Fibronectin
1.4274	0.757422	1.45171	-0.678082	-0.189166	0.00493922	-0.549483	-1.04487	-1.17987		21	16	16	NaN	NaN	NaN	NaN	0	NaN	133360000000	1027	364	39351.9	23	0	P05065	P05065	Fructose-bisphosphate aldolase A	Aldoa	Aldoa	Fructose-bisphosphate aldolase A
0.674451	-0.0518466	0.0832787	-0.848816	1.47169	-0.979536	-1.66131	0.84165	0.470436		31	31	31	NaN	NaN	NaN	NaN	0	NaN	36944000000	567	858	95284	45	0	P05197	P05197	Elongation factor 2	Eef2	Eef2	Elongation factor 2
-0.0981068	1.24044	0.355276	-1.07014	-0.37943	-1.67549	1.48514	0.152554	-0.0102483		7	7	7	NaN	NaN	NaN	NaN	0	NaN	9751700000	166	353	40829.7	18	0	P05369	P05369	Farnesyl pyrophosphate synthase	Fdps	Fdps	Farnesyl pyrophosphate synthase
-0.0411026	0.422185	0.111152	-1.67454	1.10464	-1.46442	-0.15406	1.14529	0.550857		21	21	21	NaN	NaN	NaN	NaN	0	NaN	20434000000	453	515	59375.7	31	0	P05370	P05370	Glucose-6-phosphate 1-dehydrogenase	G6pdx	G6pdx	Glucose-6-phosphate 1-dehydrogenase
-1.2758	-1.35625	-0.981534	0.869538	0.922731	1.16941	-0.0521307	0.766693	-0.0626595		6	6	6	NaN	NaN	NaN	NaN	0	NaN	1639200000	48	447	51375.3	20	0	P05371	P05371	Clusterin;Clusterin beta chain;Clusterin alpha chain	Clu	Clu	Clusterin
-1.41664	NaN	1.10743	NaN	NaN	-0.339516	-0.76945	0.545085	0.873087		5	5	5	NaN	NaN	NaN	NaN	0	NaN	990940000	17	260	30329.3	13	0	P05426	P05426	60S ribosomal protein L7	Rpl7	Rpl7	60S ribosomal protein L7
-0.95122	-1.04996	NaN	-0.0120475	NaN	NaN	-0.241491	0.684413	1.57031		2	2	2	NaN	NaN	NaN	NaN	0	NaN	699750000	25	514	56845	5	0	P05503	P05503	Cytochrome c oxidase subunit 1	Mtco1	Mtco1	Cytochrome c oxidase subunit 1
-1.01432	-1.17745	-1.1634	0.264784	1.54783	1.11506	-0.204749	0.690448	-0.0581992		19	19	14	NaN	NaN	NaN	NaN	0	NaN	33271000000	392	413	46277.2	23	0	P05544;P09005	P05544	Serine protease inhibitor A3L	Serpina3l	Serpina3l	Serine protease inhibitor A3L
-1.03279	-1.02767	-1.32711	0.432314	1.4842	1.13358	-0.189503	0.628522	-0.101534		15	10	10	NaN	NaN	NaN	NaN	0	NaN	14936000000	241	416	46561.6	23	0	P05545	P05545	Serine protease inhibitor A3K	Serpina3k	Serpina3k	Serine protease inhibitor A3K
-0.60052	0.732736	0.826091	-1.98555	0.645302	-1.126	0.642019	0.377131	0.488793		12	6	5	26	NaN	NaN	NaN	0	NaN	948740000	44	672	76791.9	33	0	P05696	P05696	Protein kinase C alpha type	Prkca	Prkca	Protein kinase C alpha type
0.66103	0.636786	0.976829	-1.34803	0.946089	-0.963904	-1.46279	0.643575	-0.0895849		34	34	34	NaN	NaN	NaN	NaN	0	NaN	112990000000	1269	918	102408	47	0	P05708;P27881;P27926	P05708	Hexokinase-1	Hk1	Hk1	Hexokinase-1
0.792591	-0.983917	0.362118	-1.10378	2.04499	-0.389294	-0.735012	0.306488	-0.294178		13	13	13	NaN	NaN	NaN	NaN	0	NaN	27295000000	378	212	23535.5	14	0	P05712	P05712	Ras-related protein Rab-2A	Rab2a	Rab2a	Ras-related protein Rab-2A
0.782036	0.562746	0.316689	-0.0901627	NaN	-1.76937	-0.284194	-0.906822	1.38908		7	5	5	39	NaN	NaN	NaN	0	NaN	1683000000	38	218	24408.7	14	0	P05714	P05714	Ras-related protein Rab-4A	Rab4a	Rab4a	Ras-related protein Rab-4A
-0.85733	NaN	NaN	NaN	0.879874	NaN	NaN	0.852021	-0.874566		2	2	2	NaN	NaN	NaN	NaN	0	NaN	1271100000	30	101	11776.4	6	0	P05942	P05942	Protein S100-A4	S100a4	S100a4	Protein S100-A4
-0.360464	-1.32236	-0.61084	2.08721	0.687074	0.453684	-0.730351	0.180636	-0.384597		3	3	3	NaN	NaN	NaN	NaN	0	NaN	2370700000	97	95	11075	4	0	P05943	P05943	Protein S100-A10	S100a10	S100a10	Protein S100-A10
1.47641	1.53234	-0.48939	-0.182399	-0.27999	-1.621	-0.654103	0.253476	-0.0353385		6	6	6	NaN	NaN	NaN	NaN	0	NaN	2060100000	105	274	30946.6	15	0	P05982	P05982	NAD(P)H dehydrogenase [quinone] 1	Nqo1	Nqo1	NAD(P)H dehydrogenase [quinone] 1
0.618713	0.712252	-0.589031	-2.22285	1.01521	0.452817	-0.616224	0.249098	0.380016		9	9	9	37	37	37	NaN	0	NaN	2288900000	93	330	36031.6	17	0	P06214	P06214	Delta-aminolevulinic acid dehydratase	Alad	Alad	Delta-aminolevulinic acid dehydratase
-1.2301	-0.975975	-1.40806	0.530976	1.44372	0.949553	0.0611898	0.517302	0.111397		18	18	17	16	16	NaN	NaN	0	NaN	3204200000	84	1472	163785	77	0	P06238	P06238	Alpha-2-macroglobulin	A2m	A2m	Alpha-2-macroglobulin
-1.09887	-1.11246	-1.13953	0.0413207	1.32308	0.961075	-0.0645954	1.2458	-0.155818		19	19	19	NaN	NaN	NaN	NaN	0	NaN	12850000000	191	782	86685.9	35	0	P06399;CON__P02672	P06399	Fibrinogen alpha chain;Fibrinopeptide A;Fibrinogen alpha chain	Fga	Fga	Fibrinogen alpha chain
0.575276	-0.873302	-0.796881	1.40368	0.117974	0.96473	0.689355	-1.63888	-0.441955		36	21	21	NaN	NaN	NaN	NaN	0	NaN	104280000000	1168	1023	113054	46	0	P06685	P06685	Sodium/potassium-transporting ATPase subunit alpha-1	Atp1a1	Atp1a1	Sodium/potassium-transporting ATPase subunit alpha-1
0.45763	0.00328336	-1.80952	1.09125	-1.00801	1.1703	0.767725	-0.585368	-0.0872938		50	50	32	NaN	NaN	NaN	NaN	0	NaN	1003000000000	5231	1020	112217	47	0	P06686	P06686	Sodium/potassium-transporting ATPase subunit alpha-2	Atp1a2	Atp1a2	Sodium/potassium-transporting ATPase subunit alpha-2
0.458199	0.32144	-2.51117	0.692484	-0.22805	0.697227	0.598014	-0.064521	0.0363747		47	30	30	NaN	NaN	NaN	NaN	0	NaN	398700000000	2848	1013	111692	44	0	P06687;P54708;P09626	P06687	Sodium/potassium-transporting ATPase subunit alpha-3	Atp1a3	Atp1a3	Sodium/potassium-transporting ATPase subunit alpha-3
-0.418462	-0.842905	-0.99921	2.06481	-0.0479269	1.1134	0.127728	-0.278731	-0.718712		21	19	19	NaN	NaN	NaN	NaN	0	NaN	38558000000	739	654	72347	30	0	P06761	P06761	78 kDa glucose-regulated protein	Hspa5	Hspa5	78 kDa glucose-regulated protein
NaN	NaN	NaN	NaN	0.919915	-1.04727	-0.342828	1.19136	-0.72118		4	4	4	NaN	NaN	NaN	NaN	0	NaN	362120000	14	289	33005.6	14	0	P06762	P06762	Heme oxygenase 1	Hmox1	Hmox1	Heme oxygenase 1
NaN	NaN	NaN	-1.12193	1.4652	NaN	-0.712543	0.0883126	0.280957		3	3	3	NaN	NaN	NaN	NaN	0	NaN	711610000	18	105	11286.5	5	0	P06765	P06765	Platelet factor 4	Pf4	Pf4	Platelet factor 4
-0.905672	-1.33243	-1.26976	0.0495902	1.30208	1.08084	-0.0969283	0.924881	0.247404		11	11	11	NaN	NaN	NaN	NaN	0	NaN	13638000000	174	347	38563.2	20	0	P06866	P06866	Haptoglobin;Haptoglobin alpha chain;Haptoglobin beta chain	Hp	Hp	Haptoglobin
-0.363788	-1.41046	0.645744	1.21211	0.16486	1.07712	-0.904446	-1.18474	0.763588		8	8	8	NaN	NaN	NaN	NaN	0	NaN	93316000000	440	248	27570.7	9	0	P06907	P06907	Myelin protein P0	Mpz	Mpz	Myelin protein P0
-1.10656	-0.972751	-1.1005	0.140605	1.76052	0.281381	-0.28911	1.14759	0.138828		19	19	19	NaN	NaN	NaN	NaN	0	NaN	6246700000	148	346	38829.5	22	0	P07150	P07150	Annexin A1	Anxa1	Anxa1	Annexin A1
-0.805179	-1.27953	0.131959	-1.39384	0.658399	-0.172474	0.819394	0.50283	1.53844		13	13	13	NaN	NaN	NaN	NaN	0	NaN	3735200000	152	605	68304.1	37	0	P07153	P07153	Dolichyl-diphosphooligosaccharide--protein glycosyltransferase subunit 1	Rpn1	Rpn1	Dolichyl-diphosphooligosaccharide--protein glycosyltransferase subunit 1
0.103299	0.211777	-0.0913762	1.9046	-0.868926	1.10797	-0.346053	-0.72476	-1.29653		19	19	16	NaN	NaN	NaN	NaN	0	NaN	89133000000	1084	434	47140.5	20	0	P07323	P07323	Gamma-enolase	Eno2	Eno2	Gamma-enolase
0.825325	0.647483	-2.32991	1.04064	-0.0414457	0.337872	0.189911	-0.257774	-0.4121		21	21	20	68	68	68	NaN	0	NaN	466630000000	3329	381	42725.3	18	0	P07335	P07335	Creatine kinase B-type	Ckb	Ckb	Creatine kinase B-type
0.312158	-0.490985	-2.18938	1.35489	0.912283	0.146057	0.296457	-0.0430689	-0.298413		10	10	10	NaN	NaN	NaN	NaN	0	NaN	243990000000	895	304	35201.6	12	0	P07340	P07340	Sodium/potassium-transporting ATPase subunit beta-1	Atp1b1	Atp1b1	Sodium/potassium-transporting ATPase subunit beta-1
NaN	NaN	NaN	0.376447	NaN	1.5973	-0.728769	-0.602067	-0.642911		3	3	3	NaN	NaN	NaN	NaN	NaN	NaN	237710000	3	133	14774.7	10	0	P07483	P07483	Fatty acid-binding protein, heart	Fabp3	Fabp3	Fatty acid-binding protein, heart
0.0994046	0.0335013	-0.823757	1.34919	-0.0739437	1.7638	-0.608646	-0.37471	-1.36484		5	5	5	NaN	NaN	NaN	NaN	0	NaN	7215300000	79	154	15911.7	9	0	P07632	P07632	Superoxide dismutase [Cu-Zn]	Sod1	Sod1	Superoxide dismutase [Cu-Zn]
0.517452	0.65352	-0.108349	-1.20825	NaN	-0.242934	-1.61582	1.28049	0.723889		8	8	8	NaN	NaN	NaN	NaN	0	NaN	1645300000	46	541	58626.2	29	0	P07633	P07633	Propionyl-CoA carboxylase beta chain, mitochondrial	Pccb	Pccb	Propionyl-CoA carboxylase beta chain, mitochondrial
-0.0133818	-0.683393	-0.95387	1.81711	NaN	-0.940656	-0.466037	0.145812	1.09442		5	5	5	NaN	NaN	NaN	NaN	0	NaN	360310000	19	455	52581.6	28	0	P07687	P07687	Epoxide hydrolase 1	Ephx1	Ephx1	Epoxide hydrolase 1
-1.48143	-0.948276	0.283315	1.42808	0.139917	0.497175	-1.2666	0.614335	0.733483		12	12	12	27	27	27	NaN	0	NaN	85976000000	466	626	69352.9	25	0	P07722	P07722	Myelin-associated glycoprotein	Mag	Mag	Myelin-associated glycoprotein
-0.646458	-0.401388	0.0249347	-0.873082	NaN	NaN	-0.885355	1.33462	1.44672		3	3	3	NaN	NaN	NaN	NaN	0	NaN	433100000	13	457	52616.9	18	0	P07727	P07727	Glycine receptor subunit alpha-1	Glra1	Glra1	Glycine receptor subunit alpha-1
0.738554	0.468685	0.876301	0.25612	-2.4223	-0.00740481	0.294597	-0.56382	0.359271		5	5	5	NaN	NaN	NaN	NaN	0	NaN	30083000000	265	307	33310.7	12	0	P07825	P07825	Synaptophysin	Syp	Syp	Synaptophysin
0.271059	0.632732	0.475716	-0.450588	-1.5376	-1.65561	0.321834	0.944427	0.998031		14	14	14	NaN	NaN	NaN	NaN	0	NaN	2179900000	96	661	74678.8	32	0	P07872	P07872	Peroxisomal acyl-coenzyme A oxidase 1;Peroxisomal acyl-CoA oxidase 1, A chain;Peroxisomal acyl-CoA oxidase 1, B chain;Peroxisomal acyl-CoA oxidase 1, C chain	Acox1	Acox1	Peroxisomal acyl-coenzyme A oxidase 1
0.192037	1.54031	0.554635	-0.569419	0.201539	-1.95726	-0.614489	0.824652	-0.172012		8	8	8	NaN	NaN	NaN	NaN	0	NaN	27882000000	285	222	24674.1	11	0	P07895	P07895	Superoxide dismutase [Mn], mitochondrial	Sod2	Sod2	Superoxide dismutase [Mn], mitochondrial
0.179335	-0.409144	-0.511998	1.37974	-0.0718664	1.89355	-0.719634	-0.791608	-0.948373		10	10	10	NaN	NaN	NaN	NaN	0	NaN	2120600000	84	2124	221118	54	0	P07897	P07897	Aggrecan core protein	Acan	Acan	Aggrecan core protein
-0.579137	-0.4841	-1.34937	1.03306	0.57408	1.79872	-0.00129289	-0.00339459	-0.98857		3	3	3	NaN	NaN	NaN	NaN	0	NaN	1646800000	43	226	23603.3	13	0	P07936	P07936	Neuromodulin	Gap43	Gap43	Neuromodulin
0.172198	0.208363	0.220301	1.33431	1.26669	0.292594	-1.6336	-0.993149	-0.867703		11	11	11	NaN	NaN	NaN	NaN	0	NaN	19531000000	233	316	35797.3	19	0	P07943	P07943	Aldose reductase	Akr1b1	Akr1b1	Aldose reductase
0.945092	0.910127	1.36379	-0.98057	-0.127639	-1.08369	-1.47128	0.260941	0.183236		15	15	10	NaN	NaN	NaN	NaN	0	NaN	26368000000	397	218	25680.7	16	0	P08009	P08009	Glutathione S-transferase Yb-3	Gstm3	Gstm3	Glutathione S-transferase Yb-3
-0.52553	-1.04012	-0.548007	1.89639	NaN	-0.114778	NaN	0.747855	-0.415805		6	2	2	NaN	NaN	NaN	NaN	NaN	NaN	177140000	10	218	25702.6	16	0	P08010	P08010	Glutathione S-transferase Mu 2	Gstm2	Gstm2	Glutathione S-transferase Mu 2
0.639153	0.231129	0.903883	-1.42069	-1.73818	-0.446103	0.706125	0.143193	0.981486		10	10	10	NaN	NaN	NaN	NaN	0	NaN	18760000000	262	382	43031.4	18	0	P08050	P08050	Gap junction alpha-1 protein	Gja1	Gja1	Gap junction alpha-1 protein
-0.626071	-0.41871	-0.568914	2.13469	NaN	0.000484944	0.737286	-0.300507	-0.958259		2	2	2	6	6	6	NaN	NaN	NaN	1089400000	28	248	26980.5	7	0	P08081	P08081	Clathrin light chain A	Clta	Clta	Clathrin light chain A
-0.615215	-0.0113346	0.414064	1.39233	-1.12902	1.30067	0.367478	-0.176698	-1.54228		3	3	3	17	17	17	NaN	0	NaN	886960000	33	229	25117.4	9	0	P08082	P08082	Clathrin light chain B	Cltb	Cltb	Clathrin light chain B
-0.122967	NaN	NaN	1.97147	NaN	-0.0913633	-0.576047	-0.416571	-0.764518		6	6	6	NaN	NaN	NaN	NaN	0	NaN	248440000	8	524	57659.4	29	0	P08289	P08289	Alkaline phosphatase, tissue-nonspecific isozyme	Alpl	Alpl	Alkaline phosphatase, tissue-nonspecific isozyme
-1.34815	-1.61034	0.380958	-0.155187	1.47854	0.983246	-0.309276	0.33052	0.249692		13	8	7	NaN	26	24	NaN	0	NaN	4473500000	85	542	60401.8	27	0	P08413	P08413	Calcium/calmodulin-dependent protein kinase type II subunit beta	Camk2b	Camk2b	Calcium/calmodulin-dependent protein kinase type II subunit beta
-1.00558	-0.735637	0.132037	1.47683	NaN	1.46608	-0.854299	-0.596806	0.117376		5	5	5	NaN	NaN	NaN	NaN	0	NaN	961990000	39	324	35661.2	12	0	P08460	P08460	Nidogen-1	Nid1	Nid1	Nidogen-1
0.758755	1.51598	0.705047	-0.485192	0.548798	-1.8865	-0.168204	-0.403527	-0.585158		18	18	18	NaN	NaN	NaN	NaN	0	NaN	41103000000	566	632	67165.8	35	0	P08461	P08461	Dihydrolipoyllysine-residue acetyltransferase component of pyruvate dehydrogenase complex, mitochondrial	Dlat	Dlat	Dihydrolipoyllysine-residue acetyltransferase component of pyruvate dehydrogenase complex, mitochondrial
1.11158	0.0684219	0.989437	NaN	0.189064	-0.00397693	-1.11238	-1.79072	0.54857		7	7	7	NaN	NaN	NaN	NaN	0	NaN	1389400000	17	421	46555.4	20	0	P08503	P08503	Medium-chain specific acyl-CoA dehydrogenase, mitochondrial	Acadm	Acadm	Medium-chain specific acyl-CoA dehydrogenase, mitochondrial
-0.608998	-1.24013	-0.726959	0.488044	1.72053	0.853272	-0.853689	0.831951	-0.464022		6	6	6	11	11	11	NaN	0	NaN	1185100000	69	770	86704.1	35	0	P08592	P08592	Amyloid beta A4 protein;N-APP;Soluble APP-alpha;Soluble APP-beta;C99;Beta-amyloid protein 42;Beta-amyloid protein 40;C83;P3(42);P3(40);C80;Gamma-secretase C-terminal fragment 59;Gamma-secretase C-terminal fragment 57;Gamma-secretase C-terminal fragment 50;C31	App	App	Amyloid beta A4 protein
-1.19773	-0.833022	-0.830352	-0.329717	1.77902	0.708303	-0.476924	1.08141	0.0990097		34	34	30	NaN	NaN	NaN	NaN	0	NaN	5880100000	180	1737	192163	81	0	P08649	P08649	Complement C4;Complement C4 beta chain;Complement C4 alpha chain;C4a anaphylatoxin;Complement C4 gamma chain	C4	C4	Complement C4
-0.187646	-1.14651	-0.891352	0.578168	NaN	-0.592587	1.91086	-0.317558	0.646621		4	4	4	NaN	NaN	NaN	NaN	0	NaN	2543500000	72	262	27201.5	9	0	P08699	P08699	Galectin-3	Lgals3	Lgals3	Galectin-3
0.00537101	-0.0859982	-1.78519	-1.09162	NaN	0.999467	0.182001	0.838252	0.937716		6	3	3	NaN	NaN	NaN	NaN	0	NaN	893750000	22	354	40522.2	15	0	P08753	P08753	Guanine nucleotide-binding protein G(k) subunit alpha	Gnai3	Gnai3	Guanine nucleotide-binding protein G(k) subunit alpha
-1.06139	-1.42925	-1.13767	0.368187	1.3044	0.955334	-0.00235252	0.878172	0.124566		17	17	5	NaN	NaN	16	NaN	0	NaN	9430900000	178	430	47704.1	25	0	P08932	P08932	T-kininogen 2;T-kininogen 2 heavy chain;T-kinin;T-kininogen 2 light chain			T-kininogen 2
NaN	NaN	NaN	-0.410313	1.99896	-0.299958	-0.379666	-0.147511	-0.761515		8	6	6	18	NaN	NaN	NaN	0	NaN	843800000	20	639	70933.3	32	0	P08934	P08934	Kininogen-1;Kininogen-1 heavy chain;Bradykinin;Kininogen-1 light chain	Kng1	Kng1	Kininogen-1
-1.47028	-1.41171	-0.909239	0.341423	1.14621	0.816419	0.225231	0.824313	0.437634		16	16	16	NaN	NaN	NaN	NaN	0	NaN	19427000000	359	418	46651.8	24	0	P09006	P09006	Serine protease inhibitor A3N	Serpina3n	Serpina3n	Serine protease inhibitor A3N
0.158328	0.603742	-0.392169	0.494793	1.47754	-1.9154	0.695285	-0.209687	-0.912438		9	9	9	NaN	NaN	NaN	NaN	0	NaN	1225700000	42	412	46496.3	21	0	P09034	P09034	Argininosuccinate synthase	Ass1	Ass1	Argininosuccinate synthase
0.896165	1.57889	0.740991	-0.15887	-1.88531	-0.562605	0.0804565	-0.259801	-0.429917		30	30	25	NaN	NaN	NaN	NaN	0	NaN	237770000000	2080	363	39283.8	23	0	P09117;P00884	P09117	Fructose-bisphosphate aldolase C	Aldoc	Aldoc	Fructose-bisphosphate aldolase C
1.15468	NaN	NaN	NaN	-0.570759	NaN	NaN	-0.583917	NaN		8	2	2	NaN	NaN	NaN	NaN	0	NaN	399160000	10	318	34813.1	16	0	P09330	P09330	Ribose-phosphate pyrophosphokinase 2	Prps2	Prps2	Ribose-phosphate pyrophosphokinase 2
-0.0496307	1.17918	0.95719	0.587112	-1.56946	-1.5431	-0.385892	0.492697	0.331898		12	12	12	NaN	NaN	NaN	NaN	0	NaN	5243000000	155	381	43095	19	0	P09456;P81377	P09456	cAMP-dependent protein kinase type I-alpha regulatory subunit;cAMP-dependent protein kinase type I-alpha regulatory subunit, N-terminally processed	Prkar1a	Prkar1a	cAMP-dependent protein kinase type I-alpha regulatory subunit
-0.368118	-0.477252	-0.170174	1.53207	-1.55329	1.57706	-0.578847	0.130759	-0.09221		7	4	2	NaN	NaN	NaN	NaN	0	NaN	680710000	54	248	28509.7	15	0	P09495	P09495	Tropomyosin alpha-4 chain	Tpm4	Tpm4	Tropomyosin alpha-4 chain
0.853365	0.421739	0.0711508	-1.34389	0.893737	-1.64051	1.26833	-0.415029	-0.108892		12	12	12	NaN	NaN	NaN	NaN	0	NaN	22514000000	365	207	23503.8	14	0	P09527	P09527	Ras-related protein Rab-7a	Rab7a	Rab7a	Ras-related protein Rab-7a
0.535079	1.19613	-1.84812	-0.747638	-0.4406	-0.284974	-0.307914	0.687291	1.21076		16	16	16	NaN	NaN	NaN	NaN	0	NaN	78353000000	615	373	42267.8	17	0	P09606	P09606	Glutamine synthetase	Glul	Glul	Glutamine synthetase
-0.875833	NaN	NaN	NaN	NaN	NaN	NaN	-0.213764	1.0896		6	3	2	NaN	NaN	NaN	NaN	0	NaN	1020000000	15	850	97483.1	49	0	P09811	P09811	Glycogen phosphorylase, liver form	Pygl	Pygl	Glycogen phosphorylase, liver form
0.76932	0.900615	0.761595	-0.551854	-2.07354	-0.627165	-0.4534	0.606145	0.668281		32	27	26	NaN	NaN	NaN	NaN	0	NaN	48175000000	759	842	97273.4	51	0	P09812	P09812	Glycogen phosphorylase, muscle form	Pygm	Pygm	Glycogen phosphorylase, muscle form
-0.246223	-0.946666	-0.707793	NaN	-1.33062	0.439984	0.122009	1.35185	1.31746		6	6	6	NaN	NaN	NaN	NaN	0	NaN	1582200000	30	297	34458.7	11	0	P09895	P09895	60S ribosomal protein L5	Rpl5	Rpl5	60S ribosomal protein L5
0.621721	1.08055	1.35943	-0.320051	-1.76804	-0.883316	-0.568008	-0.03725	0.514965		18	18	17	NaN	NaN	NaN	NaN	0	NaN	44546000000	628	704	73988.4	40	0	P09951	P09951	Synapsin-1	Syn1	Syn1	Synapsin-1
0.225993	-0.488933	-0.150092	NaN	NaN	-1.67832	-0.272847	1.15563	1.20857		5	5	5	NaN	NaN	NaN	NaN	0	NaN	642210000	23	193	21886.4	13	0	P0C089	P0C089	Phosphatidylglycerophosphatase and protein-tyrosine phosphatase 1	Ptpmt1	Ptpmt1	Phosphatidylglycerophosphatase and protein-tyrosine phosphatase 1
0.0776208	0.278304	0.772866	-2.24599	0.882067	-0.510669	1.0214	-0.415908	0.140303		7	7	7	NaN	NaN	NaN	NaN	0	NaN	866560000	21	386	43717.6	24	0	P0C0A2	P0C0A2	Vacuolar protein-sorting-associated protein 36	Vps36	Vps36	Vacuolar protein-sorting-associated protein 36
0.54035	NaN	NaN	NaN	NaN	0.653317	0.288824	NaN	-1.48249		2	2	2	NaN	NaN	NaN	NaN	0	NaN	2749200000	32	76	8248.46	4	0	P0C0A9	P0C0A9	Small VCP/p97-interacting protein	Svip	Svip	Small VCP/p97-interacting protein
-0.427927	1.22707	-0.617077	NaN	0.369339	-1.86758	-0.223315	0.958511	0.580975		6	6	6	NaN	NaN	NaN	NaN	0	NaN	673460000	26	1358	152447	65	0	P0C0R5	P0C0R5	Phosphoinositide 3-kinase regulatory subunit 4	Pik3r4	Pik3r4	Phosphoinositide 3-kinase regulatory subunit 4
NaN	NaN	NaN	NaN	NaN	NaN	NaN	0.707107	-0.707107		5	5	5	NaN	NaN	NaN	NaN	NaN	NaN	248110000	7	668	73771.5	29	0	P0C1S9	P0C1S9	Sn1-specific diacylglycerol lipase beta	Daglb	Daglb	Sn1-specific diacylglycerol lipase beta
0.509846	0.457806	0.769653	-0.447351	-2.48191	0.0301582	0.212278	0.273071	0.676445		16	16	16	27	27	27	NaN	0	NaN	5342300000	151	962	103761	37	0	P0C1X8	P0C1X8	AP2-associated protein kinase 1	Aak1	Aak1	AP2-associated protein kinase 1
0.829447	-1.11043	NaN	NaN	NaN	NaN	0.280988	NaN	NaN		5	5	5	NaN	NaN	NaN	NaN	NaN	NaN	405920000	6	858	98223.7	56	0	P0C219	P0C219	Sarcolemmal membrane-associated protein	Slmap	Slmap	Sarcolemmal membrane-associated protein
-0.0898582	1.28138	0.758183	-1.04567	NaN	-1.73019	-0.277532	0.519492	0.584192		5	5	5	NaN	NaN	NaN	NaN	0	NaN	946770000	45	563	61868.6	27	0	P0C2X9	P0C2X9	Delta-1-pyrroline-5-carboxylate dehydrogenase, mitochondrial	Aldh4a1	Aldh4a1	Delta-1-pyrroline-5-carboxylate dehydrogenase, mitochondrial
-0.520768	-1.21976	-0.739704	1.37272	NaN	-0.145179	0.760155	1.26834	-0.775809		5	5	5	33	33	33	NaN	0	NaN	577000000	13	179	20387.8	10	0	P0C5H9	P0C5H9	Mesencephalic astrocyte-derived neurotrophic factor	Manf	Manf	Mesencephalic astrocyte-derived neurotrophic factor
0.363971	1.54614	1.01723	-1.58246	-0.539789	-1.18415	0.0108303	-0.112991	0.481217		8	8	8	NaN	NaN	NaN	NaN	0	NaN	1018900000	26	972	102806	37	0	P0C5W1	P0C5W1	Microtubule-associated protein 1S;MAP1S heavy chain;MAP1S light chain	Map1s	Map1s	Microtubule-associated protein 1S
0.673235	-1.42783	-0.909588	1.18237	-0.0832591	1.59374	-0.843165	-0.0309493	-0.154545		5	5	5	14	14	14	NaN	0	NaN	7261500000	126	450	49032.3	14	0	P0C5X8	P0C5X8	Protein tweety homolog 1	Ttyh1	Ttyh1	Protein tweety homolog 1
-1.43962	NaN	0.255427	NaN	NaN	NaN	0.875909	NaN	0.308283		2	2	2	NaN	NaN	NaN	NaN	0	NaN	203270000	6	709	76118.6	30	0	P0CC10	P0CC10	Leucine-rich repeat-containing protein 4B	Lrrc4b	Lrrc4b	Leucine-rich repeat-containing protein 4B
0.534832	-1.04467	-0.455361	0.665207	0.274083	-0.49097	2.04223	-1.16428	-0.361074		2	2	2	NaN	NaN	NaN	NaN	0	NaN	6494900000	120	230.5	26159.7	12.5	0	P62986;P62982;P0CG51;Q63429	P62986;P62982;P0CG51;Q63429	Ubiquitin-60S ribosomal protein L40;Ubiquitin;60S ribosomal protein L40;Ubiquitin-40S ribosomal protein S27a;Ubiquitin;40S ribosomal protein S27a;Polyubiquitin-B;Ubiquitin;Polyubiquitin-C;Ubiquitin;Ubiquitin-related	Uba52;Rps27a;Ubb;Ubc	Uba52;Rps27a;Ubb;Ubc	Ubiquitin-60S ribosomal protein L40;Ubiquitin-40S ribosomal protein S27a;Polyubiquitin-B;Polyubiquitin-C
-1.21457	-0.304772	0.387036	NaN	NaN	NaN	NaN	NaN	1.13231		3	3	3	NaN	NaN	NaN	NaN	0	NaN	300290000	8	827	88585	42	0	P0DJJ3	P0DJJ3	SH3-containing GRB2-like protein 3-interacting protein 1	Sgip1	Sgip1	SH3-containing GRB2-like protein 3-interacting protein 1
-0.753765	-1.15416	-1.29583	1.23425	1.38804	0.540253	0.0180044	0.593866	-0.570664		15	12	8	36	NaN	NaN	NaN	0	NaN	1633600000	53	641	70185.3	33	0	P0DMW1;P0DMW0	P0DMW1;P0DMW0	Heat shock 70 kDa protein 1B;Heat shock 70 kDa protein 1A	Hspa1a	Hspa1b;Hspa1a	Heat shock 70 kDa protein 1B;Heat shock 70 kDa protein 1A
0.431275	-0.0602404	-1.59436	-0.406686	-0.767042	1.29174	1.21781	-0.879854	0.767367		2	2	2	NaN	NaN	NaN	NaN	0	NaN	3581500000	85	57	6998.16	3	0	P0DN35	P0DN35			Ndufb1	NADH dehydrogenase [ubiquinone] 1 beta subcomplex subunit 1
-0.429949	0.344574	0.432548	1.46539	-0.520584	0.913247	-0.735478	0.413147	-1.8829		10	10	10	NaN	NaN	NaN	NaN	0	NaN	81456000000	662	164	17874.3	10	0	P10111	P10111	Peptidyl-prolyl cis-trans isomerase A;Peptidyl-prolyl cis-trans isomerase A, N-terminally processed	Ppia	Ppia	Peptidyl-prolyl cis-trans isomerase A
-0.241239	-1.13527	-0.854929	2.23822	0.293808	0.657615	-0.0788289	-0.459509	-0.419872		4	4	4	NaN	NaN	NaN	NaN	0	NaN	1310300000	47	240	27679.8	11	0	P10252	P10252	CD48 antigen	Cd48	Cd48	CD48 antigen
-0.301555	-0.869412	-0.795415	1.82159	0.112055	1.35502	-0.0452411	-0.120715	-1.15632		6	6	6	NaN	NaN	NaN	NaN	0	NaN	1817700000	58	619	71031.3	38	0	P10362	P10362	Secretogranin-2;Secretoneurin;Manserin	Scg2	Scg2	Secretogranin-2
-0.125212	-0.572775	0.159417	1.51382	0.403564	1.18516	-1.8717	-0.466273	-0.225998		11	5	5	NaN	NaN	NaN	NaN	0	NaN	4092000000	116	510	57402.1	19	0	P10499;P15384;P15385;Q8R523;P19024	P10499;P15384	Potassium voltage-gated channel subfamily A member 1;Potassium voltage-gated channel subfamily A member 3	Kcna1;Kcna3	Kcna1;Kcna3	Potassium voltage-gated channel subfamily A member 1;Potassium voltage-gated channel subfamily A member 3
0.717811	0.838211	0.18008	-1.48589	-0.206993	-1.4688	0.79958	1.18086	-0.554862		9	5	5	NaN	NaN	NaN	NaN	0	NaN	5309000000	173	201	22163.1	15	0	P10536	P10536	Ras-related protein Rab-1B	Rab1b	Rab1b	Ras-related protein Rab-1B
0.242364	0.565693	-0.116708	1.46198	NaN	-1.72536	-0.0254491	-1.04141	0.638895		8	8	8	NaN	NaN	NaN	NaN	0	NaN	891030000	26	1290	148548	65	0	P10686	P10686	1-phosphatidylinositol 4,5-bisphosphate phosphodiesterase gamma-1	Plcg1	Plcg1	1-phosphatidylinositol 4,5-bisphosphate phosphodiesterase gamma-1
0.743671	0.988351	0.714897	1.19862	-1.50083	0.0133949	-1.22645	-0.872958	-0.0587019		19	19	19	20	20	20	NaN	0	NaN	3319000000	74	1216	138344	61	0	P10687	P10687	1-phosphatidylinositol 4,5-bisphosphate phosphodiesterase beta-1	Plcb1	Plcb1	1-phosphatidylinositol 4,5-bisphosphate phosphodiesterase beta-1
-0.180871	1.08374	1.38618	-0.296177	NaN	-1.17276	-0.9558	-0.793973	0.929665		9	9	9	NaN	NaN	NaN	NaN	0	NaN	721970000	44	756	85962.2	34	0	P10688	P10688	1-phosphatidylinositol 4,5-bisphosphate phosphodiesterase delta-1	Plcd1	Plcd1	1-phosphatidylinositol 4,5-bisphosphate phosphodiesterase delta-1
0.287991	0.577983	-2.17803	-0.482857	1.28609	-0.500184	0.49019	0.663726	-0.144912		25	25	25	NaN	NaN	NaN	NaN	0	NaN	543290000000	3151	529	56353.6	27	0	P10719	P10719	ATP synthase subunit beta, mitochondrial	Atp5b	Atp5b	ATP synthase subunit beta, mitochondrial
2.05582	0.444447	-0.377099	0.529931	-0.51975	-1.57372	-0.570314	-0.195897	0.206588		15	15	15	NaN	NaN	NaN	NaN	0	NaN	24821000000	447	432	47538	25	0	P10760	P10760	Adenosylhomocysteinase	Ahcy	Ahcy	Adenosylhomocysteinase
0.298184	-1.15985	-0.0065089	1.14962	-1.46031	-0.520055	-0.522513	0.886237	1.3352		3	3	3	NaN	NaN	NaN	NaN	0	NaN	19509000000	162	111	12301	6	0	P10818	P10818	Cytochrome c oxidase subunit 6A1, mitochondrial	Cox6a1	Cox6a1	Cytochrome c oxidase subunit 6A1, mitochondrial
-0.20883	0.194236	-0.426355	1.85846	0.972496	0.598419	-0.962443	-1.02933	-0.996658		8	4	4	26	NaN	NaN	NaN	0	NaN	5178700000	94	354	40345.1	15	0	P10824	P10824	Guanine nucleotide-binding protein G(i) subunit alpha-1	Gnai1	Gnai1	Guanine nucleotide-binding protein G(i) subunit alpha-1
-0.492559	0.433102	1.20426	-1.81573	-0.0653437	-0.9503	-0.24073	0.954115	0.973178		25	25	25	NaN	NaN	NaN	NaN	0	NaN	165590000000	1492	558	61415.9	33	0	P10860	P10860	Glutamate dehydrogenase 1, mitochondrial	Glud1	Glud1	Glutamate dehydrogenase 1, mitochondrial
1.01006	0.596449	0.688823	-1.66383	0.497654	-1.35333	-0.786313	0.799528	0.210966		6	6	6	NaN	NaN	NaN	NaN	0	NaN	2466800000	60	236	26407.2	11	0	P10868	P10868	Guanidinoacetate N-methyltransferase	Gamt	Gamt	Guanidinoacetate N-methyltransferase
1.05918	0.00928184	0.51065	-1.1606	-0.281773	-1.27758	1.57194	-0.920802	0.489699		10	10	10	NaN	NaN	NaN	NaN	0	NaN	71274000000	441	169	19514.6	12	0	P10888	P10888	Cytochrome c oxidase subunit 4 isoform 1, mitochondrial	Cox4i1	Cox4i1	Cytochrome c oxidase subunit 4 isoform 1, mitochondrial
-1.08644	-1.17327	-0.947031	-0.123489	1.58748	1.11458	-0.270079	0.83135	0.066899		13	13	12	31	31	NaN	NaN	0	NaN	7497500000	141	549	60174.8	29	0	P10959;Q63108;Q64573	P10959	Carboxylesterase 1C	Ces1c	Ces1c	Carboxylesterase 1C
-0.102242	-1.19837	-1.11751	1.71554	0.216951	1.14864	-0.133781	0.382359	-0.911584		10	10	10	NaN	NaN	NaN	NaN	0	NaN	8795500000	166	554	61124	30	0	P10960	P10960	Sulfated glycoprotein 1	Psap	Psap	Prosaposin
0.286848	0.645486	-0.427055	1.39233	0.0331204	0.794341	-1.29874	0.297793	-1.72413		2	2	2	NaN	NaN	NaN	NaN	0	NaN	6618300000	80	87	10027.5	4	0	P11030	P11030	Acyl-CoA-binding protein;Triakontatetraneuropeptide;Octadecaneuropeptide	Dbi	Dbi	Acyl-CoA-binding protein
0.485354	-1.15205	-0.677921	1.54604	-1.11003	0.40194	1.22551	-0.82496	0.106111		4	4	4	NaN	NaN	NaN	NaN	0	NaN	4150500000	139	492	53962.5	11	0	P11167	P11167	Solute carrier family 2, facilitated glucose transporter member 1	Slc2a1	Slc2a1	Solute carrier family 2, facilitated glucose transporter member 1
-0.241999	-1.16584	-0.288774	1.64695	0.374356	1.10991	-0.00959076	0.12384	-1.54885		5	5	5	41	41	41	NaN	0	NaN	2775400000	60	105	11673.5	7	0	P11232	P11232	Thioredoxin	Txn	Txn	Thioredoxin
-0.385638	-0.683559	-0.798625	1.20939	NaN	0.404769	-0.597934	1.72957	-0.877971		4	4	4	NaN	NaN	NaN	NaN	0	NaN	10259000000	73	146	16129.5	11	0	P11240	P11240	Cytochrome c oxidase subunit 5A, mitochondrial	Cox5a	Cox5a	Cytochrome c oxidase subunit 5A, mitochondrial
-1.15662	-1.08453	0.793864	-0.0420367	1.08503	1.6291	-0.85653	-0.516781	0.148504		7	4	4	NaN	NaN	NaN	NaN	0	NaN	875500000	28	478	54114.7	24	0	P11275	P11275	Calcium/calmodulin-dependent protein kinase type II subunit alpha	Camk2a	Camk2a	Calcium/calmodulin-dependent protein kinase type II subunit alpha
1.13241	1.12307	1.50648	-0.473936	-0.357871	-0.23377	-1.38503	-0.629054	-0.682303		10	10	10	NaN	NaN	NaN	NaN	0	NaN	30128000000	385	241	25552.2	14	0	P11348	P11348	Dihydropteridine reductase	Qdpr	Qdpr	Dihydropteridine reductase
0.672027	0.684379	-2.49701	-0.0279072	0.632409	-0.306876	0.0314691	0.306323	0.505189		75	75	75	NaN	NaN	NaN	NaN	0	NaN	371720000000	3474	1675	191599	90	0	P11442	P11442	Clathrin heavy chain 1	Cltc	Cltc	Clathrin heavy chain 1
-0.313875	0.119659	0.450283	-1.63156	0.235873	-1.38806	0.0751397	1.11017	1.34237		40	40	40	NaN	NaN	NaN	NaN	0	NaN	5489000000	234	2345	265194	121	0	P11497	P11497	Acetyl-CoA carboxylase 1;Biotin carboxylase	Acaca	Acaca	Acetyl-CoA carboxylase 1
0.192885	0.100395	1.33438	-2.02145	0.985606	0.23108	-0.247484	-0.933559	0.358149		27	18	16	NaN	NaN	NaN	NaN	0	NaN	11261000000	264	1258	138719	52	0	P11505	P11505	Plasma membrane calcium-transporting ATPase 1	Atp2b1	Atp2b1	Plasma membrane calcium-transporting ATPase 1
1.81383	0.810436	0.129302	-0.800897	-1.02183	-0.960297	0.892186	-0.792355	-0.0703728		29	29	20	NaN	NaN	NaN	NaN	0	NaN	49799000000	1001	1243	136811	56	0	P11506	P11506	Plasma membrane calcium-transporting ATPase 2	Atp2b2	Atp2b2	Plasma membrane calcium-transporting ATPase 2
0.455806	0.279452	1.13968	-1.77464	-0.649357	-0.553497	-0.684356	0.407124	1.37979		30	30	26	NaN	NaN	NaN	NaN	0	NaN	23808000000	533	1043	114768	47	0	P11507;Q64578	P11507	Sarcoplasmic/endoplasmic reticulum calcium ATPase 2	Atp2a2	Atp2a2	Sarcoplasmic/endoplasmic reticulum calcium ATPase 2
-0.663989	-0.87227	-1.03368	-0.089967	1.9839	1.05374	-0.305296	0.50212	-0.574557		20	5	5	NaN	32	32	NaN	0	NaN	213900000000	549	147	15982.4	11	0	P11517	P11517	Hemoglobin subunit beta-2			Hemoglobin subunit beta-2
-0.288127	-0.15177	0.890313	-0.333281	NaN	-1.56082	-0.171994	-0.245544	1.86123		7	7	7	NaN	NaN	NaN	NaN	0	NaN	472140000	19	3677	425828	188	0	P11530	P11530	Dystrophin	Dmd	Dmd	Dystrophin
-0.349164	-0.775957	-1.61321	0.818259	0.424161	1.52131	0.738632	0.197738	-0.961768		24	24	24	NaN	NaN	NaN	NaN	0	NaN	46414000000	726	505	56623.4	29	0	P11598	P11598	Protein disulfide-isomerase A3	Pdia3	Pdia3	Protein disulfide-isomerase A3
0.727317	0.485891	0.922861	-0.965403	NaN	-1.92598	0.42924	-0.339172	0.665248		5	5	5	12	12	12	NaN	0	NaN	1600000000	36	609	68618	13	0	P11661	P11661	NADH-ubiquinone oxidoreductase chain 5	Mtnd5	Mtnd5	NADH-ubiquinone oxidoreductase chain 5
-0.843309	-0.0418647	1.40862	-1.83291	0.449794	-0.674195	-0.0273303	0.963695	0.597503		15	15	10	NaN	NaN	NaN	NaN	0	NaN	15721000000	269	527	59038.2	25	0	P11730	P11730	Calcium/calmodulin-dependent protein kinase type II subunit gamma	Camk2g	Camk2g	Calcium/calmodulin-dependent protein kinase type II subunit gamma
-0.819501	-0.792125	-1.43153	1.69781	-0.238546	1.10402	0.512768	0.322572	-0.355467		6	6	6	NaN	NaN	NaN	NaN	0	NaN	5812500000	109	135	14856.8	9	0	P11762	P11762	Galectin-1	Lgals1	Lgals1	Galectin-1
0.59737	1.25366	0.792339	-0.820986	-0.282154	-2.03588	0.216581	-0.339737	0.618802		14	14	14	NaN	NaN	NaN	NaN	0	NaN	23921000000	490	519	56488.4	24	0	P11884	P11884	Aldehyde dehydrogenase, mitochondrial	Aldh2	Aldh2	Aldehyde dehydrogenase, mitochondrial
-0.033926	-0.581428	-0.766689	1.85608	-1.62945	0.393418	0.891955	-0.148796	0.0188343		7	7	7	NaN	NaN	NaN	NaN	0	NaN	2134300000	83	547	58813.3	25	0	P11915	P11915	Non-specific lipid-transfer protein	Scp2	Scp2	Non-specific lipid-transfer protein
0.08005	-0.130414	0.780152	-1.49871	-1.68745	0.0207813	0.372735	1.09187	0.970979		3	3	3	25	25	25	NaN	0	NaN	20624000000	133	76	8503.98	4.5	0	P11951;P11950	P11951;P11950	Cytochrome c oxidase subunit 6C-2;Cytochrome c oxidase subunit 6C-1	Cox6c2;Cox6c1	Cox6c2;Cox6c1	Cytochrome c oxidase subunit 6C-2;Cytochrome c oxidase subunit 6C-1
-1.94843	0.698475	0.191405	NaN	NaN	NaN	-0.0561163	0.391879	0.722783		6	6	6	NaN	NaN	NaN	NaN	0	NaN	608320000	10	441	50164.5	26	0	P11960	P11960	2-oxoisovalerate dehydrogenase subunit alpha, mitochondrial	Bckdha	Bckdha	2-oxoisovalerate dehydrogenase subunit alpha, mitochondrial
0.894388	1.19645	1.00367	-1.20374	0.793158	-0.919954	-1.19112	0.0699332	-0.642771		36	36	35	NaN	NaN	NaN	NaN	0	NaN	375330000000	2477	531	57817.8	34	0	P11980	P11980	Pyruvate kinase PKM	Pkm	Pkm	Pyruvate kinase PKM
-0.325921	0.239827	1.34627	NaN	-0.451258	-1.52482	-1.00264	0.778273	0.940269		3	3	3	NaN	NaN	NaN	NaN	0	NaN	1180500000	37	188	21658.6	7	0	P12001	P12001	60S ribosomal protein L18	Rpl18	Rpl18	60S ribosomal protein L18
0.947663	1.1077	1.23202	-0.142667	-1.7994	-0.691036	-0.329629	-0.641893	0.317239		9	9	9	NaN	NaN	NaN	NaN	0	NaN	3235700000	86	424	46435.5	22	0	P12007	P12007	Isovaleryl-CoA dehydrogenase, mitochondrial	Ivd	Ivd	Isovaleryl-CoA dehydrogenase, mitochondrial
-0.613328	-0.952403	0.448824	1.74127	NaN	NaN	0.499932	-0.0138126	-1.11048		3	3	3	24	24	24	NaN	0	NaN	5467200000	60	129	13914.9	8	0	P12075	P12075	Cytochrome c oxidase subunit 5B, mitochondrial	Cox5b	Cox5b	Cytochrome c oxidase subunit 5B, mitochondrial
-0.675668	-0.740172	-1.72938	-0.366072	1.61466	0.571185	0.0974739	0.908956	0.319013		34	34	33	NaN	NaN	43	NaN	0	NaN	233400000000	1516	698	76395.2	38	0	P12346;CON__Q29443;CON__Q0IIK2	P12346	Serotransferrin	Tf	Tf	Serotransferrin
-0.638195	0.112478	0.352131	-0.570059	-0.947525	1.98824	-1.32392	0.523423	0.503429		11	11	9	NaN	NaN	NaN	NaN	0	NaN	6829900000	97	401	45540.3	21	0	P12368	P12368	cAMP-dependent protein kinase type II-alpha regulatory subunit	Prkar2a	Prkar2a	cAMP-dependent protein kinase type II-alpha regulatory subunit
0.00650079	1.08847	1.06772	0.590266	-2.00958	-0.813455	-0.593912	0.168487	0.495506		9	7	7	NaN	NaN	NaN	NaN	0	NaN	978370000	43	416	46123	23	0	P12369	P12369	cAMP-dependent protein kinase type II-beta regulatory subunit	Prkar2b	Prkar2b	cAMP-dependent protein kinase type II-beta regulatory subunit
1.13776	1.61434	0.597014	0.370372	-0.561022	-0.230305	-1.32985	-1.10916	-0.489152		9	9	9	NaN	NaN	NaN	NaN	0	NaN	11821000000	203	374	39575.9	20	0	P12711;P41682	P12711	Alcohol dehydrogenase class-3	Adh5	Adh5	Alcohol dehydrogenase class-3
NaN	-1.20599	NaN	NaN	NaN	NaN	-0.333376	0.416392	1.12297		2	2	2	11	11	11	NaN	NaN	NaN	272410000	4	145	17277.3	6	0	P12749	P12749	60S ribosomal protein L26	Rpl26	Rpl26	60S ribosomal protein L26
0.943704	0.70828	-2.04774	-0.593068	-0.161037	-0.832787	0.523392	0.77795	0.681308		74	74	74	44	44	44	NaN	0	NaN	127640000000	2103	2505	272650	115	0	P12785	P12785	Fatty acid synthase;[Acyl-carrier-protein] S-acetyltransferase;[Acyl-carrier-protein] S-malonyltransferase;3-oxoacyl-[acyl-carrier-protein] synthase;3-oxoacyl-[acyl-carrier-protein] reductase;3-hydroxyacyl-[acyl-carrier-protein] dehydratase;Enoyl-[acyl-carrier-protein] reductase;Oleoyl-[acyl-carrier-protein] hydrolase	Fasn	Fasn	Fatty acid synthase
-0.18492	-0.313467	-2.29069	1.08578	-0.0208877	0.868764	0.736711	0.320499	-0.201789		43	43	38	NaN	NaN	NaN	NaN	0	NaN	447850000000	2242	846	95791.2	45	0	P12839	P12839	Neurofilament medium polypeptide	Nefm	Nefm	Neurofilament medium polypeptide
NaN	NaN	NaN	NaN	0.707107	NaN	NaN	-0.707107	NaN		5	4	4	NaN	NaN	NaN	NaN	0	NaN	94858000	5	574	62200.5	34	0	P12928	P12928	Pyruvate kinase PKLR	Pklr	Pklr	Pyruvate kinase PKLR
-1.24985	-0.851337	-0.276183	-0.529211	NaN	0.338176	0.375105	2.01763	0.175667		3	3	3	NaN	NaN	NaN	NaN	0	NaN	301890000	9	292	32560.1	12	0	P13084	P13084	Nucleophosmin	Npm1	Npm1	Nucleophosmin
-0.105363	0.969243	-0.0631518	1.12996	0.233419	-0.073067	-0.926867	-2.02641	0.862235		3	3	3	NaN	NaN	NaN	NaN	0	NaN	3243700000	112	346	36147.9	14	0	P13086	P13086	Succinyl-CoA ligase [ADP/GDP-forming] subunit alpha, mitochondrial	Suclg1	Suclg1	Succinate--CoA ligase [ADP/GDP-forming] subunit alpha, mitochondrial
-0.118633	0.344481	0.931877	-1.56395	-0.393046	-1.49736	0.250325	1.02363	1.02267		4	4	3	NaN	NaN	NaN	NaN	0	NaN	280660000	23	500	56690.8	30.5	0	Q64680;P13108;P12939;P10633	Q64680;P13108	Cytochrome P450 2D18;Cytochrome P450 2D4	Cyp2d18;Cyp2d4	Cyp2d18;Cyp2d4	Cytochrome P450 2D18;Cytochrome P450 2D4
1.00542	1.73604	1.06824	-0.431047	-0.522285	-0.77978	-1.15311	-0.537324	-0.386165		23	23	23	NaN	NaN	NaN	NaN	0	NaN	163300000000	952	413	46428.7	23	0	P13221	P13221	Aspartate aminotransferase, cytoplasmic	Got1	Got1	Aspartate aminotransferase, cytoplasmic
0.660699	0.552401	-2.35605	-0.63236	-0.141457	0.380423	0.996669	0.226292	0.313379		31	31	31	NaN	NaN	NaN	NaN	0	NaN	758480000000	3008	420	47268.4	27	0	P13233	P13233	2,3-cyclic-nucleotide 3-phosphodiesterase	Cnp	Cnp	2',3'-cyclic-nucleotide 3'-phosphodiesterase
0.613247	0.921326	1.41281	-1.81092	0.123888	-0.839771	-0.645942	-0.297472	0.522833		20	20	20	NaN	NaN	NaN	NaN	0	NaN	15505000000	312	674	74023.7	35	0	P13264	P13264	Glutaminase kidney isoform, mitochondrial;Glutaminase kidney isoform 68 kDa chain;Glutaminase kidney isoform 65 kDa chain	Gls	Gls	Glutaminase kidney isoform, mitochondrial
-0.618879	-0.30139	0.166873	0.729481	-1.70495	1.19213	-1.03671	1.19014	0.383311		9	9	9	NaN	NaN	NaN	NaN	0	NaN	1557300000	66	713	77147.4	35	0	P13383	P13383	Nucleolin	Ncl	Ncl	Nucleolin
0.874198	0.215657	1.34533	-0.729379	0.338412	-0.395957	-2.03545	-0.229514	0.616697		11	11	11	NaN	NaN	NaN	NaN	0	NaN	6166600000	139	397	41870.9	22	0	P13437	P13437	3-ketoacyl-CoA thiolase, mitochondrial	Acaa2	Acaa2	3-ketoacyl-CoA thiolase, mitochondrial
-0.434337	-0.113508	0.783864	2.05211	-1.23537	-1.0732	-0.174519	-0.252888	0.447851		3	3	3	NaN	NaN	NaN	NaN	0	NaN	1189400000	37	151	16258.7	4	0	P13471	P13471	40S ribosomal protein S14	Rps14	Rps14	40S ribosomal protein S14
0.511686	-0.00135252	-2.1299	1.1876	-0.32873	0.772284	0.747972	-0.72541	-0.0341495		23	23	23	35	35	35	NaN	0	NaN	87523000000	1008	858	94658.3	38	0	P13596	P13596	Neural cell adhesion molecule 1	Ncam1	Ncam1	Neural cell adhesion molecule 1
-0.948747	-0.932162	-1.16547	0.0788522	1.9727	0.556666	-0.342163	0.739055	0.0412657		21	21	21	NaN	NaN	NaN	NaN	0	NaN	14956000000	430	1059	120841	48	0	P13635;CON__ENSEMBL:ENSBTAP00000031900	P13635	Ceruloplasmin	Cp	Cp	Ceruloplasmin
0.929262	0.071641	-0.333558	0.269043	-2.10872	1.04374	0.958955	-0.686538	-0.143832		10	10	10	NaN	NaN	NaN	NaN	0	NaN	89513000000	528	290	33412.2	13	0	P13638	P13638	Sodium/potassium-transporting ATPase subunit beta-2	Atp1b2	Atp1b2	Sodium/potassium-transporting ATPase subunit beta-2
-0.229185	-0.212579	-0.483948	1.50372	NaN	1.32505	0.292778	-0.819946	-1.3759		5	5	3	NaN	NaN	NaN	NaN	0	NaN	2082200000	87	149	17288.5	9	0	P13668	P13668	Stathmin	Stmn1	Stmn1	Stathmin
-0.587536	0.00150353	-0.340451	-0.74959	2.37071	0.479176	-1.01226	0.130673	-0.292225		16	16	16	NaN	NaN	NaN	NaN	0	NaN	5684800000	124	732	81383.8	31	0	P13676	P13676	Acylamino-acid-releasing enzyme	Apeh	Apeh	Acylamino-acid-releasing enzyme
0.707803	0.965577	0.679798	-1.40649	-0.458376	-1.73836	0.155285	0.915465	0.179295		16	16	16	NaN	NaN	NaN	NaN	0	NaN	17792000000	403	572	64002.7	30	0	P13697	P13697	NADP-dependent malic enzyme	Me1	Me1	NADP-dependent malic enzyme
1.04662	0.21392	-0.126733	0.219769	-2.24027	1.08799	-0.668891	0.101123	0.366467		10	10	10	45	45	45	NaN	0	NaN	8089500000	150	333	34951.4	20	0	P13803	P13803	Electron transfer flavoprotein subunit alpha, mitochondrial	Etfa	Etfa	Electron transfer flavoprotein subunit alpha, mitochondrial
0.266589	-1.36493	-0.679476	1.34144	0.173035	1.72643	-0.264863	-0.543339	-0.654884		2	2	2	NaN	NaN	NaN	NaN	0	NaN	4602200000	70	254	27804.2	12	0	P13852	P13852	Major prion protein	Prnp	Prnp	Major prion protein
-0.978153	-1.08673	-1.05513	0.265016	1.72968	0.962047	-0.306893	0.762663	-0.2925		39	18	11	NaN	NaN	NaN	NaN	0	NaN	61637000000	612	1477	163773	60	0	P14046	P14046	Alpha-1-inhibitor 3	A1i3	A1i3	Alpha-1-inhibitor 3
1.01573	0.535428	0.056021	-0.673324	1.37679	-2.00899	-0.357078	0.31449	-0.25907		15	15	15	NaN	NaN	NaN	NaN	0	NaN	2363200000	93	480	54053.4	21	0	P14173	P14173	Aromatic-L-amino-acid decarboxylase	Ddc	Ddc	Aromatic-L-amino-acid decarboxylase
NaN	NaN	NaN	NaN	0.707107	NaN	NaN	-0.707107	NaN		4	4	4	NaN	NaN	NaN	NaN	0	NaN	177690000	3	638	71273.6	39	0	P14272	P14272	Plasma kallikrein;Plasma kallikrein heavy chain;Plasma kallikrein light chain	Klkb1	Klkb1	Plasma kallikrein
0.100506	0.689963	1.45426	-1.40887	0.774171	-1.44736	-0.739059	0.34963	0.226754		14	14	14	NaN	NaN	NaN	NaN	0	NaN	26236000000	448	507	54463.9	27	0	P14408	P14408	Fumarate hydratase, mitochondrial	Fh	Fh	Fumarate hydratase, mitochondrial
-1.08099	-1.07258	-1.12825	-0.0254991	1.65835	0.672175	-0.0664443	1.09472	-0.0514801		22	22	22	NaN	NaN	NaN	NaN	0	NaN	25940000000	389	479	54235.2	28	0	P14480;CON__P02676	P14480	Fibrinogen beta chain;Fibrinopeptide B;Fibrinogen beta chain	Fgb	Fgb	Fibrinogen beta chain
1.11782	-1.89372	-0.293079	-0.199638	-0.266328	0.143344	NaN	-0.00376044	1.39536		2	2	2	NaN	NaN	NaN	NaN	0	NaN	3646900000	20	407	43969.1	18	0	P14562	P14562	Lysosome-associated membrane glycoprotein 1	Lamp1	Lamp1	Lysosome-associated membrane glycoprotein 1
-0.532289	-0.628649	0.821646	0.351651	1.81247	-0.562216	-1.66512	0.385596	0.016909		6	6	6	NaN	NaN	NaN	NaN	0	NaN	9121900000	138	290	31516.4	16	0	P14604	P14604	Enoyl-CoA hydratase, mitochondrial	Echs1	Echs1	Enoyl-CoA hydratase, mitochondrial
NaN	NaN	NaN	NaN	0.707107	NaN	NaN	-0.707107	NaN		2	2	2	NaN	NaN	NaN	NaN	0	NaN	122000000	11	190	21512.6	7	0	P14630	P14630	Apolipoprotein M	Apom	Apom	Apolipoprotein M
-0.411144	-0.685313	-1.57182	0.733415	1.23776	-1.10863	1.12153	0.565477	0.118728		22	14	13	NaN	NaN	NaN	NaN	0	NaN	9607900000	218	633	69641.7	35	0	P14659	P14659	Heat shock-related 70 kDa protein 2	Hspa2	Hspa2	Heat shock-related 70 kDa protein 2
0.034768	0.536531	1.05624	-0.0459361	1.86525	-0.756577	-0.631131	-0.921746	-1.1374		15	15	15	NaN	NaN	NaN	NaN	0	NaN	51055000000	496	319	35744.5	22	0	P14668	P14668	Annexin A5	Anxa5	Anxa5	Annexin A5
0.264864	0.505516	-0.136347	-1.30354	1.8875	-1.26616	-0.392229	0.739748	-0.299356		20	20	20	NaN	NaN	NaN	NaN	0	NaN	12631000000	315	324	36363.2	21	0	P14669	P14669	Annexin A3	Anxa3	Anxa3	Annexin A3
-0.271482	NaN	NaN	2.16586	-0.835182	-0.582131	-0.199948	-0.384084	0.106966		9	9	9	NaN	NaN	NaN	NaN	0	NaN	4170900000	10	767	88088.5	39	0	P14740	P14740	Dipeptidyl peptidase 4;Dipeptidyl peptidase 4 membrane form;Dipeptidyl peptidase 4 soluble form;Dipeptidyl peptidase 4 60 kDa soluble form	Dpp4	Dpp4	Dipeptidyl peptidase 4
1.58605	0.991128	0.611835	-0.804603	-0.567144	0.495239	-0.864653	-1.47149	0.0236395		5	5	5	NaN	NaN	NaN	NaN	0	NaN	3134600000	60	140	15436.7	8	0	P14841	P14841	Cystatin-C	Cst3	Cst3	Cystatin-C
0.690836	0.0327819	-0.640978	-0.708914	2.25123	-0.585915	-1.02365	0.265198	-0.280592		19	19	19	NaN	NaN	NaN	NaN	0	NaN	5157200000	138	737	81622.8	45	0	P14882	P14882	Propionyl-CoA carboxylase alpha chain, mitochondrial	Pcca	Pcca	Propionyl-CoA carboxylase alpha chain, mitochondrial
-0.908749	-0.310528	0.624123	2.2291	0.13383	0.206249	-0.669786	-1.07624	-0.227999		6	6	6	NaN	NaN	NaN	NaN	0	NaN	507030000	32	976	108675	47	0	P14925	P14925	Peptidyl-glycine alpha-amidating monooxygenase;Peptidylglycine alpha-hydroxylating monooxygenase;Peptidyl-alpha-hydroxyglycine alpha-amidating lyase	Pam	Pam	Peptidyl-glycine alpha-amidating monooxygenase
-0.257716	-0.243085	0.108203	0.263422	1.3827	1.18796	-2.0989	-0.115631	-0.226954		4	4	4	NaN	NaN	NaN	NaN	NaN	NaN	1697400000	27	222	25509.8	10	0	P14942	P14942	Glutathione S-transferase alpha-4	Gsta4	Gsta4	Glutathione S-transferase alpha-4
-1.28267	-0.63296	-0.198402	-0.493487	1.87612	1.27739	-0.518206	0.340199	-0.367983		7	7	7	NaN	NaN	NaN	NaN	0	NaN	3596900000	85	476	53308.9	24	0	P15087	P15087	Carboxypeptidase E	Cpe	Cpe	Carboxypeptidase E
0.633182	0.664373	-0.780027	0.834749	-1.9424	0.506148	0.680943	0.470111	-1.06708		32	32	32	32	32	32	NaN	0	NaN	5080100000	187	1861	202411	87	0	P15146	P15146	Microtubule-associated protein 2	Map2	Map2	Microtubule-associated protein 2
0.91026	0.670413	0.741839	-1.3769	-1.15246	-0.645305	-0.944016	0.782032	1.01414		20	20	20	NaN	NaN	NaN	NaN	0	NaN	6864500000	231	501	57126.2	35	0	P15178	P15178	Aspartate--tRNA ligase, cytoplasmic	Dars	Dars	Aspartate--tRNA ligase, cytoplasmic
0.403014	-0.0872728	-1.30243	0.548704	0.464447	-0.611636	2.026	-0.496679	-0.94414		65	63	63	NaN	NaN	NaN	NaN	0	NaN	71903000000	1448	2459	269500	100	0	P15205	P15205	Microtubule-associated protein 1B;MAP1B heavy chain;MAP1 light chain LC1	Map1b	Map1b	Microtubule-associated protein 1B
-0.53452	-0.0482628	-1.38735	NaN	NaN	NaN	1.6076	-0.0805802	0.443113		3	3	3	NaN	NaN	NaN	NaN	0	NaN	210280000	13	1068	116812	57	0	P15304	P15304	Hormone-sensitive lipase	Lipe	Lipe	Hormone-sensitive lipase
0.867438	0.421165	1.22188	-1.19349	0.483979	-1.19073	-1.35451	-0.0688881	0.813158		14	14	14	NaN	NaN	NaN	NaN	0	NaN	22466000000	252	430	47872.9	21	0	P15650	P15650	Long-chain specific acyl-CoA dehydrogenase, mitochondrial	Acadl	Acadl	Long-chain specific acyl-CoA dehydrogenase, mitochondrial
0.592679	0.871489	1.00669	-1.90551	-0.886893	-0.523699	-0.502238	0.564442	0.783044		10	10	10	NaN	NaN	NaN	NaN	0	NaN	2823800000	97	412	44765.4	21	0	P15651	P15651	Short-chain specific acyl-CoA dehydrogenase, mitochondrial	Acads	Acads	Short-chain specific acyl-CoA dehydrogenase, mitochondrial
-0.911311	-1.22427	-0.696286	1.84336	NaN	0.390033	-0.360904	0.329195	0.630184		7	7	7	NaN	NaN	NaN	NaN	0	NaN	1918600000	45	965	109449	38	0	P15684	P15684	Aminopeptidase N	Anpep	Anpep	Aminopeptidase N
-1.02876	-1.22953	1.44354	NaN	NaN	NaN	-0.0147013	0.384056	0.445395		8	5	5	NaN	NaN	NaN	NaN	0	NaN	1124700000	30	533	60080.6	28	0	P15791	P15791	Calcium/calmodulin-dependent protein kinase type II subunit delta	Camk2d	Camk2d	Calcium/calmodulin-dependent protein kinase type II subunit delta
-0.990084	-1.71216	-0.0921131	-0.167906	0.375694	1.69415	-0.0397344	-0.0835867	1.01574		23	23	23	NaN	NaN	NaN	NaN	0	NaN	1894500000	68	1801	196474	99	0	P15800	P15800	Laminin subunit beta-2	Lamb2	Lamb2	Laminin subunit beta-2
NaN	-0.306563	NaN	NaN	NaN	-0.962599	1.15911	0.957751	-0.847701		4	4	4	NaN	NaN	NaN	NaN	0	NaN	1078700000	15	219	21987.4	9	0	P15865;P06349;D4A3K5	P15865	Histone H1.4	Hist1h1e	Hist1h1e	Histone H1.4
NaN	NaN	NaN	NaN	NaN	NaN	NaN	-0.707107	0.707107		2	2	2	NaN	NaN	NaN	NaN	NaN	NaN	2965400000	44	765	86882.6	32	0	P15943	P15943	Amyloid-like protein 2	Aplp2	Aplp2	Amyloid-like protein 2
0.773552	1.01498	-2.40706	-0.220579	-0.196001	-0.12272	0.278894	0.514666	0.364271		24	24	24	NaN	NaN	NaN	NaN	0	NaN	295350000000	1979	553	59753.6	31	0	P15999	P15999	ATP synthase subunit alpha, mitochondrial	Atp5a1	Atp5a1	ATP synthase subunit alpha, mitochondrial
0.315436	-0.298413	1.34946	-1.36652	0.00927601	-1.20926	-0.768766	0.72791	1.24088		9	9	9	NaN	NaN	NaN	NaN	0	NaN	30580000000	346	356	39445.1	19	0	P16036	P16036	Phosphate carrier protein, mitochondrial	Slc25a3	Slc25a3	Phosphate carrier protein, mitochondrial
0.448177	-0.209337	-0.601583	2.08353	-0.672939	0.521026	0.435492	-0.747649	-1.25672		146	146	146	61	61	61	NaN	0	NaN	299970000000	4590	2472	284637	143	0	P16086	P16086	Spectrin alpha chain, non-erythrocytic 1	Sptan1	Sptan1	Spectrin alpha chain, non-erythrocytic 1
NaN	NaN	NaN	NaN	1.72392	-0.57701	-0.272514	-0.0918079	-0.782593		4	4	4	NaN	NaN	NaN	NaN	0	NaN	173740000	8	462	51808.5	21	0	P16296	P16296	Coagulation factor IX;Coagulation factor IXa light chain;Coagulation factor IXa heavy chain	F9	F9	Coagulation factor IX
-0.735219	-1.15308	-1.39018	0.571975	1.08008	1.40579	0.405004	0.430439	-0.614806		4	4	2	NaN	NaN	NaN	NaN	0	NaN	1090400000	22	371	41830	22	0	P16391	P16391	RT1 class I histocompatibility antigen, AA alpha chain			RT1 class I histocompatibility antigen, AA alpha chain
1.49294	1.1744	0.547691	-0.920416	0.424068	-0.13402	-1.55828	-0.298696	-0.727694		14	14	13	NaN	NaN	NaN	NaN	0	NaN	23641000000	371	271	31907.4	18	0	P16446	P16446	Phosphatidylinositol transfer protein alpha isoform	Pitpna	Pitpna	Phosphatidylinositol transfer protein alpha isoform
0.915517	0.646422	-2.50094	0.384867	0.279651	0.393831	-0.274507	0.178676	-0.0235159		20	20	20	NaN	NaN	NaN	NaN	0	NaN	179590000000	1183	417	44538.5	26	0	P16617	P16617	Phosphoglycerate kinase 1	Pgk1	Pgk1	Phosphoglycerate kinase 1
0.499642	0.661206	0.317568	-1.09579	-0.0212719	-2.17943	0.497706	0.926438	0.393934		39	39	39	NaN	NaN	NaN	NaN	0	NaN	69402000000	1436	1100	120636	58	0	P16638	P16638	ATP-citrate synthase	Acly	Acly	ATP-citrate synthase
0.525946	0.107954	-1.29818	1.76649	-0.761914	0.0822274	0.942177	-0.182469	-1.18223		23	20	20	NaN	NaN	NaN	NaN	0	NaN	156190000000	1206	1072	115378	35	0	P16884	P16884	Neurofilament heavy polypeptide	Nefh	Nefh	Neurofilament heavy polypeptide
0.580053	0.290823	0.0581315	-1.44257	NaN	-1.68831	0.600983	0.828318	0.772577		8	8	8	NaN	NaN	NaN	NaN	0	NaN	1018600000	20	659	75315.5	39	0	P16970	P16970	ATP-binding cassette sub-family D member 3	Abcd3	Abcd3	ATP-binding cassette sub-family D member 3
-0.232139	-0.292604	-1.39059	1.26207	NaN	0.104331	-0.851384	-0.199216	1.59954		5	5	5	NaN	NaN	NaN	NaN	0	NaN	444520000	17	301	34295.9	13	0	P16975	P16975	SPARC	Sparc	Sparc	SPARC
-0.284952	-0.272222	0.141714	-1.08836	-0.672189	0.997354	2.08067	-0.929308	0.0273012		4	4	4	NaN	NaN	NaN	NaN	0	NaN	1062200000	44	145	16085.5	9	0	P17074	P17074	40S ribosomal protein S19	Rps19	Rps19	40S ribosomal protein S19
0.0798212	0.663342	1.34817	-1.53118	-0.434273	-1.40118	-0.221328	0.560262	0.936361		4	4	4	NaN	NaN	NaN	NaN	0	NaN	961390000	40	192	21893.4	9	0	P17077	P17077	60S ribosomal protein L9	Rpl9	Rpl9	60S ribosomal protein L9
-0.868093	-0.503987	NaN	-1.58353	0.711038	1.45422	-0.382378	0.710193	0.462537		3	3	3	NaN	NaN	NaN	NaN	0	NaN	473330000	14	462	53486.5	17	0	P17164	P17164	Tissue alpha-L-fucosidase	Fuca1	Fuca1	Tissue alpha-L-fucosidase
-1.05075	0.792109	0.243798	-1.18191	0.692782	-0.994658	-0.770248	1.43081	0.838063		5	5	5	NaN	NaN	NaN	NaN	0	NaN	1318700000	55	234	25926.6	13	0	P17220	P17220	Proteasome subunit alpha type-2	Psma2	Psma2	Proteasome subunit alpha type-2
0.766999	0.825625	0.651021	-2.07773	0.0156891	-1.23964	0.124639	0.490849	0.442547		5	5	5	NaN	NaN	NaN	NaN	0	NaN	5035300000	81	395	41987.8	12	0	P17256	P17256	Mevalonate kinase	Mvk	Mvk	Mevalonate kinase
0.0245455	0.0874785	-0.487223	-1.34807	-0.931607	-0.866281	1.0917	1.51118	0.918282		19	19	18	NaN	NaN	NaN	NaN	0	NaN	36159000000	509	520	57433.8	25	0	P17425	P17425	Hydroxymethylglutaryl-CoA synthase, cytoplasmic	Hmgcs1	Hmgcs1	Hydroxymethylglutaryl-CoA synthase, cytoplasmic
-1.0537	-1.15636	-1.2435	0.343132	1.28638	1.30545	-0.132078	0.712914	-0.0622344		11	11	11	NaN	NaN	NaN	NaN	0	268	43410000000	376	411	46135.8	20	0	P17475	P17475	Alpha-1-antiproteinase	Serpina1	Serpina1	Alpha-1-antiproteinase
0.528391	0.950171	1.05548	-2.17925	-0.0814713	-0.888326	0.0803147	0.197879	0.33681		12	12	12	NaN	NaN	NaN	NaN	0	NaN	16109000000	317	424	44695	22	0	P17764	P17764	Acetyl-CoA acetyltransferase, mitochondrial	Acat1	Acat1	Acetyl-CoA acetyltransferase, mitochondrial
0.169772	1.49526	1.2927	-0.84725	NaN	-1.31521	-0.168884	-0.755903	0.129516		8	8	8	NaN	NaN	NaN	NaN	0	NaN	974330000	34	593	66640.4	24	0	P18088	P18088	Glutamate decarboxylase 1	Gad1	Gad1	Glutamate decarboxylase 1
0.372062	0.218509	0.793002	-1.37467	-0.900439	-1.48101	0.303579	0.863294	1.20567		17	17	17	NaN	NaN	NaN	NaN	0	NaN	4033000000	101	699	78178.7	37	0	P18163;O88813	P18163	Long-chain-fatty-acid--CoA ligase 1	Acsl1	Acsl1	Long-chain-fatty-acid--CoA ligase 1
0.274075	0.857169	1.36432	-1.59413	0.324619	-1.37213	-0.657101	0.251471	0.551704		10	10	6	NaN	NaN	NaN	NaN	0	NaN	2604500000	115	483	51026.9	19	0	P18265	P18265	Glycogen synthase kinase-3 alpha	Gsk3a	Gsk3a	Glycogen synthase kinase-3 alpha
0.488615	0.768411	1.38437	-1.31601	-0.762107	-0.695134	-1.12353	0.175976	1.07941		10	6	6	NaN	NaN	NaN	NaN	0	NaN	2658800000	74	420	46742.4	23	0	P18266	P18266	Glycogen synthase kinase-3 beta	Gsk3b	Gsk3b	Glycogen synthase kinase-3 beta
-0.282568	-0.849669	-0.820633	-1.04248	2.03266	0.396506	-0.251506	1.02183	-0.204146		16	16	16	NaN	NaN	NaN	NaN	0	NaN	2782200000	63	617	70411.8	28	0	P18292;CON__P00735	P18292	Prothrombin;Activation peptide fragment 1;Activation peptide fragment 2;Thrombin light chain;Thrombin heavy chain	F2	F2	Prothrombin
-0.0626344	0.407283	0.627418	-0.858859	2.04307	0.228887	-1.2814	-0.219301	-0.88447		7	7	7	NaN	NaN	NaN	NaN	0	NaN	5973200000	86	262	28128.3	11	0	P18297	P18297	Sepiapterin reductase	Spr	Spr	Sepiapterin reductase
-0.352276	0.642807	0.914518	-1.88412	-1.0028	0.422104	-0.472192	1.15741	0.574551		7	7	6	NaN	NaN	NaN	NaN	0	NaN	5607800000	81	395	43715.7	18	0	P18298	P18298	S-adenosylmethionine synthase isoform type-2	Mat2a	Mat2a	S-adenosylmethionine synthase isoform type-2
0.603555	0.363914	0.727816	-0.935223	NaN	-2.02524	-0.125259	0.608656	0.781781		10	10	10	NaN	NaN	NaN	NaN	0	NaN	1036900000	63	798	88894.6	46	0	P18395	P18395	Cold shock domain-containing protein E1	Csde1	Csde1	Cold shock domain-containing protein E1
-0.544853	-0.448293	-0.914937	1.84013	-0.264035	1.47747	-0.882573	0.194774	-0.457684		13	13	13	NaN	NaN	NaN	NaN	0	NaN	27978000000	503	416	47995.5	24	0	P18418	P18418	Calreticulin	Calr	Calr	Calreticulin
0.126619	-0.348216	-0.230127	-0.773777	1.96565	-0.960579	-1.19126	0.772973	0.638712		8	8	8	43	43	43	NaN	0	NaN	8469800000	171	263	29517.5	17	0	P18420	P18420	Proteasome subunit alpha type-1	Psma1	Psma1	Proteasome subunit alpha type-1
0.0667042	0.536213	-0.793139	-1.4174	1.94055	-1.01635	0.180014	0.488487	0.0149229		6	6	6	NaN	NaN	NaN	NaN	0	NaN	4393000000	113	240	26479.3	13	0	P18421	P18421	Proteasome subunit beta type-1	Psmb1	Psmb1	Proteasome subunit beta type-1
-0.580045	-0.253559	0.700626	-0.496064	2.02411	-0.721981	-1.37011	0.0996222	0.597404		8	8	8	NaN	NaN	NaN	NaN	0	NaN	4238400000	82	255	28419.2	13	0	P18422	P18422	Proteasome subunit alpha type-3	Psma3	Psma3	Proteasome subunit alpha type-3
NaN	NaN	NaN	NaN	NaN	NaN	-1.0999	0.245525	0.85437		2	2	2	NaN	NaN	NaN	NaN	0	NaN	276940000	7	148	16618.5	7	0	P18445	P18445	60S ribosomal protein L27a	Rpl27a	Rpl27a	60S ribosomal protein L27a
0.829806	0.532964	0.530155	-1.50739	1.05134	-1.55873	-0.734095	0.558129	0.297828		30	30	30	NaN	NaN	NaN	NaN	0	NaN	34287000000	562	938	104045	50	0	P18484	P18484	AP-2 complex subunit alpha-2	Ap2a2	Ap2a2	AP-2 complex subunit alpha-2
-0.172796	-0.976746	NaN	1.69228	NaN	NaN	-0.321494	NaN	-0.221241		3	3	3	NaN	NaN	NaN	NaN	NaN	NaN	111320000	5	1180	130809	44	0	P18614	P18614	Integrin alpha-1	Itga1	Itga1	Integrin alpha-1
1.11508	1.19967	0.86065	-0.956169	0.300548	-1.62246	-0.519264	-0.73612	0.358069		6	6	6	NaN	NaN	NaN	NaN	0	NaN	880510000	29	347	38224.8	19	0	P18645	P18645	UDP-glucose 4-epimerase	Gale	Gale	UDP-glucose 4-epimerase
0.301272	-0.80784	-0.718432	1.57758	-1.41214	0.878731	0.521398	0.589837	-0.930403		8	8	5	NaN	NaN	NaN	NaN	0	NaN	3629900000	92	172	19866.8	9.5	0	P18666;P13832	P18666;P13832	Myosin regulatory light chain 12B;Myosin regulatory light chain RLC-A	Myl12b;Rlc-a	Myl12b;Rlc-a	Myosin regulatory light chain 12B;Myosin regulatory light chain RLC-A
0.0142922	0.169715	1.85243	NaN	NaN	NaN	-0.390983	-0.694555	-0.950901		4	4	4	NaN	NaN	NaN	NaN	NaN	NaN	2537000000	23	398	43605.3	24	0	P18757	P18757	Cystathionine gamma-lyase	Cth	Cth	Cystathionine gamma-lyase
0.53416	0.982966	1.27429	-0.88677	-1.17225	-1.46089	-0.415693	0.607553	0.536642		9	9	9	NaN	NaN	NaN	NaN	0	NaN	1534400000	53	658	74110.3	32	0	P18886	P18886	Carnitine O-palmitoyltransferase 2, mitochondrial	Cpt2	Cpt2	Carnitine O-palmitoyltransferase 2, mitochondrial
-0.000285462	-0.1449	-0.832857	-0.305282	-1.27652	-0.976705	1.71265	0.990157	0.83374		4	4	4	NaN	NaN	NaN	NaN	0	NaN	1583700000	44	182	21126.7	12	0	P19132	P19132	Ferritin heavy chain;Ferritin heavy chain, N-terminally processed	Fth1	Fth1	Ferritin heavy chain
-1.07888	-1.20374	-0.064292	-1.15996	0.946961	0.247405	-0.158869	1.22175	1.24961		8	8	8	NaN	NaN	NaN	NaN	0	NaN	2316200000	76	391	45073.5	18	0	P19139	P19139	Casein kinase II subunit alpha	Csnk2a1	Csnk2a1	Casein kinase II subunit alpha
-0.782241	-0.749137	-0.694079	1.53536	-1.13976	1.61669	0.0828657	0.237919	-0.107624		9	9	9	48	48	48	NaN	0	NaN	5438800000	170	248	27378.3	15	0	P19234	P19234	NADH dehydrogenase [ubiquinone] flavoprotein 2, mitochondrial	Ndufv2	Ndufv2	NADH dehydrogenase [ubiquinone] flavoprotein 2, mitochondrial
-0.289855	-0.0137972	-0.677512	2.202	-0.651715	0.719582	0.383984	-0.592337	-1.08035		9	9	9	NaN	NaN	NaN	NaN	0	NaN	1467200000	53	752	78564	30	0	P19332	P19332	Microtubule-associated protein tau	Mapt	Mapt	Microtubule-associated protein tau
0.292976	0.128419	-0.25585	-0.177227	2.43377	-0.0949752	-0.648279	-0.699727	-0.97911		13	13	13	NaN	NaN	NaN	NaN	0	NaN	3378400000	103	637	72619.3	29	0	P19468	P19468	Glutamate--cysteine ligase catalytic subunit	Gclc	Gclc	Glutamate--cysteine ligase catalytic subunit
NaN	-0.331043	NaN	-0.792502	NaN	NaN	NaN	NaN	1.12354		3	2	2	5	NaN	NaN	NaN	NaN	NaN	128070000	5	883	98687.9	43	0	P19491	P19491	Glutamate receptor 2	Gria2	Gria2	Glutamate receptor 2
0.0509882	-1.13926	1.01589	0.232805	NaN	0.433571	-1.58125	-0.354186	1.34144		4	4	3	NaN	NaN	NaN	NaN	0	NaN	629680000	20	888	100373	41	0	P19492	P19492	Glutamate receptor 3	Gria3	Gria3	Glutamate receptor 3
0.499284	0.3711	NaN	-0.439153	NaN	-1.88019	0.17712	1.35871	-0.086871		3	2	2	NaN	4	4	NaN	NaN	NaN	225700000	3	902	100758	43	0	P19493	P19493	Glutamate receptor 4	Gria4	Gria4	Glutamate receptor 4
1.55178	0.0306044	0.832255	-0.757777	0.075077	-1.78093	-0.835453	0.612105	0.272333		8	8	8	NaN	NaN	NaN	NaN	0	NaN	19590000000	241	256	28868.8	17	0	P19511	P19511	ATP synthase F(0) complex subunit B1, mitochondrial	Atp5f1	Atp5f1	ATP synthase F(0) complex subunit B1, mitochondrial
0.0287982	-0.264867	-2.02714	1.61354	-0.280207	0.875595	0.43602	0.0415527	-0.423289		42	38	38	74	NaN	NaN	NaN	0	NaN	502020000000	3437	542	61335.3	37	0	P19527	P19527	Neurofilament light polypeptide	Nefl	Nefl	Neurofilament light polypeptide
0.419641	0.496695	1.40088	-1.25733	-0.594693	-1.1551	-0.972264	0.733099	0.929079		11	11	11	NaN	NaN	NaN	NaN	0	NaN	2809400000	113	355	40879.7	17	0	P19627	P19627	Guanine nucleotide-binding protein G(z) subunit alpha	Gnaz	Gnaz	Guanine nucleotide-binding protein G(z) subunit alpha
0.123393	0.67017	1.02184	-1.58945	0.101176	-1.29437	0.393945	-0.703298	1.27659		10	10	10	NaN	NaN	NaN	NaN	0	NaN	5165700000	94	520	58458.7	28	0	P19643	P19643	Amine oxidase [flavin-containing] B	Maob	Maob	Amine oxidase [flavin-containing] B
0.909137	0.203006	0.96293	-1.84719	0.525254	-1.34948	-0.378985	0.291875	0.683452		11	5	5	75	NaN	NaN	NaN	0	NaN	19288000000	173	152	17283	11	0	P19804	P19804	Nucleoside diphosphate kinase B	Nme2	Nme2	Nucleoside diphosphate kinase B
-0.29387	-0.572535	NaN	0.678968	-1.64583	-0.0895921	1.47956	0.970213	-0.526922		2	2	2	NaN	NaN	NaN	NaN	0	NaN	545080000	13	114	11497.9	3	0	P19944	P19944	60S acidic ribosomal protein P1	Rplp1	Rplp1	60S acidic ribosomal protein P1
-0.860256	0.0415392	0.0327324	-1.52002	-0.0560622	-0.764346	0.189191	1.39813	1.53908		6	6	6	NaN	NaN	NaN	NaN	0	NaN	2064300000	51	317	34215.5	13	0	P19945	P19945	60S acidic ribosomal protein P0	Rplp0	Rplp0	60S acidic ribosomal protein P0
-1.07811	-1.11544	-1.12088	0.0870881	1.6154	0.903466	-0.201244	0.928911	-0.019198		24	24	24	NaN	NaN	NaN	NaN	0	NaN	49123000000	669	460	51350.9	25	0	P20059	P20059	Hemopexin	Hpx	Hpx	Hemopexin
0.226955	0.642055	0.780759	NaN	NaN	-2.01094	-0.373631	0.853837	-0.119039		7	7	7	NaN	NaN	NaN	NaN	0	NaN	763300000	14	524	58607.5	34	0	P20069	P20069	Mitochondrial-processing peptidase subunit alpha	Pmpca	Pmpca	Mitochondrial-processing peptidase subunit alpha
0.659139	-0.0150381	1.37346	-0.524567	-0.696489	-1.87062	-0.405203	0.455865	1.02345		11	11	11	NaN	NaN	NaN	NaN	0	NaN	9114000000	187	301	34174.6	15	0	P20070	P20070	NADH-cytochrome b5 reductase 3;NADH-cytochrome b5 reductase 3 membrane-bound form;NADH-cytochrome b5 reductase 3 soluble form	Cyb5r3	Cyb5r3	NADH-cytochrome b5 reductase 3
-1.15345	0.239889	-0.234389	0.00243078	-0.909756	0.200968	2.19208	-0.811836	0.474058		11	11	3	NaN	NaN	19	NaN	0	NaN	4422400000	166	189	21298.1	10	0	P20171	P20171	GTPase HRas;GTPase HRas, N-terminally processed	Hras	Hras	GTPase HRas
0.515122	-0.79045	NaN	1.64532	NaN	-1.06822	0.624877	-0.933349	0.00669442		5	5	5	NaN	NaN	NaN	NaN	0	NaN	797520000	22	200	22854.1	9	0	P20294	P20294	Ciliary neurotrophic factor	Cntf	Cntf	Ciliary neurotrophic factor
-1.59987	-0.50258	0.992297	NaN	NaN	NaN	-0.256571	0.364486	1.00224		3	3	3	NaN	NaN	NaN	NaN	0	NaN	152660000	6	619	70456.4	40	0	P20595	P20595	Guanylate cyclase soluble subunit beta-1	Gucy1b3	Gucy1b3	Guanylate cyclase soluble subunit beta-1
-1.29899	-0.779574	1.71152	-0.189038	NaN	NaN	-0.183612	0.834905	-0.0952125		5	5	5	NaN	NaN	NaN	NaN	NaN	NaN	490190000	14	423	48319.6	17	0	P20611	P20611	Lysosomal acid phosphatase	Acp2	Acp2	Lysosomal acid phosphatase
0.547259	-0.544966	-0.649601	1.71644	-0.225902	1.44041	-0.430619	-0.866247	-0.986778		15	15	14	NaN	NaN	NaN	NaN	0	NaN	10922000000	296	382	42416.7	22	0	P20650	P20650	Protein phosphatase 1A	Ppm1a	Ppm1a	Protein phosphatase 1A
0.524002	1.25276	0.846967	-1.44773	-1.34882	-0.935603	0.436588	-0.0044922	0.676337		12	6	6	NaN	NaN	NaN	NaN	0	NaN	1441100000	47	525	59113.4	25	0	P20651	P20651	Serine/threonine-protein phosphatase 2B catalytic subunit beta isoform	Ppp3cb	Ppp3cb	Serine/threonine-protein phosphatase 2B catalytic subunit beta isoform
-0.229709	-0.568688	1.77086	NaN	NaN	NaN	-0.399547	NaN	-0.572918		3	3	3	8	8	8	NaN	0	NaN	264360000	5	461	51549.9	24	0	P20673	P20673	Argininosuccinate lyase	Asl	Asl	Argininosuccinate lyase
1.02861	0.438901	0.27455	0.123041	1.11039	-2.15543	-0.847919	0.18798	-0.160125		20	20	20	38	38	38	NaN	0	NaN	25788000000	476	665	75356.4	30	0	P20717	P20717	Protein-arginine deiminase type-2	Padi2	Padi2	Protein-arginine deiminase type-2
-1.15333	-1.14796	-0.802441	-0.422567	1.33508	0.500721	-0.219836	1.51346	0.396884		10	7	7	NaN	NaN	NaN	NaN	0	NaN	7965200000	97	326	35945.7	14	0	P20759	P20759	Ig gamma-1 chain C region			Ig gamma-1 chain C region
-1.18078	-1.2182	-0.927501	-0.322393	1.57888	0.463046	0.071613	1.13271	0.402632		13	13	10	NaN	NaN	NaN	NaN	0	NaN	40685000000	481	322	35185.9	16	0	P20760	P20760	Ig gamma-2A chain C region	Igg-2a	Igg-2a	Ig gamma-2A chain C region
-1.14398	-1.05577	-1.10308	-0.408001	1.20587	0.344665	0.124057	1.53386	0.502372		5	5	5	NaN	NaN	NaN	NaN	0	NaN	30386000000	334	333	36497.4	10	0	P20761	P20761	Ig gamma-2B chain C region	Igh-1a	Igh-1a	Ig gamma-2B chain C region
NaN	NaN	-1.45817	NaN	0.800473	-0.772788	-0.27117	1.09002	0.611639		8	8	8	NaN	NaN	NaN	NaN	0	NaN	1117700000	28	329	36571.6	15	0	P20762	P20762	Ig gamma-2C chain C region			Ig gamma-2C chain C region
NaN	-1.45666	-1.27451	-0.261982	-0.153661	1.05867	0.252169	1.29992	0.53605		4	4	4	NaN	NaN	NaN	NaN	0	NaN	1608500000	52	104	11317.6	7	0	P20767	P20767	Ig lambda-2 chain C region			Ig lambda-2 chain C region
NaN	NaN	NaN	NaN	NaN	NaN	NaN	0.707107	-0.707107		4	4	4	NaN	NaN	NaN	NaN	0	NaN	253820000	8	496	55927	23	0	P20781	P20781	Glycine receptor subunit beta	Glrb	Glrb	Glycine receptor subunit beta
0.844494	0.832642	1.0111	-1.1735	-1.6262	-0.48945	-0.627359	0.329423	0.898846		10	10	10	NaN	NaN	NaN	NaN	0	NaN	17424000000	247	274	29445.7	15	0	P20788	P20788	Cytochrome b-c1 complex subunit Rieske, mitochondrial;Cytochrome b-c1 complex subunit 11	Uqcrfs1	Uqcrfs1	Cytochrome b-c1 complex subunit Rieske, mitochondrial
NaN	NaN	NaN	NaN	0.809924	NaN	NaN	0.307792	-1.11772		5	5	5	NaN	NaN	NaN	NaN	0	NaN	229240000	12	402	45009.8	22	0	P20961	P20961	Plasminogen activator inhibitor 1	Serpine1	Serpine1	Plasminogen activator inhibitor 1
-0.134113	1.03146	1.85152	0.465633	0.0323343	-0.83855	-1.41161	-0.697912	-0.298761		10	10	10	NaN	NaN	NaN	NaN	0	NaN	741370000	49	1040	115971	44	0	P21139	P21139	Alpha-mannosidase 2C1	Man2c1	Man2c1	Alpha-mannosidase 2C1
NaN	NaN	NaN	0.707107	NaN	NaN	NaN	NaN	-0.707107		5	5	5	NaN	NaN	NaN	NaN	NaN	NaN	519990000	7	1893	208797	95	0	P21263	P21263	Nestin	Nes	Nes	Nestin
0.653553	0.733879	1.35966	-1.7538	-0.153115	-1.38201	-0.0411937	0.242713	0.340311		14	14	14	NaN	NaN	NaN	NaN	0	NaN	13759000000	373	526	59507.8	27	0	P21396	P21396	Amine oxidase [flavin-containing] A	Maoa	Maoa	Amine oxidase [flavin-containing] A
-1.50128	-0.193875	0.569367	NaN	0.189203	-1.31599	-0.0228713	1.2548	1.02064		5	5	5	NaN	NaN	NaN	NaN	0	NaN	393110000	19	403	46136	19	0	P21531	P21531	60S ribosomal protein L3	Rpl3	Rpl3	60S ribosomal protein L3
-0.299303	-0.725264	NaN	NaN	NaN	NaN	-1.04883	0.777009	1.29639		2	2	2	NaN	NaN	NaN	NaN	NaN	NaN	467150000	24	298	33561.7	14	0	P21533	P21533	60S ribosomal protein L6	Rpl6	Rpl6	60S ribosomal protein L6
-0.285149	0.0243371	-0.621668	1.93693	-1.13995	1.11221	0.427438	-0.768461	-0.685689		6	6	6	NaN	NaN	NaN	NaN	0	NaN	4489200000	86	108	12494.4	5	0	P21571	P21571	ATP synthase-coupling factor 6, mitochondrial	Atp5j	Atp5j	ATP synthase-coupling factor 6, mitochondrial
0.303032	0.890573	1.46691	-1.13841	0.699281	-1.50827	-0.919693	0.237867	-0.0312909		40	40	33	NaN	NaN	NaN	NaN	0	NaN	90259000000	1371	864	97294.9	47	0	P21575	P21575	Dynamin-1	Dnm1	Dnm1	Dynamin-1
0.28279	0.861516	2.08536	0.132833	-0.918565	-0.345218	-1.20044	-0.404414	-0.493857		9	9	9	NaN	NaN	NaN	NaN	0	NaN	1484500000	42	576	63968.7	28	0	P21588	P21588	5-nucleotidase	Nt5e	Nt5e	5'-nucleotidase
0.506351	0.646226	-1.15496	-0.697159	0.0678117	-1.16539	0.117409	-0.326079	2.00579		6	6	6	36	36	36	NaN	0	NaN	2324600000	66	261	29497.8	13	0	P21670	P21670	Proteasome subunit alpha type-4	Psma4	Psma4	Proteasome subunit alpha type-4
0.242491	0.0311844	1.41544	-0.957577	1.31102	-1.59818	-0.736205	-0.13893	0.430754		12	7	7	NaN	NaN	NaN	NaN	0	NaN	3697800000	91	421	47399	20	0	P21707;P47861	P21707	Synaptotagmin-1	Syt1	Syt1	Synaptotagmin-1
0.611967	0.598024	-0.285256	-1.5859	1.21792	-1.6651	0.358138	0.42931	0.320892		15	13	13	NaN	NaN	NaN	NaN	0	NaN	25036000000	288	380	43080.5	22	0	P21708	P21708	Mitogen-activated protein kinase 3	Mapk3	Mapk3	Mitogen-activated protein kinase 3
0.211711	0.591641	-0.0395308	-1.0422	-1.36327	-1.25444	1.26841	0.538419	1.08926		13	13	13	NaN	NaN	NaN	NaN	0	NaN	5595100000	147	424	43826.7	22	0	P21775;P07871	P21775;P07871	3-ketoacyl-CoA thiolase A, peroxisomal;3-ketoacyl-CoA thiolase B, peroxisomal	Acaa1a;Acaa1b	Acaa1a;Acaa1b	3-ketoacyl-CoA thiolase A, peroxisomal;3-ketoacyl-CoA thiolase B, peroxisomal
-0.0433097	-1.06228	-0.137794	1.94749	-0.716643	1.10816	0.415062	-0.794425	-0.716251		24	21	21	NaN	NaN	NaN	NaN	0	NaN	35658000000	467	468	53549.8	32	0	P21807	P21807	Peripherin	Prph	Prph	Peripherin
0.10562	0.164163	0.399406	-0.353385	-1.86188	-0.982468	1.06134	0.0115027	1.4557		9	9	9	NaN	NaN	NaN	NaN	0	NaN	6807200000	186	282	31829.9	18	0	P21913	P21913	Succinate dehydrogenase [ubiquinone] iron-sulfur subunit, mitochondrial	Sdhb	Sdhb	Succinate dehydrogenase [ubiquinone] iron-sulfur subunit, mitochondrial
0.0887704	-0.669837	0.444678	0.0690854	1.72715	0.20622	-0.115049	0.301156	-2.05217		9	9	9	NaN	NaN	NaN	NaN	0	NaN	7900900000	190	227	24641.4	12	0	P22062	P22062	Protein-L-isoaspartate(D-aspartate) O-methyltransferase	Pcmt1	Pcmt1	Protein-L-isoaspartate(D-aspartate) O-methyltransferase
0.516248	-0.589273	0.0955204	0.0984097	-0.741729	1.56021	1.11781	-1.74186	-0.315344		22	22	22	NaN	NaN	NaN	NaN	0	NaN	7716600000	213	1040	113043	51	0	P22063	P22063	Contactin-2	Cntn2	Cntn2	Contactin-2
0.153945	0.600934	-0.804962	1.19665	1.62176	-0.144373	-1.49057	-0.46613	-0.66725		6	6	6	NaN	NaN	NaN	NaN	0	NaN	1502600000	56	264	29597.4	16	0	P22734	P22734	Catechol O-methyltransferase	Comt	Comt	Catechol O-methyltransferase
0.842634	0.57354	-1.39356	-1.33496	NaN	NaN	0.366392	1.04535	-0.0993942		4	3	3	NaN	NaN	NaN	NaN	0	NaN	252910000	11	1234	136636	47	0	P23347	P23347	Anion exchange protein 2	Slc4a2	Slc4a2	Anion exchange protein 2
-0.155587	-0.522321	-1.08623	-0.0473945	NaN	2.32841	-0.0906157	-0.201181	-0.225077		5	5	4	NaN	NaN	NaN	NaN	0	NaN	255010000	33	1227	135407	49	0	P23348	P23348	Anion exchange protein 3	Slc4a3	Slc4a3	Anion exchange protein 3
-1.06304	-0.331781	-0.0180822	1.28173	-1.71608	0.191146	0.517261	-0.211353	1.3502		5	5	5	NaN	NaN	NaN	NaN	0	NaN	5203300000	82	165	17845.6	9	0	P23358	P23358	60S ribosomal protein L12	Rpl12	Rpl12	60S ribosomal protein L12
-0.872246	-0.033127	1.13224	-0.840518	-1.47014	-0.41008	0.0902791	1.09362	1.30997		16	16	16	NaN	NaN	NaN	NaN	0	NaN	2770800000	88	953	107011	48	0	P23514	P23514	Coatomer subunit beta	Copb1	Copb1	Coatomer subunit beta
-0.892768	-0.945559	-0.874467	0.0161383	1.98498	0.888023	-0.551373	0.657021	-0.281993		26	26	26	NaN	NaN	NaN	NaN	0	NaN	24495000000	287	927	103173	40	0	P23562	P23562	Band 3 anion transport protein	Slc4a1	Slc4a1	Band 3 anion transport protein
-0.190275	-0.274895	-0.361418	1.772	-1.37366	1.15017	0.573664	-0.301807	-0.993778		26	21	21	NaN	43	43	NaN	0	NaN	128220000000	1025	505	56115.4	34	0	P23565	P23565	Alpha-internexin	Ina	Ina	Alpha-internexin
0.880797	-0.661489	-1.68992	0.232261	0.0932604	0.269407	1.81094	-0.666028	-0.269232		6	6	6	36	36	36	NaN	0	NaN	24577000000	308	189	21634.9	9	0	P23593	P23593	Apolipoprotein D	Apod	Apod	Apolipoprotein D
-0.0818034	-0.278152	-1.49542	0.00451514	-0.128744	-0.860769	2.08845	0.748665	0.00326479		12	12	12	NaN	NaN	NaN	NaN	0	NaN	7411800000	199	315	35762.5	18	0	P23711	P23711	Heme oxygenase 2	Hmox2	Hmox2	Heme oxygenase 2
-1.02107	-0.921598	-0.807969	-0.671291	1.83906	0.340362	-0.214456	1.17529	0.28168		6	6	6	NaN	NaN	NaN	NaN	0	NaN	1765600000	45	226	25274.2	11	0	P23764;Q64625	P23764	Glutathione peroxidase 3	Gpx3	Gpx3	Glutathione peroxidase 3
-1.34181	-0.931839	-0.595211	1.65125	1.12828	0.674717	-0.715548	0.0933047	0.0368527		7	7	7	NaN	NaN	NaN	NaN	0	NaN	3578400000	80	175	20088.8	11	0	P23928	P23928	Alpha-crystallin B chain	Cryab	Cryab	Alpha-crystallin B chain
0.61601	1.33376	0.963208	-0.230845	-0.417148	-1.96579	-0.130581	-0.71317	0.544552		5	5	5	NaN	NaN	NaN	NaN	0	NaN	2731900000	100	289	32254.4	19	0	P23965	P23965	Enoyl-CoA delta isomerase 1, mitochondrial	Eci1	Eci1	Enoyl-CoA delta isomerase 1, mitochondrial
0.637843	-1.1986	-0.319108	1.64977	-1.17158	-0.872175	0.460496	-0.166395	0.979749		6	6	6	18	18	18	NaN	0	NaN	11585000000	153	599	67001.5	18	0	P23978	P23978	Sodium- and chloride-dependent GABA transporter 1	Slc6a1	Slc6a1	Sodium- and chloride-dependent GABA transporter 1
-0.936404	-0.10387	1.18782	-1.51966	NaN	-0.142225	-0.254041	0.274376	1.494		3	3	3	NaN	NaN	NaN	NaN	0	NaN	752470000	36	204	22878.3	11	0	P24050	P24050	40S ribosomal protein S5;40S ribosomal protein S5, N-terminally processed	Rps5	Rps5	40S ribosomal protein S5
-0.57394	-0.422436	NaN	-1.07856	NaN	NaN	-0.430274	1.19923	1.30598		2	2	2	NaN	NaN	NaN	NaN	0	NaN	434200000	18	84	9469.14	4	0	P24051;Q71TY3	P24051;Q71TY3	40S ribosomal protein S27-like;40S ribosomal protein S27	Rps27l;Rps27	Rps27l;Rps27	40S ribosomal protein S27-like;40S ribosomal protein S27
0.0729094	-0.589993	-0.42826	2.16019	-0.162147	1.01078	-0.33663	-1.1322	-0.59465		10	10	10	NaN	NaN	NaN	NaN	0	NaN	4105800000	132	634	70633.8	36	0	P24054	P24054	SPARC-like protein 1	Sparcl1	Sparcl1	SPARC-like protein 1
-1.03153	-1.09613	-1.17614	0.0973689	1.58515	1.09133	-0.175721	0.775988	-0.0703151		5	5	5	NaN	NaN	NaN	NaN	0	NaN	32728000000	205	352	37982.3	12	0	P24090	P24090	Alpha-2-HS-glycoprotein	Ahsg	Ahsg	Alpha-2-HS-glycoprotein
1.55576	0.95148	0.0627214	0.233573	0.57895	-0.196216	-1.65314	-1.17522	-0.357903		23	23	23	NaN	NaN	NaN	NaN	0	NaN	9857900000	297	687	78385.5	40	0	P24155	P24155	Thimet oligopeptidase	Thop1	Thop1	Thimet oligopeptidase
0.0653991	0.0260502	0.266172	0.286306	1.00969	-2.51479	-0.0247849	0.672672	0.213285		11	11	11	NaN	NaN	NaN	NaN	0	NaN	16186000000	292	407	44680.7	19	0	P24268	P24268	Cathepsin D;Cathepsin D 12 kDa light chain;Cathepsin D 9 kDa light chain;Cathepsin D 34 kDa heavy chain;Cathepsin D 30 kDa heavy chain	Ctsd	Ctsd	Cathepsin D
0.621193	0.769845	1.14416	-1.55691	0.0258382	-1.26106	-0.834821	0.0961165	0.995636		10	10	10	NaN	NaN	NaN	NaN	0	NaN	22913000000	361	297	33406.7	14	0	P24329	P24329	Thiosulfate sulfurtransferase	Tst	Tst	Thiosulfate sulfurtransferase
0.959325	-0.0695592	-0.0547313	-0.657296	-2.32824	0.424887	0.622905	0.405417	0.697292		13	13	13	56	56	56	NaN	0	NaN	13758000000	247	216	23802.6	12	0	P24368	P24368	Peptidyl-prolyl cis-trans isomerase B	Ppib	Ppib	Peptidyl-prolyl cis-trans isomerase B
-0.228983	0.140684	1.79329	-1.53228	0.56785	-0.342451	-1.24012	0.547279	0.294734		9	9	9	NaN	NaN	NaN	NaN	0	NaN	4273700000	123	226	25493	16	0	P24473	P24473	Glutathione S-transferase kappa 1	Gstk1	Gstk1	Glutathione S-transferase kappa 1
0.149594	-1.55177	-0.275195	0.405571	2.12226	0.409139	-0.336358	-0.218015	-0.705228		8	8	8	18	18	18	NaN	0	NaN	10582000000	212	543	59697.5	16	0	P24942;O35921	P24942	Excitatory amino acid transporter 1	Slc1a3	Slc1a3	Excitatory amino acid transporter 1
-0.33124	1.3074	1.4673	-1.04258	0.291606	-1.53887	-0.611508	0.296441	0.161446		12	12	12	NaN	NaN	NaN	NaN	0	NaN	5438100000	116	419	45975.5	21	0	P25093	P25093	Fumarylacetoacetase	Fah	Fah	Fumarylacetoacetase
0.853861	0.947226	0.991357	-0.521022	0.897842	0.141163	-1.64462	-0.515769	-1.15004		12	12	12	48	48	48	NaN	0	NaN	59419000000	562	254	28832	13	0	P25113;P16290	P25113	Phosphoglycerate mutase 1	Pgam1	Pgam1	Phosphoglycerate mutase 1
1.11933	-0.805273	NaN	NaN	NaN	NaN	NaN	-0.314059	NaN		3	2	2	6	NaN	NaN	NaN	0	NaN	174140000	8	585	65857.3	24	0	P25122	P25122	Potassium voltage-gated channel subfamily C member 1	Kcnc1	Kcnc1	Potassium voltage-gated channel subfamily C member 1
-1.0023	-0.738586	0.830076	-1.23526	0.226859	-0.602074	0.143358	0.491381	1.88654		8	8	8	NaN	NaN	NaN	NaN	0	NaN	1549500000	48	631	69077.9	23	0	P25235	P25235	Dolichyl-diphosphooligosaccharide--protein glycosyltransferase subunit 2	Rpn2	Rpn2	Dolichyl-diphosphooligosaccharide--protein glycosyltransferase subunit 2
-0.23281	-0.281555	0.0707144	0.392189	-0.716041	2.48247	-0.749676	-0.529769	-0.435522		21	21	21	NaN	NaN	NaN	NaN	0	NaN	31714000000	527	838	96327.7	33	0	P25286	P25286	V-type proton ATPase 116 kDa subunit a isoform 1	Atp6v0a1	Atp6v0a1	V-type proton ATPase 116 kDa subunit a isoform 1
-1.24173	-0.421967	-0.33999	-0.607093	NaN	1.87713	NaN	0.406509	0.327139		3	3	3	NaN	NaN	NaN	NaN	0	NaN	168860000	13	1959	208646	86	0	P25304	P25304	Agrin;Agrin N-terminal 110 kDa subunit;Agrin C-terminal 110 kDa subunit;Agrin C-terminal 90 kDa fragment;Agrin C-terminal 22 kDa fragment	Agrn	Agrn	Agrin
0.707107	NaN	NaN	NaN	NaN	NaN	NaN	NaN	-0.707107		2	2	2	6	6	6	NaN	0	NaN	166600000	9	496	55109.5	23	0	P25409	P25409	Alanine aminotransferase 1	Gpt	Gpt	Alanine aminotransferase 1
0.0177112	0.785787	1.00622	-1.92053	0.346105	-1.33519	-0.133145	0.595824	0.637223		13	13	13	NaN	NaN	NaN	NaN	0	NaN	64027000000	641	418	47028.9	20	0	P25809;P09605	P25809	Creatine kinase U-type, mitochondrial	Ckmt1	Ckmt1	Creatine kinase U-type, mitochondrial
0.650179	-0.748697	-1.88959	1.0177	0.0325101	0.212228	1.44984	-0.354559	-0.369604		3	3	3	NaN	NaN	NaN	NaN	0	NaN	4804400000	86	503	55945.7	17	0	P26051	P26051	CD44 antigen	Cd44	Cd44	CD44 antigen
0.0564296	1.2598	1.29771	-1.59082	-0.314356	-1.07538	-0.642139	0.408002	0.600748		17	17	17	NaN	NaN	NaN	NaN	0	NaN	44176000000	469	390	43226.6	22	0	P26284	P26284	Pyruvate dehydrogenase E1 component subunit alpha, somatic form, mitochondrial	Pdha1	Pdha1	Pyruvate dehydrogenase E1 component subunit alpha, somatic form, mitochondrial
0.995721	-0.804293	1.30536	0.795568	-1.77962	0.0648767	0.507544	-0.482861	-0.602288		8	8	7	NaN	NaN	NaN	NaN	0	NaN	1623600000	51	820	91647.1	26	0	P26431	P26431	Sodium/hydrogen exchanger 1	Slc9a1	Slc9a1	Sodium/hydrogen exchanger 1
0.0602539	-0.337929	-1.04939	2.09	-0.255572	0.924118	0.177636	-0.515272	-1.09384		5	5	5	NaN	NaN	NaN	NaN	0	NaN	8047100000	145	388	42435.8	16	0	P26453	P26453	Basigin	Bsg	Bsg	Basigin
-1.27433	-1.56372	NaN	-0.173829	1.19932	0.834917	-0.202023	0.709304	0.470363		6	6	6	NaN	NaN	NaN	NaN	0	NaN	3622400000	102	297	33197.3	17	0	P26644;CON__P17690	P26644	Beta-2-glycoprotein 1	Apoh	Apoh	Beta-2-glycoprotein 1
-0.0934572	0.0707683	-0.844139	1.78366	-0.595663	1.1502	0.286842	-0.252002	-1.50621		4	4	4	NaN	NaN	NaN	NaN	0	NaN	7520300000	172	102	10901.7	8	0	P26772	P26772	10 kDa heat shock protein, mitochondrial	Hspe1	Hspe1	10 kDa heat shock protein, mitochondrial
-0.922321	-0.322842	1.18161	-0.0701117	1.59072	0.174806	-1.60157	0.493563	-0.523851		12	12	8	NaN	NaN	NaN	NaN	0	NaN	1449000000	41	689	79784.8	37	0	P26817	P26817	Beta-adrenergic receptor kinase 1	Adrbk1	Grk2	Beta-adrenergic receptor kinase 1
-0.600269	-0.391198	-0.334262	-0.233346	2.33069	0.4675	-1.08074	0.415407	-0.573788		9	9	9	NaN	NaN	NaN	NaN	0	NaN	27424000000	296	260	29113.8	13	0	P27139	P27139	Carbonic anhydrase 2	Ca2	Ca2	Carbonic anhydrase 2
0.284598	-0.616599	-0.908629	1.28991	NaN	0.943775	1.03453	-1.14192	-0.885662		2	2	2	NaN	NaN	NaN	NaN	0	NaN	12250000000	125	126	13790.3	9	0	P27274	P27274	CD59 glycoprotein	Cd59	Cd59	CD59 glycoprotein
0.576275	0.447454	1.56863	-0.923057	0.99615	-0.860289	-1.54556	-0.1399	-0.119706		8	8	8	NaN	NaN	NaN	NaN	0	NaN	11987000000	197	218	24477.2	12	0	P27605	P27605	Hypoxanthine-guanine phosphoribosyltransferase	Hprt1	Hprt1	Hypoxanthine-guanine phosphoribosyltransferase
-0.786982	-0.512574	-0.485586	1.74186	NaN	1.22173	0.360368	-0.913599	-0.625218		7	7	7	NaN	NaN	NaN	NaN	0	NaN	2337400000	72	478	54091	23	0	P27615	P27615	Lysosome membrane protein 2	Scarb2	Scarb2	Lysosome membrane protein 2
1.35271	1.25993	0.564122	-1.27919	-0.953554	-1.26963	-0.108309	0.240472	0.19344		18	18	18	NaN	NaN	NaN	NaN	0	NaN	8631900000	203	935	100996	49	0	P27653	P27653	C-1-tetrahydrofolate synthase, cytoplasmic;Methylenetetrahydrofolate dehydrogenase;Methenyltetrahydrofolate cyclohydrolase;Formyltetrahydrofolate synthetase;C-1-tetrahydrofolate synthase, cytoplasmic, N-terminally processed	Mthfd1	Mthfd1	C-1-tetrahydrofolate synthase, cytoplasmic
-1.04841	-0.596048	NaN	1.13322	NaN	NaN	0.511245	NaN	NaN		2	2	2	NaN	NaN	NaN	NaN	NaN	NaN	127170000	5	210	23683.7	9	0	P27682	P27682	Neuroendocrine protein 7B2;N-terminal peptide;C-terminal peptide	Scg5	Scg5	Neuroendocrine protein 7B2
-0.0767313	0.382225	2.09211	NaN	-0.477701	-0.649989	-0.0156373	0.0917382	-1.34601		10	3	3	NaN	NaN	NaN	NaN	0	NaN	620600000	15	351	40619.7	18	0	P27791	P27791	cAMP-dependent protein kinase catalytic subunit alpha	Prkaca	Prkaca	cAMP-dependent protein kinase catalytic subunit alpha
1.39531	1.17565	0.378702	-0.20977	0.784114	-0.512802	-1.62657	-0.718722	-0.665917		6	6	6	NaN	NaN	NaN	NaN	0	NaN	3025700000	105	357	38234.5	19	0	P27867	P27867	Sorbitol dehydrogenase	Sord	Sord	Sorbitol dehydrogenase
0.13494	-0.454971	1.26926	NaN	NaN	-1.62284	-0.594606	0.202601	1.06562		6	6	6	NaN	NaN	NaN	NaN	0	NaN	1015400000	21	293	31231.3	18	0	P27952	P27952	40S ribosomal protein S2	Rps2	Rps2	40S ribosomal protein S2
-1.1574	-0.0974219	0.887074	-1.3828	1.56358	-0.174819	-0.855336	0.562499	0.654626		34	34	34	NaN	NaN	NaN	NaN	0	NaN	15628000000	375	1280	141930	63	0	P28023	P28023	Dynactin subunit 1	Dctn1	Dctn1	Dynactin subunit 1
0.0471098	0.663834	0.730893	-0.936022	-0.501892	-2.0024	0.0907869	1.12319	0.784499		38	38	38	NaN	NaN	NaN	NaN	0	NaN	25602000000	581	902	98874.2	59	0	P28037	P28037	Cytosolic 10-formyltetrahydrofolate dehydrogenase	Aldh1l1	Aldh1l1	Cytosolic 10-formyltetrahydrofolate dehydrogenase
-1.41311	0.885174	-0.984882	-0.480318	-1.05831	1.12308	0.281137	1.1413	0.505923		4	4	4	NaN	NaN	NaN	NaN	0	NaN	4183000000	66	238	25289.6	11	0	P28073	P28073	Proteasome subunit beta type-6	Psmb6	Psmb6	Proteasome subunit beta type-6
0.139756	0.272388	0.340882	-1.17136	0.520351	-1.75519	-0.646983	1.11431	1.18585		6	6	6	NaN	NaN	NaN	NaN	0	NaN	4154700000	59	263	28585.4	16	0	P28075	P28075	Proteasome subunit beta type-5	Psmb5	Psmb5	Proteasome subunit beta type-5
0.209642	0.923724	0.999986	-0.639538	-0.0581578	-1.70204	-1.27004	0.778066	0.758354		20	20	20	48	48	48	NaN	0	NaN	19602000000	469	556	60359.6	31	0	P28480	P28480	T-complex protein 1 subunit alpha	Tcp1	Tcp1	T-complex protein 1 subunit alpha
0.992145	-0.879748	-0.490343	1.67659	-1.18962	0.466664	0.336138	-1.17307	0.261239		6	6	6	NaN	NaN	NaN	NaN	0	NaN	20145000000	251	638	71060.9	17	0	P28572	P28572	Sodium- and chloride-dependent glycine transporter 1	Slc6a9	Slc6a9	Sodium- and chloride-dependent glycine transporter 1
NaN	-0.580639	NaN	NaN	NaN	NaN	NaN	-0.574056	1.15469		3	3	2	NaN	NaN	3	NaN	NaN	NaN	2772500000	3	1244	142667	63	0	P28818	P28818	Ras-specific guanine nucleotide-releasing factor 1	Rasgrf1	Rasgrf1	Ras-specific guanine nucleotide-releasing factor 1
1.37091	0.530555	-0.0290543	1.24761	-1.09617	0.640317	-1.02731	-1.18931	-0.447545		12	12	12	NaN	NaN	NaN	NaN	0	NaN	3232400000	112	418	47019.6	21	0	P29066;P29067	P29066	Beta-arrestin-1	Arrb1	Arrb1	Beta-arrestin-1
-0.442891	0.809617	1.92374	-0.807163	0.70227	-1.10629	-0.359907	-0.947369	0.228		16	16	11	NaN	NaN	NaN	NaN	0	NaN	35315000000	433	422	47209.6	22	0	P29101	P29101	Synaptotagmin-2	Syt2	Syt2	Synaptotagmin-2
0.0711707	0.370744	0.409174	-1.23912	-1.81505	-0.528053	0.688052	0.919399	1.12369		8	8	8	NaN	NaN	NaN	NaN	0	NaN	4306100000	161	343	38201.8	18	0	P29147	P29147	D-beta-hydroxybutyrate dehydrogenase, mitochondrial	Bdh1	Bdh1	D-beta-hydroxybutyrate dehydrogenase, mitochondrial
-0.831455	0.655191	1.37909	-1.14254	0.698074	0.82579	0.101271	-0.110486	-1.57493		9	9	9	NaN	NaN	NaN	NaN	0	NaN	7923800000	143	335	35302.7	14	0	P29266	P29266	3-hydroxyisobutyrate dehydrogenase, mitochondrial	Hibadh	Hibadh	3-hydroxyisobutyrate dehydrogenase, mitochondrial
0.323566	-0.489785	0.61055	NaN	NaN	NaN	-1.7536	0.236052	1.07322		5	5	5	NaN	NaN	NaN	NaN	0	NaN	1301400000	8	194	22591.4	11	0	P29314	P29314	40S ribosomal protein S9	Rps9	Rps9	40S ribosomal protein S9
0.0214232	0.338234	-0.947129	1.69404	0.472341	1.14593	-0.653927	-0.964235	-1.10667		17	17	17	NaN	NaN	NaN	NaN	0	NaN	9668100000	243	456	49974.5	24	0	P29315	P29315	Ribonuclease inhibitor	Rnh1	Rnh1	Ribonuclease inhibitor
0.3371	0.500177	1.63178	-0.276863	-1.88925	-0.604784	-0.458424	-0.100818	0.86108		4	4	4	NaN	NaN	NaN	NaN	0	NaN	737250000	25	227	25438.3	16	0	P29411	P29411	GTP:AMP phosphotransferase AK3, mitochondrial	Ak3	Ak3	GTP:AMP phosphotransferase AK3, mitochondrial
-1.87322	-0.0176229	1.24937	-0.852601	0.490949	-0.791636	0.203467	0.678111	0.913193		3	3	3	NaN	NaN	NaN	NaN	0	NaN	10623000000	141	71	8254.65	3	0	P29419	P29419	ATP synthase subunit e, mitochondrial	Atp5i	Atp5i	ATP synthase subunit e, mitochondrial
-0.647284	-1.34124	-1.12901	-0.151772	1.40272	-0.0187658	-0.294567	1.2537	0.926215		11	11	11	NaN	NaN	NaN	NaN	0	NaN	1863300000	70	417	46517.5	23	0	P29457	P29457	Serpin H1	Serpinh1	Serpinh1	Serpin H1
0.0527693	-0.227215	-0.70891	1.68552	-1.31152	1.13912	0.703205	-0.9839	-0.349064		10	10	10	NaN	NaN	NaN	NaN	0	NaN	16374000000	388	309	29794.5	14	0	P30009	P30009	Myristoylated alanine-rich C-kinase substrate	Marcks	Marcks	Myristoylated alanine-rich C-kinase substrate
0.304912	-0.193967	-0.314322	-0.106788	2.33777	0.158588	-1.21372	-0.0844312	-0.888045		17	17	17	NaN	NaN	NaN	NaN	0	NaN	8058800000	227	610	69176	37	0	P30349	P30349	Leukotriene A-4 hydrolase	Lta4h	Lta4h	Leukotriene A-4 hydrolase
1.05463	-0.227508	0.224866	2.02285	-0.492115	-0.0639463	-0.466913	-1.2751	-0.77676		140	140	140	NaN	NaN	NaN	NaN	0	NaN	82370000000	2026	4687	533540	293	0	P30427	P30427	Plectin	Plec	Plec	Plectin
0.906446	1.09871	1.57432	-0.904035	-1.195	-0.962546	-0.408783	-0.326462	0.217345		7	7	7	34	34	34	NaN	0	NaN	3303900000	73	244	27439	13	0	P30713	P30713	Glutathione S-transferase theta-2	Gstt2	Gstt2	Glutathione S-transferase theta-2
1.20866	0.258147	-0.469926	0.161142	1.63234	-0.266059	-1.75661	-0.149307	-0.618388		18	14	14	NaN	NaN	NaN	NaN	0	NaN	10397000000	190	780	85338.8	32	0	P30835	P30835	ATP-dependent 6-phosphofructokinase, liver type	Pfkl	Pfkl	ATP-dependent 6-phosphofructokinase, liver type
1.00044	0.350542	0.655637	0.069337	-1.58147	-1.60613	0.399253	-0.332178	1.04457		12	12	12	NaN	NaN	NaN	NaN	0	NaN	14113000000	250	484	54081.6	21	0	P30839;P11883	P30839	Fatty aldehyde dehydrogenase	Aldh3a2	Aldh3a2	Fatty aldehyde dehydrogenase
-0.269476	-0.859314	-0.695295	1.80085	0.814635	1.05952	-0.524988	-0.152276	-1.17365		2	2	2	NaN	NaN	NaN	NaN	0	NaN	11538000000	134	115	12477.2	6	0	P30904	P30904	Macrophage migration inhibitory factor	Mif	Mif	Macrophage migration inhibitory factor
-1.28667	-0.43918	NaN	0.0867372	NaN	0.157482	1.99567	-0.304328	-0.209706		3	3	3	NaN	NaN	NaN	NaN	0	NaN	292780000	17	345	37167.3	17	0	P30919	P30919	N(4)-(Beta-N-acetylglucosaminyl)-L-asparaginase;Glycosylasparaginase alpha chain;Glycosylasparaginase beta chain	Aga	Aga	N(4)-(Beta-N-acetylglucosaminyl)-L-asparaginase
-0.275876	-0.767504	-1.04615	2.34092	-0.377187	0.675447	-0.00572142	-0.188131	-0.35579		34	30	26	NaN	NaN	NaN	NaN	0	NaN	46456000000	704	466	53732.7	34	0	P31000	P31000	Vimentin	Vim	Vim	Vimentin
0.512959	0.626948	0.748532	-1.4467	-1.35162	-0.606468	-0.525649	0.761492	1.28051		12	11	11	NaN	NaN	NaN	NaN	0	NaN	2209100000	95	724	80465.3	34	0	P31016	P31016	Disks large homolog 4	Dlg4	Dlg4	Disks large homolog 4
-0.909604	0.283548	-0.506525	1.81599	0.054956	1.05972	-0.54879	0.190915	-1.44021		15	15	15	NaN	NaN	NaN	NaN	0	NaN	27335000000	324	187	20801.4	10	0	P31044	P31044	Phosphatidylethanolamine-binding protein 1;Hippocampal cholinergic neurostimulating peptide	Pebp1	Pebp1	Phosphatidylethanolamine-binding protein 1
NaN	NaN	NaN	-0.741289	1.17417	1.09801	-0.750833	0.316434	-1.09649		4	4	4	NaN	NaN	NaN	NaN	0	NaN	1011700000	23	396	44671	19	0	P31211	P31211	Corticosteroid-binding globulin	Serpina6	Serpina6	Corticosteroid-binding globulin
0.805551	-0.761602	0.791751	1.63514	NaN	-0.00430315	-1.36424	-0.580949	-0.52135		5	5	5	NaN	NaN	NaN	NaN	0	NaN	1031000000	30	201	22602.9	16	0	P31232	P31232	Transgelin	Tagln	Tagln	Transgelin
-0.775045	-0.702213	-1.12873	0.759063	0.723143	1.64818	-0.160099	0.746444	-1.11074		10	10	10	NaN	NaN	NaN	NaN	0	NaN	18758000000	252	161	18763.4	11	0	P31399	P31399	ATP synthase subunit d, mitochondrial	Atp5h	Atp5h	ATP synthase subunit d, mitochondrial
1.31428	-0.00356493	-0.131085	-1.29361	-1.71486	0.349293	1.21409	0.0618591	0.203593		15	15	15	NaN	NaN	NaN	NaN	0	NaN	98909000000	501	573	62106.3	23	0	P31596	P31596	Excitatory amino acid transporter 2	Slc1a2	Slc1a2	Excitatory amino acid transporter 2
0.804482	-1.54219	-0.0458585	1.60375	-0.913982	0.901723	-0.678268	-0.441289	0.311631		8	8	8	NaN	NaN	NaN	NaN	0	NaN	26719000000	161	627	69947	16	0	P31647;P31646;P48056;P23977;P31643;P28570	P31647	Sodium- and chloride-dependent GABA transporter 3	Slc6a11	Slc6a11	Sodium- and chloride-dependent GABA transporter 3
-1.18151	-0.684147	NaN	0.0277626	NaN	0.446575	1.39132	NaN	NaN		2	2	2	NaN	NaN	NaN	NaN	0	NaN	301340000	20	630	70171.8	15	0	P31652	P31652	Sodium-dependent serotonin transporter	Slc6a4	Slc6a4	Sodium-dependent serotonin transporter
0.658475	-1.05967	0.449744	NaN	0.276716	0.880505	-1.54973	-0.809999	1.15396		4	4	4	NaN	NaN	NaN	NaN	0	NaN	373580000	31	727	81055.4	32	0	P31662	P31662	Sodium-dependent neutral amino acid transporter SLC6A17	Slc6a17	Slc6a17	Sodium-dependent neutral amino acid transporter SLC6A17
0.301246	NaN	-1.5211	NaN	NaN	NaN	1.21394	-0.243862	0.249779		7	3	3	NaN	NaN	NaN	NaN	NaN	NaN	367730000	9	586	69390.8	32	0	P31977	P31977	Ezrin	Ezr	Ezr	Ezrin
-0.270025	-0.193511	0.356366	-1.90591	NaN	0.146225	-0.472096	1.44384	0.89511		5	5	5	NaN	NaN	NaN	NaN	0	NaN	3494300000	29	311	33835.4	18	0	P32089	P32089	Tricarboxylate transport protein, mitochondrial	Slc25a1	Slc25a1	Tricarboxylate transport protein, mitochondrial
-0.00426385	0.67539	0.992937	-1.96393	-1.07939	-0.32637	0.0582538	0.637927	1.00944		10	10	10	NaN	NaN	NaN	NaN	0	NaN	1726300000	73	773	88125.4	36	0	P32198	P32198	Carnitine O-palmitoyltransferase 1, liver isoform	Cpt1a	Cpt1a	Carnitine O-palmitoyltransferase 1, liver isoform
1.1295	1.54123	0.0924331	0.969372	-1.20991	-1.13247	-0.382689	-0.491455	-0.516008		11	11	11	NaN	NaN	NaN	NaN	0	NaN	3154000000	98	561	61454.6	24	0	P32232	P32232	Cystathionine beta-synthase	Cbs	Cbs	Cystathionine beta-synthase
-1.18971	0.445971	1.70534	NaN	NaN	NaN	-0.593985	-0.35284	-0.0147744		4	4	4	NaN	NaN	NaN	NaN	0	NaN	317360000	24	364	40452.7	14	0	P32362	P32362	Uroporphyrinogen decarboxylase	Urod	Urod	Uroporphyrinogen decarboxylase
0.308344	0.570288	1.03704	-1.2601	0.498429	-1.81107	-0.675071	0.516061	0.816074		14	14	14	NaN	NaN	NaN	NaN	0	NaN	46590000000	590	452	48396.2	19	0	P32551	P32551	Cytochrome b-c1 complex subunit 2, mitochondrial	Uqcrc2	Uqcrc2	Cytochrome b-c1 complex subunit 2, mitochondrial
-0.0455055	0.315163	1.34837	-1.9599	0.0239864	-1.14412	0.145532	0.803114	0.513356		8	8	7	NaN	NaN	NaN	NaN	0	NaN	873450000	38	450	50746.3	28	0	P32577	P32577	Tyrosine-protein kinase CSK	Csk	Csk	Tyrosine-protein kinase CSK
-0.115353	-0.556473	-0.785756	1.39284	-0.411668	1.97282	-0.0439217	-0.752253	-0.700231		6	6	6	20	20	20	NaN	0	NaN	2483600000	71	345	38067.6	18	0	P32736	P32736	Opioid-binding protein/cell adhesion molecule	Opcml	Opcml	Opioid-binding protein/cell adhesion molecule
0.997472	-0.791808	-0.427136	0.457525	-0.508642	0.743789	1.67126	-1.27884	-0.863614		5	5	5	NaN	NaN	NaN	NaN	0	NaN	665700000	26	288	33067.5	13	0	P32851	P32851	Syntaxin-1A	Stx1a	Stx1a	Syntaxin-1A
0.219764	0.651944	1.01455	-1.83077	-0.660072	-1.11715	0.0155348	0.797715	0.908482		33	33	33	NaN	NaN	NaN	NaN	0	NaN	28571000000	632	697	78180.3	40	0	P33124	P33124	Long-chain-fatty-acid--CoA ligase 6	Acsl6	Acsl6	Long-chain-fatty-acid--CoA ligase 6
0.916453	0.582426	-2.40982	0.868627	-0.380178	0.294886	0.0201212	0.157417	-0.0499361		38	38	27	NaN	NaN	NaN	NaN	0	NaN	223230000000	2270	724	83281.2	33	0	P34058	P34058	Heat shock protein HSP 90-beta	Hsp90ab1	Hsp90ab1	Heat shock protein HSP 90-beta
-0.22217	-0.868531	-0.670436	1.19375	-0.538594	1.98727	0.388691	-0.884931	-0.385047		7	7	7	NaN	NaN	NaN	NaN	0	NaN	6261300000	92	241	26390.9	11	0	P34064	P34064	Proteasome subunit alpha type-5	Psma5	Psma5	Proteasome subunit alpha type-5
0.89345	0.625269	0.767965	-1.78751	0.169313	-1.548	-0.158042	0.381593	0.655956		3	3	3	NaN	NaN	NaN	NaN	0	NaN	1156200000	41	263	29197.3	12	0	P34067	P34067	Proteasome subunit beta type-4	Psmb4	Psmb4	Proteasome subunit beta type-4
1.09937	0.570844	-0.784293	-0.271458	-0.743934	-1.24733	1.88151	-0.252765	-0.251941		71	71	69	NaN	NaN	40	NaN	0	NaN	69943000000	1116	2774	299531	119	0	P34926	P34926	Microtubule-associated protein 1A;MAP1A heavy chain;MAP1 light chain LC2	Map1a	Map1a	Microtubule-associated protein 1A
0.37983	0.460464	0.920575	0.583035	-0.486257	1.34801	-0.268773	-1.56299	-1.37389		11	6	6	NaN	NaN	NaN	NaN	0	NaN	17051000000	281	246	28054.4	14	0	P35213	P35213	14-3-3 protein beta/alpha;14-3-3 protein beta/alpha, N-terminally processed	Ywhab	Ywhab	14-3-3 protein beta/alpha
1.1981	0.8935	0.937973	-0.543273	-1.69816	-1.23679	-0.113207	0.220846	0.341013		6	5	3	NaN	NaN	NaN	NaN	0	NaN	1721900000	53	207	23668.2	13	0	P35280	P35280	Ras-related protein Rab-8A	Rab8a	Rab8a	Ras-related protein Rab-8A
1.57821	-1.10101	0.770733	-0.556639	-1.39642	-0.682254	0.0820042	0.408781	0.89659		8	7	7	34	NaN	NaN	NaN	0	NaN	6112900000	140	200	22858.4	13	0	P35281;P35289	P35281	Ras-related protein Rab-10	Rab10	Rab10	Ras-related protein Rab-10
-0.92765	-0.30787	-0.279597	1.77755	-0.949598	1.55873	-0.127939	-0.673941	-0.0696938		4	3	3	NaN	NaN	NaN	NaN	0	NaN	474870000	13	191	22245.4	12	0	P35332	P35332	Hippocalcin-like protein 4	Hpcal4	Hpcal4	Hippocalcin-like protein 4
-0.885884	-0.695713	0.681799	NaN	NaN	-0.983799	0.345622	-0.230099	1.76807		4	4	4	NaN	NaN	NaN	NaN	NaN	NaN	456970000	19	203	23476.2	9	0	P35427	P35427	60S ribosomal protein L13a	Rpl13a	Rpl13a	60S ribosomal protein L13a
0.513874	0.730346	1.36586	-0.384699	-1.33341	-1.20615	-0.956304	0.292746	0.977737		8	8	8	NaN	NaN	NaN	NaN	0	NaN	26180000000	300	273	30190.7	11	0	P35435	P35435	ATP synthase subunit gamma, mitochondrial	Atp5c1	Atp5c1	ATP synthase subunit gamma, mitochondrial
0.863176	0.456344	-1.04731	1.59445	-0.225005	0.588581	0.135384	-0.87128	-1.49434		15	12	10	NaN	NaN	NaN	NaN	0	NaN	7184800000	178	544	60577.8	27	0	P35465	P35465	Serine/threonine-protein kinase PAK 1	Pak1	Pak1	Serine/threonine-protein kinase PAK 1
-0.407948	-0.841084	-0.866498	0.332067	1.75824	-0.798648	-0.784548	1.36404	0.244388		2	2	2	NaN	NaN	NaN	NaN	0	NaN	2072500000	17	94	10559.8	3	0	P35467	P35467	Protein S100-A1	S100a1	S100a1	Protein S100-A1
0.312071	0.568102	-0.543937	-0.910373	2.09011	-0.423366	-1.30866	0.400849	-0.184797		15	15	15	NaN	NaN	NaN	NaN	0	NaN	2626700000	86	1019	117710	50	0	P35559	P35559	Insulin-degrading enzyme	Ide	Ide	Insulin-degrading enzyme
-0.662648	-0.701694	-0.799775	2.06633	-0.214671	1.17038	-0.531168	0.288172	-0.614921		16	16	16	NaN	NaN	NaN	NaN	0	NaN	38605000000	719	591	67254.8	32	0	P35565	P35565	Calnexin	Canx	Canx	Calnexin
-0.0262083	0.427692	0.357254	-2.12797	0.3746	-0.85773	-0.058662	0.478522	1.4325		22	22	22	NaN	NaN	NaN	NaN	0	NaN	10376000000	268	727	80972.8	43	0	P35571	P35571	Glycerol-3-phosphate dehydrogenase, mitochondrial	Gpd2	Gpd2	Glycerol-3-phosphate dehydrogenase, mitochondrial
-0.303316	-0.342194	-1.83395	1.00748	1.5525	0.810277	-0.103659	-0.281362	-0.505778		8	8	8	53	53	53	NaN	0	NaN	118610000000	505	198	21783.7	13	0	P35704	P35704	Peroxiredoxin-2	Prdx2	Prdx2	Peroxiredoxin-2
-1.11533	-0.0132861	0.727081	-0.979118	NaN	-0.936786	-0.247624	1.42378	1.14128		6	6	6	NaN	NaN	NaN	NaN	NaN	NaN	633220000	12	390	42823.3	16	0	P35738	P35738	2-oxoisovalerate dehydrogenase subunit beta, mitochondrial	Bckdhb	Bckdhb	2-oxoisovalerate dehydrogenase subunit beta, mitochondrial
0.283506	1.86271	0.787697	0.245899	-1.37252	0.189628	-0.122823	-1.13454	-0.739555		3	3	3	33	33	33	NaN	0	NaN	1073900000	20	97	10863.3	7	0	P35745	P35745	Acylphosphatase-2	Acyp2	Acyp2	Acylphosphatase-2
0.0956419	-0.401978	-0.083382	1.79153	-1.05264	1.4934	-0.346769	-0.881113	-0.614681		6	5	5	NaN	NaN	NaN	NaN	0	NaN	1316600000	61	390	42889.1	21	0	P35815	P35815	Protein phosphatase 1B	Ppm1b	Ppm1b	Protein phosphatase 1B
NaN	0.0300551	NaN	-1.1158	-1.18312	1.04485	-0.559247	1.31579	0.467485		2	2	2	NaN	NaN	NaN	NaN	NaN	NaN	153410000	8	879	96622	42	0	P35952	P35952	Low-density lipoprotein receptor	Ldlr	Ldlr	Low-density lipoprotein receptor
-0.899457	0.164443	NaN	1.35124	NaN	0.726421	0.763022	-1.1279	-0.977772		2	2	2	NaN	NaN	NaN	NaN	0	NaN	370290000	21	208	22696	10	0	P36201	P36201	Cysteine-rich protein 2	Crip2	Crip2	Cysteine-rich protein 2
-0.0538403	-0.764294	-0.429389	NaN	NaN	NaN	-0.115877	1.96344	-0.600042		7	4	4	20	NaN	NaN	NaN	0	NaN	241580000	5	400	44281.8	20	0	P36506	P36506	Dual specificity mitogen-activated protein kinase kinase 2	Map2k2	Map2k2	Dual specificity mitogen-activated protein kinase kinase 2
0.0388092	0.231539	-0.48949	-2.16827	1.18267	-0.450972	0.80216	-0.0170954	0.870648		5	3	3	NaN	NaN	NaN	NaN	0	NaN	1485200000	29	206	23317.5	9	0	P36860	P36860	Ras-related protein Ral-B	Ralb	Ralb	Ras-related protein Ral-B
1.42212	0.708707	1.01778	-0.994248	-0.39455	-0.995866	-1.30251	0.749866	-0.211306		17	17	8	45	45	NaN	NaN	0	NaN	5510100000	108	447	51678.1	24	0	P36876;P36877;P97888	P36876	Serine/threonine-protein phosphatase 2A 55 kDa regulatory subunit B alpha isoform	Ppp2r2a	Ppp2r2a	Serine/threonine-protein phosphatase 2A 55 kDa regulatory subunit B alpha isoform
-1.16709	-1.16396	-1.05389	0.0638798	1.48741	0.967082	-0.0972869	1.00477	-0.040926		16	16	16	NaN	NaN	NaN	NaN	0	NaN	10512000000	154	608	69335.3	38	0	P36953;CON__REFSEQ:XP_585019	P36953	Afamin	Afm	Afm	Afamin
0.691019	0.598715	0.756042	-0.305089	1.3735	-1.72527	-1.2551	0.0944202	-0.228241		6	6	6	NaN	NaN	NaN	NaN	0	NaN	6303300000	115	225	25629.7	12.5	0	P36970;Q91XR8	P36970;Q91XR8	Phospholipid hydroperoxide glutathione peroxidase, mitochondrial;Phospholipid hydroperoxide glutathione peroxidase, nuclear	Gpx4	Gpx4	Phospholipid hydroperoxide glutathione peroxidase, mitochondrial;Phospholipid hydroperoxide glutathione peroxidase, nuclear
0.312875	0.28753	0.67963	-0.140651	1.53533	0.0592055	-2.07987	-0.794599	0.140551		5	5	5	NaN	NaN	NaN	NaN	0	NaN	3192300000	56	180	19545.8	12	0	P36972	P36972	Adenine phosphoribosyltransferase	Aprt	Aprt	Adenine phosphoribosyltransferase
-0.714921	0.617008	1.4531	-1.78897	0.551931	-0.830786	-0.359397	0.315078	0.75696		6	6	6	NaN	NaN	NaN	NaN	0	NaN	998190000	59	614	68196.5	25	0	P37136	P37136	Acetylcholinesterase	Ache	Ache	Acetylcholinesterase
NaN	NaN	NaN	NaN	NaN	NaN	NaN	0.707107	-0.707107		3	3	3	NaN	NaN	NaN	155	NaN	NaN	97409000	4	1390	155003	58	0	P37199	P37199	Nuclear pore complex protein Nup155	Nup155	Nup155	Nuclear pore complex protein Nup155
0.670465	-0.175159	-0.876939	1.68075	-0.95344	0.898642	0.643908	-0.866886	-1.02134		17	17	12	37	37	28	NaN	0	NaN	9251000000	320	560	63745	35	0	P37285;Q68G30	P37285	Kinesin light chain 1	Klc1	Klc1	Kinesin light chain 1
-1.18026	-0.759416	-0.554178	1.86282	NaN	-0.752622	0.633952	0.417822	0.331881		2	2	2	NaN	NaN	NaN	NaN	0	NaN	548130000	15	140	14515.3	6	0	P37377	P37377	Alpha-synuclein	Snca	Snca	Alpha-synuclein
0.319478	-0.384101	-1.78576	0.890146	NaN	NaN	1.2852	-0.34216	0.0172		4	4	4	NaN	NaN	NaN	NaN	0	NaN	1283000000	25	330	36434.7	15	0	P37397	P37397	Calponin-3	Cnn3	Cnn3	Calponin-3
-0.41952	-0.571454	0.0550121	2.12483	-0.775872	0.97151	-0.126857	-0.0690129	-1.18864		10	10	9	NaN	NaN	NaN	NaN	0	NaN	3103000000	213	199	22500.7	14	0	P37805	P37805	Transgelin-3	Tagln3	Tagln3	Transgelin-3
0.213152	0.748018	0.873975	1.58785	0.182978	-0.265618	-0.889277	-0.900564	-1.55051		9	9	9	NaN	NaN	NaN	NaN	0	NaN	3171700000	123	182	20456.5	11	0	P37996	P37996	ADP-ribosylation factor-like protein 3	Arl3	Arl3	ADP-ribosylation factor-like protein 3
0.521449	1.52115	-1.72902	-0.447323	NaN	0.598424	0.3806	-0.849486	0.00420548		7	7	7	NaN	NaN	NaN	NaN	0	NaN	1527600000	44	478	53051.9	24	0	P38062	P38062	Methionine aminopeptidase 2	Metap2	Metap2	Methionine aminopeptidase 2
0.145286	0.497746	0.809889	-1.91587	0.473134	-1.41888	-0.111151	0.748749	0.771101		171	171	171	NaN	NaN	NaN	NaN	0	NaN	185610000000	3375	4644	532252	259	0	P38650	P38650	Cytoplasmic dynein 1 heavy chain 1	Dync1h1	Dync1h1	Cytoplasmic dynein 1 heavy chain 1
1.43242	1.29481	0.86522	-0.157692	-0.94578	-0.545685	-1.48028	-0.292641	-0.170374		19	19	19	NaN	NaN	NaN	NaN	0	NaN	16510000000	396	562	61403.1	33	0	P38652	P38652	Phosphoglucomutase-1	Pgm1	Pgm1	Phosphoglucomutase-1
NaN	-0.109231	-0.9409	NaN	NaN	NaN	NaN	NaN	1.05013		2	2	2	NaN	NaN	NaN	NaN	0	NaN	107890000	8	415	47777.4	22	0	P38656	P38656	Lupus La protein homolog	Ssb	Ssb	Lupus La protein homolog
-0.531541	-0.270689	-1.40557	-1.06127	1.25223	0.0387587	0.446671	1.66029	-0.128881		15	15	15	28	28	28	NaN	0	NaN	7796400000	140	643	72720.2	34	0	P38659	P38659	Protein disulfide-isomerase A4	Pdia4	Pdia4	Protein disulfide-isomerase A4
0.0867537	0.417086	0.821603	-0.593548	-2.19743	-0.532507	0.18742	0.953278	0.857347		5	5	5	NaN	NaN	NaN	NaN	0	NaN	5294900000	112	127	14257.9	8	0	P38718	P38718	Mitochondrial pyruvate carrier 2	Mpc2	Mpc2	Mitochondrial pyruvate carrier 2
NaN	NaN	NaN	NaN	0.707107	NaN	NaN	-0.707107	NaN		2	2	2	NaN	NaN	NaN	NaN	0	NaN	66096000	9	327	36747.1	14	0	P38918	P38918	Aflatoxin B1 aldehyde reductase member 3	Akr7a3	Akr7a3	Aflatoxin B1 aldehyde reductase member 3
-0.0733116	-0.257045	-0.0715391	-0.237807	-1.63911	-1.12265	1.27593	0.934491	1.19105		12	12	12	NaN	NaN	NaN	NaN	0	NaN	13173000000	227	295	32824.1	13	0	P38983	P38983	40S ribosomal protein SA	Rpsa	Rpsa	40S ribosomal protein SA
0.324699	0.196229	0.0721286	-1.08481	1.40352	-1.65889	-0.814182	0.968439	0.59287		27	15	15	NaN	NaN	NaN	NaN	0	NaN	9448300000	119	870	98230.4	48	0	P39052	P39052	Dynamin-2	Dnm2	Dnm2	Dynamin-2
0.427384	0.0344663	-0.42836	1.23562	-1.13766	1.75299	-0.172622	-0.506828	-1.20499		7	7	7	NaN	NaN	NaN	NaN	0	NaN	9503800000	131	194	21583.8	11	0	P39069	P39069	Adenylate kinase isoenzyme 1	Ak1	Ak1	Adenylate kinase isoenzyme 1
0.0500512	-0.517959	-1.09294	0.567651	-0.966426	1.21384	1.80073	-0.582162	-0.472786		3	2	2	NaN	NaN	NaN	NaN	NaN	NaN	2756200000	30	297	34134.6	19	0	P39951	P39951	Cyclin-dependent kinase 1	Cdk1	Cdk1	Cyclin-dependent kinase 1
-0.185172	1.70261	0.822263	-1.47109	-0.418314	-1.1041	-0.135416	-0.10681	0.896024		8	8	8	NaN	NaN	NaN	NaN	0	NaN	2356100000	80	205	22964.9	9	0	P40112	P40112	Proteasome subunit beta type-3	Psmb3	Psmb3	Proteasome subunit beta type-3
0.833248	-0.883677	NaN	1.54708	NaN	-0.0833897	-0.455903	NaN	-0.957363		3	3	3	NaN	NaN	NaN	NaN	NaN	NaN	200610000	13	918	102450	44	0	P40190	P40190	Interleukin-6 receptor subunit beta	Il6st	Il6st	Interleukin-6 receptor subunit beta
0.673335	-0.431213	0.344019	0.911944	-1.83137	0.0926483	0.947274	-1.3283	0.621666		8	8	8	NaN	NaN	NaN	NaN	0	NaN	36591000000	306	226	25214.9	6	0	P40241	P40241	CD9 antigen	Cd9	Cd9	CD9 antigen
-0.129134	-0.489105	-0.281116	-1.67693	1.8918	-0.657836	0.145712	0.826528	0.37008		7	7	7	NaN	NaN	NaN	NaN	0	NaN	3374700000	94	201	22912.4	10	0	P40307	P40307	Proteasome subunit beta type-2	Psmb2	Psmb2	Proteasome subunit beta type-2
0.697615	1.17294	1.18366	-1.13579	-0.314937	-1.59484	-0.734261	0.336556	0.389064		19	19	19	35	35	35	NaN	0	NaN	4349400000	151	660	75810.4	38	0	P40329	P40329	Arginine--tRNA ligase, cytoplasmic	Rars	Rars	Arginine--tRNA ligase, cytoplasmic
NaN	-0.707107	NaN	NaN	NaN	NaN	0.707107	NaN	NaN		2	2	2	NaN	NaN	NaN	NaN	0	NaN	133140000	8	588	63313	25	0	P40748	P40748	Synaptotagmin-3	Syt3	Syt3	Synaptotagmin-3
-1.15042	0.0671079	1.21101	NaN	NaN	NaN	-1.15254	0.0929139	0.931932		2	2	2	10	10	10	NaN	0	NaN	514000000	25	211	24309.5	9	0	P41123	P41123	60S ribosomal protein L13	Rpl13	Rpl13	60S ribosomal protein L13
-0.581944	-0.507591	-0.748387	1.83972	0.584628	1.31137	-0.915545	-0.68727	-0.294977		2	2	2	NaN	NaN	NaN	NaN	0	NaN	1561000000	39	178	20552.6	11	0	P41350	P41350	Caveolin-1	Cav1	Cav1	Caveolin-1
0.252892	-0.401564	-2.20878	0.928009	1.28822	0.557021	-0.0768728	-0.139937	-0.198992		4	4	4	NaN	NaN	NaN	NaN	0	NaN	1896700000	67	158	18151.6	9	0	P41498	P41498	Low molecular weight phosphotyrosine protein phosphatase	Acp1	Acp1	Low molecular weight phosphotyrosine protein phosphatase
1.0281	1.24051	0.899733	-0.616728	0.706276	-1.33041	-1.18083	-0.00430235	-0.742347		18	18	18	NaN	NaN	NaN	NaN	0	NaN	8184200000	279	597	68458.3	38	0	P41499	P41499	Tyrosine-protein phosphatase non-receptor type 11	Ptpn11	Ptpn11	Tyrosine-protein phosphatase non-receptor type 11
1.21373	-0.168945	-0.0778418	1.23297	-1.36475	-1.04749	-1.08206	0.604328	0.690065		20	20	20	NaN	NaN	NaN	NaN	0	NaN	6407900000	197	959	107162	44	0	P41542	P41542	General vesicular transport factor p115	Uso1	Uso1	General vesicular transport factor p115
0.615468	1.33036	0.702537	-1.46443	-0.246979	-1.4717	-0.412597	0.902248	0.0451007		14	13	13	NaN	NaN	NaN	NaN	0	NaN	10087000000	282	414	46734.4	24	0	P41562	P41562	Isocitrate dehydrogenase [NADP] cytoplasmic	Idh1	Idh1	Isocitrate dehydrogenase [NADP] cytoplasmic
-0.172854	0.639708	1.26797	-1.38247	0.593954	-1.41517	-0.879318	0.721225	0.626955		10	10	10	NaN	NaN	NaN	NaN	0	NaN	11682000000	183	393	42851.4	17	0	P41565	P41565	Isocitrate dehydrogenase [NAD] subunit gamma 1, mitochondrial	Idh3g	Idh3g	Isocitrate dehydrogenase [NAD] subunit gamma 1, mitochondrial
0.910042	1.48348	0.858363	0.677963	-0.884506	-1.07201	-1.24624	-0.476891	-0.250196		13	13	13	NaN	NaN	NaN	NaN	0	NaN	185120000000	738	334	36612.4	17	0	P42123	P42123	L-lactate dehydrogenase B chain	Ldhb	Ldhb	L-lactate dehydrogenase B chain
NaN	-1.21205	0.0216726	NaN	NaN	NaN	1.4518	-0.57148	0.310058		9	9	9	NaN	NaN	NaN	NaN	0	NaN	1194100000	10	2549	288794	131	0	P42346	P42346	Serine/threonine-protein kinase mTOR	Mtor	Mtor	Serine/threonine-protein kinase mTOR
1.07756	1.17886	1.22866	-0.957529	-0.252885	-1.57604	-0.584334	-0.308997	0.194694		11	11	11	NaN	NaN	NaN	NaN	0	NaN	2693700000	88	704	80253.9	37	0	P42676	P42676	Neurolysin, mitochondrial	Nln	Nln	Neurolysin, mitochondrial
-0.773663	-0.350619	-1.01823	0.765855	-1.0878	-0.438192	1.90881	0.763781	0.230063		9	9	9	NaN	NaN	NaN	NaN	0	NaN	7368300000	195	206	22892.7	13	0	P42930	P42930	Heat shock protein beta-1	Hspb1	Hspb1	Heat shock protein beta-1
-0.141059	-0.140135	1.858	-0.838063	-0.526355	-0.872881	-0.966731	1.31783	0.309389		6	6	6	NaN	NaN	NaN	NaN	0	NaN	506780000	21	317	35538.5	14	0	P43138	P43138	DNA-(apurinic or apyrimidinic site) lyase;DNA-(apurinic or apyrimidinic site) lyase, mitochondrial	Apex1	Apex1	DNA-(apurinic or apyrimidinic site) lyase
0.266166	0.410682	1.26683	-0.899782	-1.37737	-1.49408	0.468104	0.488099	0.871354		14	14	14	NaN	NaN	NaN	NaN	0	NaN	5798400000	131	845	94447	37	0	P43244	P43244	Matrin-3	Matr3	Matr3	Matrin-3
0.704232	0.0478721	-0.803404	0.854091	NaN	1.18569	0.0863446	-1.92089	-0.15393		3	3	3	NaN	NaN	NaN	NaN	0	NaN	1489400000	14	1277	141387	62	0	P43245	P43245	Multidrug resistance protein 1	Abcb1	Abcb1	Multidrug resistance protein 1
0.727502	0.0124244	0.262193	-0.733981	1.76154	0.9203	-0.902753	-1.05979	-0.987432		6	6	6	NaN	NaN	NaN	NaN	0	NaN	5276000000	105	306	34455	15	0	P45479	P45479	Palmitoyl-protein thioesterase 1	Ppt1	Ppt1	Palmitoyl-protein thioesterase 1
0.953035	0.262405	1.45333	0.867627	-1.19996	-1.15756	-0.128284	0.110995	-1.16158		13	13	13	NaN	NaN	NaN	NaN	0	NaN	55132000000	795	166	18532.5	10	0	P45592	P45592	Cofilin-1	Cfl1	Cfl1	Cofilin-1
1.8904	1.09958	0.488259	-0.600978	-1.07188	-0.752037	-0.612806	-0.684321	0.243792		22	22	22	NaN	NaN	NaN	NaN	0	NaN	6614000000	162	655	70749.3	41	0	P45953	P45953	Very long-chain specific acyl-CoA dehydrogenase, mitochondrial	Acadvl	Acadvl	Very long-chain specific acyl-CoA dehydrogenase, mitochondrial
0.949828	-0.964395	-0.0589048	1.16694	0.163196	1.40878	-0.80918	-1.3829	-0.47337		16	16	14	NaN	NaN	NaN	NaN	0	NaN	9624100000	335	859	97301.9	42	0	P46101	P46101	Dipeptidyl aminopeptidase-like protein 6	Dpp6	Dpp6	Dipeptidyl aminopeptidase-like protein 6
1.03006	1.36767	0.625903	-1.01896	0.33	-0.94985	0.0888407	-1.6125	0.138839		10	10	10	NaN	NaN	NaN	NaN	0	NaN	2159000000	94	474	52344.6	25	0	P46413	P46413	Glutathione synthetase	Gss	Gss	Glutathione synthetase
-1.03867	-0.142051	-0.683734	-1.41312	1.7506	-0.146559	0.862606	0.032901	0.778028		45	45	45	NaN	NaN	NaN	NaN	0	NaN	94890000000	1246	806	89348.8	45	0	P46462	P46462	Transitional endoplasmic reticulum ATPase	Vcp	Vcp	Transitional endoplasmic reticulum ATPase
0.568016	0.46756	0.308487	-0.724076	1.64775	0.238832	-1.9698	-0.414982	-0.121786		11	11	11	NaN	NaN	NaN	NaN	0	NaN	5240900000	116	295	33565.6	17	0	P46844	P46844	Biliverdin reductase A	Blvra	Blvra	Biliverdin reductase A
-1.15194	-0.428513	-0.493607	NaN	NaN	NaN	NaN	1.25484	0.819226		5	5	2	NaN	NaN	NaN	NaN	0	NaN	754520000	14	480	55735.4	29	0	P47196	P47196	RAC-alpha serine/threonine-protein kinase	Akt1	Akt1	RAC-alpha serine/threonine-protein kinase
-0.112555	NaN	NaN	NaN	NaN	1.3909	NaN	-0.295908	-0.982434		2	2	2	NaN	NaN	NaN	NaN	0	NaN	1459900000	8	128	14788.9	4	0	P47198	P47198	60S ribosomal protein L22	Rpl22	Rpl22	60S ribosomal protein L22
0.80572	NaN	-0.544908	NaN	NaN	-1.13536	NaN	NaN	0.874552		2	2	2	NaN	NaN	NaN	NaN	NaN	NaN	100790000	6	1161	132976	58	0	P47245	P47245	Nardilysin	Nrd1	Nrdc	Nardilysin
0.551804	0.8082	0.617089	-0.206721	-1.46431	-1.81035	0.031838	0.499423	0.973028		11	11	11	NaN	NaN	NaN	NaN	0	NaN	3892700000	111	684	75832.4	37	0	P47709	P47709	Rabphilin-3A	Rph3a	Rph3a	Rabphilin-3A
0.276234	0.231341	-0.22801	1.54047	-1.63197	1.34111	-0.670758	-0.716321	-0.142103		15	15	15	NaN	NaN	NaN	NaN	0	NaN	17908000000	313	277	30578.1	17	0	P47727	P47727	Carbonyl reductase [NADPH] 1	Cbr1	Cbr1	Carbonyl reductase [NADPH] 1
-1.02753	-0.411298	0.00628556	1.852	-1.26149	0.976164	-0.0489225	0.58779	-0.673005		14	14	13	NaN	NaN	NaN	NaN	0	NaN	12909000000	322	271	31404.7	18	0	P47728	P47728	Calretinin	Calb2	Calb2	Calretinin
-0.0169466	-0.430642	-1.69331	1.57269	-0.310049	1.13152	0.650779	-0.0880278	-0.816016		41	41	39	NaN	NaN	NaN	NaN	0	NaN	696200000000	3156	430	49957.1	31	0	P47819	P47819	Glial fibrillary acidic protein	Gfap	Gfap	Glial fibrillary acidic protein
NaN	-1.26798	NaN	NaN	NaN	0.37236	NaN	-0.20507	1.10069		8	8	8	29	29	29	NaN	0	NaN	417450000	17	369	41706.3	17	0	P47853	P47853	Biglycan	Bgn	Bgn	Biglycan
1.21449	1.13247	1.3248	-0.0311538	-1.17322	-0.800264	-1.13523	-0.406289	-0.125595		22	21	19	NaN	34	NaN	NaN	0	NaN	58802000000	793	780	85559.9	32	0	P47858	P47858	ATP-dependent 6-phosphofructokinase, muscle type	Pfkm	Pfkm	ATP-dependent 6-phosphofructokinase, muscle type
1.4917	1.08041	1.2529	-0.623282	-1.14767	-0.819903	-0.729048	-0.23187	-0.273234		32	32	30	NaN	NaN	NaN	NaN	0	NaN	77426000000	1106	788	85720.3	35	0	P47860	P47860	ATP-dependent 6-phosphofructokinase, platelet type	Pfkp	Pfkp	ATP-dependent 6-phosphofructokinase, platelet type
0.269883	0.256484	-0.372611	1.41711	-1.41002	-0.191589	1.35911	-1.35701	0.0286415		8	8	8	NaN	NaN	NaN	NaN	0	NaN	50618000000	343	323	34480.1	8	0	P47863	P47863	Aquaporin-4	Aqp4	Aqp4	Aquaporin-4
-0.281775	-0.635947	-0.617849	1.39348	NaN	1.73003	-0.10862	-0.523245	-0.956071		4	4	4	NaN	NaN	NaN	NaN	0	NaN	839020000	16	471	53183.1	26	0	P47868	P47868	Secretogranin-3	Scg3	Scg3	Secretogranin-3
1.02273	0.588014	0.739882	1.01342	-1.76463	0.280548	-0.394851	-1.28223	-0.202882		7	7	7	NaN	NaN	NaN	NaN	0	NaN	9597000000	180	193	20613.5	12	0	P47875	P47875	Cysteine and glycine-rich protein 1	Csrp1	Csrp1	Cysteine and glycine-rich protein 1
0.386799	0.425171	-2.58593	-0.0327853	0.814801	0.37093	0.161661	0.385171	0.0741857		31	31	27	NaN	NaN	NaN	NaN	0	NaN	571190000000	2853	572	62277.6	31	0	P47942	P47942	Dihydropyrimidinase-related protein 2	Dpysl2	Dpysl2	Dihydropyrimidinase-related protein 2
NaN	NaN	NaN	-1.01145	1.6102	0.268682	-0.842042	0.536254	-0.561642		5	5	3	NaN	NaN	NaN	NaN	0	NaN	3269300000	70	145	16196.4	9	0	P47967	P47967	Galectin-5	Lgals5	Lgals5	Galectin-5
0.356603	-0.280308	-0.691517	-0.764827	2.46374	0.0255588	-0.165312	-0.165715	-0.778225		5	5	5	12	12	12	NaN	0	NaN	705870000	28	432	47216.4	22	0	P47971	P47971	Neuronal pentraxin-1	Nptx1	Nptx1	Neuronal pentraxin-1
0.765041	-2.14984	0.320715	1.06067	-0.518416	-0.668393	0.762959	-0.0831181	0.510383		2	2	2	NaN	NaN	NaN	NaN	0	NaN	1938600000	48	182	19833.5	5	0	P47987	P47987	Plasmolipin	Pllp	Pllp	Plasmolipin
0.257519	-0.356891	-1.16513	-1.23654	2.12312	0.307999	-0.434903	0.233496	0.27133		9	9	9	NaN	NaN	NaN	NaN	0	NaN	11184000000	212	254	28326.4	14	0	P48004	P48004	Proteasome subunit alpha type-7	Psma7	Psma7	Proteasome subunit alpha type-7
0.892267	0.638347	1.34159	0.436335	0.608398	-1.59753	-0.532828	-0.938205	-0.848373		36	36	36	NaN	NaN	NaN	NaN	0	NaN	102060000000	1404	673	75754.2	44	0	P48037	P48037	Annexin A6	Anxa6	Anxa6	Annexin A6
-0.924312	-0.863921	-1.26505	-0.373047	1.72924	0.929234	-0.207734	0.866603	0.108984		4	4	4	NaN	NaN	NaN	NaN	0	NaN	11953000000	109	230	25468	8	0	P48199	P48199	C-reactive protein	Crp	Crp	C-reactive protein
0.647914	0.582622	0.35486	NaN	NaN	NaN	NaN	-1.75657	0.171172		3	3	3	NaN	NaN	NaN	NaN	0	NaN	1234700000	16	383	42745.7	16	0	P48303	P48303	Sphingosine 1-phosphate receptor 1	S1pr1	S1pr1	Sphingosine 1-phosphate receptor 1
-0.0368385	0.145581	-0.0359098	-1.23409	-0.649185	-1.52176	1.0165	1.13062	1.18509		23	23	23	NaN	NaN	NaN	NaN	0	NaN	8384400000	205	733	83300.5	38	0	P48450	P48450	Lanosterol synthase	Lss	Lss	Lanosterol synthase
0.330202	0.0626014	-0.631616	1.76042	-0.731119	1.34948	-0.566742	-0.299437	-1.27379		15	15	15	NaN	NaN	NaN	NaN	0	NaN	71423000000	651	249	26848.9	17	0	P48500	P48500	Triosephosphate isomerase	Tpi1	Tpi1	Triosephosphate isomerase
0.533208	-0.498914	-0.57678	0.736244	1.93814	0.177242	-0.977222	0.0276767	-1.3596		6	6	6	NaN	NaN	NaN	NaN	0	NaN	3031500000	69	274	30547.9	11	0	P48508	P48508	Glutamate--cysteine ligase regulatory subunit	Gclm	Gclm	Glutamate--cysteine ligase regulatory subunit
-0.0760125	-0.540554	-0.132639	1.90344	-1.77997	0.911462	-0.072289	-0.23765	0.024208		19	19	19	28	28	28	NaN	0	NaN	6000000000	195	665	74323.7	43	0	P48679	P48679	Prelamin-A/C;Lamin-A/C	Lmna	Lmna	Prelamin-A/C
0.271892	-0.251026	-0.577228	1.88639	-1.37906	1.12021	0.14684	-0.448741	-0.76928		22	22	22	NaN	NaN	NaN	NaN	0	NaN	37368000000	711	679	73857.7	37	0	P48721	P48721	Stress-70 protein, mitochondrial	Hspa9	Hspa9	Stress-70 protein, mitochondrial
-0.0197687	-0.564802	1.44096	-0.306653	NaN	1.54631	-1.26335	-0.713326	-0.119363		2	2	2	3	3	3	NaN	0	NaN	191100000	14	921	100523	33	0	P48768	P48768	Sodium/calcium exchanger 2	Slc8a2	Slc8a2	Sodium/calcium exchanger 2
2.37323	0.0682279	-0.363948	-0.22136	NaN	-0.222259	-0.143435	-0.723539	-0.766919		2	2	2	NaN	NaN	NaN	NaN	NaN	NaN	1064200000	12	425	47085.9	13	0	P48974	P48974	Vasopressin V1b receptor	Avpr1b	Avpr1b	Vasopressin V1b receptor
0.693372	0.895369	1.39377	-0.773587	-0.451799	-1.36107	-1.27112	0.683775	0.191282		6	6	6	NaN	NaN	NaN	NaN	0	NaN	909300000	27	561	64246.6	29	0	P49088	P49088	Asparagine synthetase [glutamine-hydrolyzing]	Asns	Asns	Asparagine synthetase [glutamine-hydrolyzing]
-0.080974	-1.12008	-1.15253	2.07121	0.215687	0.845164	0.0542697	-0.487527	-0.345221		10	10	10	NaN	NaN	NaN	NaN	0	NaN	5101700000	193	799	88494.6	36	0	P49134	P49134	Integrin beta-1	Itgb1	Itgb1	Integrin beta-1
0.127632	-0.695938	1.78354	-1.13863	NaN	-0.839785	NaN	0.494361	0.268818		7	4	4	NaN	NaN	NaN	NaN	0	NaN	416540000	14	423	48016.9	20	0	P49186;Q9WTY9	P49186	Mitogen-activated protein kinase 9	Mapk9	Mapk9	Mitogen-activated protein kinase 9
0.936001	1.13466	1.40269	-0.614231	-0.149856	-1.55332	-1.0233	-0.0517523	-0.0808875		12	12	7	NaN	NaN	NaN	NaN	0	NaN	3537600000	85	464	52530.3	21	0	P49187	P49187	Mitogen-activated protein kinase 10	Mapk10	Mapk10	Mitogen-activated protein kinase 10
-0.614939	-0.00821608	0.912269	-1.71034	0.656455	-1.357	0.472493	0.75906	0.890217		6	6	6	NaN	NaN	NaN	NaN	0	NaN	2520300000	51	264	29944.9	17	0	P49242	P49242	40S ribosomal protein S3a;40S ribosomal protein S3b	Rps3a	Rps3a	40S ribosomal protein S3a
-0.183164	0.72977	1.06707	-1.89736	0.729644	-1.12778	-0.421898	0.779788	0.32394		16	16	16	NaN	NaN	NaN	NaN	0	NaN	59117000000	781	359	38982.1	21	0	P49432	P49432	Pyruvate dehydrogenase E1 component subunit beta, mitochondrial	Pdhb	Pdhb	Pyruvate dehydrogenase E1 component subunit beta, mitochondrial
0.497228	0.113535	0.86447	-0.636722	-2.36844	0.0395511	0.21576	0.879371	0.395249		4	4	4	15	15	15	NaN	0	NaN	6379900000	90	379	42480.1	12	0	P49655	P49655	ATP-sensitive inward rectifier potassium channel 10	Kcnj10	Kcnj10	ATP-sensitive inward rectifier potassium channel 10
0.690749	0.374625	1.31214	-0.5165	-0.538598	-0.58676	-1.83873	-0.0690956	1.17216		7	7	7	NaN	NaN	NaN	NaN	0	NaN	748160000	30	477	55691.2	22	0	P49803;P49801	P49803	Regulator of G-protein signaling 7	Rgs7	Rgs7	Regulator of G-protein signaling 7
-0.770215	-0.820919	-0.724079	NaN	NaN	NaN	0.575236	1.6958	0.044181		2	2	2	NaN	NaN	NaN	NaN	0	NaN	1330100000	12	1809	201278	89	0	P49816	P49816	Tuberin	Tsc2	Tsc2	Tuberin
NaN	-1.74192	NaN	-0.676051	1.20552	0.524532	-0.153135	0.869476	-0.0284198		2	2	2	NaN	NaN	NaN	NaN	0	NaN	7199100000	73	89	10238.5	7	0	P50115	P50115	Protein S100-A8	S100a8	S100a8	Protein S100-A8
NaN	NaN	-1.54494	NaN	0.661276	0.63695	-0.590734	1.15034	-0.312893		4	4	4	NaN	NaN	NaN	NaN	0	NaN	2582100000	35	113	13144.9	8	0	P50116	P50116	Protein S100-A9	S100a9	S100a9	Protein S100-A9
0.313802	-0.978507	-0.28679	1.44452	NaN	1.26458	0.260246	-1.19918	-0.818675		7	7	7	NaN	NaN	NaN	NaN	0	NaN	362750000	11	945	107995	52	0	P50123	P50123	Glutamyl aminopeptidase	Enpep	Enpep	Glutamyl aminopeptidase
1.70615	1.26194	-0.128534	-0.148778	0.0549201	-1.55541	0.0639609	-0.277204	-0.977056		21	21	21	NaN	NaN	NaN	NaN	0	NaN	90328000000	899	623	67643.6	26	0	P50137	P50137	Transketolase	Tkt	Tkt	Transketolase
0.555408	0.781163	-2.45602	0.17998	0.76348	-0.233067	-0.328315	0.366433	0.370938		34	26	26	NaN	NaN	NaN	NaN	0	NaN	126180000000	1142	447	50536.6	25	0	P50398	P50398	Rab GDP dissociation inhibitor alpha	Gdi1	Gdi1	Rab GDP dissociation inhibitor alpha
1.00213	0.662414	0.470071	-1.49466	1.21925	-0.945709	-1.1424	0.555906	-0.326998		35	35	27	NaN	NaN	NaN	NaN	0	NaN	136320000000	1237	445	50537.1	28	0	P50399	P50399	Rab GDP dissociation inhibitor beta	Gdi2	Gdi2	Rab GDP dissociation inhibitor beta
0.62065	-1.06828	-1.16341	1.52147	-1.01118	0.167184	1.28145	-0.0125039	-0.335379		4	4	4	NaN	NaN	NaN	NaN	0	NaN	2987100000	28	119	13370.3	8	0	P50408	P50408	V-type proton ATPase subunit F	Atp6v1f	Atp6v1f	V-type proton ATPase subunit F
-0.066861	1.0104	-0.219283	-1.43947	NaN	-0.592855	-0.890863	1.48137	0.71756		5	5	5	NaN	NaN	NaN	NaN	0	NaN	1425900000	42	528	58959	25	0	P50430	P50430	Arylsulfatase B	Arsb	Arsb	Arylsulfatase B
-0.317218	0.837613	0.0654119	-1.17076	-0.566098	-1.62056	0.783032	1.37228	0.616305		10	10	10	NaN	NaN	NaN	NaN	0	NaN	1846500000	54	423	48242.1	25	0	P50442	P50442	Glycine amidinotransferase, mitochondrial	Gatm	Gatm	Glycine amidinotransferase, mitochondrial
1.04204	1.52379	1.00079	-0.803458	-1.0764	-0.768227	-1.03536	0.300788	-0.183963		26	26	26	40	40	40	NaN	0	NaN	22669000000	550	968	106790	49	0	P50475	P50475	Alanine--tRNA ligase, cytoplasmic	Aars	Aars	Alanine--tRNA ligase, cytoplasmic
0.0145187	-0.656349	-0.449019	1.79356	-0.645645	1.6217	-0.233314	-0.674376	-0.77107		7	7	7	NaN	NaN	NaN	NaN	0	NaN	11705000000	153	368	41279.5	12	0	P50503	P50503	Hsc70-interacting protein	St13	St13	Hsc70-interacting protein
0.456221	0.893978	1.30047	-0.979929	-0.307723	-1.09774	-1.50674	0.603759	0.637698		25	25	25	NaN	NaN	NaN	NaN	0	NaN	53266000000	857	500	56455.8	30	0	P50554	P50554	4-aminobutyrate aminotransferase, mitochondrial;4-aminobutyrate aminotransferase, brain isoform;4-aminobutyrate aminotransferase, liver isoform	Abat	Abat	4-aminobutyrate aminotransferase, mitochondrial
-0.261616	NaN	-1.29423	0.273981	1.59852	0.84509	-1.342	-0.127606	0.307863		3	3	3	8	8	8	NaN	0	NaN	408350000	17	376	43218.9	15	0	P50609	P50609	Fibromodulin	Fmod	Fmod	Fibromodulin
-0.300451	0.111214	1.20622	NaN	NaN	-1.82181	-0.380015	0.220236	0.964607		7	7	7	NaN	NaN	NaN	NaN	0	NaN	1221600000	36	421	47256.8	16	0	P50878	P50878	60S ribosomal protein L4	Rpl4	Rpl4	60S ribosomal protein L4
0.773523	0.639447	2.13314	-0.645375	-0.293871	-0.732475	-0.802272	-0.23216	-0.839962		6	6	6	NaN	NaN	NaN	NaN	0	NaN	772590000	32	1038	115440	51	0	P50904	P50904	Ras GTPase-activating protein 1	Rasa1	Rasa1	Ras GTPase-activating protein 1
-0.785598	0.244113	2.16113	-0.461197	-1.24068	-0.48562	-0.132342	-0.0983929	0.798588		6	6	6	NaN	NaN	NaN	NaN	0	NaN	804290000	17	3110	343762	144	0	P51111	P51111	Huntingtin	Htt	Htt	Huntingtin
0.667381	0.503841	0.666631	-1.92826	0.908921	-1.39088	-0.0505285	0.0107003	0.612202		10	10	8	NaN	NaN	NaN	NaN	0	NaN	2373000000	66	213	23628.8	14	0	P51146	P51146	Ras-related protein Rab-4B	Rab4b	Rab4b	Ras-related protein Rab-4B
-0.0899083	0.678895	0.676168	-1.81801	-0.337889	-1.10942	-0.178293	0.991693	1.18677		13	13	13	NaN	NaN	NaN	NaN	0	NaN	5420500000	136	425	47096.2	19	0	P51583	P51583	Multifunctional protein ADE2;Phosphoribosylaminoimidazole-succinocarboxamide synthase;Phosphoribosylaminoimidazole carboxylase	Paics	Paics	Multifunctional protein ADE2
-0.0048045	1.09115	0.555738	-1.73984	-0.899392	-0.885722	0.00756622	0.691026	1.18428		8	8	8	NaN	NaN	NaN	NaN	0	NaN	1862800000	43	430	49604.9	24	0	P51607	P51607	N-acylglucosamine 2-epimerase	Renbp	Renbp	N-acylglucosamine 2-epimerase
0.760122	1.55704	1.3965	-0.925313	-0.243262	-0.795883	-1.13706	-0.402388	-0.20976		13	13	13	NaN	NaN	NaN	NaN	0	NaN	21612000000	328	325	36505.9	23	0	P51635	P51635	Alcohol dehydrogenase [NADP(+)]	Akr1a1	Akr1a1	Alcohol dehydrogenase [NADP(+)]
0.628132	1.02703	0.278089	1.61362	-1.28874	-1.21186	-0.795087	-0.321022	0.0698362		15	15	15	NaN	NaN	NaN	NaN	0	NaN	4320800000	153	501	54458.7	24	0	P51647;P13601	P51647	Retinal dehydrogenase 1	Aldh1a1	Aldh1a1	Retinal dehydrogenase 1
0.542443	0.760594	1.10444	-1.21298	0.979447	-0.420548	-1.81585	0.0499285	0.0125225		12	12	12	NaN	NaN	NaN	NaN	0	NaN	18435000000	270	523	56131.4	28	0	P51650	P51650	Succinate-semialdehyde dehydrogenase, mitochondrial	Aldh5a1	Aldh5a1	Succinate-semialdehyde dehydrogenase, mitochondrial
-0.916146	NaN	NaN	1.06486	-0.082798	-0.0371131	-1.0737	-0.554534	1.59943		6	6	6	NaN	NaN	NaN	NaN	0	NaN	639200000	15	338	38279	16	0	P51886;CON__Q05443	P51886	Lumican	Lum	Lum	Lumican
NaN	NaN	NaN	NaN	NaN	NaN	0.823949	-1.11257	0.288619		3	3	3	NaN	NaN	NaN	NaN	0	NaN	249000000	17	573	64024.2	29	0	P52020	P52020	Squalene monooxygenase	Sqle	Sqle	Squalene monooxygenase
-0.356093	-1.57976	0.431833	-0.535774	NaN	0.223455	-0.0228114	-0.120224	1.95937		2	2	2	NaN	NaN	NaN	NaN	0	NaN	848320000	18	419	47936	18	0	P52191	P52191	Inward rectifier potassium channel 16	Kcnj16	Kcnj16	Inward rectifier potassium channel 16
-0.308486	-0.203378	0.453182	-1.10594	1.32747	-1.53829	-0.495064	1.33022	0.540283		21	21	21	NaN	NaN	NaN	NaN	0	NaN	15229000000	356	875	97124.2	40	0	P52296	P52296	Importin subunit beta-1	Kpnb1	Kpnb1	Importin subunit beta-1
0.566848	0.421071	0.947639	-1.37381	1.47054	-1.42515	-0.445127	0.313455	-0.475469		28	13	13	NaN	NaN	NaN	NaN	0	NaN	7025500000	216	949	104589	47	0	P52303	P52303	AP-1 complex subunit beta-1	Ap1b1	Ap1b1	AP-1 complex subunit beta-1
1.37786	1.26287	0.386052	-0.847637	0.128002	-1.84783	-0.386935	0.131062	-0.203436		9	9	9	NaN	NaN	NaN	NaN	0	NaN	1582100000	71	477	52912.3	29	0	P52481	P52481	Adenylyl cyclase-associated protein 2	Cap2	Cap2	Adenylyl cyclase-associated protein 2
-0.0752508	-1.04218	-0.790645	1.81405	-1.23491	0.905843	0.539954	0.358919	-0.475784		8	8	8	NaN	NaN	NaN	NaN	0	NaN	1777200000	110	260	28574.8	11	0	P52555	P52555	Endoplasmic reticulum resident protein 29	Erp29	Erp29	Endoplasmic reticulum resident protein 29
1.42722	0.917942	-0.0765146	-1.63571	-0.310244	-0.939525	-0.660224	0.315466	0.961584		15	15	15	NaN	NaN	NaN	NaN	0	NaN	3112200000	82	770	88039.7	39	0	P52631	P52631	Signal transducer and activator of transcription 3	Stat3	Stat3	Signal transducer and activator of transcription 3
-1.00727	0.16779	NaN	NaN	1.35171	NaN	-0.962853	0.450624	NaN		4	4	4	NaN	NaN	NaN	NaN	NaN	NaN	300830000	7	789.5	90528.3	40.5	0	P52632;Q62771	P52632;Q62771	Signal transducer and activator of transcription 5B;Signal transducer and activator of transcription 5A	Stat5b;Stat5a	Stat5b;Stat5a	Signal transducer and activator of transcription 5B;Signal transducer and activator of transcription 5A
0.767415	0.793553	0.0758608	0.569375	-0.838071	1.62029	-0.696138	-1.22295	-1.06933		5	5	5	NaN	NaN	NaN	NaN	0	NaN	1744300000	36	137	14303.5	8	0	P52759	P52759	Ribonuclease UK114	Hrsp12	Hrsp12	Ribonuclease UK114
0.756336	1.0274	1.21782	-0.84206	-1.46219	-1.03101	-0.666661	0.368858	0.631494		32	32	32	NaN	NaN	NaN	NaN	0	NaN	29603000000	649	1178	129777	57	0	P52873	P52873	Pyruvate carboxylase, mitochondrial	Pc	Pc	Pyruvate carboxylase, mitochondrial
1.59077	0.583927	0.83484	0.217911	0.262107	-1.0514	-1.32631	0.0893263	-1.20117		17	17	17	NaN	NaN	NaN	NaN	0	NaN	8610100000	266	499	56916.7	28	0	P53042	P53042	Serine/threonine-protein phosphatase 5	Ppp5c	Ppp5c	Serine/threonine-protein phosphatase 5
1.16214	1.08998	-1.58243	-0.235538	-1.43703	-0.164874	-0.0961997	0.659578	0.60438		34	34	28	NaN	NaN	NaN	NaN	0	NaN	193790000000	1622	838	96174.3	48	0	P53534	P53534	Glycogen phosphorylase, brain form	Pygb	Pygb	Glycogen phosphorylase, brain form
-0.450453	-0.474735	0.108376	0.980751	NaN	-0.172249	1.82096	-1.45844	-0.354211		3	3	3	12	12	12	NaN	0	NaN	521470000	16	233	26158.1	10	0	P53563	P53563	Bcl-2-like protein 1	Bcl2l1	Bcl2l1	Bcl-2-like protein 1
-1.47389	-0.804988	0.885273	NaN	NaN	NaN	-0.170606	0.514288	1.04992		6	6	6	NaN	NaN	NaN	NaN	0	NaN	412910000	13	647	72594	34	0	P53669	P53669	LIM domain kinase 1	Limk1	Limk1	LIM domain kinase 1
0.271619	-0.340456	1.41271	-0.0210285	NaN	-1.71693	-0.9658	0.746502	0.613387		6	6	4	NaN	NaN	NaN	NaN	0	NaN	1161100000	36	418	46981.2	22	0	P53676	P53676	AP-3 complex subunit mu-1	Ap3m1	Ap3m1	AP-3 complex subunit mu-1
0.624575	-0.174003	1.20611	-1.75299	0.815634	NaN	-0.612617	NaN	-0.106707		6	5	5	NaN	NaN	NaN	NaN	0	NaN	1038600000	17	271	31450	19	0	P53812	P53812	Phosphatidylinositol transfer protein beta isoform	Pitpnb	Pitpnb	Phosphatidylinositol transfer protein beta isoform
0.508249	0.0501092	-0.0889775	-0.29922	2.31818	-0.796758	-0.992235	0.0997055	-0.799051		7	7	7	NaN	NaN	NaN	NaN	0	NaN	1350900000	28	675	74626.9	31	0	P53813	P53813	Vitamin K-dependent protein S	Pros1	Pros1	Vitamin K-dependent protein S
0.547513	-1.40217	-0.128113	-0.0052384	1.49271	-1.34457	-0.307757	-0.107531	1.25515		2	2	2	NaN	NaN	NaN	NaN	0	NaN	1515600000	36	494	53238.2	15	0	P53987	P53987	Monocarboxylate transporter 1	Slc16a1	Slc16a1	Monocarboxylate transporter 1
0.385532	-0.690984	-0.672277	1.85776	-0.265849	1.30217	-0.073865	-0.949033	-0.893448		24	24	22	NaN	NaN	NaN	NaN	0	NaN	7141200000	191	1091	123823	54	0	P54290	P54290	Voltage-dependent calcium channel subunit alpha-2/delta-1;Voltage-dependent calcium channel subunit alpha-2-1;Voltage-dependent calcium channel subunit delta-1	Cacna2d1	Cacna2d1	Voltage-dependent calcium channel subunit alpha-2/delta-1
-0.216761	0.233288	0.650612	-1.26481	2.14466	-0.254707	-1.05227	0.0737166	-0.313726		14	10	9	NaN	NaN	NaN	NaN	0	NaN	26177000000	361	340	37377	13	0	P54311	P54311	Guanine nucleotide-binding protein G(I)/G(S)/G(T) subunit beta-1	Gnb1	Gnb1	Guanine nucleotide-binding protein G(I)/G(S)/G(T) subunit beta-1
-0.252471	0.764173	0.343708	-2.25229	0.673726	-0.680373	-0.100346	0.97957	0.524306		14	14	7	NaN	NaN	NaN	NaN	0	NaN	55717000000	638	340	37331	13	0	P54313	P54313	Guanine nucleotide-binding protein G(I)/G(S)/G(T) subunit beta-2	Gnb2	Gnb2	Guanine nucleotide-binding protein G(I)/G(S)/G(T) subunit beta-2
0.813411	0.343973	0.270233	-1.11171	-2.11342	0.748615	-0.225065	0.532011	0.741946		20	20	20	NaN	NaN	NaN	NaN	0	NaN	4514800000	161	795	87083.9	46	0	P54319	P54319	Phospholipase A-2-activating protein	Plaa	Plaa	Phospholipase A-2-activating protein
0.466166	0.339725	1.05513	-1.40225	-0.666671	-1.44391	-0.298959	0.793468	1.15731		9	9	9	NaN	NaN	NaN	NaN	0	NaN	1580600000	56	559	63973.2	28	0	P54645;Q09137	P54645	5-AMP-activated protein kinase catalytic subunit alpha-1	Prkaa1	Prkaa1	5'-AMP-activated protein kinase catalytic subunit alpha-1
-0.0943422	0.778352	1.47361	-0.746565	-1.00705	-0.789915	-1.27245	0.938859	0.719496		10	10	10	NaN	NaN	NaN	NaN	0	NaN	18804000000	307	411	46045.8	18	0	P54690	P54690	Branched-chain-amino-acid aminotransferase, cytosolic	Bcat1	Bcat1	Branched-chain-amino-acid aminotransferase, cytosolic
0.196946	-0.162795	-1.13191	NaN	NaN	1.71106	0.579348	-1.17896	-0.0136844		2	2	2	NaN	NaN	NaN	NaN	NaN	NaN	346670000	14	215	24144.6	11	0	P54900	P54900	Sodium channel subunit beta-2	Scn2b	Scn2b	Sodium channel subunit beta-2
0.80582	0.372765	-0.265079	-1.22478	1.74833	-1.54241	0.39377	-0.21144	-0.0769749		20	20	18	NaN	NaN	NaN	NaN	0	NaN	26757000000	740	295	33192.7	18	0	P54921	P54921	Alpha-soluble NSF attachment protein	Napa	Napa	Alpha-soluble NSF attachment protein
-0.0216196	-0.569104	-0.743272	2.2553	-0.978106	0.820016	-0.439707	0.122879	-0.446386		4	4	4	NaN	NaN	NaN	NaN	0	NaN	13813000000	169	132	14864	7	0	P55051	P55051	Fatty acid-binding protein, brain	Fabp7	Fabp7	Fatty acid-binding protein, brain
0.402701	-0.320431	-1.30062	1.83889	-0.188458	1.07824	-0.01634	-0.330081	-1.16391		8	8	8	63	63	63	NaN	0	NaN	16216000000	199	135	15059.4	7	0	P55053	P55053	Fatty acid-binding protein, epidermal	Fabp5	Fabp5	Fatty acid-binding protein, epidermal
-0.957129	-0.781612	-1.15284	0.756515	NaN	1.84588	-0.134537	0.0437998	0.379928		13	13	13	14	14	14	NaN	0	NaN	4355000000	92	1257	135545	41	0	P55067	P55067	Neurocan core protein;150 kDa adult core glycoprotein	Ncan	Ncan	Neurocan core protein
0.596021	0.541096	0.580024	1.10985	-2.19196	0.177932	-0.628802	-0.609326	0.425168		20	20	20	NaN	NaN	NaN	NaN	0	NaN	16004000000	378	883	96057.3	40	0	P55068	P55068	Brevican core protein	Bcan	Bcan	Brevican core protein
NaN	NaN	NaN	NaN	1.62011	-0.234837	0.0896592	-0.402528	-1.0724		4	4	4	NaN	NaN	NaN	NaN	0	NaN	663600000	26	355	39358	13	0	P55159	P55159	Serum paraoxonase/arylesterase 1	Pon1	Pon1	Serum paraoxonase/arylesterase 1
0.697447	0.443802	0.605317	-1.49255	0.0166909	-1.78855	-0.177002	1.01433	0.680519		17	17	17	NaN	NaN	NaN	NaN	0	NaN	3572200000	125	1128	128865	61	0	P55161	P55161	Nck-associated protein 1	Nckap1	Nckap1	Nck-associated protein 1
-0.275659	-0.4542	-0.671461	1.00916	2.28853	-0.299285	-0.36542	-0.737237	-0.494431		12	12	12	NaN	NaN	NaN	NaN	0	NaN	6695000000	160	319	35848.7	21	0	P55260	P55260	Annexin A4	Anxa4	Anxa4	Annexin A4
NaN	NaN	NaN	NaN	0.707107	NaN	NaN	-0.707107	NaN		4	4	4	10	10	10	NaN	0	NaN	213770000	6	589	66666.6	30	0	P55314	P55314	Complement component C8 beta chain	C8b	C8b	Complement component C8 beta chain
NaN	-0.525218	NaN	NaN	NaN	NaN	1.15318	NaN	-0.627958		7	7	7	NaN	NaN	NaN	NaN	0	NaN	905780000	7	494	54362.5	30	0	P56522	P56522	NADPH:adrenodoxin oxidoreductase, mitochondrial	Fdxr	Fdxr	NADPH:adrenodoxin oxidoreductase, mitochondrial
-0.157097	0.240878	0.867161	1.20842	-0.328796	0.151937	1.02003	-1.38773	-1.6148		10	4	4	NaN	NaN	NaN	NaN	0	NaN	2559300000	92	239	27165	16	0	P56536	P56536	Kinesin heavy chain isoform 5C	Kif5c	Kif5c	Kinesin heavy chain isoform 5C
1.43983	1.08388	0.834681	-1.43834	0.486185	-0.917703	-0.392461	-0.824883	-0.271189		16	16	16	NaN	NaN	NaN	NaN	0	NaN	3370700000	100	1036	115606	49	0	P56558	P56558	UDP-N-acetylglucosamine--peptide N-acetylglucosaminyltransferase 110 kDa subunit	Ogt	Ogt	UDP-N-acetylglucosamine--peptide N-acetylglucosaminyltransferase 110 kDa subunit
0.223496	0.00876218	0.579551	-0.00285211	0.335279	2.03102	-0.959777	-1.13319	-1.08229		7	7	7	50	50	50	NaN	0	NaN	15381000000	236	266	28172.5	13	0	P56571	P56571	ES1 protein homolog, mitochondrial			ES1 protein homolog, mitochondrial
0.0311984	0.675593	1.8968	-0.967443	0.44078	-1.07493	-1.27205	0.0878196	0.182231		19	19	18	NaN	NaN	NaN	NaN	0	NaN	18378000000	324	452	50967.3	24	0	P56574	P56574	Isocitrate dehydrogenase [NADP], mitochondrial	Idh2	Idh2	Isocitrate dehydrogenase [NADP], mitochondrial
1.28507	0.542969	-1.05371	-1.23444	-0.338177	-1.12005	1.38001	0.242201	0.296126		6	6	6	NaN	NaN	NaN	NaN	0	NaN	2348400000	71	338	37998.6	16	0	P56603	P56603	Secretory carrier-associated membrane protein 1	Scamp1	Scamp1	Secretory carrier-associated membrane protein 1
-0.57826	1.7827	0.686293	NaN	-0.0272537	NaN	-0.496752	-0.0371796	-1.32955		12	3	3	NaN	NaN	NaN	NaN	0	NaN	435180000	6	453	51982.5	21	0	P56932	P56932	Serine/threonine-protein phosphatase 2A 55 kDa regulatory subunit B delta isoform	Ppp2r2d	Ppp2r2d	Serine/threonine-protein phosphatase 2A 55 kDa regulatory subunit B delta isoform
1.04832	1.65007	0.762886	-0.617094	-1.34959	0.023325	-1.00981	-0.60388	0.095789		7	7	7	NaN	NaN	NaN	NaN	0	NaN	3358000000	103	216	23960.8	13	0	P57113	P57113	Maleylacetoacetate isomerase	Gstz1	Gstz1	Maleylacetoacetate isomerase
0.592334	0.343232	0.273744	0.0753642	-2.21416	0.230519	1.12121	-0.969015	0.546768		12	12	12	NaN	NaN	NaN	NaN	0	NaN	14057000000	250	799	87842.4	26	0	P58295	P58295	Sodium- and chloride-dependent glycine transporter 2	Slc6a5	Slc6a5	Sodium- and chloride-dependent glycine transporter 2
NaN	NaN	NaN	NaN	NaN	NaN	NaN	-0.707107	0.707107		4	4	4	NaN	NaN	NaN	NaN	NaN	NaN	267930000	9	794	87111.4	29	0	P58405	P58405	Striatin-3	Strn3	Strn3	Striatin-3
0.53402	0.494307	0.596055	-0.967813	-1.36674	-1.46514	1.15321	0.116298	0.905813		12	10	10	NaN	41	41	NaN	0	NaN	62319000000	555	354	40068.5	17	0	P59215	P59215	Guanine nucleotide-binding protein G(o) subunit alpha	Gnao1	Gnao1	Guanine nucleotide-binding protein G(o) subunit alpha
-0.469227	-0.0904686	1.40575	-0.787799	-0.703738	-1.63926	0.356891	0.90563	1.02222		9	9	9	NaN	NaN	NaN	NaN	0	NaN	1634400000	81	456	50214	22	0	P60123	P60123	RuvB-like 1	Ruvbl1	Ruvbl1	RuvB-like 1
0.976364	-0.425022	-1.07929	-0.214859	1.39441	-0.0305592	1.29791	-1.26276	-0.656196		12	12	12	NaN	NaN	NaN	NaN	0	NaN	921830000000	3233	277	30077.2	10	0	P60203	P60203	Myelin proteolipid protein	Plp1	Plp1	Myelin proteolipid protein
0.206958	-0.529338	-0.830176	0.617999	1.11339	1.52091	-1.72708	-0.206442	-0.166221		5	5	5	41	41	41	NaN	0	NaN	2615100000	64	117	13666.8	8	0	P60522	P60522	Gamma-aminobutyric acid receptor-associated protein-like 2	Gabarapl2	Gabarapl2	Gamma-aminobutyric acid receptor-associated protein-like 2
0.115843	-0.554642	1.8552	NaN	-0.980157	NaN	0.0829814	-0.519225	NaN		23	1	1	NaN	NaN	NaN	NaN	0	NaN	12264000000	318	375	41736.7	20	0	P60711	P60711	Actin, cytoplasmic 1;Actin, cytoplasmic 1, N-terminally processed	Actb	Actb	Actin, cytoplasmic 1
-0.571171	-0.58693	-0.899537	1.47429	0.279896	0.694631	1.24591	-0.150185	-1.4869		13	13	13	68	68	68	NaN	0	NaN	16975000000	416	206	23315.1	13	0	P60881	P60881	Synaptosomal-associated protein 25	Snap25	Snap25	Synaptosomal-associated protein 25
-0.0795222	0.512003	0.960592	-1.53027	1.46527	-1.45268	-0.269331	0.0242941	0.369651		10	10	4	NaN	NaN	NaN	NaN	0	NaN	5113000000	105	318	34834.2	16	0	P60892	P60892	Ribose-phosphate pyrophosphokinase 1	Prps1	Prps1	Ribose-phosphate pyrophosphokinase 1
0.978793	0.283196	0.315702	-1.66182	0.0304333	-1.52124	-0.272122	0.871312	0.975753		7	7	7	37	37	37	NaN	0	NaN	5375600000	130	246	27399.5	17	0	P60901	P60901	Proteasome subunit alpha type-6	Psma6	Psma6	Proteasome subunit alpha type-6
0.180364	-0.777218	-0.926126	0.781806	-1.51393	1.71548	0.605131	0.348875	-0.414384		5	5	5	NaN	NaN	NaN	NaN	0	NaN	11526000000	193	198	22100.7	7	0	P60905	P60905	DnaJ homolog subfamily C member 5	Dnajc5	Dnajc5	DnaJ homolog subfamily C member 5
-0.25879	-0.644821	-0.566501	1.65482	NaN	1.53872	-0.320336	-0.661201	-0.741894		7	7	7	NaN	NaN	NaN	NaN	0	NaN	3633900000	120	195	22432.1	10	0	P61023	P61023	Calcineurin B homologous protein 1	Chp1	Chp1	Calcineurin B homologous protein 1
1.20007	0.636687	-1.14132	-1.65608	1.41327	-0.0896736	0.032675	-0.0870338	-0.308598		11	11	11	NaN	NaN	NaN	NaN	0	NaN	20012000000	271	215	23927	16	0	P61107	P61107	Ras-related protein Rab-14	Rab14	Rab14	Ras-related protein Rab-14
-0.16582	-0.216487	-0.172185	1.88192	NaN	0.540281	-1.33278	NaN	-0.534937		2	2	2	NaN	NaN	NaN	NaN	NaN	NaN	273210000	17	155	17417.6	8	0	P61149	P61149	Fibroblast growth factor 1	Fgf1	Fgf1	Fibroblast growth factor 1
0.76559	0.358204	1.021	0.526205	0.637347	-1.37143	-1.90519	-0.172268	0.140551		15	15	15	NaN	NaN	NaN	NaN	0	NaN	10259000000	274	443	51596.7	21	0	P61203	P61203	COP9 signalosome complex subunit 2	Cops2	Cops2	COP9 signalosome complex subunit 2
0.702154	0.86973	0.760042	-0.898459	0.956634	-1.79706	-1.05448	0.267471	0.193965		9	9	4	NaN	NaN	26	NaN	0	NaN	42969000000	607	181	20696.8	10	0	P84079;P61206;P84082	P84079;P61206;P84082	ADP-ribosylation factor 1;ADP-ribosylation factor 3;ADP-ribosylation factor 2	Arf1;Arf3;Arf2	Arf1;Arf3;Arf2	ADP-ribosylation factor 1;ADP-ribosylation factor 3;ADP-ribosylation factor 2
0.0914941	0.400236	1.44845	-1.81602	-0.688784	-0.883642	0.803847	0.726218	-0.0818032		3	3	3	NaN	NaN	NaN	NaN	0	NaN	711450000	23	181	20411.6	9	0	P61212	P61212	ADP-ribosylation factor-like protein 1	Arl1	Arl1	ADP-ribosylation factor-like protein 1
-0.543561	-0.272412	1.90172	-1.30086	-0.395805	-0.130995	1.38645	-0.416626	-0.227904		7	7	7	NaN	NaN	NaN	NaN	0	NaN	1737800000	86	183	20504.4	11	0	P61227	P61227	Ras-related protein Rap-2b	Rap2b	Rap2b	Ras-related protein Rap-2b
-0.0567322	-0.849906	-0.342759	2.01568	-0.191477	1.20978	-0.00937228	-0.79275	-0.982461		10	10	10	NaN	NaN	NaN	NaN	0	NaN	58573000000	528	288	33244.7	16	0	P61265	P61265	Syntaxin-1B	Stx1b	Stx1b	Syntaxin-1B
NaN	-1.16903	1.27177	NaN	NaN	NaN	NaN	0.0217537	-0.124489		2	2	2	NaN	NaN	NaN	NaN	NaN	NaN	265690000	4	204	24146.1	11	0	P61314	P61314	60S ribosomal protein L15	Rpl15	Rpl15	60S ribosomal protein L15
0.74312	0.608469	1.10508	-1.38349	NaN	-1.33755	-0.116179	-0.540252	0.920801		4	4	4	NaN	NaN	NaN	NaN	0	NaN	630820000	15	136	15797.7	6	0	P61354	P61354	60S ribosomal protein L27	Rpl27	Rpl27	60S ribosomal protein L27
-0.250261	-0.308854	-0.893996	1.09611	0.180492	1.58539	0.836158	-1.31744	-0.927597		8	8	6	NaN	NaN	NaN	NaN	0	NaN	23499000000	568	193	21782.2	8	0	P61589	P61589	Transforming protein RhoA	Rhoa	Rhoa	Transforming protein RhoA
0.258611	-0.475762	1.47308	-1.57066	NaN	NaN	-0.115407	-0.4792	0.909334		7	2	2	NaN	NaN	NaN	NaN	0	NaN	1211200000	33	180	20396.6	10	0	P61751	P61751	ADP-ribosylation factor 4	Arf4	Arf4	ADP-ribosylation factor 4
-0.613675	0.291002	1.16625	-1.90463	0.85032	-0.601288	-0.546116	1.02967	0.328471		29	29	29	NaN	NaN	NaN	NaN	0	NaN	106260000000	1560	594	67568.7	31	0	P61765	P61765	Syntaxin-binding protein 1	Stxbp1	Stxbp1	Syntaxin-binding protein 1
NaN	-0.707107	NaN	NaN	NaN	NaN	NaN	NaN	0.707107		2	2	2	NaN	NaN	NaN	NaN	NaN	NaN	245430000	7	364	41119.2	10	0	P61794	P61794	Lysophosphatidic acid receptor 1	Lpar1	Lpar1	Lysophosphatidic acid receptor 1
-0.00109885	-1.01474	-0.918222	-0.885602	1.97537	NaN	0.146162	0.0526603	0.645473		3	3	3	NaN	NaN	NaN	NaN	0	NaN	518670000	23	113	12496.7	5	0	P61805	P61805	Dolichyl-diphosphooligosaccharide--protein glycosyltransferase subunit DAD1	Dad1	Dad1	Dolichyl-diphosphooligosaccharide--protein glycosyltransferase subunit DAD1
0.770472	0.25058	-0.396126	1.32907	0.499305	-2.10307	-0.178204	0.506215	-0.678237		5	5	5	NaN	NaN	NaN	NaN	0	NaN	2859700000	75	127	14478.5	7	0	P61972	P61972	Nuclear transport factor 2	Nutf2	Nutf2	Nuclear transport factor 2
-0.22506	0.516928	-0.654008	1.0204	-1.76191	-0.978203	1.20409	0.0408221	0.836941		10	10	10	NaN	NaN	NaN	NaN	0	NaN	3809600000	145	463	50976.2	23	0	P61980	P61980	Heterogeneous nuclear ribonucleoprotein K	Hnrnpk	Hnrnpk	Heterogeneous nuclear ribonucleoprotein K
0.92681	1.0943	0.844023	0.123986	-1.0749	0.00921222	0.412423	-0.405666	-1.93019		11	7	6	NaN	NaN	NaN	NaN	0	NaN	35161000000	349	247	28302.6	16	0	P61983	P61983	14-3-3 protein gamma;14-3-3 protein gamma, N-terminally processed	Ywhag	Ywhag	14-3-3 protein gamma
-0.809781	-0.380879	-1.39663	1.34759	NaN	1.28158	0.629323	-0.0450054	-0.626191		3	3	3	NaN	NaN	NaN	NaN	0	NaN	624460000	23	95	10457.9	6	0	P62076	P62076	Mitochondrial import inner membrane translocase subunit Tim13	Timm13	Timm13	Mitochondrial import inner membrane translocase subunit Tim13
-1.15582	0.348976	-0.117209	NaN	-1.12355	NaN	-0.33653	0.79779	1.58634		3	3	3	NaN	NaN	NaN	NaN	0	NaN	294830000	17	194	22126.9	10	0	P62083	P62083	40S ribosomal protein S7	Rps7	Rps7	40S ribosomal protein S7
0.194437	-0.648793	0.879855	-2.08047	0.561417	NaN	1.05231	-0.0669539	0.108198		15	4	3	NaN	NaN	NaN	NaN	0	NaN	2397400000	46	330	37512.1	18	0	P62138	P62138	Serine/threonine-protein phosphatase PP1-alpha catalytic subunit	Ppp1ca	Ppp1ca	Serine/threonine-protein phosphatase PP1-alpha catalytic subunit
-0.430003	0.305915	0.994458	-1.62607	0.596929	-1.19947	-0.58693	0.803656	1.14152		17	17	6	NaN	NaN	30	NaN	0	NaN	8664700000	233	327	37186.8	17	0	P62142	P62142	Serine/threonine-protein phosphatase PP1-beta catalytic subunit	Ppp1cb	Ppp1cb	Serine/threonine-protein phosphatase PP1-beta catalytic subunit
-0.999373	-0.645196	-0.983461	1.73242	0.359697	1.23011	-0.239495	0.410293	-0.865002		11	11	11	NaN	NaN	NaN	NaN	0	NaN	99432000000	669	149	16837.6	9	0	P62161;Q5U206	P62161	Calmodulin	Calm1	Calm1	Calmodulin
-0.148516	-0.691876	-0.543488	1.53731	-0.6103	1.83918	0.00131717	-0.945074	-0.438554		8	8	8	NaN	NaN	NaN	NaN	0	NaN	6619800000	133	190	21878.7	11	0	P62168	P62168	Neuronal calcium sensor 1	Ncs1	Ncs1	Neuronal calcium sensor 1
-0.323425	0.831076	1.04189	-0.837613	-0.459542	-1.84622	-0.23935	1.09026	0.742919		9	9	9	NaN	NaN	NaN	NaN	0	NaN	2302300000	81	440	49184.5	25	0	P62193	P62193	26S protease regulatory subunit 4	Psmc1	Psmc1	26S protease regulatory subunit 4
-0.46625	0.754895	1.47849	-1.84268	-0.09598	-0.733687	-0.37203	0.89332	0.383924		13	13	13	NaN	NaN	NaN	NaN	0	NaN	4918600000	81	406	45626	24	0	P62198	P62198	26S protease regulatory subunit 8	Psmc5	Psmc5	26S protease regulatory subunit 8
0.046277	-0.441728	1.24955	NaN	-0.464072	-1.64133	-0.661346	0.775309	1.13734		7	7	7	NaN	NaN	NaN	NaN	0	NaN	1509800000	41	208	24205.2	9	0	P62243	P62243	40S ribosomal protein S8	Rps8	Rps8	40S ribosomal protein S8
0.215212	-0.465837	0.905004	-0.831036	NaN	-1.43929	0.0888522	-0.231828	1.75893		3	3	3	20	20	20	NaN	0	NaN	1332700000	39	130	14839.5	8	0	P62246	P62246	40S ribosomal protein S15a	Rps15a	Rps15a	40S ribosomal protein S15a
-0.248474	-0.578622	0.810086	-1.48143	NaN	NaN	-0.528316	0.555356	1.47141		5	5	5	NaN	NaN	NaN	NaN	0	NaN	1049900000	38	146	16445.3	11	0	P62250	P62250	40S ribosomal protein S16	Rps16	Rps16	40S ribosomal protein S16
1.55929	0.646948	0.687629	0.661364	-1.46822	0.279079	-0.527359	-1.05663	-0.782096		18	18	15	NaN	NaN	NaN	NaN	0	NaN	187550000000	1994	255	29173.9	17	0	P62260	P62260	14-3-3 protein epsilon	Ywhae	Ywhae	14-3-3 protein epsilon
-0.0939047	NaN	-0.347238	NaN	NaN	NaN	NaN	-0.956991	1.39813		3	3	3	NaN	NaN	NaN	NaN	NaN	NaN	775730000	8	152	17718.7	9	0	P62271	P62271	40S ribosomal protein S18	Rps18	Rps18	40S ribosomal protein S18
-0.0601971	0.354259	1.50361	-1.08913	-0.864812	-1.31445	-0.414247	0.940242	0.94472		7	7	7	NaN	NaN	NaN	NaN	0	NaN	1408400000	58	151	17222.3	9	0	P62278	P62278	40S ribosomal protein S13	Rps13	Rps13	40S ribosomal protein S13
-0.200785	-0.192161	1.38145	-1.94474	-0.452902	-0.135877	-0.38204	0.908523	1.01853		6	6	6	NaN	NaN	NaN	NaN	0	NaN	1316600000	38	158	18430.7	10	0	P62282	P62282	40S ribosomal protein S11	Rps11	Rps11	40S ribosomal protein S11
NaN	-0.811335	NaN	-0.395226	NaN	1.1279	1.01664	-0.937982	NaN		2	2	2	NaN	NaN	NaN	NaN	0	NaN	494110000	17	44	5052.65	2	0	P62329	P62329	Thymosin beta-4;Hematopoietic system regulatory peptide	Tmsb4x	Tmsb4x	Thymosin beta-4
0.390706	0.829536	0.411787	-0.754191	-2.11431	-0.658924	0.239326	1.03755	0.618525		5	5	5	NaN	NaN	NaN	NaN	0	NaN	2622300000	72	175	20082.2	8	0	P62332	P62332	ADP-ribosylation factor 6	Arf6	Arf6	ADP-ribosylation factor 6
-0.507772	0.00737858	1.0915	-1.80638	NaN	-0.0393181	-0.641946	0.753788	1.14276		5	5	5	NaN	NaN	NaN	NaN	0	NaN	1411900000	32	266	29995.6	10	0	P62425	P62425	60S ribosomal protein L7a	Rpl7a	Rpl7a	60S ribosomal protein L7a
0.217005	0.846337	0.297884	-0.225155	1.17226	-2.11506	-0.955987	0.530875	0.23184		11	11	10	NaN	NaN	NaN	NaN	0	NaN	9953300000	216	367	41021.3	18	0	P62483	P62483	Voltage-gated potassium channel subunit beta-2	Kcnab2	Kcnab2	Voltage-gated potassium channel subunit beta-2
-0.471644	-0.766904	-0.876741	1.91387	-0.174299	1.33633	0.201551	-0.245124	-0.917041		5	5	5	NaN	NaN	NaN	NaN	0	NaN	1929000000	58	96	10989.7	6	0	P62628	P62628	Dynein light chain roadblock-type 1	Dynlrb1	Dynlrb1	Dynein light chain roadblock-type 1
0.804837	0.55337	0.583942	-0.692705	-1.41674	-1.59899	-0.0404187	1.02077	0.785935		15	15	9	NaN	NaN	NaN	NaN	0	NaN	103740000000	489	462	50113.8	21	0	P62630	P62630	Elongation factor 1-alpha 1	Eef1a1	Eef1a1	Elongation factor 1-alpha 1
0.621343	0.998253	1.52443	-0.248948	-1.47244	-1.29564	-0.49609	0.3724	-0.00331189		15	9	9	NaN	NaN	NaN	NaN	0	NaN	13345000000	176	463	50454.2	21	0	P62632	P62632	Elongation factor 1-alpha 2	Eef1a2	Eef1a2	Elongation factor 1-alpha 2
-0.665434	-0.378705	1.77797	-1.65576	-0.144803	0.188143	-0.580688	0.567263	0.892021		5	5	5	NaN	NaN	NaN	NaN	0	NaN	1128000000	45	263	29597.7	16	0	P62703	P62703	40S ribosomal protein S4, X isoform	Rps4x	Rps4x	40S ribosomal protein S4, X isoform
-1.0667	0.158903	NaN	NaN	1.44128	NaN	-0.822302	NaN	0.288819		3	3	3	NaN	NaN	NaN	NaN	NaN	NaN	229850000	15	176	20732.3	9	0	P62718	P62718	60S ribosomal protein L18a	Rpl18a	Rpl18a	60S ribosomal protein L18a
-1.20206	-0.963287	-0.0983801	NaN	NaN	-0.0122196	-0.148523	0.639427	1.78504		22	1	1	NaN	NaN	NaN	NaN	0	NaN	1690000000	33	376.5	41942.9	20	0	P62738;P63269	P62738;P63269	Actin, aortic smooth muscle;Actin, gamma-enteric smooth muscle	Acta2;Actg2	Acta2;Actg2	Actin, aortic smooth muscle;Actin, gamma-enteric smooth muscle
0.65338	0.38108	0.699535	-0.518935	-2.45942	-0.0639516	0.29118	0.593174	0.423959		6	6	6	NaN	NaN	NaN	NaN	0	NaN	4246200000	104	142	17017.7	6	0	P62744	P62744	AP-2 complex subunit sigma	Ap2s1	Ap2s1	AP-2 complex subunit sigma
-0.193261	-0.655979	-0.43313	1.02994	-1.52154	1.88761	0.469791	-0.205442	-0.377993		7	5	5	NaN	NaN	NaN	NaN	0	NaN	13888000000	196	196	22123.4	9	0	P62747	P62747	Rho-related GTP-binding protein RhoB	Rhob	Rhob	Rho-related GTP-binding protein RhoB
0.185457	-0.560355	-0.653596	1.71156	-0.444273	1.58463	-0.0840276	-1.05234	-0.687062		10	10	7	NaN	NaN	NaN	NaN	0	NaN	16780000000	356	193	22338.2	15	0	P62749	P62749	Hippocalcin-like protein 1	Hpcal1	Hpcal1	Hippocalcin-like protein 1
NaN	NaN	0.0984516	NaN	-0.63098	NaN	-1.26361	0.460799	1.33534		3	3	3	NaN	NaN	NaN	NaN	0	NaN	723060000	24	249	28680.6	8	0	P62755	P62755	40S ribosomal protein S6	Rps6	Rps6	40S ribosomal protein S6
0.242306	-0.370605	-0.578373	1.57611	-0.501988	1.49005	0.333988	-1.08626	-1.10524		13	13	12	NaN	NaN	NaN	NaN	0	NaN	96328000000	667	191	22142.3	13	0	P62762	P62762	Visinin-like protein 1	Vsnl1	Vsnl1	Visinin-like protein 1
-0.507508	-1.41596	NaN	0.66549	-0.621531	1.69184	0.212945	-0.0252757	NaN		2	2	2	NaN	NaN	NaN	NaN	0	NaN	1764700000	31	118	12860.8	6	0	P62775	P62775	Myotrophin	Mtpn	Mtpn	Myotrophin
-1.05677	-1.08514	-0.787091	0.16579	-0.1412	1.72703	-0.441854	1.334	0.285237		6	6	6	NaN	NaN	NaN	NaN	0	NaN	6056600000	51	103	11367.3	6	0	P62804	P62804	Histone H4;Osteogenic growth peptide	Hist1h4b	Hist1h4b	Histone H4
0.239705	0.982262	0.907525	-1.95	1.055	-1.01914	-0.420261	0.0683731	0.136536		21	21	21	NaN	NaN	NaN	NaN	0	NaN	67636000000	954	511	56550.8	25	0	P62815	P62815	V-type proton ATPase subunit B, brain isoform	Atp6v1b2	Atp6v1b2	V-type proton ATPase subunit B, brain isoform
0.39935	0.754131	1.05832	-1.90908	0.85764	-0.907084	-0.85459	0.163326	0.43799		5	5	4	NaN	NaN	NaN	NaN	0	NaN	1750600000	65	227	25872.1	13	0	P62824	P62824	Ras-related protein Rab-3C	Rab3c	Rab3c	Ras-related protein Rab-3C
0.731187	1.05974	0.504267	-0.366971	1.07727	-1.56019	-1.53003	0.126337	-0.0416085		6	6	6	NaN	NaN	NaN	NaN	0	NaN	12805000000	136	216	24437.2	10.5	0	P62828;Q8K586	P62828;Q8K586	GTP-binding nuclear protein Ran;GTP-binding nuclear protein Ran, testis-specific isoform	Ran;Rasl2-9	Ran;Rasl2-9	GTP-binding nuclear protein Ran;GTP-binding nuclear protein Ran, testis-specific isoform
0.101561	0.654054	1.73673	-0.624641	-1.06778	-1.46797	-0.331892	0.146198	0.853734		4	4	4	NaN	NaN	NaN	NaN	0	NaN	1301200000	38	140	14865.4	9	0	P62832	P62832	60S ribosomal protein L23	Rpl23	Rpl23	60S ribosomal protein L23
-0.735987	-0.901782	-0.656049	-1.42357	0.924162	-0.249812	1.035	0.700426	1.30761		9	9	5	56	56	NaN	NaN	0	NaN	27829000000	243	184	20987.2	10	0	P62836	P62836	Ras-related protein Rap-1A	Rap1a	Rap1a	Ras-related protein Rap-1A
-0.152752	-0.291439	-0.0311745	-0.541767	NaN	-0.64769	2.21251	-1.02636	0.478666		3	3	3	NaN	NaN	NaN	NaN	0	NaN	1717300000	28	125	13742.1	5	0	P62853	P62853	40S ribosomal protein S25	Rps25	Rps25	40S ribosomal protein S25
0.650353	-0.508204	-0.657533	1.69907	-1.59326	1.13137	-0.215709	-0.196098	-0.309994		5	5	5	NaN	NaN	NaN	NaN	0	NaN	3513500000	60	118	13169.9	10	0	P62870	P62870	Transcription elongation factor B polypeptide 2	Tceb2	Tceb2	Transcription elongation factor B polypeptide 2
1.30193	0.471014	0.370311	-0.655888	-1.9202	0.973078	-0.862698	-0.0455399	0.36799		9	9	9	34	34	34	NaN	0	NaN	3935300000	117	353	38731.6	17	0	P62882	P62882	Guanine nucleotide-binding protein subunit beta-5	Gnb5	Gnb5	Guanine nucleotide-binding protein subunit beta-5
0.121415	-0.896425	-0.210263	NaN	NaN	-0.45113	-1.02022	1.88998	0.566643		5	5	5	NaN	NaN	NaN	NaN	0	NaN	760920000	10	115	12784.1	6	0	P62890	P62890	60S ribosomal protein L30	Rpl30	Rpl30	60S ribosomal protein L30
0.651094	-0.155323	0.647447	0.243001	-1.67518	0.702867	0.978637	-1.65704	0.264495		8	8	8	NaN	NaN	NaN	NaN	0	NaN	10594000000	111	105	11605.4	6	0	P62898;CON__P62894;P10715	P62898	Cytochrome c, somatic	Cycs	Cycs	Cytochrome c, somatic
-0.296605	-0.366591	1.85837	-1.25084	NaN	-0.748867	-0.420527	0.244121	0.98094		4	4	4	NaN	NaN	NaN	NaN	0	NaN	1212800000	24	217	24831.3	10	0	P62907	P62907	60S ribosomal protein L10a	Rpl10a	Rpl10a	60S ribosomal protein L10a
0.0877839	-0.246248	1.23597	-0.981477	-1.4054	-0.465011	-0.584523	0.928975	1.42993		14	14	14	NaN	NaN	NaN	NaN	0	NaN	8743300000	196	243	26674.3	19	0	P62909	P62909	40S ribosomal protein S3	Rps3	Rps3	40S ribosomal protein S3
0.237954	-0.337638	1.24881	-0.973705	NaN	-0.882845	-1.14791	0.425911	1.42942		2	2	2	NaN	NaN	NaN	NaN	0	NaN	2377700000	19	178	20252.4	10	0	P62914	P62914	60S ribosomal protein L11	Rpl11	Rpl11	60S ribosomal protein L11
1.4324	0.208777	1.24006	0.199919	-0.585892	-1.73494	-0.754441	-0.45262	0.446739		33	33	18	NaN	NaN	NaN	NaN	0	NaN	41575000000	727	937	104553	44	0	P62944	P62944	AP-2 complex subunit beta	Ap2b1	Ap2b1	AP-2 complex subunit beta
-0.652765	0.0791532	-0.353109	2.23484	-0.888447	0.226412	-0.226979	0.647323	-1.06643		5	5	5	NaN	NaN	NaN	NaN	0	NaN	4699000000	75	126	13776.9	8	0	P62959	P62959	Histidine triad nucleotide-binding protein 1	Hint1	Hint1	Histidine triad nucleotide-binding protein 1
0.184907	-1.19733	-1.11047	0.215622	NaN	1.96116	0.0464125	0.396622	-0.496926		6	6	6	29	29	29	NaN	0	NaN	870000000	32	217	25206.4	14	0	P62994	P62994	Growth factor receptor-bound protein 2	Grb2	Grb2	Growth factor receptor-bound protein 2
1.68823	0.213315	0.581419	-0.785152	1.18038	-0.511191	-1.4334	-0.417795	-0.515811		21	21	21	NaN	NaN	NaN	NaN	0	NaN	36663000000	568	410	46670	23	0	P63004	P63004	Platelet-activating factor acetylhydrolase IB subunit alpha	Pafah1b1	Pafah1b1	Platelet-activating factor acetylhydrolase IB subunit alpha
0.216858	0.48348	2.0077	-1.16192	0.301573	-0.694245	-1.21057	0.414732	-0.357618		6	6	5	NaN	NaN	NaN	NaN	0	NaN	22521000000	250	220	24969.9	13	0	P63012	P63012	Ras-related protein Rab-3A	Rab3a	Rab3a	Ras-related protein Rab-3A
0.515705	0.368202	-2.57161	0.689637	0.0770697	0.457154	0.500185	0.13004	-0.166385		33	33	24	56	56	NaN	NaN	0	NaN	500550000000	3443	646	70871.1	33	0	P63018	P63018	Heat shock cognate 71 kDa protein	Hspa8	Hspa8	Heat shock cognate 71 kDa protein
NaN	NaN	NaN	NaN	NaN	NaN	1.13493	-0.75174	-0.383185		3	1	1	NaN	NaN	NaN	NaN	0	NaN	643980000	25	103	11480.3	5	0	P63025	P63025	Vesicle-associated membrane protein 3	Vamp3	Vamp3	Vesicle-associated membrane protein 3
-0.149218	-0.130384	-0.410371	1.73647	-1.63966	1.0139	-0.093159	0.542689	-0.870259		5	5	5	NaN	NaN	NaN	NaN	0	NaN	2881300000	55	172	19462.2	6	0	P63029	P63029	Translationally-controlled tumor protein	Tpt1	Tpt1	Translationally-controlled tumor protein
-1.36617	-1.42818	0.615556	0.152699	-0.513049	1.25735	1.26514	0.359604	-0.342944		7	7	7	NaN	NaN	NaN	NaN	0	NaN	3738300000	69	397	44868.2	21	0	P63036	P63036	DnaJ homolog subfamily A member 1	Dnaja1	Dnaja1	DnaJ homolog subfamily A member 1
0.0846758	-0.297793	-0.513038	1.43389	-0.216021	1.56481	0.246545	-0.717494	-1.58557		27	27	27	62	62	62	NaN	0	NaN	80989000000	999	573	60955.5	33	0	P63039	P63039	60 kDa heat shock protein, mitochondrial	Hspd1	Hspd1	60 kDa heat shock protein, mitochondrial
-0.57769	-0.267696	-1.24035	1.73858	-0.108092	1.07849	0.398816	0.256212	-1.27827		4	4	2	NaN	NaN	NaN	NaN	0	NaN	3037800000	107	134	15122.1	5	0	P63041	P63041	Complexin-1	Cplx1	Cplx1	Complexin-1
-0.286114	-0.506224	-0.665266	0.926627	-0.650735	1.71623	1.20817	-0.953804	-0.788883		6	6	4	NaN	NaN	NaN	NaN	0	NaN	12230000000	213	116	12690.8	5	0	P63045	P63045	Vesicle-associated membrane protein 2	Vamp2	Vamp2	Vesicle-associated membrane protein 2
0.189336	0.409115	0.800071	-0.866539	1.61025	-1.14389	-1.44274	-0.180399	0.624791		9	9	9	NaN	NaN	NaN	NaN	0	NaN	5078500000	146	284	33053.8	14	0	P63047	P63047	Sulfotransferase 4A1	Sult4a1	Sult4a1	Sulfotransferase 4A1
0.874563	0.976669	0.949064	-1.59032	-0.929946	-0.754749	0.928311	-0.702376	0.248779		4	4	4	NaN	NaN	NaN	NaN	0	NaN	1538000000	47	217	25053.2	11	0	P63074	P63074	Eukaryotic translation initiation factor 4E	Eif4e	Eif4e	Eukaryotic translation initiation factor 4E
0.516877	-0.22425	-0.853156	1.10424	NaN	1.35401	0.418567	-1.30682	-1.00947		2	2	2	NaN	NaN	NaN	NaN	0	NaN	2205500000	35	70	7843.15	4	0	P63077	P63077	Guanine nucleotide-binding protein G(I)/G(S)/G(O) subunit gamma-8	Gng8	Gng8	Guanine nucleotide-binding protein G(I)/G(S)/G(O) subunit gamma-8
1.1214	-0.804584	1.71921	-0.683653	NaN	-0.298514	-1.23258	-0.0650683	0.243788		4	4	2	NaN	NaN	NaN	NaN	0	NaN	366270000	15	473	54165.7	17	0	P63079	P63079	Gamma-aminobutyric acid receptor subunit beta-3	Gabrb3	Gabrb3	Gamma-aminobutyric acid receptor subunit beta-3
0.535192	0.814307	0.783275	-1.87253	0.242489	-0.00493044	-1.49811	0.248057	0.752254		19	19	17	NaN	NaN	57	NaN	0	NaN	36054000000	555	358	41275.6	22	0	P63086	P63086	Mitogen-activated protein kinase 1	Mapk1	Mapk1	Mitogen-activated protein kinase 1
-0.828488	NaN	NaN	NaN	NaN	-0.370011	-0.254711	1.45321	NaN		15	3	3	NaN	NaN	NaN	NaN	0	NaN	543260000	9	323	36983.8	16	0	P63088	P63088	Serine/threonine-protein phosphatase PP1-gamma catalytic subunit	Ppp1cc	Ppp1cc	Serine/threonine-protein phosphatase PP1-gamma catalytic subunit
-0.143367	0.789678	0.746859	-2.38549	0.0499651	-0.0386193	-0.292003	0.313997	0.958981		10	9	9	32	NaN	NaN	NaN	0	NaN	10860000000	175	769	84275.1	29	0	P63095;Q63803;P38406	P63095;Q63803	Guanine nucleotide-binding protein G(s) subunit alpha isoforms short;Guanine nucleotide-binding protein G(s) subunit alpha isoforms XLas	Gnas	Gnas	Guanine nucleotide-binding protein G(s) subunit alpha isoforms short;Guanine nucleotide-binding protein G(s) subunit alpha isoforms XLas
0.0907086	-0.448634	-0.247544	2.10923	-1.08268	0.920815	-0.0526792	-0.182837	-1.10638		7	7	7	NaN	NaN	NaN	NaN	0	NaN	4068000000	98	170	19299.9	9	0	P63100	P63100	Calcineurin subunit B type 1	Ppp3r1	Ppp3r1	Calcineurin subunit B type 1
0.496662	0.133737	0.203079	0.869562	-1.47107	1.61092	0.221028	-1.04267	-1.02124		16	13	12	NaN	NaN	NaN	NaN	0	NaN	95617000000	668	245	27771.1	14	0	P63102	P63102	14-3-3 protein zeta/delta	Ywhaz	Ywhaz	14-3-3 protein zeta/delta
-0.328033	-0.698582	-0.16135	1.53876	0.61327	1.30262	-1.65927	-0.301668	-0.305739		14	14	8	NaN	NaN	NaN	NaN	0	NaN	12952000000	241	499	56700.8	20	0	P63142	P63142	Potassium voltage-gated channel subfamily A member 2	Kcna2	Kcna2	Potassium voltage-gated channel subfamily A member 2
-0.69805	-0.899539	0.638494	-1.09185	1.87683	NaN	0.661247	-0.130972	-0.356167		7	6	5	NaN	NaN	NaN	NaN	0	NaN	536130000	16	401	44709.5	22	0	P63144	P63144	Voltage-gated potassium channel subunit beta-1	Kcnab1	Kcnab1	Voltage-gated potassium channel subunit beta-1
0.521268	0.326133	0.297465	1.37152	NaN	-1.83956	0.630746	-0.742244	-0.565327		6	6	6	NaN	NaN	NaN	NaN	0	NaN	2274300000	64	215	24893.8	6	0	P63159;P52925	P63159	High mobility group protein B1	Hmgb1	Hmgb1	High mobility group protein B1
1.13879	-0.095808	0.88094	-0.977166	-0.77957	-1.30065	1.57194	-0.438943	0.000462412		3	1	1	NaN	NaN	NaN	NaN	0	NaN	4566200000	106	89	10365.9	5	0	P63170	P63170	Dynein light chain 1, cytoplasmic	Dynll1	Dynll1	Dynein light chain 1, cytoplasmic
-0.227746	0.291402	0.750032	-0.670964	-1.8833	-0.634933	0.0140725	0.943967	1.41747		18	18	18	NaN	NaN	NaN	NaN	0	NaN	8463000000	251	317	35076.7	20	0	P63245	P63245	Guanine nucleotide-binding protein subunit beta-2-like 1;Guanine nucleotide-binding protein subunit beta-2-like 1, N-terminally processed	Gnb2l1	Rack1	Receptor of activated protein C kinase 1
0.366353	-0.0381713	-1.17094	-1.41235	1.47216	-1.03709	0.855373	0.653659	0.311019		23	23	1	NaN	NaN	NaN	NaN	0	NaN	843240000000	5000	375	41792.8	20	0	P63259	P63259	Actin, cytoplasmic 2;Actin, cytoplasmic 2, N-terminally processed	Actg1	Actg1	Actin, cytoplasmic 2
0.085432	0.581054	0.143692	-0.457591	-2.32842	0.478838	1.32466	0.134438	0.0378939		6	6	4	NaN	NaN	15	NaN	0	NaN	11454000000	180	206	23552.8	9	0	P63322	P63322	Ras-related protein Ral-A	Rala	Rala	Ras-related protein Ral-A
-0.549211	-1.97234	NaN	0.623558	NaN	1.06755	0.434826	0.276711	0.118906		2	2	2	NaN	NaN	NaN	NaN	0	NaN	1024700000	34	132	14525	7	0	P63324	P63324	40S ribosomal protein S12	Rps12	Rps12	40S ribosomal protein S12
0.866015	-0.20469	0.541429	-1.14759	NaN	-1.7462	-0.0429859	0.719466	1.01456		3	3	3	23	23	23	NaN	0	NaN	533010000	46	165	18915.7	8	0	P63326	P63326	40S ribosomal protein S10	Rps10	Rps10	40S ribosomal protein S10
0.817986	0.726736	0.963619	-0.17027	-2.08229	-0.753823	-0.141568	-0.278694	0.918309		13	13	7	NaN	NaN	NaN	NaN	0	NaN	22251000000	247	521	58643.8	23	0	P63329	P63329	Serine/threonine-protein phosphatase 2B catalytic subunit alpha isoform	Ppp3ca	Ppp3ca	Serine/threonine-protein phosphatase 2B catalytic subunit alpha isoform
0.492171	0.719121	1.32589	-1.78364	0.0667822	-0.90064	-0.756536	0.949062	-0.112204		11	11	1	NaN	NaN	NaN	NaN	0	NaN	18911000000	360	309	35608.2	16	0	P63331	P63331	Serine/threonine-protein phosphatase 2A catalytic subunit alpha isoform	Ppp2ca	Ppp2ca	Serine/threonine-protein phosphatase 2A catalytic subunit alpha isoform
-0.435966	0.420399	1.06211	-2.16198	0.445073	-0.837064	0.181756	0.561653	0.764017		10	10	10	NaN	NaN	NaN	NaN	0	NaN	15602000000	257	272	29820.1	18	0	P67779	P67779	Prohibitin	Phb	Phb	Prohibitin
-0.716263	-1.12492	-0.613596	NaN	1.48147	NaN	-0.576951	1.01569	0.534577		3	3	3	NaN	NaN	NaN	NaN	0	NaN	827920000	29	215	24942.4	10	0	P67874	P67874	Casein kinase II subunit beta	Csnk2b	Csnk2b	Casein kinase II subunit beta
-0.674994	-1.01288	-0.817758	-0.279218	0.610734	0.186655	-0.686374	0.525085	2.14875		22	9	0	NaN	NaN	0	NaN	0	NaN	91143000000	458	377	42019	20	0	P68035	P68035	Actin, alpha cardiac muscle 1	Actc1	Actc1	Actin, alpha cardiac muscle 1
1.28564	-0.327265	-0.498296	-0.961523	0.0507187	-1.12012	-0.883236	1.13066	1.32342		15	15	15	NaN	NaN	NaN	NaN	0	NaN	4015300000	168	315	36108.2	22	0	P68101	P68101	Eukaryotic translation initiation factor 2 subunit 1	Eif2s1	Eif2s1	Eukaryotic translation initiation factor 2 subunit 1
0.276828	0.671417	1.62423	-0.473603	-1.08306	-1.41353	-0.64412	0.0302747	1.01156		11	11	4	NaN	NaN	NaN	NaN	0	NaN	4256100000	114	351	40707.9	18	0	P68182	P68182	cAMP-dependent protein kinase catalytic subunit beta	Prkacb	Prkacb	cAMP-dependent protein kinase catalytic subunit beta
0.611796	-0.754121	-0.0415763	0.622794	-0.375925	1.78349	0.556669	-1.47346	-0.929662		14	10	10	NaN	NaN	NaN	NaN	0	NaN	25764000000	439	245	27778.3	14	0	P68255	P68255	14-3-3 protein theta	Ywhaq	Ywhaq	14-3-3 protein theta
-0.940648	-0.299624	0.630308	-1.63001	1.14581	-0.053908	-0.562553	1.51706	0.193566		27	3	1	NaN	NaN	NaN	NaN	0	NaN	25565000000	246	450.5	50047.6	21	0	P68370;Q68FR8	P68370;Q68FR8	Tubulin alpha-1A chain;Tubulin alpha-3 chain	Tuba1a;Tuba3a	Tuba1a;Tuba3a	Tubulin alpha-1A chain;Tubulin alpha-3 chain
-0.0715689	-0.354864	1.15009	-1.81242	0.563898	-0.279818	-1.0166	0.616455	1.20483		13	13	7	NaN	NaN	NaN	NaN	0	NaN	3519100000	91	671	76750.8	35	0	P68403	P68403	Protein kinase C beta type	Prkcb	Prkcb	Protein kinase C beta type
0.505443	1.57718	1.01334	-0.0632607	-1.78396	0.139403	-0.452408	-0.904766	-0.030968		12	9	8	NaN	NaN	NaN	NaN	0	NaN	14842000000	276	246	28211.7	16	0	P68511	P68511	14-3-3 protein eta	Ywhah	Ywhah	14-3-3 protein eta
-0.539273	0.230858	0.122573	1.10381	NaN	0.0937713	1.21681	-1.96569	-0.262857		5	5	5	NaN	NaN	NaN	NaN	0	NaN	1648800000	66	277	29792.4	12	0	P69682	P69682	Adaptin ear-binding coat-associated protein 1	Necap1	Necap1	Adaptin ear-binding coat-associated protein 1
-1.19618	-0.673988	0.904948	NaN	0.554536	NaN	-1.15681	1.24294	0.32455		7	7	7	NaN	NaN	NaN	NaN	0	NaN	745180000	13	775	86586.7	40	0	P69735	P69735	Rab3 GTPase-activating protein catalytic subunit	Rab3gap1	Rab3gap1	Rab3 GTPase-activating protein catalytic subunit (Fragments)
-0.949884	0.249069	0.898099	-1.78224	0.678253	-0.696354	0.287156	1.41937	-0.103464		27	5	5	NaN	NaN	NaN	NaN	0	NaN	37196000000	332	444	49670.8	20	0	P69897	P69897	Tubulin beta-5 chain	Tubb5	Tubb5	Tubulin beta-5 chain
1.30228	0.0878103	NaN	NaN	NaN	NaN	0.335603	-1.45222	-0.273473		4	4	4	NaN	NaN	NaN	NaN	0	NaN	205480000	14	382	41828.1	20	0	P70473	P70473	Alpha-methylacyl-CoA racemase	Amacr	Amacr	Alpha-methylacyl-CoA racemase
1.34226	-0.185501	-0.494614	-2.0258	-0.759804	0.448475	0.472563	0.388167	0.81425		10	10	10	NaN	NaN	NaN	NaN	0	NaN	1144500000	41	780	86226.1	37	0	P70483	P70483	Striatin	Strn	Strn	Striatin
NaN	1.26622	NaN	NaN	NaN	-0.665136	-0.66705	-0.835105	0.901073		5	5	5	NaN	NaN	NaN	NaN	0	NaN	209220000	13	1074	123814	53	0	P70496	P70496	Phospholipase D1	Pld1	Pld1	Phospholipase D1
0.951665	-0.142599	0.633236	-0.911563	NaN	-1.37761	-0.721785	1.55664	0.0120105		2	2	2	NaN	NaN	NaN	NaN	0	NaN	621390000	17	213	23612.9	9	0	P70500	P70500	CDP-diacylglycerol--inositol 3-phosphatidyltransferase	Cdipt	Cdipt	CDP-diacylglycerol--inositol 3-phosphatidyltransferase
0.67556	-0.220516	-0.806226	-1.41092	NaN	NaN	1.68456	0.121072	-0.0435292		5	5	5	15	15	15	NaN	0	NaN	749250000	22	452	50435.5	25	0	P70541	P70541	Translation initiation factor eIF-2B subunit gamma	Eif2b3	Eif2b3	Translation initiation factor eIF-2B subunit gamma
0.844962	NaN	NaN	-0.296908	NaN	NaN	0.737829	NaN	-1.28588		4	1	1	NaN	NaN	NaN	NaN	0	NaN	297620000	12	207	23603.1	12	0	P70550	P70550	Ras-related protein Rab-8B	Rab8b	Rab8b	Ras-related protein Rab-8B
0.200765	0.148503	0.355432	1.35484	-2.10176	0.659153	0.599832	-0.717389	-0.499376		9	9	9	NaN	NaN	NaN	NaN	0	NaN	6673200000	154	351	39491.8	19	0	P70566;P70567	P70566	Tropomodulin-2	Tmod2	Tmod2	Tropomodulin-2
-0.0740279	-0.859046	-0.955418	1.62891	-0.47468	1.65393	0.229233	-0.66678	-0.482121		10	10	9	NaN	NaN	NaN	NaN	0	NaN	9861300000	238	195	21598.1	8	0	P70580	P70580	Membrane-associated progesterone receptor component 1	Pgrmc1	Pgrmc1	Membrane-associated progesterone receptor component 1
-0.278634	-1.09122	-0.500826	1.91594	-1.39728	0.776403	0.488907	-0.0339915	0.1207		10	10	10	NaN	NaN	NaN	NaN	0	NaN	1699200000	62	587	66606.4	36	0	P70615	P70615	Lamin-B1	Lmnb1	Lmnb1	Lamin-B1
0.235804	0.939692	0.725376	-1.41505	1.62241	0.151882	-0.758292	-0.455283	-1.04655		6	6	6	21	21	21	NaN	0	NaN	2581600000	41	424	46301.1	18	0	P70619	P70619	Glutathione reductase	Gsr	Gsr	Glutathione reductase
-1.00899	-0.891468	-1.34429	1.33854	1.35632	0.617045	0.310745	-0.505268	0.127368		19	19	19	NaN	NaN	NaN	NaN	0	NaN	10794000000	282	752	84539.8	41	0	P70627	P70627	Glutamate carboxypeptidase 2	Folh1	Folh1	Glutamate carboxypeptidase 2
0.31285	-0.0144289	-1.0807	-0.834229	2.31897	-0.574635	-0.505844	0.227301	0.150713		9	9	9	NaN	NaN	NaN	NaN	0	NaN	8197400000	133	454	52322.9	26	0	P70645	P70645	Bleomycin hydrolase	Blmh	Blmh	Bleomycin hydrolase
-0.68283	-0.971875	-0.670811	1.83529	-0.0974599	1.42635	0.288431	-0.629043	-0.498054		6	6	6	NaN	NaN	NaN	NaN	0	NaN	1205300000	28	118	13133.3	9	0	P80254	P80254	D-dopachrome decarboxylase	Ddt	Ddt	D-dopachrome decarboxylase
-0.230233	0.799966	1.78636	0.254933	-0.331004	-1.30099	-1.45466	0.138573	0.337051		6	6	6	NaN	NaN	NaN	NaN	0	NaN	1216800000	45	554	62340.3	31	0	P80299	P80299	Bifunctional epoxide hydrolase 2;Cytosolic epoxide hydrolase 2;Lipid-phosphate phosphatase	Ephx2	Ephx2	Bifunctional epoxide hydrolase 2
-0.130216	-0.713953	0.764704	0.0897715	NaN	-1.32968	0.573357	-0.950893	1.69691		7	7	7	NaN	NaN	NaN	NaN	0	NaN	772070000	21	330	37386.2	21	0	P80385	P80385	5-AMP-activated protein kinase subunit gamma-1	Prkag1	Prkag1	5'-AMP-activated protein kinase subunit gamma-1
-0.354493	0.42939	1.2999	-1.43446	-0.847376	-1.26414	0.713696	0.894532	0.562949		8	8	8	NaN	NaN	NaN	NaN	0	NaN	805700000	34	1499	170480	78	0	P81128	P81128	Rho GTPase-activating protein 35	Arhgap35	Arhgap35	Rho GTPase-activating protein 35
-0.690915	0.271902	1.36136	-1.9183	0.677657	-0.861609	-0.00170995	0.440689	0.720924		16	16	15	NaN	NaN	NaN	NaN	0	NaN	60757000000	644	295	31745.8	16	0	P81155	P81155	Voltage-dependent anion-selective channel protein 2	Vdac2	Vdac2	Voltage-dependent anion-selective channel protein 2
1.34389	-0.26725	-0.251189	-0.756117	-1.61616	-0.497979	1.24805	-0.215101	1.01186		14	14	3	NaN	NaN	NaN	NaN	0	NaN	11595000000	119	472	51079.5	21	0	P81795	P81795	Eukaryotic translation initiation factor 2 subunit 3	Eif2s3	Eif2s3	Eukaryotic translation initiation factor 2 subunit 3, X-linked
NaN	NaN	0.900159	NaN	NaN	NaN	-1.32703	-0.197404	0.624279		4	4	4	NaN	NaN	NaN	NaN	0	NaN	376910000	6	343	37196.3	16	0	P81799	P81799	N-acetyl-D-glucosamine kinase	Nagk	Nagk	N-acetyl-D-glucosamine kinase
NaN	NaN	NaN	1.08903	NaN	NaN	NaN	-0.212078	-0.87695		2	2	2	NaN	NaN	NaN	NaN	NaN	NaN	223840000	5	542	60466.4	29	0	P82450	P82450	Sialate O-acetylesterase;Sialate O-acetylesterase small subunit;Sialate O-acetylesterase large subunit	Siae	Siae	Sialate O-acetylesterase
1.19333	-0.0606262	1.4967	-0.70847	-0.931262	-1.09897	-0.612341	-0.387481	1.10913		13	13	7	NaN	NaN	NaN	NaN	0	NaN	16843000000	307	359	42144.1	19	0	P82471	P82471	Guanine nucleotide-binding protein G(q) subunit alpha	Gnaq	Gnaq	Guanine nucleotide-binding protein G(q) subunit alpha
1.0115	0.466036	-1.22407	1.87034	-0.478933	0.328063	-0.436998	-0.934801	-0.601135		34	25	25	NaN	NaN	NaN	NaN	0	NaN	148090000000	1870	733	84814.9	33	0	P82995	P82995	Heat shock protein HSP 90-alpha	Hsp90aa1	Hsp90aa1	Heat shock protein HSP 90-alpha
NaN	NaN	NaN	NaN	NaN	NaN	-0.707107	0.707107	NaN		2	2	2	NaN	NaN	NaN	NaN	NaN	NaN	189020000	5	157	17779	8	0	P83732	P83732	60S ribosomal protein L24	Rpl24	Rpl24	60S ribosomal protein L24
-0.582464	-0.495914	-0.718786	0.0357475	NaN	2.08429	-0.781177	0.876196	-0.417895		4	4	4	NaN	NaN	NaN	NaN	0	NaN	2433400000	15	160	18721.4	9	0	P83868	P83868	Prostaglandin E synthase 3	Ptges3	Ptges3	Prostaglandin E synthase 3
0.478057	-0.261068	-0.721514	0.774197	-2.14494	1.22428	0.490725	0.419282	-0.259023		3	3	3	NaN	NaN	NaN	NaN	0	NaN	2609300000	43	112	12473.2	7	0	P83941	P83941	Transcription elongation factor B polypeptide 1	Tceb1	Tceb1	Transcription elongation factor B polypeptide 1
0.270938	0.0264291	1.57633	-0.240729	-1.74306	-0.974747	-0.455888	0.771161	0.769567		6	6	6	NaN	NaN	NaN	NaN	0	NaN	1774600000	69	537	60217.8	22	0	P83953;Q56R16	P83953;Q56R16	Importin subunit alpha-5;Importin subunit alpha-5, N-terminally processed;Importin subunit alpha-6	Kpna1;Kpna5	Kpna1;Kpna5	Importin subunit alpha-5;Importin subunit alpha-6
-0.448005	-0.237646	-0.841851	0.303908	2.4294	0.168409	0.0373499	-0.788757	-0.622804		5	5	5	NaN	NaN	NaN	NaN	0	NaN	659290000	38	477	54290	19	0	P84039	P84039	Ectonucleotide pyrophosphatase/phosphodiesterase family member 5	Enpp5	Enpp5	Ectonucleotide pyrophosphatase/phosphodiesterase family member 5
-0.153662	-0.719669	0.363273	1.70512	-0.731072	1.49177	-0.153521	-0.977235	-0.82501		9	6	5	NaN	NaN	NaN	NaN	0	NaN	9475500000	195	193	22427.4	15	0	P84076	P84076	Neuron-specific calcium-binding protein hippocalcin	Hpca	Hpca	Neuron-specific calcium-binding protein hippocalcin
-0.164476	0.583596	1.42491	NaN	0.586382	-1.51718	-1.32362	-0.0398771	0.450273		8	3	2	55	NaN	NaN	NaN	0	NaN	1940000000	32	180	20529.7	11	0	P84083	P84083	ADP-ribosylation factor 5	Arf5	Arf5	ADP-ribosylation factor 5
0.307903	0.606852	-1.23283	1.35354	NaN	0.943638	0.145801	-0.973883	-1.15101		3	1	1	NaN	NaN	NaN	NaN	0	NaN	357800000	14	134	15394.4	5	0	P84087	P84087	Complexin-2	Cplx2	Cplx2	Complexin-2
0.859523	0.793815	0.761512	-1.198	0.183499	-2.00036	-0.317204	0.631222	0.285997		13	13	13	NaN	NaN	NaN	NaN	0	NaN	13502000000	340	435	49654.7	26	0	P84092	P84092	AP-2 complex subunit mu	Ap2m1	Ap2m1	AP-2 complex subunit mu
0.196277	0.832771	0.363526	0.80172	NaN	-0.37404	0.103944	-2.28329	0.359091		2	2	2	NaN	NaN	NaN	NaN	0	NaN	3305600000	40	152	16994.6	7	0	P84817	P84817	Mitochondrial fission 1 protein	Fis1	Fis1	Mitochondrial fission 1 protein
-0.45372	-0.656688	1.51881	-0.378819	NaN	-0.532559	-1.30487	1.28613	0.521713		5	5	5	11	11	11	NaN	0	NaN	1114300000	23	535	58805	21	0	P84850	P84850	D-2-hydroxyglutarate dehydrogenase, mitochondrial	D2hgdh	D2hgdh	D-2-hydroxyglutarate dehydrogenase, mitochondrial
0.0810909	-0.934368	-1.45169	0.755171	0.020151	0.34558	1.92892	-0.775379	0.0305235		6	6	6	NaN	NaN	NaN	NaN	0	NaN	495450000	22	685	77449.3	30	0	P84903	P84903	Stromal interaction molecule 1	Stim1	Stim1	Stromal interaction molecule 1
-0.299083	-0.0783042	1.52441	-1.2906	-0.463299	-0.911563	-0.171551	1.6852	0.00479161		28	11	3	76	NaN	NaN	NaN	0	NaN	192850000000	1468	445	49907	20	0	P85108	P85108	Tubulin beta-2A chain	Tubb2a	Tubb2a	Tubulin beta-2A chain
-0.109384	-0.276878	-0.794978	1.71341	-0.791918	1.46376	-0.916082	-0.732701	0.444769		7	7	7	NaN	NaN	NaN	NaN	0	NaN	1629700000	42	392	43908.6	18	0	P85125	P85125	Polymerase I and transcript release factor	Ptrf	Ptrf	Polymerase I and transcript release factor
0.223507	0.86298	0.545538	-1.81257	0.359023	-1.57614	0.0120717	0.849458	0.536136		12	12	12	NaN	NaN	NaN	NaN	0	NaN	18409000000	342	376	42613.7	20	0	P85515	P85515	Alpha-centractin	Actr1a	Actr1a	Alpha-centractin
0.510828	0.794566	1.2901	-1.53099	-0.471267	-1.42112	-0.291576	0.289412	0.830044		16	16	16	42	42	42	NaN	0	NaN	14547000000	336	452	49522.4	30	0	P85834	P85834	Elongation factor Tu, mitochondrial	Tufm	Tufm	Elongation factor Tu, mitochondrial
0.459941	1.59515	0.716025	-0.439142	1.03977	-0.863333	-1.35783	-0.25412	-0.896463		16	16	16	NaN	NaN	NaN	NaN	0	NaN	18052000000	326	493	54491	29	0	P85845	P85845	Fascin	Fscn1	Fscn1	Fascin
0.434467	0.775768	0.104305	-0.901425	1.52766	-1.26625	-1.32429	0.816819	-0.167052		14	14	14	NaN	NaN	NaN	NaN	0	NaN	10831000000	167	483	53236.2	23	0	P85968	P85968	6-phosphogluconate dehydrogenase, decarboxylating	Pgd	Pgd	6-phosphogluconate dehydrogenase, decarboxylating
0.864123	-0.448206	0.283771	-1.50615	1.76127	0.494286	0.107157	-0.518774	-1.03748		16	14	14	NaN	NaN	NaN	NaN	0	NaN	26617000000	431	297	33469.9	19	0	P85969	P85969	Beta-soluble NSF attachment protein	Napb	Napb	Beta-soluble NSF attachment protein
0.814937	-0.373372	0.156282	-0.019539	1.41535	-2.19362	-0.411516	0.315452	0.29603		14	14	14	NaN	NaN	NaN	NaN	0	NaN	10172000000	194	300	34391.1	20	0	P85970	P85970	Actin-related protein 2/3 complex subunit 2	Arpc2	Arpc2	Actin-related protein 2/3 complex subunit 2
0.325792	0.0399242	-0.325536	0.471273	1.22669	1.45799	-1.10771	-0.531416	-1.557		8	8	8	NaN	NaN	NaN	NaN	0	NaN	5884800000	195	257	27234.4	12	0	P85971	P85971	6-phosphogluconolactonase	Pgls	Pgls	6-phosphogluconolactonase
0.182924	-0.705222	-0.611495	0.913581	2.17301	-0.0566316	-0.907759	-0.828084	-0.160327		39	39	39	NaN	NaN	NaN	NaN	0	NaN	18488000000	456	1066	116615	75	0	P85972	P85972	Vinculin	Vcl	Vcl	Vinculin
0.423548	1.05142	0.37507	-0.701414	1.18969	-1.21057	-1.70426	0.544128	0.0323827		16	16	16	NaN	NaN	NaN	NaN	0	NaN	12610000000	337	289	32301.9	16	0	P85973	P85973	Purine nucleoside phosphorylase	Pnp	Pnp	Purine nucleoside phosphorylase
0.810432	0.321448	-0.659291	1.31069	0.6055	0.811107	-0.459477	-1.15031	-1.5901		6	6	6	44	44	44	NaN	0	NaN	1574900000	43	150	16901.2	11	0	P86172	P86172	NmrA-like family domain-containing protein 1	Nmral1	Nmral1	NmrA-like family domain-containing protein 1 (Fragments)
0.553321	0.971691	1.01884	-0.538185	-1.92785	-1.14854	0.405869	0.347874	0.316981		14	14	14	NaN	NaN	NaN	NaN	0	NaN	1590200000	41	627	70854.8	37	0	P86182	P86182	Coiled-coil domain-containing protein 22	Ccdc22	Ccdc22	Coiled-coil domain-containing protein 22
-0.0913837	0.70313	0.795328	0.261027	-2.47225	0.368935	-0.392155	0.251842	0.575526		6	6	6	63	63	63	NaN	0	NaN	6898500000	175	138	15322.2	7	0	P86252	P86252	Transcriptional activator protein Pur-alpha	Pura	Pura	Transcriptional activator protein Pur-alpha (Fragments)
-0.150717	-0.812213	0.739423	-1.44648	-0.274114	-0.768086	-0.0888035	1.19704	1.60395		9	9	9	NaN	NaN	NaN	NaN	0	NaN	2959300000	47	301	33154	18	0	P97521	P97521	Mitochondrial carnitine/acylcarnitine carrier protein	Slc25a20	Slc25a20	Mitochondrial carnitine/acylcarnitine carrier protein
-1.50206	-0.220439	0.471587	0.546362	NaN	0.987768	-1.4928	0.259362	0.950217		13	13	13	NaN	NaN	NaN	NaN	0	NaN	1713400000	36	2820	317083	140	0	P97526	P97526	Neurofibromin	Nf1	Nf1	Neurofibromin
-0.0196443	0.494307	-0.469524	-1.29789	2.29273	-0.23202	-0.566895	0.214351	-0.415415		10	10	10	NaN	NaN	NaN	NaN	0	NaN	5006300000	97	297	32940.2	15	0	P97532	P97532	3-mercaptopyruvate sulfurtransferase	Mpst	Mpst	3-mercaptopyruvate sulfurtransferase
1.00487	0.742651	0.860381	-0.291733	0.994659	-1.22016	-1.75282	-0.222488	-0.11536		34	34	33	NaN	NaN	NaN	NaN	0	NaN	45857000000	777	1230	136362	62	0	P97536	P97536	Cullin-associated NEDD8-dissociated protein 1	Cand1	Cand1	Cullin-associated NEDD8-dissociated protein 1
-0.0369085	-1.59608	1.23394	1.43561	NaN	-0.310182	-0.568486	-0.545716	0.387823		3	3	3	NaN	NaN	NaN	NaN	0	NaN	1010000000	32	312	35318.3	15	0	P97544	P97544	Lipid phosphate phosphohydrolase 3	Ppap2b	Plpp3	Phospholipid phosphatase 3
0.385262	-0.821476	-0.591358	1.6912	-1.04175	1.38122	0.315019	-0.604542	-0.713572		4	4	4	NaN	NaN	NaN	NaN	0	NaN	22784000000	193	393	43931.7	20	0	P97546	P97546	Neuroplastin	Nptn	Nptn	Neuroplastin
0.714198	-0.022949	0.0726364	-0.10079	1.97595	-1.1173	-1.51357	0.119011	-0.12719		15	15	15	NaN	NaN	NaN	NaN	0	NaN	2767100000	118	713	82119.2	41	0	P97571	P97571	Calpain-1 catalytic subunit	Capn1	Capn1	Calpain-1 catalytic subunit
-0.708669	-0.515154	-0.619517	1.10658	NaN	0.293743	1.87434	-0.702924	-0.728396		2	2	2	NaN	NaN	NaN	NaN	NaN	NaN	233370000	11	217	24297	14	0	P97576	P97576	GrpE protein homolog 1, mitochondrial	Grpel1	Grpel1	GrpE protein homolog 1, mitochondrial
1.10099	0.595585	0.73448	-0.368435	NaN	-1.21329	-0.418154	1.01283	-1.444		7	7	7	NaN	NaN	NaN	NaN	0	NaN	620910000	21	329	35718.4	17	0	P97584	P97584	Prostaglandin reductase 1	Ptgr1	Ptgr1	Prostaglandin reductase 1
0.312376	-0.133552	-0.816454	-0.00602127	2.00066	0.73398	-0.29059	-1.59712	-0.203281		11	11	11	NaN	NaN	NaN	NaN	0	NaN	1789000000	59	1288	137720	56	0	P97608	P97608	5-oxoprolinase	Oplah	Oplah	5-oxoprolinase
-0.153801	-0.701824	0.100301	1.95342	-0.334543	NaN	-1.34919	-0.308431	0.794068		4	4	4	NaN	NaN	NaN	NaN	NaN	NaN	657460000	9	421	46608.1	23	0	P97610	P97610	Synaptotagmin-12	Syt12	Syt12	Synaptotagmin-12
0.666155	1.13735	NaN	0.786635	NaN	NaN	-0.503764	-1.37001	-0.71637		4	4	4	NaN	NaN	NaN	NaN	0	NaN	672110000	12	1025	117201	50	0	P97629	P97629	Leucyl-cystinyl aminopeptidase	Lnpep	Lnpep	Leucyl-cystinyl aminopeptidase
-0.0730889	-0.968632	1.095	NaN	NaN	NaN	-0.916927	-0.474733	1.33838		2	2	2	NaN	NaN	NaN	NaN	NaN	NaN	146310000	3	325	37495.2	19	0	P97633	P97633	Casein kinase I isoform alpha	Csnk1a1	Csnk1a1	Casein kinase I isoform alpha
0.897662	0.431313	0.508426	0.893117	-1.58744	1.14907	-0.298477	-1.1296	-0.86406		31	31	31	36	36	36	138	0	NaN	46699000000	808	1240	138004	48	0	P97685	P97685	Neurofascin	Nfasc	Nfasc	Neurofascin
0.278932	-0.204021	-0.748888	1.84182	-0.942243	1.08908	0.366873	-1.23135	-0.45021		17	17	17	NaN	NaN	NaN	NaN	0	NaN	4705900000	170	1214	133912	61	0	P97686	P97686	Neuronal cell adhesion molecule	Nrcam	Nrcam	Neuronal cell adhesion molecule
NaN	NaN	NaN	NaN	NaN	NaN	NaN	-0.707107	0.707107		3	3	3	NaN	NaN	NaN	NaN	NaN	NaN	718980000	3	511	57407.9	18	0	P97687	P97687	Ectonucleoside triphosphate diphosphohydrolase 1	Entpd1	Entpd1	Ectonucleoside triphosphate diphosphohydrolase 1
1.14669	0.747041	0.0997744	1.26918	0.015942	-0.0147741	-1.46809	-1.50537	-0.290392		10	10	10	NaN	NaN	NaN	NaN	0	NaN	12040000000	192	277	30511.3	15	0	P97697	P97697	Inositol monophosphatase 1	Impa1	Impa1	Inositol monophosphatase 1
-0.112686	-0.0475247	0.885271	-1.91123	0.621968	-0.953202	-0.468083	0.815408	1.17008		12	12	12	NaN	NaN	NaN	NaN	0	NaN	12697000000	220	314	34132.9	17	0	P97700	P97700	Mitochondrial 2-oxoglutarate/malate carrier protein	Slc25a11	Slc25a11	Mitochondrial 2-oxoglutarate/malate carrier protein
0.535589	-0.509144	-0.684272	1.64607	-0.845235	1.21385	0.528008	-1.07118	-0.813683		7	7	7	NaN	NaN	NaN	NaN	0	NaN	3479300000	73	509	55690.8	26	0	P97710	P97710	Tyrosine-protein phosphatase non-receptor type substrate 1	Sirpa	Sirpa	Tyrosine-protein phosphatase non-receptor type substrate 1
0.81096	1.26694	0.687781	-1.44059	-0.00115313	-1.60552	0.180286	-0.484861	0.586152		9	9	9	NaN	NaN	NaN	NaN	0	NaN	2638800000	59	505	55907.8	27	0	P97756	P97756	Calcium/calmodulin-dependent protein kinase kinase 1	Camkk1	Camkk1	Calcium/calmodulin-dependent protein kinase kinase 1
0.843614	-1.01618	-1.02352	0.756866	-0.0281807	1.64599	0.555633	-1.10447	-0.62975		4	4	4	NaN	NaN	NaN	NaN	0	NaN	4023100000	111	303	32995.4	12	0	P97829	P97829	Leukocyte surface antigen CD47	Cd47	Cd47	Leukocyte surface antigen CD47
0.862845	0.803316	-0.127625	-1.04019	1.21414	-0.0815043	-1.88926	0.591981	-0.333699		11	11	11	NaN	NaN	NaN	NaN	0	NaN	5888400000	143	471	53428.1	18	0	P97834	P97834	COP9 signalosome complex subunit 1	Gps1	Gps1	COP9 signalosome complex subunit 1
-0.957139	-0.949481	0.887222	-0.972144	0.372979	1.31428	-0.945802	-0.0486798	1.29876		34	34	34	NaN	NaN	NaN	NaN	0	NaN	12381000000	334	1381	155868	64	0	P97846	P97846	Contactin-associated protein 1	Cntnap1	Cntnap1	Contactin-associated protein 1
-0.143826	0.469129	0.95998	-1.52099	NaN	-1.35464	-0.15937	0.616923	1.13279		8	8	8	NaN	NaN	NaN	NaN	0	NaN	1279500000	31	646	71283	30	0	P97849	P97849	Long-chain fatty acid transport protein 1	Slc27a1	Slc27a1	Long-chain fatty acid transport protein 1
0.171618	-0.496443	-0.262679	-1.25501	0.955058	-1.60637	0.479337	1.41259	0.601901		17	17	17	NaN	NaN	NaN	NaN	0	NaN	12831000000	264	735	79427.8	39	0	P97852	P97852	Peroxisomal multifunctional enzyme type 2;(3R)-hydroxyacyl-CoA dehydrogenase;Enoyl-CoA hydratase 2	Hsd17b4	Hsd17b4	Peroxisomal multifunctional enzyme type 2
-0.0815163	-0.299836	1.04328	-1.47548	1.05035	-1.48029	0.88714	-0.3183	0.674649		4	4	4	NaN	NaN	NaN	NaN	NaN	NaN	358400000	15	1305	143703	60	0	P97874	P97874	Cyclin-G-associated kinase	Gak	Gak	Cyclin-G-associated kinase
-0.00403441	-0.0301518	0.227507	-2.43989	0.706688	-0.326518	0.841875	0.234162	0.790359		4	4	4	NaN	NaN	NaN	NaN	0	NaN	617600000	17	708	81736.8	41	0	P97878	P97878	Exocyst complex component 5	Exoc5	Exoc5	Exocyst complex component 5
-0.707107	NaN	0.707107	NaN	NaN	NaN	NaN	NaN	NaN		2	2	2	1	1	1	NaN	NaN	NaN	466520000	6	2959	336587	149	0	P97924	P97924	Kalirin	Kalrn	Kalrn	Kalirin
-0.237366	0.313388	0.652486	-1.37051	-0.103817	-1.79435	1.03562	0.983135	0.521419		5	5	5	NaN	NaN	NaN	NaN	0	NaN	539350000	35	555	59353.6	21	0	Q00438;Q9Z118	Q00438	Polypyrimidine tract-binding protein 1	Ptbp1	Ptbp1	Polypyrimidine tract-binding protein 1
-0.917151	1.85243	-0.190325	1.37105	-0.549493	-0.85019	-0.00770985	-0.871734	0.16313		12	12	12	NaN	NaN	NaN	NaN	0	NaN	2941600000	25	2326	251909	81	0	Q00657	Q00657	Chondroitin sulfate proteoglycan 4	Cspg4	Cspg4	Chondroitin sulfate proteoglycan 4
-1.34774	-1.47088	-0.0513292	0.546061	-0.153216	1.51724	-0.0325419	1.16714	-0.174743		4	4	4	NaN	NaN	NaN	NaN	0	NaN	11697000000	85	125	13990.2	6	0	Q00715;Q00729	Q00715	Histone H2B type 1			Histone H2B type 1
NaN	NaN	NaN	-0.707107	NaN	NaN	0.707107	NaN	NaN		2	2	2	NaN	NaN	NaN	NaN	0	NaN	200410000	9	218	24692.1	10	0	Q00954	Q00954	Sodium channel subunit beta-1	Scn1b	Scn1b	Sodium channel subunit beta-1
0.192755	-0.441186	-0.837643	1.63551	0.169398	1.57102	-0.523437	-0.708907	-1.05751		10	10	10	NaN	NaN	NaN	NaN	0	NaN	151250000000	760	223	24838.3	10	0	Q00981	Q00981	Ubiquitin carboxyl-terminal hydrolase isozyme L1	Uchl1	Uchl1	Ubiquitin carboxyl-terminal hydrolase isozyme L1
1.02855	0.594663	0.158699	1.30621	-0.508273	-0.235258	-2.12487	-0.0641437	-0.155584		9	9	9	NaN	NaN	NaN	NaN	0	NaN	999380000	51	535	61259.6	27	0	Q01066	Q01066	Calcium/calmodulin-dependent 3,5-cyclic nucleotide phosphodiesterase 1B	Pde1b	Pde1b	Calcium/calmodulin-dependent 3',5'-cyclic nucleotide phosphodiesterase 1B
NaN	NaN	NaN	NaN	NaN	0.59482	NaN	-1.15452	0.559703		6	6	6	NaN	NaN	NaN	NaN	0	NaN	381320000	9	354	39805.1	20	0	Q01129	Q01129	Decorin	Dcn	Dcn	Decorin
-1.25853	-1.01993	-0.786761	-0.400589	1.68126	0.595267	-0.296385	1.07746	0.408221		27	27	27	NaN	NaN	NaN	NaN	0	NaN	12449000000	241	812	90535.7	46	0	Q01177;CON__P06868	Q01177	Plasminogen;Plasmin heavy chain A;Activation peptide;Angiostatin;Plasmin heavy chain A, short form;Plasmin light chain B	Plg	Plg	Plasminogen
-1.50411	-1.20002	0.349675	-0.241153	1.45368	-0.141673	-0.52796	1.0851	0.726453		12	12	12	NaN	NaN	NaN	NaN	0	NaN	15433000000	230	454	48925.4	23	0	Q01205	Q01205	Dihydrolipoyllysine-residue succinyltransferase component of 2-oxoglutarate dehydrogenase complex, mitochondrial	Dlst	Dlst	Dihydrolipoyllysine-residue succinyltransferase component of 2-oxoglutarate dehydrogenase complex, mitochondrial
-0.41793	-0.353353	0.129222	0.103829	-0.623092	2.45529	-0.304342	-1.07533	0.0857052		8	8	8	11	11	11	NaN	0	NaN	928200000	25	971	108185	35	0	Q01728	Q01728	Sodium/calcium exchanger 1	Slc8a1	Slc8a1	Sodium/calcium exchanger 1
-0.313504	-1.26684	0.297145	1.02026	0.864158	0.962026	-1.81458	0.418112	-0.166775		7	7	6	NaN	NaN	NaN	NaN	0	NaN	5400900000	105	889	94393.4	28	0	Q01956	Q01956	Potassium voltage-gated channel subfamily C member 3	Kcnc3	Kcnc3	Potassium voltage-gated channel subfamily C member 3
1.81043	1.18671	0.43649	-0.0797064	-0.976093	-1.00619	-0.621976	-0.866841	0.117169		12	12	9	NaN	NaN	NaN	NaN	0	NaN	5202000000	106	393	43465	19	0	Q01986	Q01986	Dual specificity mitogen-activated protein kinase kinase 1	Map2k1	Map2k1	Dual specificity mitogen-activated protein kinase kinase 1
0.647994	0.927852	0.826941	0.570198	-2.12416	-0.835122	-0.546898	0.439115	0.0940756		22	22	22	NaN	NaN	NaN	NaN	0	NaN	19945000000	363	535	57807.6	29	0	Q02253	Q02253	Methylmalonate-semialdehyde dehydrogenase [acylating], mitochondrial	Aldh6a1	Aldh6a1	Methylmalonate-semialdehyde dehydrogenase [acylating], mitochondrial
-1.97135	-0.12203	-0.310496	NaN	-0.294109	0.791181	-0.00215842	0.470766	1.43819		6	6	6	NaN	NaN	NaN	NaN	0	NaN	1858300000	50	437	48673.5	13	0	Q02293	Q02293	Protein farnesyltransferase subunit beta	Fntb	Fntb	Protein farnesyltransferase subunit beta
0.315747	0.735959	1.7417	-1.63957	0.131299	-1.03021	-0.589431	-0.111133	0.445646		12	12	12	NaN	NaN	NaN	NaN	0	NaN	2867400000	101	824	94787.1	38	0	Q02356	Q02356	AMP deaminase 2	Ampd2	Ampd2	AMP deaminase 2
-0.915212	-0.0143678	1.89132	-0.446223	-0.894591	-0.358093	-0.982901	0.937625	0.782443		6	6	6	NaN	NaN	NaN	NaN	0	NaN	8097400000	125	742	82661.3	26	0	Q02563	Q02563	Synaptic vesicle glycoprotein 2A	Sv2a	Sv2a	Synaptic vesicle glycoprotein 2A
0.290924	0.381524	0.270035	-0.248078	NaN	NaN	1.67783	-1.24309	-1.12914		4	4	4	NaN	NaN	NaN	NaN	0	NaN	579980000	24	362	39961.1	17	0	Q02589	Q02589	[Protein ADP-ribosylarginine] hydrolase	Adprh	Adprh	[Protein ADP-ribosylarginine] hydrolase
-0.762407	-1.08999	-0.699152	NaN	NaN	NaN	0.404989	1.44338	0.703182		7	7	7	NaN	NaN	NaN	NaN	0	NaN	1046000000	43	416	48106.4	22	0	Q02769	Q02769	Squalene synthase	Fdft1	Fdft1	Squalene synthase
0.946417	0.995655	-1.36886	NaN	NaN	NaN	-0.0930919	NaN	-0.480116		2	2	2	NaN	NaN	NaN	NaN	0	NaN	257750000	24	298	32749.3	16	0	Q02974	Q02974	Ketohexokinase	Khk	Khk	Ketohexokinase
0.333899	0.581487	1.42794	-1.76774	-0.217894	-1.3276	-0.0457478	0.336615	0.67903		11	11	10	NaN	NaN	NaN	NaN	0	NaN	6427400000	120	292	33254.5	19	0	Q03114	Q03114	Cyclin-dependent-like kinase 5	Cdk5	Cdk5	Cyclin-dependent-like kinase 5
-0.238745	0.682091	0.791563	-2.37586	-0.0879065	0.179278	-0.271304	0.328294	0.992588		8	8	8	NaN	NaN	NaN	NaN	0	NaN	1409800000	51	489	54265.2	24	0	Q03346	Q03346	Mitochondrial-processing peptidase subunit beta	Pmpcb	Pmpcb	Mitochondrial-processing peptidase subunit beta
0.720113	0.763644	0.444547	1.19549	-0.951075	-1.8131	-0.130762	-0.834264	0.605401		9	9	9	NaN	NaN	NaN	NaN	0	NaN	1958900000	53	796	90260.5	35	0	Q03348	Q03348	Receptor-type tyrosine-protein phosphatase alpha	Ptpra	Ptpra	Receptor-type tyrosine-protein phosphatase alpha
-0.182902	0.039746	-0.163019	1.55138	-1.86764	0.638888	0.601391	-1.04473	0.426891		18	18	18	NaN	NaN	NaN	NaN	0	NaN	6977900000	170	768	83265.5	39	0	Q03555	Q03555	Gephyrin;Molybdopterin adenylyltransferase;Molybdopterin molybdenumtransferase	Gphn	Gphn	Gephyrin
-0.949524	-1.12469	-1.20857	0.42347	1.59449	1.06686	-0.227298	0.643239	-0.21797		40	40	12	NaN	NaN	NaN	NaN	0	NaN	140840000000	1520	1487	165326	60	0	Q03626	Q03626	Murinoglobulin-1	Mug1	Mug1	Murinoglobulin-1
0.363347	0.815533	0.988171	-0.961394	-1.4085	-1.35743	-0.10369	0.631361	1.0326		25	25	25	NaN	NaN	NaN	NaN	0	NaN	7292100000	272	1264	140368	59	0	Q04462	Q04462	Valine--tRNA ligase	Vars	Vars	Valine--tRNA ligase
-1.05129	-0.482299	-1.09713	-1.00796	1.7262	1.05511	0.148144	0.159621	0.549607		9	9	9	NaN	NaN	NaN	NaN	0	NaN	2871300000	99	377	44049.3	16	0	Q04631	Q04631	Protein farnesyltransferase/geranylgeranyltransferase type-1 subunit alpha	Fnta	Fnta	Protein farnesyltransferase/geranylgeranyltransferase type-1 subunit alpha
-0.392659	-0.887961	-0.581061	1.70446	-0.603153	-0.517948	1.75219	-0.23191	-0.241948		9	2	1	46	NaN	NaN	NaN	0	NaN	1337100000	53	189	21243.2	10	0	Q04970	Q04970	GTPase NRas	Nras	Nras	GTPase NRas
1.8154	0.719132	0.554744	0.377917	-1.63176	-0.24599	-0.854002	-0.450418	-0.285023		9	9	7	NaN	NaN	NaN	NaN	0	NaN	17619000000	287	915	93519.1	27	0	Q05140	Q05140	Clathrin coat assembly protein AP180	Snap91	Snap91	Clathrin coat assembly protein AP180
-0.156498	-0.654276	-0.885234	1.73208	-0.0586162	1.51127	0.189858	-0.964689	-0.713895		9	9	9	NaN	NaN	NaN	NaN	0	NaN	16252000000	253	220	21790.3	10	0	Q05175	Q05175	Brain acid soluble protein 1	Basp1	Basp1	Brain acid soluble protein 1
-0.600558	-0.375755	0.338619	1.32823	-0.393927	1.896	-1.15155	-0.494749	-0.546314		28	28	28	NaN	NaN	NaN	NaN	0	NaN	57318000000	867	1356	149371	59	0	Q05546	Q05546	Tenascin-R	Tnr	Tnr	Tenascin-R
-0.167713	-0.0176932	0.480046	-2.33227	1.00313	-0.487035	0.0908204	0.830308	0.600407		6	6	6	NaN	NaN	NaN	NaN	0	NaN	1178700000	47	585	65402.3	26	0	Q05683	Q05683	Glutamate decarboxylase 2	Gad2	Gad2	Glutamate decarboxylase 2
-0.446566	-0.794785	-0.310648	1.46631	0.342032	1.64002	0.137898	-0.899735	-1.13452		17	17	17	NaN	NaN	NaN	NaN	0	NaN	7163600000	241	1259	140935	56	0	Q05695	Q05695	Neural cell adhesion molecule L1	L1cam	L1cam	Neural cell adhesion molecule L1
0.368575	-0.572617	0.793338	-0.806726	2.22449	-0.746438	-0.67252	-0.0437282	-0.544375		16	15	15	NaN	NaN	NaN	NaN	0	NaN	9688900000	216	725	80592.7	35	0	Q05764	Q05764	Beta-adducin	Add2	Add2	Beta-adducin
-0.18825	0.0787363	0.785732	-1.95287	0.263001	-1.01795	-0.157056	1.06175	1.12691		18	18	10	52	52	NaN	NaN	0	NaN	94130000000	879	298	32989.4	20	0	Q05962	Q05962	ADP/ATP translocase 1	Slc25a4	Slc25a4	ADP/ATP translocase 1
1.64711	-0.65266	0.16229	1.0579	0.14956	-0.617545	-1.48392	-0.864615	0.601886		11	11	5	NaN	NaN	NaN	NaN	0	NaN	57032000000	483	152	17192.7	10	0	Q05982	Q05982	Nucleoside diphosphate kinase A	Nme1	Nme1	Nucleoside diphosphate kinase A
1.47331	0.0316652	-1.02599	1.24832	NaN	NaN	-0.551022	-0.921265	-0.25502		3	3	3	NaN	NaN	NaN	NaN	0	NaN	412750000	6	415	47316.1	23	0	Q06486	Q06486	Casein kinase I isoform delta	Csnk1d	Csnk1d	Casein kinase I isoform delta
0.729357	0.780338	1.22952	-0.675991	-1.45985	-1.08765	0.204768	-0.724907	1.00442		9	9	9	NaN	NaN	NaN	NaN	0	NaN	29898000000	251	213	23397.6	12	0	Q06647	Q06647	ATP synthase subunit O, mitochondrial	Atp5o	Atp5o	ATP synthase subunit O, mitochondrial
-0.987383	0.0449341	0.907928	-0.413341	1.02609	-0.313666	-1.88538	0.745413	0.875406		23	23	23	NaN	NaN	NaN	NaN	0	NaN	18310000000	426	700	79919.3	34	0	Q07009	Q07009	Calpain-2 catalytic subunit	Capn2	Capn2	Calpain-2 catalytic subunit
-0.220817	NaN	NaN	1.34908	NaN	-1.25475	NaN	-0.460596	0.587083		3	3	3	NaN	NaN	NaN	NaN	0	NaN	332420000	10	546	60805.9	29	0	Q07116	Q07116	Sulfite oxidase, mitochondrial	Suox	Suox	Sulfite oxidase, mitochondrial
0.884492	-0.673007	0.613036	1.07756	0.146699	-0.908093	0.888682	-1.8901	-0.139265		10	10	10	27	27	27	NaN	0	NaN	3479300000	95	429	48954.4	22	0	Q07205	Q07205	Eukaryotic translation initiation factor 5	Eif5	Eif5	Eukaryotic translation initiation factor 5
-0.132692	-1.18576	-0.184606	1.6199	NaN	0.717434	-0.097355	-1.39863	0.661714		7	7	7	NaN	NaN	NaN	NaN	0	NaN	1546700000	66	707	77472	32	0	Q07266	Q07266	Drebrin	Dbn1	Dbn1	Drebrin
0.254164	-0.441125	1.1322	-1.09188	NaN	-0.0934345	-1.40553	0.141461	1.50415		10	10	9	NaN	NaN	NaN	NaN	0	NaN	1028300000	29	1578	173994	74	0	Q07310	Q07310	Neurexin-3	Nrxn3	Nrxn3	Neurexin-3
0.270145	-0.876523	0.11544	0.364693	2.37786	-0.503313	-0.493997	-0.434597	-0.819713		7	7	7	NaN	NaN	NaN	NaN	0	NaN	2141400000	76	493	53580.9	11	0	Q07647	Q07647	Solute carrier family 2, facilitated glucose transporter member 3	Slc2a3	Slc2a3	Solute carrier family 2, facilitated glucose transporter member 3
-0.0734994	1.01377	1.08288	-1.13717	NaN	-1.25506	-0.918474	0.287806	0.99974		12	12	12	22	22	22	NaN	0	NaN	1592800000	78	751	83457.3	40	0	Q07803	Q07803	Elongation factor G, mitochondrial	Gfm1	Gfm1	Elongation factor G, mitochondrial
-0.783728	-1.06228	0.265131	1.12339	1.61429	-0.410986	-1.38111	0.174548	0.460742		19	19	19	NaN	NaN	NaN	NaN	0	NaN	26460000000	556	339	38678.2	23	0	Q07936	Q07936	Annexin A2	Anxa2	Anxa2	Annexin A2
-1.97723	0.184308	-0.00595228	-0.584839	-0.422784	0.180034	0.174213	0.743287	1.70896		4	4	4	NaN	NaN	NaN	NaN	0	NaN	684680000	35	173	18979.6	6	0	Q07984	Q07984	Translocon-associated protein subunit delta	Ssr4	Ssr4	Translocon-associated protein subunit delta
1.54006	0.965495	0.254628	0.174192	-1.45723	-1.54598	0.127059	-0.215447	0.15722		11	11	11	NaN	NaN	NaN	NaN	0	NaN	23595000000	358	474	51588.9	27	0	Q08163	Q08163	Adenylyl cyclase-associated protein 1	Cap1	Cap1	Adenylyl cyclase-associated protein 1
0.404996	-0.531146	0.322786	0.502056	NaN	0.295884	1.30888	-2.08552	-0.217937		5	5	5	21	21	21	NaN	0	NaN	737380000	24	372	40822.4	17	0	Q08406	Q08406	Ciliary neurotrophic factor receptor subunit alpha	Cntfr	Cntfr	Ciliary neurotrophic factor receptor subunit alpha
0.0744691	1.25455	1.40525	-0.842608	NaN	-1.32513	-0.922169	-0.00414891	0.35979		10	10	10	NaN	NaN	NaN	NaN	0	NaN	2012100000	48	457	51652.5	19	0	Q08415	Q08415	Kynurenine--oxoglutarate transaminase 1, mitochondrial	Ccbl1	Kyat1	Kynurenine--oxoglutarate transaminase 1, mitochondrial
-0.15294	0.914856	1.03261	-0.911094	0.703106	-1.30184	-1.47873	0.318976	0.875056		18	18	18	NaN	NaN	NaN	NaN	0	NaN	4590200000	103	567	64904.3	40	0	Q08602	Q08602	Geranylgeranyl transferase type-2 subunit alpha	Rabggta	Rabggta	Geranylgeranyl transferase type-2 subunit alpha
0.64762	0.88303	0.703611	-0.622897	NaN	NaN	-0.565496	-1.75806	0.712192		3	3	3	NaN	NaN	NaN	NaN	NaN	NaN	666750000	15	331	36856.3	16	0	Q08603	Q08603	Geranylgeranyl transferase type-2 subunit beta	Rabggtb	Rabggtb	Geranylgeranyl transferase type-2 subunit beta
0.00142846	-0.186715	-0.722619	1.89416	NaN	0.125465	0.888218	-1.15895	-0.840995		4	4	4	NaN	NaN	NaN	NaN	0	NaN	1201700000	36	298	34209	15	0	Q08850	Q08850	Syntaxin-4	Stx4	Stx4	Syntaxin-4
0.381398	0.801298	0.929213	-1.46672	1.03338	-1.52131	-0.785919	0.303577	0.325082		29	25	20	NaN	NaN	NaN	NaN	0	NaN	11627000000	403	869	97914.2	50	0	Q08877	Q08877	Dynamin-3	Dnm3	Dnm3	Dynamin-3
-0.24943	-0.340968	1.05586	-1.62379	0.436155	-1.08279	-0.419348	1.28198	0.94233		16	8	8	46	NaN	NaN	NaN	0	NaN	38345000000	272	298	32901.3	20	0	Q09073	Q09073	ADP/ATP translocase 2;ADP/ATP translocase 2, N-terminally processed	Slc25a5	Slc25a5	ADP/ATP translocase 2
0.267119	-0.0908722	-0.672847	-1.43747	0.153414	-1.37688	0.85598	1.37521	0.92634		10	10	10	20	20	20	NaN	0	NaN	6295000000	206	541	61126	26	0	Q09426	Q09426	2-hydroxyacylsphingosine 1-beta-galactosyltransferase	Ugt8	Ugt8	2-hydroxyacylsphingosine 1-beta-galactosyltransferase
0.605198	-0.104501	0.789491	-2.36893	0.847088	-0.327997	-0.0738271	0.73892	-0.105447		7	7	7	NaN	NaN	NaN	NaN	0	NaN	1370200000	32	314	35810.8	19	0	Q0VGK4	Q0VGK4	Glycerophosphodiester phosphodiesterase domain-containing protein 1	Gdpd1	Gdpd1	Glycerophosphodiester phosphodiesterase domain-containing protein 1
-0.430052	-0.87083	0.377215	0.951547	-0.552385	1.86112	0.370521	-1.42174	-0.285401		7	7	7	NaN	NaN	NaN	NaN	0	NaN	3031800000	115	211	23623	13	0	Q0ZCA7	Q0ZCA7	C-type lectin domain family 2 member L	Clec2l	Clec2l	C-type lectin domain family 2 member L
-1.20471	-0.0858888	-0.716762	-0.721146	-0.132429	-0.872425	1.37173	1.00976	1.35187		6	5	5	NaN	NaN	NaN	NaN	0	NaN	484900000	24	541	60586	24	0	Q0ZHH6	Q0ZHH6	Atlastin-3	Atl3	Atl3	Atlastin-3
-0.299555	-1.00519	0.258203	1.38404	-0.107338	1.35203	-0.0611931	-1.7397	0.218701		6	6	6	NaN	NaN	NaN	NaN	0	NaN	748480000	30	544	60444.8	30	0	Q10743	Q10743	Disintegrin and metalloproteinase domain-containing protein 10	Adam10	Adam10	Disintegrin and metalloproteinase domain-containing protein 10
0.857189	1.1226	0.098596	0.237053	0.679012	-2.03398	-0.195822	-1.09305	0.328397		7	7	7	NaN	NaN	NaN	NaN	0	NaN	722330000	38	1144	127088	60	0	Q1AAU6	Q1AAU6	Arf-GAP with SH3 domain, ANK repeat and PH domain-containing protein 1	Asap1	Asap1	Arf-GAP with SH3 domain, ANK repeat and PH domain-containing protein 1
0.073132	0.00456841	2.35844	0.154058	-1.31383	-0.511714	-0.539156	-0.341392	0.115895		8	8	8	NaN	NaN	NaN	NaN	0	NaN	1456800000	30	425	48116.3	24	0	Q1HCL7	Q1HCL7	NAD kinase 2, mitochondrial	Nadk2	Nadk2	NAD kinase 2, mitochondrial
-0.115041	0.613133	0.463411	-1.50331	-0.628427	-1.47569	0.506855	0.972447	1.16662		19	19	19	NaN	NaN	NaN	NaN	0	NaN	3020200000	107	1354	163196	58	0	Q1JU68	Q1JU68	Eukaryotic translation initiation factor 3 subunit A	Eif3a	Eif3a	Eukaryotic translation initiation factor 3 subunit A
NaN	-0.204002	-0.959747	NaN	NaN	NaN	NaN	1.40653	-0.24278		2	2	2	NaN	NaN	NaN	NaN	0	NaN	341690000	8	372	42117.2	13	0	Q1M168	Q1M168	Caytaxin	Atcay	Atcay	Caytaxin
0.189333	-0.353625	-0.520166	1.81445	-1.18802	1.20224	0.309598	-1.0922	-0.361617		10	10	10	42	42	42	NaN	0	NaN	30742000000	348	388	42781.4	14	0	Q1WIM1	Q1WIM1	Cell adhesion molecule 4	Cadm4	Cadm4	Cell adhesion molecule 4
-0.0764578	-0.725577	-0.874312	1.67506	0.233843	1.41042	0.165579	-1.21303	-0.595522		7	7	7	NaN	NaN	NaN	NaN	0	NaN	4780800000	108	435	47527.9	13	0	Q1WIM2	Q1WIM2	Cell adhesion molecule 2	Cadm2	Cadm2	Cell adhesion molecule 2
-0.0595632	-0.379187	-0.750537	1.51824	0.408526	1.60197	-0.252159	-0.976058	-1.11123		10	10	10	NaN	NaN	NaN	NaN	0	NaN	29014000000	365	396	42906.2	17	0	Q1WIM3	Q1WIM3	Cell adhesion molecule 3	Cadm3	Cadm3	Cell adhesion molecule 3
NaN	NaN	-0.958497	NaN	NaN	NaN	-0.756854	0.721223	0.994129		2	2	2	24	24	24	NaN	0	NaN	250160000	7	146	17163.6	10	0	Q27W02	Q27W02	Protein mago nashi homolog	Magoh	Magoh	Protein mago nashi homolog
1.17377	-1.47741	-0.0666786	NaN	NaN	NaN	0.639763	-0.838096	0.568656		2	2	2	NaN	NaN	NaN	NaN	NaN	NaN	320850000	20	145	16881.6	10	0	Q2KMM2	Q2KMM2	Trafficking protein particle complex subunit 1	Trappc1	Trappc1	Trafficking protein particle complex subunit 1
0.531473	-0.367542	-0.568479	-1.17099	NaN	-1.36393	0.705983	0.984239	1.24925		4	4	4	NaN	NaN	NaN	NaN	0	NaN	605370000	37	372	42673	22	0	Q2LAM0	Q2LAM0	Fatty acid 2-hydroxylase	Fa2h	Fa2h	Fatty acid 2-hydroxylase
0.957185	-0.224559	-0.588753	-0.704372	0.00704031	0.215536	2.12764	-0.806318	-0.983403		28	28	23	NaN	NaN	NaN	NaN	0	NaN	11955000000	400	963	109531	60	0	Q2PQA9	Q2PQA9	Kinesin-1 heavy chain	Kif5b	Kif5b	Kinesin-1 heavy chain
-0.526235	0.229368	0.868724	-2.05404	0.760539	-0.948277	0.15449	0.910897	0.604532		28	28	28	NaN	NaN	NaN	NaN	0	NaN	14296000000	417	960	111307	54	0	Q2TA68	Q2TA68	Dynamin-like 120 kDa protein, mitochondrial;Dynamin-like 120 kDa protein, form S1	Opa1	Opa1	Dynamin-like 120 kDa protein, mitochondrial
-0.76648	0.167095	1.13036	-1.02918	0.248488	-0.97129	-1.12744	1.09122	1.25723		30	30	30	NaN	NaN	NaN	NaN	0	NaN	2963400000	99	5194	573792	237	0	Q2TL32	Q2TL32	E3 ubiquitin-protein ligase UBR4	Ubr4	Ubr4	E3 ubiquitin-protein ligase UBR4
-1.14622	1.10777	0.287244	-0.745379	NaN	-1.46897	0.454522	0.358759	1.15228		4	4	4	NaN	NaN	NaN	NaN	0	NaN	1229300000	50	320	35442.8	16	0	Q32PX2	Q32PX2	Aminoacyl tRNA synthase complex-interacting multifunctional protein 2	Aimp2	Aimp2	Aminoacyl tRNA synthase complex-interacting multifunctional protein 2
0.752531	0.807464	0.470324	-0.280528	NaN	-2.28772	-0.03948	0.0888878	0.488524		9	9	9	31	31	31	NaN	0	NaN	3152400000	68	423	48556.9	25	0	Q32Q06	Q32Q06	AP-1 complex subunit mu-1	Ap1m1	Ap1m1	AP-1 complex subunit mu-1
NaN	-0.663645	NaN	NaN	1.15016	NaN	NaN	NaN	-0.486518		5	5	5	NaN	NaN	NaN	NaN	0	NaN	533680000	9	443	49278.1	27	0	Q3B7D0	Q3B7D0	Oxygen-dependent coproporphyrinogen-III oxidase, mitochondrial	Cpox	Cpox	Oxygen-dependent coproporphyrinogen-III oxidase, mitochondrial
0.309903	1.28632	0.822238	-0.0656924	NaN	-1.2302	-0.184599	-1.60511	0.667142		5	5	5	NaN	NaN	NaN	NaN	0	NaN	830330000	30	356	38352.3	14	0	Q3B7D1	Q3B7D1	Ubiquitin-conjugating enzyme E2 Z	Ube2z	Ube2z	Ubiquitin-conjugating enzyme E2 Z
-0.260902	0.223525	0.906355	NaN	NaN	-2.11159	0.249139	0.344851	0.648616		5	5	5	NaN	NaN	NaN	NaN	0	NaN	732440000	42	403	43555.8	18	0	Q3B7U9	Q3B7U9	Peptidyl-prolyl cis-trans isomerase FKBP8	Fkbp8	Fkbp8	Peptidyl-prolyl cis-trans isomerase FKBP8
-0.857302	-0.675812	-0.147013	-0.223677	-1.34278	-0.348307	1.77435	0.96843	0.852115		7	7	7	NaN	NaN	NaN	NaN	0	NaN	5780500000	177	326	36988.3	16	0	Q3B8Q0	Q3B8Q0	Microtubule-associated protein RP/EB family member 2	Mapre2	Mapre2	Microtubule-associated protein RP/EB family member 2
-0.582476	-0.324943	0.603081	-0.0307904	-1.99434	0.0676898	-0.231319	1.40027	1.09282		7	5	5	NaN	NaN	NaN	NaN	0	NaN	790100000	43	411	46841	23	0	Q3B8Q2	Q3B8Q2	Eukaryotic initiation factor 4A-III;Eukaryotic initiation factor 4A-III, N-terminally processed	Eif4a3	Eif4a3	Eukaryotic initiation factor 4A-III
-1.00075	-0.592986	0.928599	-1.28134	0.911961	1.48941	0.173222	0.343762	-0.971876		24	24	24	NaN	NaN	NaN	NaN	0	NaN	30877000000	680	609	67176.8	34	0	Q3KR86	Q3KR86	MICOS complex subunit Mic60	Immt	Immt	MICOS complex subunit Mic60
1.01966	1.06615	0.706162	0.315886	-1.59484	-1.39978	-0.0981841	-0.604398	0.589349		9	9	9	NaN	NaN	NaN	NaN	0	NaN	1425200000	125	309	34461.2	19	0	Q3KRD5	Q3KRD5	Mitochondrial import receptor subunit TOM34	Tomm34	Tomm34	Mitochondrial import receptor subunit TOM34
0.564631	-0.906949	1.33393	-0.91731	NaN	1.34192	0.240689	-0.885346	-0.77156		4	4	4	NaN	NaN	NaN	NaN	0	NaN	1138200000	13	245	26571.1	9	0	Q3KRD8	Q3KRD8	Eukaryotic translation initiation factor 6	Eif6	Eif6	Eukaryotic translation initiation factor 6
-0.84473	-0.285816	1.54946	NaN	NaN	-1.44923	-0.137039	0.541769	0.625578		5	5	5	12	12	12	NaN	0	NaN	672970000	20	591	66759	33	0	Q3KRE0	Q3KRE0	ATPase family AAA domain-containing protein 3	Atad3	Atad3	ATPase family AAA domain-containing protein 3
1.67752	0.70628	0.164157	0.248771	-1.40189	-1.0086	0.859984	-0.846257	-0.399961		18	18	18	NaN	NaN	NaN	NaN	0	NaN	55088000000	840	404	43118.7	16	0	Q3MIE4	Q3MIE4	Synaptic vesicle membrane protein VAT-1 homolog	Vat1	Vat1	Synaptic vesicle membrane protein VAT-1 homolog
-0.51427	1.10199	-0.771359	-1.94965	1.14555	-0.349871	0.290226	0.693358	0.354024		4	4	4	NaN	NaN	NaN	NaN	0	NaN	691600000	25	275	32398.2	14	0	Q3MQ06	Q3MQ06	Autophagy protein 5	Atg5	Atg5	Autophagy protein 5
NaN	NaN	NaN	-0.922885	NaN	-0.139566	1.06245	NaN	NaN		5	3	3	14	NaN	NaN	NaN	NaN	NaN	411370000	12	322	35294	16	0	Q3SWU3	Q3SWU3	Heterogeneous nuclear ribonucleoprotein D-like	Hnrnpdl	Hnrnpdl	Heterogeneous nuclear ribonucleoprotein D-like
-0.293011	-0.647216	-1.30948	1.43336	0.535252	1.21835	-0.460727	0.664314	-1.14085		7	7	7	NaN	NaN	NaN	NaN	0	NaN	5079000000	102	154	16832.2	8	0	Q3T1J1	Q3T1J1	Eukaryotic translation initiation factor 5A-1	Eif5a	Eif5a	Eukaryotic translation initiation factor 5A-1
1.01972	0.875505	-0.603089	0.784151	0.441581	-0.673371	-2.12535	0.211499	0.0693536		13	13	11	72	72	NaN	NaN	0	NaN	15504000000	278	286	32967.1	13	0	Q3T1K5	Q3T1K5	F-actin-capping protein subunit alpha-2	Capza2	Capza2	F-actin-capping protein subunit alpha-2
0.481945	0.276813	-0.303106	1.32049	-2.23921	0.295193	0.750594	-0.39428	-0.188437		8	8	8	20	20	20	NaN	0	NaN	4383100000	116	555	58623.9	32	0	Q3ZB98	Q3ZB98	Breast carcinoma-amplified sequence 1 homolog	Bcas1	Bcas1	Breast carcinoma-amplified sequence 1 homolog
0.452848	0.658811	-0.0953126	-2.10873	-0.643956	NaN	0.966116	0.745924	0.0243027		5	5	5	NaN	NaN	NaN	NaN	0	NaN	553080000	19	1166	130187	42	0	Q3ZBA0	Q3ZBA0	Tectonin beta-propeller repeat-containing protein 1	Tecpr1	Tecpr1	Tectonin beta-propeller repeat-containing protein 1
0.105174	-0.44232	0.834715	-1.21095	-1.59133	1.08291	-0.487966	0.519226	1.19055		7	7	7	11	11	11	NaN	0	NaN	550570000	37	821	91745.8	36	0	Q496Z0	Q496Z0	Elongator complex protein 2	Elp2	Elp2	Elongator complex protein 2
0.417174	0.517276	-0.567715	0.667572	0.399549	1.74117	-1.4557	-0.891652	-0.827672		11	11	11	NaN	NaN	NaN	NaN	0	NaN	3121400000	125	276	30701	16	0	Q497B0	Q497B0	Omega-amidase NIT2	Nit2	Nit2	Omega-amidase NIT2
0.0874425	NaN	-0.0735705	NaN	NaN	NaN	-1.53768	0.281538	1.24227		3	3	3	24	24	24	NaN	0	NaN	305780000	2	196	22988	8	0	Q498C8	Q498C8	Protein RER1	Rer1	Rer1	Protein RER1
0.434277	-0.890685	-0.595385	1.85443	NaN	0.593861	0.425138	-0.784087	-1.03755		3	3	3	NaN	NaN	NaN	NaN	0	NaN	496440000	11	160	18094.6	10	0	Q498R7	Q498R7	UPF0587 protein C1orf123 homolog			UPF0587 protein C1orf123 homolog
0.412887	0.523549	0.596606	-0.122188	-2.57846	0.0509907	0.0920452	0.502949	0.521618		20	20	20	NaN	NaN	NaN	NaN	0	NaN	11108000000	241	615	67886.5	28	0	Q499N5	Q499N5	Acyl-CoA synthetase family member 2, mitochondrial	Acsf2	Acsf2	Acyl-CoA synthetase family member 2, mitochondrial
-1.66858	0.259111	0.947141	NaN	NaN	NaN	0.80482	-0.693384	0.350888		3	3	3	NaN	NaN	NaN	NaN	0	NaN	263250000	26	466	50779.4	19	0	Q499P8	Q499P8	RUS1 family protein C16orf58 homolog			RUS1 family protein C16orf58 homolog
NaN	NaN	NaN	0.707107	NaN	NaN	NaN	-0.707107	NaN		2	2	2	NaN	NaN	NaN	NaN	0	NaN	580710000	2	651	70340.7	24	0	Q4AE70	Q4AE70	Histone-arginine methyltransferase CARM1	Carm1	Carm1	Histone-arginine methyltransferase CARM1
-0.963034	0.293884	0.463669	-1.21788	NaN	-0.643778	-0.549375	1.03566	1.58086		9	9	7	NaN	NaN	NaN	NaN	0	NaN	862670000	21	874	97613.9	48	0	Q4AEF8	Q4AEF8	Coatomer subunit gamma-1	Copg1	Copg1	Coatomer subunit gamma-1
-1.84263	-0.244452	-0.495167	-1.07731	1.16198	0.503135	0.849349	0.290763	0.854333		6	6	6	NaN	NaN	NaN	NaN	0	NaN	2425600000	71	353	38414	18	0	Q4FZT0	Q4FZT0	Stomatin-like protein 2, mitochondrial	Stoml2	Stoml2	Stomatin-like protein 2, mitochondrial
0.693761	1.30128	0.124236	-0.480071	1.50372	-0.11061	-1.36899	-0.987564	-0.675759		14	14	14	44	44	44	NaN	0	NaN	4342900000	130	386	42316.4	17	0	Q4FZT2	Q4FZT2	Protein phosphatase methylesterase 1	Ppme1	Ppme1	Protein phosphatase methylesterase 1
0.140041	-0.0303321	0.210893	-0.916052	1.76778	-1.92545	0.0288639	0.348981	0.375278		22	22	22	NaN	NaN	NaN	NaN	0	NaN	9110400000	271	908	100188	49	0	Q4FZT9	Q4FZT9	26S proteasome non-ATPase regulatory subunit 2	Psmd2	Psmd2	26S proteasome non-ATPase regulatory subunit 2
-0.47411	-0.876997	-1.345	0.0023036	NaN	NaN	1.61643	0.582533	0.494849		6	6	6	NaN	NaN	NaN	NaN	0	NaN	652040000	23	269	29569	16	0	Q4FZX7	Q4FZX7	Signal recognition particle receptor subunit beta	Srprb	Srprb	Signal recognition particle receptor subunit beta
0.159937	0.502673	-0.055678	0.84638	NaN	NaN	-1.62634	1.16872	-0.995692		4	4	4	NaN	NaN	NaN	NaN	NaN	NaN	358650000	15	239	26759.2	11	0	Q4FZY0	Q4FZY0	EF-hand domain-containing protein D2	Efhd2	Efhd2	EF-hand domain-containing protein D2
NaN	NaN	-0.814947	NaN	NaN	NaN	NaN	-0.300973	1.11592		2	2	2	NaN	NaN	NaN	NaN	0	NaN	106000000	7	404	45958.3	22	0	Q4G008	Q4G008	Uncharacterized protein KIAA0930 homolog			Uncharacterized protein KIAA0930 homolog
0.61167	0.389763	1.88647	-1.33634	-0.809189	0.334123	-1.11031	-0.237641	0.27146		3	3	3	NaN	NaN	NaN	NaN	0	NaN	974830000	40	182	20550.2	10	0	Q4G009	Q4G009	Malignant T-cell-amplified sequence 1	Mcts1	Mcts1	Malignant T-cell-amplified sequence 1
0.884818	0.729697	0.352679	1.16171	-0.197888	-0.793093	0.677705	-1.16353	-1.6521		6	6	6	NaN	NaN	NaN	NaN	0	NaN	3141500000	60	1502	166503	64	0	Q4G017	Q4G017	Nischarin	Nisch	Nisch	Nischarin
0.0626241	-0.680899	-1.66062	-0.962507	1.32548	-0.0234076	-0.00252521	0.650379	1.29148		17	17	17	NaN	NaN	NaN	NaN	0	NaN	141840000000	130	797	90910.8	38	0	Q4G061	Q4G061	Eukaryotic translation initiation factor 3 subunit B	Eif3b	Eif3b	Eukaryotic translation initiation factor 3 subunit B
-0.0532851	1.57449	-0.451641	-0.409928	-1.79892	0.409121	1.24354	-0.436222	-0.0771573		7	7	7	NaN	NaN	NaN	NaN	0	NaN	867120000	36	310	35400.5	21	0	Q4G069	Q4G069	Regulator of microtubule dynamics protein 1	Rmdn1	Rmdn1	Regulator of microtubule dynamics protein 1
NaN	-0.630406	NaN	NaN	NaN	NaN	1.47512	-0.60923	-0.235482		2	2	2	NaN	NaN	NaN	NaN	NaN	NaN	184840000	5	617	71296.3	35	0	Q4G074	Q4G074	KIF1-binding protein	Kbp	Kbp	KIF1-binding protein
0.621215	-0.376066	0.215156	0.579929	0.896571	1.51078	-1.0832	-1.0494	-1.31499		13	13	13	NaN	NaN	NaN	NaN	0	NaN	8653700000	213	379	42727	18	0	Q4G075	Q4G075	Leukocyte elastase inhibitor A	Serpinb1a	Serpinb1a	Leukocyte elastase inhibitor A
0.224609	-0.822935	-1.12467	0.775387	NaN	1.92388	0.0819726	-0.266219	-0.792027		3	3	3	NaN	NaN	NaN	NaN	0	NaN	1296500000	21	151	16320.4	10	0	Q4KLF8	Q4KLF8	Actin-related protein 2/3 complex subunit 5	Arpc5	Arpc5	Actin-related protein 2/3 complex subunit 5
NaN	-1.14887	NaN	NaN	NaN	NaN	0.674789	0.474083	NaN		2	2	2	NaN	NaN	NaN	NaN	NaN	NaN	147460000	6	561	58170	17	0	Q4KLH5	Q4KLH5	Arf-GAP domain and FG repeat-containing protein 1	Agfg1	Agfg1	Arf-GAP domain and FG repeat-containing protein 1
NaN	NaN	NaN	NaN	NaN	NaN	NaN	-0.707107	0.707107		3	3	3	NaN	NaN	NaN	NaN	NaN	NaN	336050000	2	643	74675.1	24	0	Q4KLL4	Q4KLL4	Transmembrane 9 superfamily member 4	Tm9sf4	Tm9sf4	Transmembrane 9 superfamily member 4
-0.928478	0.9319	0.562056	-0.628251	-0.2777	-1.16203	-0.742522	0.394491	1.85054		6	6	6	NaN	NaN	NaN	NaN	0	NaN	310920000	12	920	102642	35	0	Q4KLP0	Q4KLP0	Probable 2-oxoglutarate dehydrogenase E1 component DHKTD1, mitochondrial	Dhtkd1	Dhtkd1	Probable 2-oxoglutarate dehydrogenase E1 component DHKTD1, mitochondrial
NaN	NaN	NaN	NaN	0.707107	NaN	NaN	-0.707107	NaN		2	2	2	NaN	NaN	NaN	NaN	NaN	NaN	1035300000	13	603	65238.6	31	0	Q4KLY2	Q4KLY2	F-box only protein 46	Fbxo46	Fbxo46	F-box only protein 46
0.582782	0.604705	-0.548505	-0.60153	2.22431	-0.74387	-0.0146341	-0.77367	-0.729591		9	9	9	23	23	23	NaN	0	NaN	2032400000	83	578	59443.9	32	0	Q4KLZ6	Q4KLZ6	Bifunctional ATP-dependent dihydroxyacetone kinase/FAD-AMP lyase (cyclizing);ATP-dependent dihydroxyacetone kinase;FAD-AMP lyase (cyclizing)	Dak	Tkfc	Triokinase/FMN cyclase
1.59015	0.370583	0.40133	-1.11456	0.713699	-1.17701	0.552601	-1.31538	-0.021402		21	21	21	46	46	46	NaN	0	NaN	7087300000	221	528	59115.3	38	0	Q4KM49	Q4KM49	Tyrosine--tRNA ligase, cytoplasmic;Tyrosine--tRNA ligase, cytoplasmic, N-terminally processed	Yars	Yars	Tyrosine--tRNA ligase, cytoplasmic
0.17084	-0.39246	-0.989103	1.49506	-0.0248176	1.6631	-0.456081	-0.207246	-1.25929		8	8	8	NaN	NaN	NaN	NaN	0	NaN	6623400000	169	196	22169.3	11	0	Q4KM73	Q4KM73	UMP-CMP kinase	Cmpk1	Cmpk1	UMP-CMP kinase
-0.129319	0.619103	0.541017	-2.06845	0.523523	-1.17314	0.222425	1.09029	0.374547		6	6	6	NaN	NaN	NaN	NaN	0	NaN	3471700000	102	215	24740.6	12	0	Q4KM74	Q4KM74	Vesicle-trafficking protein SEC22b	Sec22b	Sec22b	Vesicle-trafficking protein SEC22b
-0.816092	0.346117	1.66364	NaN	NaN	NaN	-1.13843	0.245267	-0.300508		6	6	6	NaN	NaN	NaN	NaN	0	NaN	425170000	16	297	33679.1	16	0	Q4QQR9	Q4QQR9	Protein MEMO1	Memo1	Memo1	Protein MEMO1
0.0884381	0.664636	0.932587	-1.42696	1.34972	-1.66272	-0.103339	0.21114	-0.0535054		7	7	7	NaN	NaN	NaN	NaN	0	NaN	7554500000	110	601	66006.4	30	0	Q4QQT4	Q4QQT4	Serine/threonine-protein phosphatase 2A 65 kDa regulatory subunit A beta isoform	Ppp2r1b	Ppp2r1b	Serine/threonine-protein phosphatase 2A 65 kDa regulatory subunit A beta isoform
-0.10867	1.19509	1.53829	-0.558906	-1.90517	-0.406605	0.290929	-0.00550218	-0.0394508		4	4	4	NaN	NaN	NaN	NaN	0	NaN	2597100000	61	155	17827	8	0	Q4QQV3	Q4QQV3	Protein FAM162A	Fam162a	Fam162a	Protein FAM162A
-0.993389	-1.00062	-1.29314	1.28803	0.941786	-0.244932	0.381662	1.2233	-0.302699		6	6	6	NaN	NaN	NaN	NaN	0	NaN	725120000	34	585	65455.6	26	0	Q4QQW8	Q4QQW8	Putative phospholipase B-like 2	Plbd2	Plbd2	Putative phospholipase B-like 2
0.31211	-1.25182	-0.495962	-0.234822	-1.17712	1.88164	-0.392841	0.803259	0.555561		5	5	5	NaN	NaN	NaN	NaN	0	NaN	821450000	38	342	37075.7	12	0	Q4QR85	Q4QR85	Methylosome protein 50	Wdr77	Wdr77	Methylosome protein 50
-0.737991	0.249535	0.850776	-1.50638	0.764466	-1.05686	-0.374475	1.58324	0.22769		26	13	13	NaN	NaN	NaN	NaN	0	NaN	59517000000	770	450	50418.7	20	0	Q4QRB4;CON__ENSEMBL:ENSBTAP00000025008	Q4QRB4	Tubulin beta-3 chain	Tubb3	Tubb3	Tubulin beta-3 chain
0.832056	0.0912105	-0.849074	0.288547	NaN	0.86887	1.11859	-1.77812	-0.57208		8	8	8	NaN	NaN	NaN	NaN	0	NaN	1033700000	40	305	33746.8	15	0	Q4V7A0	Q4V7A0	WD repeat-containing protein 61;WD repeat-containing protein 61, N-terminally processed	Wdr61	Wdr61	WD repeat-containing protein 61
0.669804	0.67633	1.10793	0.783599	-0.0685601	-2.08886	-0.922353	-0.181862	0.0239754		15	15	15	NaN	NaN	NaN	NaN	0	NaN	3135900000	91	693	76757.4	42	0	Q4V7C6	Q4V7C6	GMP synthase [glutamine-hydrolyzing]	Gmps	Gmps	GMP synthase [glutamine-hydrolyzing]
0.0745683	0.23771	0.267816	-1.05013	1.60665	-1.03064	-1.30387	1.19154	0.00635653		17	17	17	NaN	NaN	NaN	NaN	0	NaN	16235000000	351	418	47357.2	21	0	Q4V7C7	Q4V7C7	Actin-related protein 3	Actr3	Actr3	Actin-related protein 3
0.306968	0.324177	1.60458	-0.233476	-1.65116	-1.17552	-0.388456	0.309078	0.903806		9	9	9	NaN	NaN	NaN	NaN	0	NaN	1940800000	92	287	32205.1	20	0	Q4V7D2	Q4V7D2	Protein rogdi homolog	Rogdi	Rogdi	Protein rogdi homolog
NaN	NaN	NaN	NaN	NaN	NaN	-0.707107	NaN	0.707107		2	2	2	NaN	NaN	NaN	NaN	0	NaN	161040000	2	376	41518.7	19	0	Q4V7D6	Q4V7D6	NIF3-like protein 1	Nif3l1	Nif3l1	NIF3-like protein 1
0.116204	-0.741956	-0.822439	1.7018	-1.0458	1.55537	0.0472901	-0.504988	-0.305484		4	4	4	NaN	NaN	NaN	NaN	0	NaN	655950000	27	420	45696.8	22	0	Q4V7F2	Q4V7F2	Cysteine-rich with EGF-like domain protein 1	Creld1	Creld1	Cysteine-rich with EGF-like domain protein 1
0.825554	0.264934	-0.101446	0.376887	-2.24439	0.678723	0.94739	-0.832603	0.0849502		10	10	10	NaN	NaN	NaN	NaN	0	NaN	2346100000	101	839	92810.1	40	0	Q4V8B0	Q4V8B0	Oxidation resistance protein 1	Oxr1	Oxr1	Oxidation resistance protein 1
-0.323	0.370074	0.504143	-1.45929	0.0183946	-1.24966	-0.521146	1.36427	1.29622		5	5	5	NaN	NaN	NaN	NaN	0	NaN	1076700000	53	330	36907.6	16	0	Q4V8B7	Q4V8B7	Inactive hydroxysteroid dehydrogenase-like protein 1	Hsdl1	Hsdl1	Inactive hydroxysteroid dehydrogenase-like protein 1
1.24007	-0.149883	-0.864376	-0.0166443	1.30311	0.122138	-1.96912	0.318824	0.015885		22	22	21	38	38	37	NaN	0	NaN	10453000000	283	814	89801.7	40	0	Q4V8C3	Q4V8C3	Echinoderm microtubule-associated protein-like 1	Eml1	Eml1	Echinoderm microtubule-associated protein-like 1
NaN	-0.425932	0.755756	NaN	NaN	NaN	-1.21206	NaN	0.882232		2	2	2	NaN	NaN	NaN	NaN	0	NaN	98929000	9	313	34355.1	14	0	Q4V8C7	Q4V8C7	Interferon-inducible double-stranded RNA-dependent protein kinase activator A	Prkra	Prkra	Interferon-inducible double-stranded RNA-dependent protein kinase activator A
0.682112	-0.54951	NaN	-0.867018	NaN	NaN	1.7278	-0.46246	-0.530924		5	5	5	21	21	21	NaN	0	NaN	428530000	19	343	39589.9	18	0	Q4V8E4	Q4V8E4	Cilia- and flagella-associated protein 36	Cfap36	Cfap36	Cilia- and flagella-associated protein 36
0.996491	1.21402	-0.00145876	0.815824	-1.90592	-0.344397	0.0347082	-1.03225	0.222985		11	11	11	NaN	NaN	NaN	NaN	0	NaN	2922800000	103	524	58343.9	32	0	Q4V8F9	Q4V8F9	Hydroxysteroid dehydrogenase-like protein 2	Hsdl2	Hsdl2	Hydroxysteroid dehydrogenase-like protein 2
0.827007	0.183392	-0.161318	-0.239292	1.88332	-1.55341	0.357009	-1.01646	-0.280254		13	13	13	NaN	NaN	NaN	NaN	0	NaN	1965800000	60	810	94161.7	45	0	Q4V8I7	Q4V8I7	Volume-regulated anion channel subunit LRRC8A	Lrrc8a	Lrrc8a	Volume-regulated anion channel subunit LRRC8A
-0.024027	-0.819164	-0.140957	0.298664	NaN	0.99289	1.70413	-0.614428	-1.39711		3	3	3	NaN	NaN	NaN	NaN	NaN	NaN	682510000	20	457	51011.5	22	0	Q4V8J4	Q4V8J4	Glycerol-3-phosphate acyltransferase 3	Agpat9	Gpat3	Glycerol-3-phosphate acyltransferase 3
1.49941	0.747799	-0.340974	-1.80332	0.638982	-1.09446	0.456608	-0.00554621	-0.0985007		6	6	6	NaN	NaN	NaN	NaN	0	NaN	2241300000	32	411	46191.9	18	0	Q4V8K5	Q4V8K5	BRO1 domain-containing protein BROX	Brox	Brox	BRO1 domain-containing protein BROX
-1.10331	0.278635	0.437334	-0.717698	1.04323	-0.592071	-1.48186	0.863844	1.27189		11	11	11	NaN	NaN	NaN	NaN	0	NaN	1212600000	67	1103	128431	64	0	Q4VSI4	Q4VSI4	Ubiquitin carboxyl-terminal hydrolase 7	Usp7	Usp7	Ubiquitin carboxyl-terminal hydrolase 7
-0.679167	0.0676001	1.05617	-1.7444	NaN	-0.55279	-0.126384	0.770404	1.20858		6	6	6	NaN	NaN	NaN	NaN	0	NaN	2392800000	35	320	34170	21	0	Q505J6	Q505J6	Mitochondrial glutamate carrier 2	Slc25a18	Slc25a18	Mitochondrial glutamate carrier 2
-0.0466887	0.896397	1.10712	-0.921085	-1.8125	NaN	-0.329433	0.792547	0.313636		9	9	9	NaN	NaN	NaN	NaN	0	NaN	965640000	46	508	57719.9	24	0	Q505J8	Q505J8	Phenylalanine--tRNA ligase alpha subunit	Farsa	Farsa	Phenylalanine--tRNA ligase alpha subunit
0.141829	0.584465	0.205644	-1.64917	-0.813889	-1.10516	0.402969	0.706664	1.52665		6	6	6	NaN	NaN	NaN	NaN	0	NaN	1926500000	70	361	40717	20	0	Q505J9	Q505J9	ATPase family AAA domain-containing protein 1	Atad1	Atad1	ATPase family AAA domain-containing protein 1
0.107619	0.417288	1.01699	-1.46646	NaN	-1.42584	-0.282146	1.11982	0.512731		3	3	3	NaN	NaN	NaN	NaN	0	NaN	398820000	17	288	32484.1	16	0	Q561R9	Q561R9	Beta-lactamase-like protein 2	Lactb2	Lactb2	Endoribonuclease LACTB2
-0.363287	0.090907	1.13188	-1.91591	0.270213	-1.05883	0.0466939	1.11661	0.681729		12	12	12	NaN	NaN	NaN	NaN	0	NaN	11044000000	181	355	40493.1	20	0	Q561S0	Q561S0	NADH dehydrogenase [ubiquinone] 1 alpha subcomplex subunit 10, mitochondrial	Ndufa10	Ndufa10	NADH dehydrogenase [ubiquinone] 1 alpha subcomplex subunit 10, mitochondrial
0.894167	-0.975299	0.381278	1.58315	NaN	0.349764	-1.46472	-0.515706	-0.252636		3	3	3	NaN	NaN	NaN	NaN	0	NaN	476750000	17	299	34638.2	15	0	Q562C6	Q562C6	Leucine zipper transcription factor-like protein 1	Lztfl1	Lztfl1	Leucine zipper transcription factor-like protein 1
0.17055	0.693356	1.03308	0.0573087	0.866462	0.923421	-1.28903	-0.962323	-1.49282		4	4	4	NaN	NaN	NaN	NaN	0	NaN	2311300000	60	168	19095.6	9	0	Q566C7	Q566C7	Diphosphoinositol polyphosphate phosphohydrolase 1	Nudt3	Nudt3	Diphosphoinositol polyphosphate phosphohydrolase 1
0.781338	1.74154	-0.204173	-1.42013	NaN	-1.01639	0.0253358	0.406866	-0.314387		5	5	5	NaN	NaN	NaN	NaN	0	NaN	436950000	30	251	27492.9	14	0	Q566Q8	Q566Q8	UPF0696 protein C11orf68 homolog	Bles03	Bles03	UPF0696 protein C11orf68 homolog
1.36898	0.782101	0.611393	-0.0804858	-0.706242	1.08926	-0.563186	-1.21972	-1.2821		5	5	5	27	27	27	NaN	0	NaN	1933400000	75	230	26089.3	10	0	Q566R0	Q566R0	Acyl-coenzyme A thioesterase THEM4	Them4	Them4	Acyl-coenzyme A thioesterase THEM4
NaN	-0.707107	NaN	NaN	NaN	NaN	NaN	NaN	0.707107		2	2	2	NaN	NaN	NaN	NaN	NaN	NaN	73277000	2	180	20160.5	10	0	Q568Z4	Q568Z4	Signal peptidase complex subunit 3	Spcs3	Spcs3	Signal peptidase complex subunit 3
1.81159	-0.706824	-1.63171	-0.133429	0.406319	-0.698954	0.62485	0.633307	-0.305144		6	6	6	NaN	NaN	NaN	NaN	0	NaN	1566400000	26	366	39941.9	11	0	Q568Z6	Q568Z6	IST1 homolog	Ist1	Ist1	IST1 homolog
0.990331	0.890783	0.870494	0.15821	-1.99363	-0.639875	-0.841369	-0.0268184	0.591879		8	6	6	NaN	NaN	NaN	NaN	0	NaN	1784400000	44	330	37554.6	16	0	Q568Z9	Q568Z9	Phytanoyl-CoA hydroxylase-interacting protein	Phyhip	Phyhip	Phytanoyl-CoA hydroxylase-interacting protein
NaN	-1.18558	1.02969	NaN	NaN	NaN	NaN	-0.432935	0.588818		4	4	4	NaN	NaN	NaN	NaN	0	NaN	193060000	14	445	50877.1	22	0	Q56AP7	Q56AP7	Protein cereblon	Crbn	Crbn	Protein cereblon
0.933298	1.05889	1.09515	-0.267814	0.137617	-0.288093	-1.96711	-0.860301	0.158369		7	7	7	NaN	NaN	NaN	NaN	0	NaN	1574300000	45	454	51044.1	23	0	Q58FK9	Q58FK9	Kynurenine--oxoglutarate transaminase 3	Ccbl2	Kyat3	Kynurenine--oxoglutarate transaminase 3
NaN	0.36301	0.403706	NaN	NaN	NaN	NaN	-1.48138	0.714667		6	4	4	NaN	NaN	NaN	NaN	0	NaN	298690000	14	307	35067.9	16	0	Q5BJ92	Q5BJ92	Serine/threonine-protein phosphatase 4 catalytic subunit	Ppp4c	Ppp4c	Serine/threonine-protein phosphatase 4 catalytic subunit
-0.639529	-1.70298	NaN	0.895576	NaN	1.18377	0.268376	0.453161	-0.458374		3	3	3	NaN	NaN	NaN	NaN	NaN	NaN	581520000	9	649	72225.6	27	0	Q5BJQ0	Q5BJQ0	Atypical kinase ADCK3, mitochondrial	Adck3	Coq8a	Atypical kinase COQ8A, mitochondrial
0.0848967	0.129939	-2.11377	1.14794	NaN	NaN	0.229105	0.233878	0.288013		2	2	2	NaN	NaN	NaN	NaN	NaN	NaN	365240000	20	482	52728.9	17	0	Q5BJQ2	Q5BJQ2	Protein FAM63A	Fam63a	Fam63a	Ubiquitin carboxyl-terminal hydrolase MINDY-1
0.00405962	-0.797945	0.944044	-1.20039	1.62075	-1.06568	-0.626703	0.209803	0.912059		2	2	2	NaN	NaN	NaN	NaN	0	NaN	1639800000	37	554.5	61894.6	26.5	0	Q5BJS7;H1UBN0	Q5BJS7;H1UBN0	Copine-9	Cpne9;Cpne7	Cpne9;Cpne7	Copine-9;Copine-7
-0.215537	0.935087	0.962908	-1.61656	-1.36569	-0.579655	0.409021	0.523991	0.946431		6	6	6	NaN	NaN	NaN	NaN	0	NaN	568780000	19	629	72635.9	36	0	Q5BJT7	Q5BJT7	Coiled-coil domain-containing protein 93	Ccdc93	Ccdc93	Coiled-coil domain-containing protein 93
-0.720207	0.0958723	-0.0590632	-1.35456	-0.47375	-1.01441	0.927126	1.03172	1.56727		5	5	5	NaN	NaN	NaN	NaN	0	NaN	1331800000	34	346	41079.6	15	0	Q5BK32	Q5BK32	FAS-associated factor 2	Faf2	Faf2	FAS-associated factor 2
0.134579	0.414065	1.20767	-1.46905	-0.39099	-1.34885	-0.507872	0.835376	1.12508		15	15	15	44	44	44	NaN	0	NaN	19102000000	360	377	42559.2	26	0	Q5BK63	Q5BK63	NADH dehydrogenase [ubiquinone] 1 alpha subcomplex subunit 9, mitochondrial	Ndufa9	Ndufa9	NADH dehydrogenase [ubiquinone] 1 alpha subcomplex subunit 9, mitochondrial
0.587486	0.473584	-0.256934	1.60708	-0.0588855	0.985287	-0.88934	-1.3232	-1.12508		6	6	6	NaN	NaN	NaN	NaN	0	NaN	3063400000	89	351	38136.4	13	0	Q5BK81	Q5BK81	Prostaglandin reductase 2	Ptgr2	Ptgr2	Prostaglandin reductase 2
-0.481795	-1.02167	NaN	NaN	NaN	NaN	1.42743	0.622656	-0.546622		2	2	2	NaN	NaN	NaN	NaN	0	NaN	873840000	22	516	60047.1	21	0	Q5BQE6	Q5BQE6	Delta(24)-sterol reductase	Dhcr24	Dhcr24	Delta(24)-sterol reductase
-1.21828	0.0221508	1.35544	-0.422484	NaN	-1.47807	0.382543	0.328995	1.02971		6	6	6	NaN	NaN	NaN	NaN	0	NaN	713130000	38	418	46210.3	22	0	Q5EB62	Q5EB62	Solute carrier family 25 member 46	Slc25a46	Slc25a46	Solute carrier family 25 member 46
0.109799	0.42327	0.179968	-0.226823	-1.867	-0.195817	1.70927	-0.86337	0.730701		10	10	10	NaN	NaN	NaN	NaN	0	NaN	7625100000	131	206	22976.1	13	0	Q5EB77	Q5EB77	Ras-related protein Rab-18	Rab18	Rab18	Ras-related protein Rab-18
0.741547	0.484004	0.844069	0.450938	-1.33312	-1.78912	0.17107	-0.559272	0.989879		7	7	7	NaN	NaN	NaN	NaN	0	NaN	3233700000	86	305	34222.9	14	0	Q5EB81	Q5EB81	NADH-cytochrome b5 reductase 1	Cyb5r1	Cyb5r1	NADH-cytochrome b5 reductase 1
-0.987565	-0.916079	-0.089864	NaN	NaN	NaN	NaN	1.3053	0.688207		2	2	2	NaN	NaN	NaN	NaN	NaN	NaN	101020000	5	776	86705.7	40	0	Q5EBA1	Q5EBA1	ATP-dependent RNA helicase SUPV3L1, mitochondrial	Supv3l1	Supv3l1	ATP-dependent RNA helicase SUPV3L1, mitochondrial
1.78478	0.370455	0.269577	0.727465	-1.44306	0.533455	-0.855187	-0.77908	-0.608403		6	6	6	NaN	NaN	NaN	NaN	0	NaN	2940900000	123	198	22369.5	14	0	Q5EGY4	Q5EGY4	Synaptobrevin homolog YKT6	Ykt6	Ykt6	Synaptobrevin homolog YKT6
-0.866791	-0.552245	-0.196248	-0.774575	NaN	NaN	NaN	0.720849	1.66901		5	5	5	NaN	NaN	NaN	NaN	0	NaN	143340000	19	985	111909	52	0	Q5FVC2	Q5FVC2	Rho guanine nucleotide exchange factor 2	Arhgef2	Arhgef2	Rho guanine nucleotide exchange factor 2
1.08963	0.445696	-0.0436049	-2.11596	NaN	NaN	0.165414	0.196096	0.262729		7	7	7	NaN	NaN	NaN	NaN	0	NaN	529930000	25	770	87229.8	41	0	Q5FVC7	Q5FVC7	Arf-GAP with coiled-coil, ANK repeat and PH domain-containing protein 2	Acap2	Acap2	Arf-GAP with coiled-coil, ANK repeat and PH domain-containing protein 2
-0.0609707	-0.388997	-0.190468	0.0777981	2.56981	-0.455294	-0.691382	-0.16268	-0.697815		8	8	8	NaN	NaN	NaN	NaN	0	NaN	1970600000	64	488	54399.1	16	0	Q5FVH2	Q5FVH2	Phospholipase D3	Pld3	Pld3	Phospholipase D3
-0.467354	0.0424135	1.67987	0.749964	0.359162	-0.457774	-0.487336	-1.89535	0.476411		4	4	4	NaN	NaN	NaN	NaN	0	NaN	825140000	17	239	26724.1	14	0	Q5FVI3	Q5FVI3	Leucine-rich repeat-containing protein 57	Lrrc57	Lrrc57	Leucine-rich repeat-containing protein 57
-0.185104	-0.754588	-0.586415	2.24693	-0.626395	0.984462	0.02783	-0.673872	-0.432846		3	3	3	NaN	NaN	NaN	NaN	0	NaN	7123700000	58	149	15043	6	0	Q5FVI4	Q5FVI4	Cell cycle exit and neuronal differentiation protein 1	Cend1	Cend1	Cell cycle exit and neuronal differentiation protein 1
0.370585	0.230413	0.906198	-1.50566	0.85671	-1.72911	-0.413333	0.609188	0.67501		18	18	18	45	45	45	NaN	0	NaN	12333000000	263	382	43900.6	27	0	Q5FVI6;Q6AYE4	Q5FVI6	V-type proton ATPase subunit C 1	Atp6v1c1	Atp6v1c1	V-type proton ATPase subunit C 1
1.17278	0.376884	1.24043	-0.58159	-1.64268	-1.03827	0.631352	0.377701	-0.536613		14	14	14	NaN	NaN	NaN	NaN	0	NaN	16189000000	305	469	52906.8	26	0	Q5FVJ0	Q5FVJ0	Protein RUFY3	Rufy3	Rufy3	Protein RUFY3
0.814781	0.0328701	-0.86798	1.06796	NaN	-1.62162	0.988079	0.405103	-0.819194		7	7	7	NaN	NaN	NaN	NaN	0	NaN	934010000	28	850	93533.6	38	0	Q5FVK6	Q5FVK6	Coiled-coil and C2 domain-containing protein 1B	Cc2d1b	Cc2d1b	Coiled-coil and C2 domain-containing protein 1B
-1.48849	0.30526	0.309183	0.0803115	0.444871	-1.84538	0.388432	1.22265	0.583169		5	5	5	NaN	NaN	NaN	NaN	0	NaN	2983000000	32	207	23405.5	11	0	Q5FVL2	Q5FVL2	ER membrane protein complex subunit 8	Emc8	Emc8	ER membrane protein complex subunit 8
0.074503	0.852298	0.624201	-1.21083	NaN	-1.49027	-0.569632	0.419312	1.30042		3	3	3	NaN	NaN	NaN	NaN	0	NaN	567380000	25	476	54925.3	21	0	Q5FVM4	Q5FVM4	Non-POU domain-containing octamer-binding protein	Nono	Nono	Non-POU domain-containing octamer-binding protein
-1.17738	1.20148	-0.125456	0.442125	NaN	0.323528	0.164434	-1.7342	0.905464		2	2	2	NaN	NaN	NaN	NaN	NaN	NaN	494440000	7	748	85686.3	41	0	Q5FVM6	Q5FVM6	Myotubularin-related protein 12	Mtmr12	Mtmr12	Myotubularin-related protein 12
-0.315387	-0.781772	-1.26722	0.567324	0.990404	-1.36797	1.23714	-0.0506106	0.988093		9	9	9	NaN	NaN	NaN	NaN	0	NaN	3409400000	119	291	32418.1	16	0	Q5FVQ4	Q5FVQ4	Malectin	Mlec	Mlec	Malectin
-0.857061	-0.106531	1.69312	-1.25484	NaN	NaN	-0.514121	0.584162	0.455274		9	9	9	NaN	NaN	NaN	NaN	0	NaN	465620000	21	973	107590	48	0	Q5FVQ8	Q5FVQ8	NLR family member X1	Nlrx1	Nlrx1	NLR family member X1
0.57866	-0.732118	0.376429	-1.89145	1.56391	-0.599843	0.756938	-0.148574	0.0960539		7	7	7	NaN	NaN	NaN	NaN	0	NaN	861050000	35	524	59042.8	34	0	Q5FVQ9	Q5FVQ9	Tubulin-specific chaperone E	Tbce	Tbce	Tubulin-specific chaperone E
-0.422554	-0.549619	1.80168	-1.45266	NaN	NaN	0.0623696	0.249272	0.311512		3	3	3	NaN	NaN	NaN	NaN	0	NaN	284670000	17	515	55070.4	23	0	Q5FWT1	Q5FWT1	Protein FAM98A	Fam98a	Fam98a	Protein FAM98A
0.204142	0.0538029	2.10058	-0.525291	NaN	-1.10508	-0.833601	-0.362848	0.468293		5	5	5	NaN	NaN	NaN	NaN	0	NaN	702030000	13	318	36866.7	16	0	Q5FWT7	Q5FWT7	Ubiquitin-like domain-containing CTD phosphatase 1	Ublcp1	Ublcp1	Ubiquitin-like domain-containing CTD phosphatase 1
0.0469668	-0.664496	-1.72315	0.958707	NaN	0.590673	1.30679	-0.746832	0.23134		5	5	5	NaN	NaN	NaN	NaN	0	NaN	756110000	13	330	37598.9	15	0	Q5FWY5	Q5FWY5	AH receptor-interacting protein	Aip	Aip	AH receptor-interacting protein
0.772815	1.1078	0.209412	0.718394	-1.10851	1.1269	-1.09893	-1.32026	-0.407614		11	11	11	NaN	NaN	NaN	NaN	0	NaN	12621000000	270	317	35994.9	17	0	Q5GFD9	Q5GFD9	Protein IMPACT	Impact	Impact	Protein IMPACT
-0.0840109	0.963816	1.19344	-1.48309	-0.178659	-1.40582	-0.524291	0.71501	0.803605		19	19	19	NaN	NaN	NaN	NaN	0	NaN	5912700000	134	726	83481.6	36	0	Q5HZA6	Q5HZA6	Prolyl endopeptidase-like	Prepl	Prepl	Prolyl endopeptidase-like
1.1433	0.682749	1.5921	-0.156815	-0.444383	0.28643	-1.37377	-0.913831	-0.815783		7	7	7	NaN	NaN	NaN	NaN	0	NaN	1777000000	35	369	39587.3	21	0	Q5HZE4	Q5HZE4	Methylthioribose-1-phosphate isomerase	Mri1	Mri1	Methylthioribose-1-phosphate isomerase
0.627652	0.372322	-0.273363	0.513911	1.92674	-0.0260451	-1.25035	-0.765812	-1.12505		17	17	17	NaN	NaN	NaN	NaN	0	NaN	7523400000	213	360	41297	21	0	Q5HZV9	Q5HZV9	Protein phosphatase 1 regulatory subunit 7	Ppp1r7	Ppp1r7	Protein phosphatase 1 regulatory subunit 7
NaN	NaN	NaN	-0.915744	NaN	-0.242495	0.906954	1.18594	-0.934657		2	2	2	NaN	NaN	NaN	NaN	0	NaN	141120000	7	506	56394	20	0	Q5HZY0	Q5HZY0	UBX domain-containing protein 4	Ubxn4	Ubxn4	UBX domain-containing protein 4
0.795144	0.854052	1.26354	-2.01311	-0.622278	-0.174908	-0.646535	0.220232	0.32386		5	5	5	NaN	NaN	NaN	NaN	0	NaN	2898300000	49	198	22409.9	10	0	Q5HZY2	Q5HZY2	GTP-binding protein SAR1b	Sar1b	Sar1b	GTP-binding protein SAR1b
0.184114	0.72187	1.41581	-0.402135	-1.08332	-0.940672	-1.35216	0.321236	1.13525		11	11	11	NaN	NaN	NaN	NaN	0	NaN	1201300000	46	715	79329.7	38	0	Q5I0C3	Q5I0C3	Methylcrotonoyl-CoA carboxylase subunit alpha, mitochondrial	Mccc1	Mccc1	Methylcrotonoyl-CoA carboxylase subunit alpha, mitochondrial
0.456169	0.382296	0.0239607	1.18403	0.220082	1.33128	-1.00185	-1.14098	-1.45499		15	15	15	NaN	NaN	NaN	NaN	0	NaN	9679800000	256	298	33267.7	21	0	Q5I0D1	Q5I0D1	Glyoxalase domain-containing protein 4	Glod4	Glod4	Glyoxalase domain-containing protein 4
0.169961	1.42618	-0.103995	-0.515199	1.57371	-1.15217	0.22932	-1.30349	-0.324317		4	4	4	NaN	NaN	NaN	NaN	0	NaN	1649400000	40	270	29190.3	13	0	Q5I0D5	Q5I0D5	Phospholysine phosphohistidine inorganic pyrophosphate phosphatase	Lhpp	Lhpp	Phospholysine phosphohistidine inorganic pyrophosphate phosphatase
0.682602	0.834307	1.38136	0.647905	0.163687	-1.21123	-1.34938	-1.09181	-0.0574478		13	13	13	NaN	NaN	NaN	NaN	0	NaN	4991200000	142	492	54750.5	25	0	Q5I0D7	Q5I0D7	Xaa-Pro dipeptidase	Pepd	Pepd	Xaa-Pro dipeptidase
0.167468	0.386508	0.224661	0.0383211	-2.3733	-0.678182	0.789443	0.649143	0.795941		3	3	3	NaN	NaN	NaN	NaN	0	NaN	1144400000	43	235	27028.1	13	0	Q5I0E7	Q5I0E7	Transmembrane emp24 domain-containing protein 9	Tmed9	Tmed9	Transmembrane emp24 domain-containing protein 9
0.888362	1.23943	1.10925	-0.715866	-0.83251	-1.67334	-0.496037	0.436549	0.0441651		18	18	18	NaN	NaN	NaN	NaN	0	NaN	11227000000	225	637	72030.2	34	0	Q5I0G4	Q5I0G4	Glycine--tRNA ligase	Gars	Gars	Glycine--tRNA ligase
-0.807742	0.534936	1.7291	-0.391717	0.961206	-1.1439	NaN	-0.82623	-0.0556538		4	4	4	NaN	NaN	NaN	NaN	0	NaN	361950000	8	338	37321.3	23	0	Q5I0K3	Q5I0K3	Citrate lyase subunit beta-like protein, mitochondrial	Clybl	Clybl	Citrate lyase subunit beta-like protein, mitochondrial
NaN	NaN	NaN	NaN	NaN	NaN	NaN	-0.707107	0.707107		3	3	3	NaN	NaN	NaN	NaN	NaN	NaN	329810000	4	297	33152.7	18	0	Q5I0K5	Q5I0K5	Mycophenolic acid acyl-glucuronide esterase, mitochondrial	Abhd10	Abhd10	Mycophenolic acid acyl-glucuronide esterase, mitochondrial
0.611557	-1.05387	NaN	-0.0576568	NaN	1.01712	1.33042	-0.904977	-0.942599		3	3	3	NaN	NaN	NaN	NaN	0	NaN	364710000	12	320	34044.9	10	0	Q5I0L4	Q5I0L4	Cytosolic Fe-S cluster assembly factor NUBP1	Nubp1	Nubp1	Cytosolic Fe-S cluster assembly factor NUBP1
0.0316494	-1.76112	1.22153	NaN	NaN	NaN	0.488839	-0.278704	0.297804		6	6	5	NaN	NaN	NaN	NaN	0	NaN	563950000	11	688	75594	32	0	Q5I6B8;D3ZSI8	Q5I6B8	Phosphatidylinositol 4-phosphate 5-kinase type-1 gamma	Pip5k1c	Pip5k1c	Phosphatidylinositol 4-phosphate 5-kinase type-1 gamma
0.656115	0.70658	0.854391	-1.29518	0.281668	-1.91717	-0.299643	0.116239	0.897		6	6	6	NaN	NaN	NaN	NaN	0	NaN	1445400000	63	403	44895.1	17	0	Q5M7A4	Q5M7A4	Ubiquitin-like modifier-activating enzyme 5	Uba5	Uba5	Ubiquitin-like modifier-activating enzyme 5
-0.0227768	0.235982	2.07394	-0.841469	NaN	NaN	-0.553652	-0.785199	-0.106829		5	5	5	39	39	39	NaN	0	NaN	2827900000	48	164	18658.5	8	0	Q5M7A7	Q5M7A7	CB1 cannabinoid receptor-interacting protein 1	Cnrip1	Cnrip1	CB1 cannabinoid receptor-interacting protein 1
0.923467	0.170091	0.689268	-0.891611	0.617471	-1.94014	-0.879506	0.842533	0.468425		10	10	10	NaN	NaN	NaN	NaN	0	NaN	9832400000	207	394	44733.8	13	0	Q5M7U6	Q5M7U6	Actin-related protein 2	Actr2	Actr2	Actin-related protein 2
0.665636	0.595527	-0.2424	1.24979	-1.37014	-0.988564	1.21452	-0.00548079	-1.11889		21	21	21	32	32	32	NaN	0	NaN	7008200000	222	1057	110301	44	0	Q5M7W5	Q5M7W5	Microtubule-associated protein 4	Map4	Map4	Microtubule-associated protein 4
0.338843	0.0288257	-1.08309	1.21356	-1.4056	1.44364	0.61425	-0.839482	-0.310949		7	7	7	NaN	NaN	NaN	NaN	0	NaN	1328100000	67	552	60636.8	25	0	Q5M7W6	Q5M7W6	Protein ITFG3	Itfg3	Fam234a	Protein FAM234A
-0.00838557	1.0888	0.121923	-0.398032	NaN	-0.777229	0.647549	-1.8189	1.14427		5	5	5	16	16	16	NaN	0	NaN	206190000	11	475	53332.7	26	0	Q5M7W7	Q5M7W7	Probable proline--tRNA ligase, mitochondrial	Pars2	Pars2	Probable proline--tRNA ligase, mitochondrial
-0.198185	0.611825	0.258264	NaN	NaN	NaN	1.12251	-1.80542	0.0110118		3	3	3	NaN	NaN	NaN	NaN	0	NaN	530010000	16	225	24967.6	13	0	Q5M819	Q5M819	Phosphoserine phosphatase	Psph	Psph	Phosphoserine phosphatase
0.218056	0.203888	0.823991	-0.241842	0.210049	-1.77203	-0.522367	1.7917	-0.711443		4	4	4	NaN	NaN	NaN	NaN	0	NaN	544710000	20	513	56380.1	24	0	Q5M821	Q5M821	Protein phosphatase 1H	Ppm1h	Ppm1h	Protein phosphatase 1H
0.721308	-0.0984076	-1.36172	1.00948	NaN	1.3704	0.0129439	-0.408269	-1.24574		6	6	6	NaN	NaN	NaN	NaN	0	NaN	1400800000	63	291	32178.5	17	0	Q5M827	Q5M827	Pirin	Pir	Pir	Pirin
0.531088	-0.0965263	0.0447824	0.221347	NaN	-2.36332	0.703995	0.237182	0.72145		6	6	6	NaN	NaN	NaN	NaN	0	NaN	316190000	31	912	102747	37	0	Q5M868	Q5M868	Non-lysosomal glucosylceramidase	Gba2	Gba2	Non-lysosomal glucosylceramidase
0.443148	0.195933	-0.485929	NaN	NaN	-1.39907	-0.563458	1.80394	0.00543966		3	3	3	NaN	NaN	NaN	NaN	0	NaN	266100000	10	418	46519.5	20	0	Q5M887	Q5M887	Trafficking protein particle complex subunit 13	Trappc13	Trappc13	Trafficking protein particle complex subunit 13
-0.52698	-1.27405	-0.582222	1.57135	NaN	0.401245	1.21713	-0.00115859	-0.805325		2	2	2	NaN	NaN	NaN	NaN	0	NaN	439880000	23	707	78120.9	21	0	Q5M9G3	Q5M9G3	Caprin-1	Caprin1	Caprin1	Caprin-1
-0.64799	-0.675232	1.51972	1.3253	NaN	-0.481794	NaN	-0.897672	-0.142333		9	9	8	NaN	NaN	NaN	NaN	0	NaN	711060000	26	767	84016.1	40	0	Q5MPA9	Q5MPA9	Serine/threonine-protein kinase DCLK2	Dclk2	Dclk2	Serine/threonine-protein kinase DCLK2
-0.970455	-0.449645	0.774205	NaN	NaN	NaN	-0.688995	NaN	1.33489		4	4	4	NaN	NaN	NaN	NaN	NaN	NaN	148370000	7	580	66717.1	28	0	Q5NDF0	Q5NDF0	Protein O-linked-mannose beta-1,4-N-acetylglucosaminyltransferase 2	Pomgnt2	Pomgnt2	Protein O-linked-mannose beta-1,4-N-acetylglucosaminyltransferase 2
-0.996495	-0.848836	-0.616112	0.722256	NaN	0.490696	1.88328	0.127702	-0.762492		2	2	2	NaN	NaN	NaN	NaN	0	NaN	560050000	8	155	16858.3	3	0	Q5PPG6	Q5PPG6	Nucleosome assembly protein 1-like 5	Nap1l5	Nap1l5	Nucleosome assembly protein 1-like 5
0.828728	0.761538	-0.247936	0.965984	1.22931	-0.0219139	-1.16566	-1.40616	-0.9439		5	5	5	NaN	NaN	NaN	NaN	0	NaN	2675600000	141	261	28874.7	11	0	Q5PPH0	Q5PPH0	Enolase-phosphatase E1	Enoph1	Enoph1	Enolase-phosphatase E1
-0.0390731	-0.0173316	0.0389106	-0.318091	NaN	2.3303	-0.969097	-0.507263	-0.518359		3	3	3	20	20	20	NaN	0	NaN	2976200000	55	280	31505.1	11	0	Q5PPI4	Q5PPI4	Lysosome-associated membrane glycoprotein 5	Lamp5	Lamp5	Lysosome-associated membrane glycoprotein 5
1.05311	0.0378505	-0.411668	1.20343	-1.9194	0.37749	0.840558	-0.44774	-0.733626		10	10	10	30	30	30	NaN	0	NaN	7138600000	180	404	44852.8	17	0	Q5PPJ9	Q5PPJ9	Endophilin-B2	Sh3glb2	Sh3glb2	Endophilin-B2
-0.119686	0.0548759	-1.08885	0.458157	NaN	2.00826	-0.639065	-1.01461	0.340913		3	3	3	NaN	NaN	NaN	NaN	0	NaN	527180000	36	386	43156.9	14	0	Q5PPK9	Q5PPK9	Protein TSSC1	Tssc1	Eipr1	Protein TSSC1
-0.0243505	0.147382	0.0354706	-0.848828	-1.30891	-1.27443	0.610817	1.32919	1.33366		10	10	10	NaN	NaN	NaN	NaN	0	NaN	2248700000	53	362	40411.6	24	0	Q5PPL3	Q5PPL3	Sterol-4-alpha-carboxylate 3-dehydrogenase, decarboxylating	Nsdhl	Nsdhl	Sterol-4-alpha-carboxylate 3-dehydrogenase, decarboxylating
-0.126313	-0.424507	-0.389365	-0.65079	2.43638	NaN	-0.46032	-0.134607	-0.250479		2	2	2	NaN	NaN	NaN	NaN	0	NaN	339970000	9	284	29993	12	0	Q5PPM8	Q5PPM8	Type 1 phosphatidylinositol 4,5-bisphosphate 4-phosphatase	Tmem55b	Tmem55b	Type 1 phosphatidylinositol 4,5-bisphosphate 4-phosphatase
0.101365	0.137113	-0.311626	1.57126	-1.46681	1.17404	0.539714	-0.697628	-1.04742		9	9	9	NaN	NaN	NaN	NaN	0	NaN	8606200000	126	176	18979.5	11	0	Q5PPN5	Q5PPN5	Tubulin polymerization-promoting protein family member 3	Tppp3	Tppp3	Tubulin polymerization-promoting protein family member 3
0.779514	0.528273	-0.0557929	NaN	NaN	NaN	0.988698	-1.67815	-0.56254		2	2	2	NaN	NaN	NaN	NaN	0	NaN	165010000	18	410	45813.3	24	0	Q5PPN7	Q5PPN7	Coiled-coil domain-containing protein 51	Ccdc51	Ccdc51	Coiled-coil domain-containing protein 51
-1.00589	1.11515	0.514055	-1.42417	NaN	-0.432535	NaN	1.11889	0.114499		2	2	2	NaN	NaN	NaN	NaN	0	NaN	174880000	9	424	48045.8	22	0	Q5PQJ7	Q5PQJ7	Tubulin-specific chaperone cofactor E-like protein	Tbcel	Tbcel	Tubulin-specific chaperone cofactor E-like protein
-1.18709	0.337818	NaN	0.936302	NaN	0.844354	0.920616	-0.523125	-1.32888		7	2	2	NaN	NaN	NaN	NaN	0	NaN	300570000	17	619	68963.9	38	0	Q5PQM2	Q5PQM2	Kinesin light chain 4	Klc4	Klc4	Kinesin light chain 4
0.213809	-0.996712	-0.826505	2.02601	-0.664269	1.05313	0.251736	-0.513513	-0.543693		8	7	7	NaN	NaN	NaN	NaN	0	NaN	10393000000	197	193	22245.2	13	0	Q5PQN0	Q5PQN0	Neurocalcin-delta	Ncald	Ncald	Neurocalcin-delta
NaN	-0.885785	-0.507804	NaN	NaN	NaN	NaN	-0.0055145	1.3991		2	2	2	NaN	NaN	NaN	NaN	0	NaN	143000000	6	460	53305.1	27	0	Q5PQN6	Q5PQN6	Spermatogenesis-defective protein 39 homolog	Vipas39	Vipas39	Spermatogenesis-defective protein 39 homolog
-0.0377039	-0.476786	-0.560213	2.53126	-0.570345	-0.174381	0.131103	-0.0202402	-0.822696		2	2	2	10	10	10	NaN	0	NaN	302810000	22	190	21394.4	10	0	Q5PQN7	Q5PQN7	Protein LZIC	Lzic	Lzic	Protein LZIC
-0.732964	-0.745355	-0.917665	1.75652	NaN	1.0723	0.494637	-0.185258	-0.742225		2	2	2	5	5	5	NaN	NaN	NaN	295330000	10	583	65649	29	0	Q5PQX1	Q5PQX1	Torsin-1A-interacting protein 1	Tor1aip1	Tor1aip1	Torsin-1A-interacting protein 1
-0.17255	-0.568292	-2.12239	0.711916	0.285358	-0.0443572	1.57689	0.0947349	0.238683		28	28	28	NaN	NaN	NaN	NaN	0	NaN	5273400000	181	1687	181110	63	0	Q5QD51	Q5QD51	A-kinase anchor protein 12	Akap12	Akap12	A-kinase anchor protein 12
0.395771	1.13754	1.35374	-0.906383	-1.15131	-1.50165	0.124469	0.547051	0.000766588		11	11	11	NaN	NaN	NaN	NaN	0	NaN	1600700000	60	447	51030.5	23	0	Q5QJC9	Q5QJC9	BAG family molecular chaperone regulator 5	Bag5	Bag5	BAG family molecular chaperone regulator 5
-0.461831	-0.697984	-0.420105	1.91835	NaN	0.758423	NaN	-0.183599	-0.913259		4	4	4	NaN	NaN	NaN	NaN	0	NaN	330310000	11	282	30810.4	14	0	Q5RJK8	Q5RJK8	Acyl-CoA-binding domain-containing protein 6	Acbd6	Acbd6	Acyl-CoA-binding domain-containing protein 6
0.22557	0.64404	-1.45471	1.30847	NaN	0.495362	0.65534	-0.566131	-1.30793		6	6	6	NaN	NaN	NaN	NaN	0	NaN	1394900000	38	282	32228	12	0	Q5RJL0	Q5RJL0	Ermin	Ermn	Ermn	Ermin
0.810668	1.08297	1.02533	0.456468	NaN	0.0432993	-1.21744	-1.14201	-1.05929		3	3	3	NaN	NaN	NaN	NaN	0	NaN	1334200000	38	316	36121.8	18	0	Q5RJP0	Q5RJP0	Aldose reductase-related protein 1	Akr1b7	Akr1b7	Aldose reductase-related protein 1
0.623616	0.745299	-2.52141	0.0173264	0.117891	-0.18054	0.567196	0.0595711	0.571045		20	20	20	NaN	NaN	NaN	NaN	0	NaN	123200000000	1456	350	39319.3	20	0	Q5RJQ4	Q5RJQ4	NAD-dependent protein deacetylase sirtuin-2	Sirt2	Sirt2	NAD-dependent protein deacetylase sirtuin-2
0.0662933	0.392057	-0.467307	-0.109884	-2.06421	-0.528048	1.435	0.323241	0.952853		11	11	11	NaN	NaN	NaN	NaN	0	NaN	4255300000	124	350	40090.5	20	0	Q5RJR2	Q5RJR2	Twinfilin-1	Twf1	Twf1	Twinfilin-1
-0.390615	0.288033	-0.00415734	-0.769087	-1.5349	NaN	1.46414	-0.309424	1.25601		3	3	3	NaN	NaN	NaN	NaN	0	NaN	236600000	12	307	34869.3	14	0	Q5RJR8	Q5RJR8	Leucine-rich repeat-containing protein 59	Lrrc59	Lrrc59	Leucine-rich repeat-containing protein 59
-0.0780421	-1.76332	NaN	NaN	NaN	1.04101	-0.297821	0.315421	0.782758		2	2	2	NaN	NaN	NaN	NaN	0	NaN	349940000	19	258	28884.3	9	0	Q5RK19	Q5RK19	Vacuolar-sorting protein SNF8	Snf8	Snf8	Vacuolar-sorting protein SNF8
1.90086	-1.13195	-1.18552	0.254379	NaN	0.453348	0.381051	-0.164882	-0.507297		6	6	6	28	28	28	NaN	0	NaN	1289700000	15	250	28752.5	17	0	Q5RK30	Q5RK30	Ribosome maturation protein SBDS	Sbds	Sbds	Ribosome maturation protein SBDS
1.66369	1.07641	0.339544	0.685651	-0.279651	-0.538381	-1.35213	-0.698735	-0.896393		16	16	16	NaN	NaN	NaN	NaN	0	NaN	48794000000	649	606	66181.4	30	0	Q5RKI0	Q5RKI0	WD repeat-containing protein 1	Wdr1	Wdr1	WD repeat-containing protein 1
0.172702	0.464228	1.12609	-0.668771	-1.77112	-0.14081	-0.962148	0.458031	1.32179		19	19	17	NaN	NaN	44	NaN	0	NaN	26307000000	466	407	46402.3	23	0	Q5RKI1	Q5RKI1	Eukaryotic initiation factor 4A-II;Eukaryotic initiation factor 4A-II, N-terminally processed	Eif4a2	Eif4a2	Eukaryotic initiation factor 4A-II
-0.235304	0.418733	1.51433	-1.11083	-0.938283	-1.36773	0.434885	0.153528	1.13067		5	5	5	NaN	NaN	NaN	NaN	0	NaN	401850000	31	714	77770.4	40	0	Q5RKI8	Q5RKI8	ATP-binding cassette sub-family B member 8, mitochondrial	Abcb8	Abcb8	ATP-binding cassette sub-family B member 8, mitochondrial
-0.536234	0.459856	1.13749	-1.56551	-0.791863	-0.913034	0.0704316	1.10996	1.0289		36	36	36	NaN	NaN	NaN	NaN	0	NaN	8517000000	347	1392	156653	89	0	Q5SGE0	Q5SGE0	Leucine-rich PPR motif-containing protein, mitochondrial	Lrpprc	Lrpprc	Leucine-rich PPR motif-containing protein, mitochondrial
NaN	0.707107	NaN	NaN	NaN	NaN	NaN	NaN	-0.707107		2	2	2	6	6	6	NaN	0	NaN	163500000	5	301	34499.8	19	0	Q5U1Y4	Q5U1Y4	1,5-anhydro-D-fructose reductase	Akr1e2	Akr1e2	1,5-anhydro-D-fructose reductase
-0.520226	0.45027	1.05634	-1.11749	-0.138089	-1.54601	-0.437152	1.23824	1.01412		15	15	15	NaN	NaN	NaN	NaN	0	NaN	1277200000	46	1386	154431	60	0	Q5U1Z0	Q5U1Z0	Rab3 GTPase-activating protein non-catalytic subunit	Rab3gap2	Rab3gap2	Rab3 GTPase-activating protein non-catalytic subunit
-0.598308	0.928641	-0.802211	-1.16279	-0.55712	-0.0651287	2.04619	-0.255405	0.466136		5	5	5	30	30	30	NaN	0	NaN	1777100000	80	180	20302.1	9	0	Q5U1Z2	Q5U1Z2	Trafficking protein particle complex subunit 3	Trappc3	Trappc3	Trafficking protein particle complex subunit 3
-1.66135	1.40689	NaN	NaN	0.29533	NaN	0.141911	-0.352638	0.169861		2	2	2	NaN	NaN	NaN	NaN	0	NaN	586210000	13	124	13579.7	7	0	Q5U204	Q5U204	Ragulator complex protein LAMTOR3	Lamtor3	Lamtor3	Ragulator complex protein LAMTOR3
0.989777	-0.00967873	0.939035	-0.568525	NaN	-1.54825	-1.11481	1.05253	0.259911		2	2	2	NaN	NaN	NaN	NaN	NaN	NaN	468820000	15	162	18762.4	10	0	Q5U211	Q5U211	Sorting nexin-3	Snx3	Snx3	Sorting nexin-3
-0.905746	NaN	NaN	NaN	NaN	NaN	NaN	1.07313	-0.167383		2	2	2	NaN	NaN	NaN	NaN	NaN	NaN	126650000	5	591	66155.7	28	0	Q5U2M6	Q5U2M6	DDB1- and CUL4-associated factor 8	Dcaf8	Dcaf8	DDB1- and CUL4-associated factor 8
-0.673462	0.624512	1.45678	-1.27791	NaN	-0.497703	-1.01871	0.415289	0.971202		5	5	5	NaN	NaN	NaN	NaN	0	NaN	251250000	18	586	65673.5	31	0	Q5U2N0	Q5U2N0	CTP synthase 2	Ctps2	Ctps2	CTP synthase 2
-1.14455	-0.323389	1.63831	-0.145469	-1.26013	0.230719	-0.743395	0.592185	1.15573		17	17	17	NaN	NaN	NaN	NaN	0	NaN	2154700000	55	1242	134984	58	0	Q5U2N3	Q5U2N3	Membrane-associated phosphatidylinositol transfer protein 1	Pitpnm1	Pitpnm1	Membrane-associated phosphatidylinositol transfer protein 1
NaN	-0.331823	NaN	1.12373	NaN	NaN	NaN	-0.791909	NaN		2	2	2	4	4	4	NaN	NaN	NaN	412280000	9	875	96609.1	45	0	Q5U2P1	Q5U2P1	Metal transporter CNNM2	Cnnm2	Cnnm2	Metal transporter CNNM2
-0.157097	-0.309969	-0.608886	2.57907	-0.232271	0.173856	-0.271642	-0.512797	-0.660268		2	2	2	NaN	NaN	NaN	NaN	0	NaN	543490000	10	315	34992.9	15	0	Q5U2Q3	Q5U2Q3	Ester hydrolase C11orf54 homolog			Ester hydrolase C11orf54 homolog
-0.972192	0.946482	-0.161807	-1.12877	0.186991	-0.649767	-0.2034	2.08556	-0.103091		8	8	8	NaN	NaN	NaN	NaN	0	NaN	1074000000	36	437	49030.9	25	0	Q5U2Q7	Q5U2Q7	Eukaryotic peptide chain release factor subunit 1	Etf1	Etf1	Eukaryotic peptide chain release factor subunit 1
-0.217417	0.0708567	0.32587	-0.501157	2.18725	-0.882722	-1.20669	0.634445	-0.410442		8	8	8	NaN	NaN	NaN	NaN	0	NaN	1101400000	27	334	37374.6	16	0	Q5U2R0	Q5U2R0	Methionine adenosyltransferase 2 subunit beta	Mat2b	Mat2b	Methionine adenosyltransferase 2 subunit beta
-0.0169693	0.809808	1.73593	-0.442323	NaN	-1.36657	NaN	-0.295966	-0.423912		3	3	3	NaN	NaN	NaN	NaN	0	NaN	154350000	15	461	52816.7	22	0	Q5U2U7	Q5U2U7	mRNA cap guanine-N7 methyltransferase	Rnmt	Rnmt	mRNA cap guanine-N7 methyltransferase
0.09839	-0.917897	-0.363275	NaN	NaN	-0.78243	-0.742188	1.66011	1.04729		3	3	3	NaN	NaN	NaN	NaN	0	NaN	263680000	4	261	29980	13	0	Q5U2V8	Q5U2V8	ER membrane protein complex subunit 3	Emc3	Emc3	ER membrane protein complex subunit 3
-0.0416168	0.121753	-2.17535	0.73623	NaN	0.966899	-0.00961624	0.789748	-0.388049		2	2	2	NaN	NaN	NaN	NaN	NaN	NaN	1159400000	22	893	100615	47	0	Q5U2X2	Q5U2X2	Sperm-associated antigen 1	Spag1	Spag1	Sperm-associated antigen 1
-1.21557	-1.70485	0.394954	1.34138	0.448753	1.00671	-0.618415	0.212799	0.134238		5	5	5	NaN	NaN	NaN	NaN	0	NaN	813350000	33	483	55732.7	21	0	Q5U2X6	Q5U2X6	Coiled-coil domain-containing protein 47	Ccdc47	Ccdc47	Coiled-coil domain-containing protein 47
-0.493633	-0.864436	-0.212859	0.464653	NaN	1.83354	-0.693579	-0.992646	0.958962		3	3	3	NaN	NaN	NaN	NaN	0	NaN	575100000	22	245	27876	16	0	Q5U2X7	Q5U2X7	Mitochondrial import inner membrane translocase subunit Tim21	Timm21	Timm21	Mitochondrial import inner membrane translocase subunit Tim21
-1.17033	-0.843587	-1.15644	1.65848	-0.0656745	1.22229	0.521762	0.0690067	-0.235505		9	9	7	NaN	NaN	NaN	NaN	0	NaN	6633700000	168	386	43916.7	16	0	Q5U2Z3	Q5U2Z3	Nucleosome assembly protein 1-like 4	Nap1l4	Nap1l4	Nucleosome assembly protein 1-like 4
0.834379	1.4252	0.513404	-0.422236	0.907924	-1.24223	-1.52477	-0.152284	-0.339378		29	29	29	NaN	NaN	NaN	NaN	0	NaN	43037000000	894	1058	117788	54	0	Q5U300	Q5U300	Ubiquitin-like modifier-activating enzyme 1	Uba1	Uba1	Ubiquitin-like modifier-activating enzyme 1
0.742173	-0.496184	-0.606352	0.00166217	-1.06184	2.19236	-0.616028	-0.582744	0.426944		5	5	5	NaN	NaN	NaN	NaN	0	NaN	1458500000	79	201	23025.2	12	0	Q5U316	Q5U316	Ras-related protein Rab-35	Rab35	Rab35	Ras-related protein Rab-35
-0.0392329	-0.137448	-1.01798	0.858288	-0.0212684	0.441577	0.243137	1.55381	-1.88089		6	6	6	NaN	NaN	NaN	NaN	0	NaN	4825800000	188	130	15040.1	7	0	Q5U318	Q5U318	Astrocytic phosphoprotein PEA-15	Pea15	Pea15	Astrocytic phosphoprotein PEA-15
-0.212195	0.413302	NaN	1.07348	NaN	-1.5911	NaN	0.316515	NaN		3	3	3	NaN	NaN	NaN	NaN	NaN	NaN	173830000	7	2259	260191	136	0	Q5U4E6	Q5U4E6	Golgin subfamily A member 4	Golga4	Golga4	Golgin subfamily A member 4
-0.0585661	0.2509	-1.75249	0.642379	NaN	1.67113	-0.573515	-0.484872	0.305032		7	7	7	NaN	NaN	NaN	NaN	0	NaN	2092600000	76	322	35547.6	13	0	Q5XFW8	Q5XFW8	Protein SEC13 homolog	Sec13	Sec13	Protein SEC13 homolog
0.254479	-0.643794	-0.836767	1.92751	0.289377	1.03234	-0.73132	-0.104336	-1.18749		7	6	6	NaN	NaN	NaN	NaN	0	NaN	667850000	42	199	22393.4	14	0	Q5XFX0	Q5XFX0	Transgelin-2	Tagln2	Tagln2	Transgelin-2
0.324612	1.03869	0.816758	-1.31401	0.439857	-0.778768	-1.64611	0.181099	0.937875		15	15	13	NaN	NaN	NaN	NaN	0	NaN	4582000000	104	695	80576	39	0	Q5XHY5	Q5XHY5	Threonine--tRNA ligase, cytoplasmic	Tars	Tars	Threonine--tRNA ligase, cytoplasmic
0.985416	0.120247	1.22744	-1.12387	0.152471	-0.96889	-1.59788	0.644396	0.560668		22	22	22	NaN	NaN	NaN	NaN	0	NaN	8819700000	203	706	80461.2	42	0	Q5XHZ0	Q5XHZ0	Heat shock protein 75 kDa, mitochondrial	Trap1	Trap1	Heat shock protein 75 kDa, mitochondrial
NaN	NaN	NaN	0.707107	NaN	NaN	-0.707107	NaN	NaN		2	2	2	NaN	NaN	NaN	NaN	0	NaN	42940000	7	131	14832.3	3	0	Q5XI20	Q5XI20	Maturin	Mturn	Mturn	Maturin
0.88963	1.05998	0.191036	-0.525102	-0.879962	-2.03541	0.848522	0.355541	0.0957612		11	11	11	NaN	NaN	NaN	NaN	0	NaN	39792000000	439	397	41108.4	16	0	Q5XI22	Q5XI22	Acetyl-CoA acetyltransferase, cytosolic	Acat2	Acat2	Acetyl-CoA acetyltransferase, cytosolic
0.916025	-1.45114	-0.690546	0.0578296	1.40128	-0.402469	-0.656828	-0.502736	1.32858		10	10	10	NaN	NaN	NaN	NaN	0	NaN	18013000000	222	272	30628.7	16	0	Q5XI32	Q5XI32	F-actin-capping protein subunit beta	Capzb	Capzb	F-actin-capping protein subunit beta
-0.131048	0.0853492	-0.333745	-1.93339	NaN	NaN	1.11101	0.892139	0.309681		2	2	2	4	4	4	NaN	0	NaN	118520000	18	651	74676.7	38	0	Q5XI55	Q5XI55	Peptide-N(4)-(N-acetyl-beta-glucosaminyl)asparagine amidase	Ngly1	Ngly1	Peptide-N(4)-(N-acetyl-beta-glucosaminyl)asparagine amidase
-0.62078	1.18797	-0.357513	0.700206	-0.175115	0.418603	1.42039	-1.44455	-1.12921		4	4	4	NaN	NaN	NaN	NaN	0	NaN	474240000	23	248	27324	13	0	Q5XI72	Q5XI72	Eukaryotic translation initiation factor 4H	Eif4h	Eif4h	Eukaryotic translation initiation factor 4H
1.37156	1.06901	0.662147	0.155204	-1.09048	0.55093	-0.300234	-1.14993	-1.26822		8	8	8	NaN	NaN	NaN	NaN	0	NaN	54336000000	476	204	23407.4	9	0	Q5XI73	Q5XI73	Rho GDP-dissociation inhibitor 1	Arhgdia	Arhgdia	Rho GDP-dissociation inhibitor 1
0.313751	0.859684	1.28622	-1.10255	-0.314428	-1.58657	-0.839196	0.602803	0.780284		41	41	41	NaN	NaN	NaN	NaN	0	NaN	47354000000	946	1023	116296	43	0	Q5XI78	Q5XI78	2-oxoglutarate dehydrogenase, mitochondrial	Ogdh	Ogdh	2-oxoglutarate dehydrogenase, mitochondrial
-0.43305	1.40683	0.338923	-1.28129	NaN	-0.728294	1.43953	-0.0564641	-0.686192		5	5	5	NaN	NaN	NaN	NaN	0	NaN	432180000	18	436	48715.8	26	0	Q5XI79	Q5XI79	NADH dehydrogenase [ubiquinone] complex I, assembly factor 7	Ndufaf7	Ndufaf7	Protein arginine methyltransferase NDUFAF7, mitochondrial
1.23648	0.155226	0.253736	NaN	-2.01264	NaN	0.188347	-0.285026	0.463881		3	3	2	NaN	NaN	7	NaN	0	NaN	391130000	11	568	63947.4	28	0	Q5XI81	Q5XI81	Fragile X mental retardation syndrome-related protein 1	Fxr1	Fxr1	Fragile X mental retardation syndrome-related protein 1
NaN	-0.534029	-0.396403	NaN	NaN	NaN	-0.565518	NaN	1.49595		6	6	6	NaN	NaN	NaN	NaN	0	NaN	201580000	6	936	106151	50	0	Q5XI83	Q5XI83	UPF0505 protein C16orf62 homolog			UPF0505 protein C16orf62 homolog
1.9124	0.482102	-0.102653	0.653306	-1.29557	-0.734186	-0.0978782	-1.1543	0.336776		8	8	8	NaN	NaN	NaN	NaN	0	NaN	1425000000	21	412	45093.2	21	0	Q5XI97	Q5XI97	Alanyl-tRNA editing protein Aarsd1	Aarsd1	Aarsd1	Alanyl-tRNA editing protein Aarsd1
-1.09574	-0.934142	-0.0439055	NaN	NaN	NaN	0.0952482	1.68152	0.297024		4	4	4	NaN	NaN	NaN	NaN	0	NaN	361340000	12	563	62992.4	21	0	Q5XIA1	Q5XIA1	Nicalin	Ncln	Ncln	Nicalin
NaN	1.10872	NaN	NaN	NaN	NaN	-0.833738	NaN	-0.274985		2	2	2	NaN	NaN	NaN	NaN	0	NaN	123090000	11	461	52307.1	22	0	Q5XIB4	Q5XIB4	Ufm1-specific protease 2	Ufsp2	Ufsp2	Ufm1-specific protease 2
0.909104	-0.154139	1.11002	-1.48785	NaN	-1.17245	-0.463087	0.227293	1.03111		7	7	7	NaN	NaN	NaN	NaN	0	NaN	3421800000	78	391	43021.4	18	0	Q5XIC0	Q5XIC0	Enoyl-CoA delta isomerase 2, mitochondrial	Eci2	Eci2	Enoyl-CoA delta isomerase 2, mitochondrial
NaN	NaN	-0.707107	NaN	NaN	NaN	NaN	NaN	0.707107		2	2	2	5	5	5	NaN	NaN	NaN	148090000	3	420	46191.1	20	0	Q5XIC1	Q5XIC1	Mannose-1-phosphate guanyltransferase alpha	Gmppa	Gmppa	Mannose-1-phosphate guanyltransferase alpha
NaN	1.19058	NaN	0.0437736	NaN	NaN	-1.0012	0.764048	-0.997204		3	3	3	NaN	NaN	NaN	NaN	0	NaN	2886200000	13	434	49619.7	24	0	Q5XIC2	Q5XIC2	Evolutionarily conserved signaling intermediate in Toll pathway, mitochondrial	Ecsit	Ecsit	Evolutionarily conserved signaling intermediate in Toll pathway, mitochondrial
1.53505	0.0279978	-0.0771213	0.968675	-1.80015	-0.523864	0.824702	-0.63121	-0.324089		4	4	4	NaN	NaN	NaN	NaN	0	NaN	2215600000	19	379	42552.6	20	0	Q5XID7	Q5XID7	Armadillo repeat-containing X-linked protein 3	Armcx3	Armcx3	Armadillo repeat-containing X-linked protein 3
-0.0325545	0.727673	0.667868	-1.91855	0.767449	-1.37233	-0.0155763	0.289249	0.886773		6	6	6	NaN	NaN	NaN	NaN	0	NaN	961000000	44	207	23747.6	15	0	Q5XIE1	Q5XIE1	Protein THEM6	Them6	Them6	Protein THEM6
0.318369	1.08615	1.50491	-0.218582	-1.44151	-0.243509	-1.4697	0.204212	0.259664		11	11	11	NaN	NaN	NaN	NaN	0	NaN	2461900000	109	385	43024.7	24	0	Q5XIE6	Q5XIE6	3-hydroxyisobutyryl-CoA hydrolase, mitochondrial	Hibch	Hibch	3-hydroxyisobutyryl-CoA hydrolase, mitochondrial
-0.505791	-0.573683	-0.701815	1.68758	NaN	1.1935	0.430129	-1.14889	-0.381027		3	3	3	NaN	NaN	NaN	NaN	0	NaN	916420000	16	266	30313.9	14	0	Q5XIE8	Q5XIE8	Integral membrane protein 2B;BRI2, membrane form;BRI2 intracellular domain;BRI2C, soluble form;Bri23 peptide	Itm2b	Itm2b	Integral membrane protein 2B
0.344013	0.276241	0.579677	-1.5684	NaN	1.23062	0.927179	-1.02603	-0.76329		3	3	3	20	20	20	NaN	0	NaN	2118800000	53	175	19740.6	11	0	Q5XIF3	Q5XIF3	NADH dehydrogenase [ubiquinone] iron-sulfur protein 4, mitochondrial	Ndufs4	Ndufs4	NADH dehydrogenase [ubiquinone] iron-sulfur protein 4, mitochondrial
-0.384482	-0.350398	0.107284	-1.68103	-0.419345	NaN	0.0824682	0.998695	1.64681		3	3	3	NaN	NaN	NaN	NaN	0	NaN	579930000	11	323	38055	10	0	Q5XIF5	Q5XIF5	Sphingolipid delta(4)-desaturase DES1	Degs1	Degs1	Sphingolipid delta(4)-desaturase DES1
-0.679658	-0.197797	1.365	-1.76763	0.417227	-0.231853	-0.755687	0.937423	0.912973		25	4	4	NaN	NaN	NaN	NaN	0	NaN	22641000000	247	448	49924.4	21	0	Q5XIF6	Q5XIF6	Tubulin alpha-4A chain	Tuba4a	Tuba4a	Tubulin alpha-4A chain
-0.75808	1.12967	0.957905	-1.95697	-0.0571805	-0.493433	1.04898	0.21692	-0.0878118		10	10	10	NaN	NaN	NaN	NaN	0	NaN	2329600000	110	247	27659.1	12	0	Q5XIG4	Q5XIG4	OCIA domain-containing protein 1	Ociad1	Ociad1	OCIA domain-containing protein 1
0.326142	0.640718	-0.359852	0.374623	-2.48988	-0.163685	0.555689	0.391999	0.724246		9	9	9	NaN	NaN	NaN	NaN	0	NaN	3456700000	109	350	38456.3	21	0	Q5XIG8	Q5XIG8	Serine-threonine kinase receptor-associated protein	Strap	Strap	Serine-threonine kinase receptor-associated protein
-0.171886	0.493076	1.03688	-2.10326	0.228232	-1.00202	-0.00715376	0.700652	0.825475		12	12	12	NaN	NaN	NaN	NaN	0	NaN	12129000000	220	299	33312.4	22	0	Q5XIH7	Q5XIH7	Prohibitin-2	Phb2	Phb2	Prohibitin-2
0.689483	-0.479922	-1.87005	1.4057	0.687607	0.869781	-0.391588	-0.346928	-0.564077		4	4	4	NaN	NaN	NaN	NaN	0	NaN	1363600000	47	224	25639.4	9	0	Q5XII0	Q5XII0	Mammalian ependymin-related protein 1	Epdr1	Epdr1	Mammalian ependymin-related protein 1
0.436394	0.889635	NaN	-1.44905	NaN	NaN	-0.142093	-0.832594	1.09771		2	2	2	NaN	NaN	NaN	NaN	0	NaN	289760000	14	273	31474.4	16	0	Q5XIJ4	Q5XIJ4	Protein FAM210A	Fam210a	Fam210a	Protein FAM210A
0.391474	0.266076	1.60025	0.201393	NaN	NaN	-0.213618	-1.674	-0.571579		4	4	4	NaN	NaN	NaN	NaN	0	NaN	331020000	13	334	36878.3	20	0	Q5XIJ6	Q5XIJ6	BRISC and BRCA1-A complex member 1	Babam1	Babam1	BRISC and BRCA1-A complex member 1
-0.515756	-0.19723	0.466569	-2.05182	1.12971	-0.658999	0.213803	1.13025	0.483463		5	5	5	NaN	NaN	NaN	NaN	0	NaN	1805800000	64	295	33865.6	19	0	Q5XIK2	Q5XIK2	Thioredoxin-related transmembrane protein 2	Tmx2	Tmx2	Thioredoxin-related transmembrane protein 2
NaN	-1.27592	NaN	NaN	-0.189411	NaN	NaN	0.370357	1.09498		2	2	2	19	19	19	NaN	NaN	NaN	88725000	14	200	23324.2	12	0	Q5XIM4	Q5XIM4	ATP synthase subunit s, mitochondrial	Atp5s	Atp5s	ATP synthase subunit s, mitochondrial
0.705561	0.815695	0.116557	-1.69831	0.598561	-1.65525	-0.144411	0.740704	0.5209		23	23	23	NaN	NaN	NaN	NaN	0	NaN	34505000000	561	535	57458.3	33	0	Q5XIM9	Q5XIM9	T-complex protein 1 subunit beta	Cct2	Cct2	T-complex protein 1 subunit beta
0.590616	1.39759	0.918871	-1.31588	-0.376292	-0.934218	1.00197	-1.01627	-0.266371		22	22	22	NaN	NaN	NaN	NaN	0	NaN	12794000000	295	739	83059.8	44	0	Q5XIN6	Q5XIN6	LETM1 and EF-hand domain-containing protein 1, mitochondrial	Letm1	Letm1	LETM1 and EF-hand domain-containing protein 1, mitochondrial
-1.11155	-0.373142	0.560275	NaN	NaN	NaN	NaN	1.43279	-0.508373		2	2	2	NaN	NaN	NaN	NaN	NaN	NaN	154850000	9	380	42608.9	20	0	Q5XIP6	Q5XIP6	Flap endonuclease 1	Fen1	Fen1	Flap endonuclease 1
-1.15265	NaN	NaN	NaN	NaN	NaN	0.51679	NaN	0.635862		2	2	2	NaN	NaN	NaN	NaN	0	NaN	291000000	8	533	58602.6	21	0	Q5XIQ4	Q5XIQ4	E3 ubiquitin-protein ligase MGRN1	Mgrn1	Mgrn1	E3 ubiquitin-protein ligase MGRN1
-1.45814	-0.045399	-0.119964	-0.793337	1.21069	NaN	1.32239	-0.116242	NaN		2	2	2	NaN	NaN	NaN	NaN	0	NaN	183280000	13	409	45546.5	20	0	Q5XIR9	Q5XIR9	Ubiquitin-associated domain-containing protein 1	Ubac1	Ubac1	Ubiquitin-associated domain-containing protein 1
0.478443	1.19199	0.375795	0.331504	-0.228286	-0.851121	-1.62718	-0.9803	1.30915		8	8	6	NaN	NaN	NaN	NaN	0	NaN	5777900000	152	281	31966.2	15	0	Q5XIT1	Q5XIT1	Microtubule-associated protein RP/EB family member 3	Mapre3	Mapre3	Microtubule-associated protein RP/EB family member 3
-0.17282	0.566135	0.0805932	-1.05802	1.26809	-1.77392	-0.429095	0.295267	1.22376		14	14	14	NaN	NaN	NaN	NaN	0	NaN	1977500000	67	563	61517.2	29	0	Q5XIT9	Q5XIT9	Methylcrotonoyl-CoA carboxylase beta chain, mitochondrial	Mccc2	Mccc2	Methylcrotonoyl-CoA carboxylase beta chain, mitochondrial
0.0459382	-0.358992	0.343225	0.872049	-2.16556	1.2775	0.628729	-0.504639	-0.13825		5	4	4	24	NaN	NaN	NaN	0	NaN	1479700000	45	217	23403.2	12	0	Q5XIU9	Q5XIU9	Membrane-associated progesterone receptor component 2	Pgrmc2	Pgrmc2	Membrane-associated progesterone receptor component 2
0.424915	0.567369	1.10938	-0.888167	-1.50755	-1.31252	0.0344939	0.43557	1.13651		18	18	18	NaN	NaN	NaN	NaN	0	NaN	13932000000	234	475	51414.5	24	0	Q60587	Q60587	Trifunctional enzyme subunit beta, mitochondrial;3-ketoacyl-CoA thiolase	Hadhb	Hadhb	Trifunctional enzyme subunit beta, mitochondrial
0.182289	-1.25494	0.120094	1.29215	0.989032	-1.64138	-0.691365	0.338613	0.665499		3	3	2	19	19	19	NaN	0	NaN	6328400000	75	142	16393.9	4	0	Q62625	Q62625	Microtubule-associated proteins 1A/1B light chain 3B	Map1lc3b	Map1lc3b	Microtubule-associated proteins 1A/1B light chain 3B
-1.34778	0.119814	0.0908869	0.0687089	-0.0283104	-1.68053	0.588071	0.551816	1.63733		8	4	4	56	NaN	NaN	NaN	0	NaN	3574400000	66	184	20797.8	10	0	Q62636	Q62636	Ras-related protein Rap-1b	Rap1b	Rap1b	Ras-related protein Rap-1b
-1.3815	0.211485	1.36312	-0.755616	NaN	0.136634	-1.10313	0.438037	1.09097		5	5	5	NaN	NaN	NaN	NaN	0	NaN	480260000	25	1171	133557	60	0	Q62638	Q62638	Golgi apparatus protein 1	Glg1	Glg1	Golgi apparatus protein 1
0.788898	0.642035	1.39952	-0.517277	NaN	-1.78383	-0.700618	-0.0750057	0.246283		4	4	4	NaN	NaN	NaN	NaN	0	NaN	1222800000	48	184	20479.5	9	0	Q62639	Q62639	GTP-binding protein Rheb	Rheb	Rheb	GTP-binding protein Rheb
NaN	NaN	NaN	NaN	NaN	NaN	0.707107	NaN	-0.707107		3	3	3	NaN	NaN	NaN	NaN	0	NaN	98578000	3	1009	112125	46	0	Q62640	Q62640	Glutamate receptor ionotropic, delta-1	Grid1	Grid1	Glutamate receptor ionotropic, delta-1
0.707074	-0.403445	-0.65583	0.548096	0.064651	1.10049	0.541142	-2.23357	0.331395		9	9	9	37	37	37	NaN	0	NaN	5571200000	110	327	36171.7	20	0	Q62651	Q62651	Delta(3,5)-Delta(2,4)-dienoyl-CoA isomerase, mitochondrial	Ech1	Ech1	Delta(3,5)-Delta(2,4)-dienoyl-CoA isomerase, mitochondrial
-0.410013	-0.232817	0.555081	1.05578	-2.27995	0.686417	0.145525	-0.284018	0.764		11	11	11	NaN	NaN	NaN	NaN	0	NaN	8503600000	228	2316	255342	87	0	Q62656	Q62656	Receptor-type tyrosine-protein phosphatase zeta	Ptprz1	Ptprz1	Receptor-type tyrosine-protein phosphatase zeta
0.00893323	0.203816	-0.833838	1.9269	-0.912032	1.05501	0.293998	-0.881416	-0.861374		5	5	5	NaN	NaN	NaN	NaN	0	NaN	2873600000	91	108	11922.6	3	0	Q62658	Q62658	Peptidyl-prolyl cis-trans isomerase FKBP1A	Fkbp1a	Fkbp1a	Peptidyl-prolyl cis-trans isomerase FKBP1A
-0.163522	-0.289947	-0.107376	-0.945476	2.00491	-1.17815	-0.73466	0.841845	0.572376		20	20	20	NaN	NaN	NaN	NaN	0	NaN	2703400000	123	861	95798.2	45	0	Q62667	Q62667	Major vault protein	Mvp	Mvp	Major vault protein
1.94223	1.11755	-0.0961405	-0.413823	-0.517679	-1.51192	-0.466284	0.0861311	-0.140056		28	28	28	36	36	36	NaN	0	NaN	11087000000	326	1096	122772	54	0	Q62688	Q62688	Inactive phospholipase C-like protein 1	Plcl1	Plcl1	Inactive phospholipase C-like protein 1
0.00670078	-0.354849	-0.671779	1.80852	-1.37483	0.924658	0.755192	-0.892166	-0.201452		15	15	11	25	25	NaN	NaN	0	NaN	5003900000	84	911	100571	39	0	Q62696	Q62696	Disks large homolog 1	Dlg1	Dlg1	Disks large homolog 1
-0.292184	-0.19551	1.40829	-0.432019	-0.0277516	-2.08776	-0.00912177	0.752653	0.883407		14	13	13	NaN	NaN	NaN	NaN	0	NaN	5350900000	112	497	54744.8	28	0	Q62698	Q62698	Cytoplasmic dynein 1 light intermediate chain 2	Dync1li2	Dync1li2	Cytoplasmic dynein 1 light intermediate chain 2
-0.432608	0.859583	0.267307	-0.970766	-0.936431	1.17154	1.39103	0.019785	-1.36944		11	11	11	NaN	NaN	NaN	NaN	0	NaN	1648500000	54	320	37433	14	0	Q62703	Q62703	Reticulocalbin-2	Rcn2	Rcn2	Reticulocalbin-2
0.85117	0.663977	1.32904	-1.40524	-0.268457	-1.14828	-1.06576	0.415466	0.62809		33	33	33	NaN	NaN	NaN	NaN	0	NaN	23944000000	575	1289	146266	65	0	Q62717	Q62717	Calcium-dependent secretion activator 1	Cadps	Cadps	Calcium-dependent secretion activator 1
-0.211106	-0.367273	-0.819409	1.79869	-0.573307	1.42828	0.35092	-1.05945	-0.547339		5	5	5	NaN	NaN	NaN	NaN	0	NaN	3893800000	100	344	37998.4	18	0	Q62718	Q62718	Neurotrimin	Ntm	Ntm	Neurotrimin
0.567899	-1.12133	-0.882561	1.137	NaN	0.432028	1.01862	-1.43053	0.278874		2	2	2	NaN	NaN	NaN	NaN	0	NaN	229290000	9	507	55142.6	20	0	Q62720	Q62720	Zinc transporter 1	Slc30a1	Slc30a1	Zinc transporter 1
-0.123615	-0.847664	-0.922495	0.866874	NaN	NaN	1.547	NaN	-0.520101		4	4	4	NaN	NaN	NaN	NaN	0	NaN	456540000	15	452	50277.6	23	0	Q62733	Q62733	Lamina-associated polypeptide 2, isoform beta	Tmpo	Tmpo	Lamina-associated polypeptide 2, isoform beta
0.921858	-1.01646	0.298294	0.941647	-1.1256	-0.359402	1.62197	-1.02338	-0.258921		3	3	3	NaN	NaN	NaN	NaN	0	NaN	24106000000	283	236	25888.5	8	0	Q62745	Q62745	CD81 antigen	Cd81	Cd81	CD81 antigen
0.936822	-1.31946	NaN	NaN	NaN	NaN	NaN	0.583862	-0.201221		4	4	1	NaN	NaN	NaN	NaN	NaN	NaN	416820000	8	448	51428.5	25	0	Q62763	Q62763	Casein kinase I isoform gamma-3	Csnk1g3	Csnk1g3	Casein kinase I isoform gamma-3
0.851161	0.953163	1.21749	0.325058	-0.324125	-1.85663	-1.07832	-0.217543	0.129743		12	12	12	NaN	NaN	NaN	NaN	0	NaN	2846500000	88	939	105589	44	0	Q62784	Q62784	Type I inositol 3,4-bisphosphate 4-phosphatase	Inpp4a	Inpp4a	Type I inositol 3,4-bisphosphate 4-phosphatase
-1.78312	-1.07329	-0.0689624	0.179806	1.51267	1.06476	-0.276332	0.353451	0.0910096		51	44	41	33	NaN	NaN	NaN	0	NaN	8186200000	257	1961	226338	104	0	Q62812	Q62812	Myosin-9	Myh9	Myh9	Myosin-9
0.15069	-0.726884	-0.61353	1.34768	-0.656399	1.87699	0.185081	-0.932778	-0.630854		6	6	6	24	24	24	NaN	0	NaN	6571700000	294	338	37324.4	20	0	Q62813	Q62813	Limbic system-associated membrane protein	Lsamp	Lsamp	Limbic system-associated membrane protein
NaN	NaN	NaN	NaN	NaN	-0.552279	-0.602064	1.15434	NaN		3	3	3	NaN	NaN	NaN	NaN	NaN	NaN	293360000	7	351	38875.4	16	0	Q62818	Q62818	Translation initiation factor eIF-2B subunit beta	Eif2b2	Eif2b2	Translation initiation factor eIF-2B subunit beta
1.37247	-0.436181	-1.39653	NaN	NaN	NaN	0.756691	-0.572056	0.275609		7	7	7	NaN	NaN	NaN	NaN	0	NaN	907790000	15	975	110553	55	0	Q62824	Q62824	Exocyst complex component 4	Exoc4	Exoc4	Exocyst complex component 4
NaN	NaN	1.05321	NaN	NaN	NaN	0.60407	-1.10484	-0.55244		3	3	3	NaN	NaN	NaN	NaN	NaN	NaN	228230000	9	755	86496.6	33	0	Q62825	Q62825	Exocyst complex component 3	Exoc3	Exoc3	Exocyst complex component 3
-0.438285	0.00742847	1.30457	-1.00033	-1.19534	-1.11551	0.2998	1.23818	0.899494		10	10	10	NaN	NaN	NaN	NaN	0	NaN	3126600000	83	690	73782.1	47	0	Q62826	Q62826	Heterogeneous nuclear ribonucleoprotein M	Hnrnpm	Hnrnpm	Heterogeneous nuclear ribonucleoprotein M
1.79189	1.02904	-0.899395	-0.897896	-0.627937	0.838712	0.158445	-0.80177	-0.591092		14	6	6	34	NaN	NaN	NaN	0	NaN	1581100000	70	544	60710.7	26	0	Q62829	Q62829	Serine/threonine-protein kinase PAK 3	Pak3	Pak3	Serine/threonine-protein kinase PAK 3
-0.772609	-1.31599	NaN	NaN	NaN	NaN	0.686707	0.371514	1.03037		8	6	5	NaN	14	NaN	NaN	0	NaN	1270400000	8	537	60701.9	29	0	Q62844	Q62844	Tyrosine-protein kinase Fyn	Fyn	Fyn	Tyrosine-protein kinase Fyn
0.863869	1.14081	0.982368	-1.27427	-1.01346	-1.32318	-0.336186	0.556525	0.403525		13	13	13	NaN	NaN	NaN	NaN	0	NaN	8839200000	186	705	78804	30	0	Q62847	Q62847	Gamma-adducin	Add3	Add3	Gamma-adducin
0.687585	0.901379	0.295917	-1.08286	-2.12112	-0.241505	0.378892	0.424558	0.757158		2	2	2	NaN	NaN	NaN	NaN	0	NaN	711300000	30	415	45442.5	19	0	Q62848	Q62848	ADP-ribosylation factor GTPase-activating protein 1	Arfgap1	Arfgap1	ADP-ribosylation factor GTPase-activating protein 1
1.28599	0.331978	1.10089	0.444992	-1.73967	-0.743061	0.356735	0.0203408	-1.05819		20	20	16	NaN	NaN	NaN	NaN	0	NaN	3028000000	99	1388	160387	80	0	Q62868	Q62868	Rho-associated protein kinase 2	Rock2	Rock2	Rho-associated protein kinase 2
0.332088	0.27922	0.543856	-1.17694	-0.482013	-1.60088	1.52077	0.944796	-0.360888		15	15	15	NaN	NaN	NaN	NaN	0	NaN	6350900000	87	638	71178.1	20	0	Q62871	Q62871	Cytoplasmic dynein 1 intermediate chain 2	Dync1i2	Dync1i2	Cytoplasmic dynein 1 intermediate chain 2
0.334813	-0.577155	-1.31084	1.49216	NaN	0.85468	0.768871	-0.597463	-0.965066		5	5	5	NaN	NaN	NaN	NaN	0	NaN	858920000	34	221	24576.7	11	0	Q62881	Q62881	Nucleolar protein 3	Nol3	Nol3	Nucleolar protein 3
-0.730027	0.279792	0.860687	-1.17704	-0.174163	-0.559192	-1.12413	1.63836	0.98572		5	5	4	NaN	NaN	NaN	NaN	0	NaN	1036800000	27	836	90961	29	0	Q62888	Q62888	Neuroligin-2	Nlgn2	Nlgn2	Neuroligin-2
NaN	-1.16457	NaN	-0.168593	-0.00571604	2.09835	-0.185206	-0.367883	-0.206381		5	5	5	NaN	NaN	NaN	NaN	0	NaN	868770000	18	517	57957.1	17	0	Q62902	Q62902	Protein ERGIC-53	Lman1	Lman1	Protein ERGIC-53
-0.000373106	-0.41097	-0.28678	-1.06601	NaN	-1.38064	0.538702	1.40384	1.20222		5	5	5	NaN	NaN	NaN	NaN	0	NaN	693900000	20	334	37371.9	16	0	Q62904	Q62904	3-keto-steroid reductase	Hsd17b7	Hsd17b7	3-keto-steroid reductase
1.16434	0.914268	1.06977	-0.542524	0.614766	-0.756918	-1.78169	-0.41789	-0.264126		37	37	37	31	31	31	NaN	0	NaN	25297000000	562	1574	172881	85	0	Q62910	Q62910	Synaptojanin-1	Synj1	Synj1	Synaptojanin-1
0.990033	0.780096	0.612689	-0.849668	-0.746284	-1.91565	-0.254284	0.509603	0.873468		16	16	16	NaN	NaN	NaN	NaN	0	NaN	3067800000	147	909	103259	49	0	Q62915	Q62915	Peripheral plasma membrane protein CASK	Cask	Cask	Peripheral plasma membrane protein CASK
-1.17447	-0.906363	-1.15756	-0.452909	1.63851	0.511689	0.220868	1.10013	0.220103		10	10	10	22	22	22	NaN	0	NaN	1578700000	74	554	62280.7	27	0	Q62930	Q62930	Complement component C9	C9	C9	Complement component C9
-2.03228	-0.49598	0.772345	0.275112	NaN	0.0790504	-0.409056	1.16859	0.642216		6	6	6	NaN	NaN	NaN	NaN	0	NaN	463020000	19	887	102395	42	0	Q62940	Q62940	E3 ubiquitin-protein ligase NEDD4	Nedd4	Nedd4	E3 ubiquitin-protein ligase NEDD4
0.456351	0.921192	0.330581	-1.82664	1.47559	-0.777721	-0.80355	0.260828	-0.0366302		19	16	16	NaN	NaN	NaN	NaN	0	NaN	12509000000	237	572	62195.8	34	0	Q62950	Q62950	Dihydropyrimidinase-related protein 1	Crmp1	Crmp1	Dihydropyrimidinase-related protein 1
-0.28946	0.305387	0.767006	-2.05229	1.16874	-0.812267	-0.362455	0.475834	0.799504		17	17	17	NaN	NaN	NaN	NaN	0	NaN	5118600000	165	564	61085.6	30	0	Q62951	Q62951	Dihydropyrimidinase-related protein 4	Dpysl4	Dpysl4	Dihydropyrimidinase-related protein 4
0.484817	0.939386	0.0384407	-1.53556	1.33993	-1.54326	-0.285073	0.512201	0.0491214		23	20	19	NaN	NaN	NaN	NaN	0	NaN	39900000000	560	570	61967.3	29	0	Q62952	Q62952	Dihydropyrimidinase-related protein 3	Dpysl3	Dpysl3	Dihydropyrimidinase-related protein 3
1.30019	1.08536	0.284313	-1.44047	-0.272957	-1.62076	0.440386	0.278314	-0.0543645		12	12	12	NaN	NaN	NaN	NaN	0	NaN	9545800000	207	401	43903	19	0	Q62967	Q62967	Diphosphomevalonate decarboxylase	Mvd	Mvd	Diphosphomevalonate decarboxylase
NaN	NaN	NaN	NaN	0.707107	NaN	NaN	-0.707107	NaN		2	2	1	NaN	NaN	NaN	NaN	0	NaN	115240000	3	436	50244	22	0	Q62975	Q62975	Protein Z-dependent protease inhibitor	Serpina10	Serpina10	Protein Z-dependent protease inhibitor
-0.929738	0.357263	1.51751	-1.48657	0.411681	-1.24217	0.135651	0.622559	0.613814		7	7	7	NaN	NaN	NaN	NaN	0	NaN	603660000	30	637	72262.8	33	0	Q62991	Q62991	Sec1 family domain-containing protein 1	Scfd1	Scfd1	Sec1 family domain-containing protein 1
0.644718	0.233202	0.879551	0.444676	-2.3462	0.250496	-0.823847	0.192632	0.52477		14	14	14	NaN	NaN	NaN	NaN	0	NaN	3589400000	93	353	40522.4	22	0	Q63009	Q63009	Protein arginine N-methyltransferase 1	Prmt1	Prmt1	Protein arginine N-methyltransferase 1
1.08981	0.0256577	-0.0823156	0.554854	-0.902103	-2.06765	0.650314	-0.233307	0.964736		2	2	2	NaN	NaN	NaN	NaN	0	NaN	725830000	36	512	55903.4	18	0	Q63016	Q63016	Large neutral amino acids transporter small subunit 1	Slc7a5	Slc7a5	Large neutral amino acids transporter small subunit 1
0.370552	0.885593	0.582386	-1.76192	-0.0521672	-1.39611	1.23307	-0.207248	0.345852		18	18	17	NaN	NaN	NaN	NaN	0	NaN	20113000000	410	735	80355.3	27	0	Q63028	Q63028	Alpha-adducin	Add1	Add1	Alpha-adducin
-1.0435	-1.17558	-1.11981	0.441055	1.6608	0.859797	-0.177448	0.723299	-0.168606		50	50	50	NaN	NaN	NaN	NaN	0	NaN	97333000000	1028	1500	167125	76	0	Q63041	Q63041	Alpha-1-macroglobulin;Alpha-1-macroglobulin 45 kDa subunit	A1m	A1m	Alpha-1-macroglobulin
0.913193	0.986755	1.29569	-0.644067	-1.91921	0.185803	-0.254359	-0.562273	-0.00152694		11	11	11	NaN	NaN	NaN	NaN	0	NaN	3627500000	115	524	57477	30	0	Q63060	Q63060	Glycerol kinase	Gk	Gk	Glycerol kinase
0.261028	1.10069	0.776144	-1.3374	NaN	-1.69651	-0.00504944	0.300282	0.600813		4	3	3	NaN	NaN	NaN	NaN	0	NaN	283270000	18	434	49081	24	0	Q63065	Q63065	[Pyruvate dehydrogenase (acetyl-transferring)] kinase isozyme 1, mitochondrial	Pdk1	Pdk1	[Pyruvate dehydrogenase (acetyl-transferring)] kinase isozyme 1, mitochondrial
-0.801698	-0.918625	-0.497968	-1.05052	1.5219	0.0213659	0.695966	1.47157	-0.441987		9	9	9	NaN	NaN	NaN	NaN	0	NaN	9180000000	198	440	48173.4	17	0	Q63081	Q63081	Protein disulfide-isomerase A6	Pdia6	Pdia6	Protein disulfide-isomerase A6
-0.684127	-0.60208	0.509696	1.37273	-1.62924	0.776446	-0.185762	1.12551	-0.683175		6	6	6	NaN	NaN	NaN	NaN	0	NaN	498330000	23	459	53506.8	27	0	Q63083	Q63083	Nucleobindin-1	Nucb1	Nucb1	Nucleobindin-1
0.277477	-0.628944	2.00689	-1.33284	NaN	0.216448	-0.538159	-0.440265	0.439391		7	7	7	NaN	NaN	NaN	NaN	0	NaN	681550000	36	504	54105.5	23	0	Q63092	Q63092	CaM kinase-like vesicle-associated protein	Camkv	Camkv	CaM kinase-like vesicle-associated protein
0.139586	0.739056	-0.486666	-1.77849	1.55863	-0.159749	0.209597	0.758217	-0.980184		10	10	10	NaN	NaN	NaN	NaN	0	NaN	5251400000	168	643	72754.2	20	0	Q63100	Q63100	Cytoplasmic dynein 1 intermediate chain 1	Dync1i1	Dync1i1	Cytoplasmic dynein 1 intermediate chain 1
0.711632	-0.0907493	-1.09417	0.538702	-1.64177	0.175814	1.66832	-0.609534	0.341761		3	3	3	NaN	NaN	NaN	NaN	0	NaN	645460000	22	464	53329	10	0	Q63118	Q63118	Calcitonin gene-related peptide type 1 receptor	Calcrl	Calcrl	Calcitonin gene-related peptide type 1 receptor
-0.143748	-0.778303	-0.685663	0.306608	2.45735	-0.765562	-0.199128	-0.347549	0.155994		6	6	6	NaN	NaN	NaN	NaN	0	NaN	1139000000	39	559	61680.2	21	0	Q63135	Q63135	Complement component receptor 1-like protein	Cr1l	Cr1l	Complement component receptor 1-like protein
-0.00794976	-0.189405	0.971408	NaN	-1.08832	-1.74079	0.186297	0.823013	1.04575		10	10	10	NaN	NaN	NaN	NaN	0	NaN	1707500000	58	720	80458.2	32	0	Q63151	Q63151	Long-chain-fatty-acid--CoA ligase 3	Acsl3	Acsl3	Long-chain-fatty-acid--CoA ligase 3
-0.39201	1.03066	1.47466	-1.42373	-1.42798	0.368813	-0.30831	0.541991	0.135915		2	2	2	NaN	NaN	NaN	NaN	0	NaN	452130000	29	345	38708.2	15	0	Q63159	Q63159	Ubiquinone biosynthesis O-methyltransferase, mitochondrial	Coq3	Coq3	Ubiquinone biosynthesis O-methyltransferase, mitochondrial
1.2136	-0.824018	-1.18562	NaN	NaN	0.325248	1.38295	-0.519684	-0.392482		3	3	3	NaN	NaN	NaN	NaN	0	NaN	325420000	10	460	51855.9	17	0	Q63175	Q63175	Serine incorporator 5	Serinc5	Serinc5	Serine incorporator 5
1.2002	0.119762	-0.363453	0.263113	-1.1686	-0.205322	1.76862	-1.30967	-0.304651		33	33	33	NaN	NaN	NaN	NaN	0	NaN	70238000000	1294	1021	113495	52	0	Q63198	Q63198	Contactin-1	Cntn1	Cntn1	Contactin-1
-1.60626	0.0166019	-0.752966	1.11026	0.0151538	0.804701	1.32149	0.183001	-1.09198		3	3	3	NaN	NaN	NaN	NaN	0	NaN	927720000	36	142	16736.2	9	0	Q63228	Q63228	Glia maturation factor beta	Gmfb	Gmfb	Glia maturation factor beta
-0.635102	1.63501	-0.230818	1.01491	NaN	NaN	-0.543407	-1.24289	0.00229968		4	4	4	NaN	NaN	NaN	NaN	0	NaN	462030000	21	983	106228	43	0	Q63259	Q63259	Receptor-type tyrosine-protein phosphatase-like N	Ptprn	Ptprn	Receptor-type tyrosine-protein phosphatase-like N
0.863532	1.09079	0.26839	-1.07379	0.874669	-1.32999	-1.40899	0.537086	0.178303		22	22	22	NaN	NaN	NaN	NaN	0	NaN	12553000000	281	889	98127.5	42	0	Q63270;Q62751	Q63270	Cytoplasmic aconitate hydratase	Aco1	Aco1	Cytoplasmic aconitate hydratase
-1.0752	-1.85173	-0.434334	0.873647	0.360637	0.592419	0.869576	1.04132	-0.376334		3	3	3	NaN	NaN	NaN	NaN	0	NaN	7409200000	183	170	19103.2	5	0	Q63327	Q63327	Myelin-associated oligodendrocyte basic protein	Mobp	Mobp	Myelin-associated oligodendrocyte basic protein
-0.0171768	-1.96299	0.516234	0.39056	1.86559	-0.05413	-0.252484	-0.419355	-0.0662445		10	10	10	NaN	NaN	NaN	NaN	0	NaN	63727000000	540	245	27881.6	13	0	Q63345	Q63345	Myelin-oligodendrocyte glycoprotein	Mog	Mog	Myelin-oligodendrocyte glycoprotein
-0.00143781	0.281804	0.923755	-2.26104	0.392227	-0.80893	0.0944838	0.99521	0.383925		19	19	19	NaN	NaN	NaN	NaN	0	NaN	7318500000	179	433	48574.8	27	0	Q63347	Q63347	26S protease regulatory subunit 7	Psmc2	Psmc2	26S protease regulatory subunit 7
-0.507394	-0.428875	0.159221	-0.594226	-0.842529	-1.06201	0.014018	1.73715	1.52464		12	12	12	13	13	13	NaN	0	NaN	997220000	29	1107	126827	58	0	Q63356	Q63356	Unconventional myosin-Ie	Myo1e	Myo1e	Unconventional myosin-Ie
-0.468294	-0.90283	0.576331	-2.04165	0.62852	0.0189861	0.173706	0.940779	1.07446		38	38	38	NaN	NaN	NaN	NaN	0	101	11842000000	312	1006	116095	62	0	Q63357	Q63357	Unconventional myosin-Id	Myo1d	Myo1d	Unconventional myosin-Id
0.462377	0.555905	-0.988144	-0.904142	0.283856	-1.73431	0.354061	0.471257	1.49914		5	5	5	NaN	NaN	NaN	NaN	0	NaN	4272200000	107	116	13411.8	5	0	Q63362	Q63362	NADH dehydrogenase [ubiquinone] 1 alpha subcomplex subunit 5	Ndufa5	Ndufa5	NADH dehydrogenase [ubiquinone] 1 alpha subcomplex subunit 5
-0.523417	-1.5826	0.659797	-0.965734	1.06779	-0.533598	-0.288127	1.08299	1.08289		7	6	6	NaN	6	6	NaN	0	NaN	352670000	17	1530	167923	65	0	Q63372	Q63372	Neurexin-1	Nrxn1	Nrxn1	Neurexin-1
0.536885	-0.840806	0.149119	1.71691	-1.82752	0.255362	-0.303671	-0.337263	0.650978		9	9	9	NaN	NaN	NaN	NaN	0	NaN	15448000000	439	279	31829.7	11	0	Q63377	Q63377	Sodium/potassium-transporting ATPase subunit beta-3	Atp1b3	Atp1b3	Sodium/potassium-transporting ATPase subunit beta-3
-0.253449	0.0338758	0.690986	-0.742401	-0.380543	-0.577851	-1.4665	1.91485	0.781021		10	10	10	NaN	NaN	NaN	NaN	0	NaN	3461700000	92	427.5	49072.4	19	0	Q63413;Q5U216	Q63413;Q5U216	Spliceosome RNA helicase Ddx39b;ATP-dependent RNA helicase DDX39A	Ddx39b;Ddx39a	Ddx39b;Ddx39a	Spliceosome RNA helicase Ddx39b;ATP-dependent RNA helicase DDX39A
-1.04813	-0.670681	-0.543043	-0.258459	1.96173	1.00626	-0.994966	0.484917	0.062371		11	11	11	NaN	NaN	NaN	NaN	0	NaN	5464800000	145	887	99097.6	38	0	Q63416;CON__Q0V8M9	Q63416	Inter-alpha-trypsin inhibitor heavy chain H3	Itih3	Itih3	Inter-alpha-trypsin inhibitor heavy chain H3
0.732409	-1.56394	-0.609358	0.664475	-0.813945	NaN	1.51662	-0.309154	0.382889		4	4	4	NaN	NaN	NaN	NaN	NaN	NaN	539520000	11	729	81320	30	0	Q63424	Q63424	Solute carrier family 15 member 2	Slc15a2	Slc15a2	Solute carrier family 15 member 2
-0.0648401	-0.972337	0.618762	1.93502	0.128623	0.380502	-0.0553828	-1.62458	-0.345766		33	33	33	NaN	NaN	NaN	NaN	0	NaN	14848000000	345	1383	146400	60	0	Q63425	Q63425	Periaxin	Prx	Prx	Periaxin
NaN	NaN	NaN	NaN	NaN	NaN	NaN	0.707107	-0.707107		2	2	2	NaN	NaN	NaN	NaN	0	NaN	441700000	3	700	78446	42	0	Q63448	Q63448	Peroxisomal acyl-coenzyme A oxidase 3	Acox3	Acox3	Peroxisomal acyl-coenzyme A oxidase 3
0.534214	-0.102457	-0.0912081	1.9386	-0.214522	0.704652	-0.239963	-1.52805	-1.00127		10	10	10	NaN	NaN	NaN	NaN	0	NaN	3379400000	116	374	41638.4	15	0	Q63450	Q63450	Calcium/calmodulin-dependent protein kinase type 1	Camk1	Camk1	Calcium/calmodulin-dependent protein kinase type 1
-0.292329	0.904863	0.530456	0.232976	-0.921767	-1.04347	-1.17248	-0.0925301	1.85428		8	8	7	NaN	NaN	NaN	NaN	0	NaN	2194200000	64	356	39435.8	21	0	Q63468	Q63468	Phosphoribosyl pyrophosphate synthase-associated protein 1	Prpsap1	Prpsap1	Phosphoribosyl pyrophosphate synthase-associated protein 1
-0.157687	-0.387055	0.00566829	2.16651	0.484112	0.540462	-0.496841	-1.21145	-0.943715		6	6	6	7	7	7	NaN	0	NaN	563600000	12	1004	111863	51	0	Q63475	Q63475	Receptor-type tyrosine-protein phosphatase N2	Ptprn2	Ptprn2	Receptor-type tyrosine-protein phosphatase N2
NaN	NaN	0.466337	NaN	NaN	NaN	NaN	-1.14799	0.681653		2	2	2	NaN	NaN	NaN	NaN	0	NaN	285800000	16	343.5	39878.8	15.5	0	Q63486;Q63487	Q63486;Q63487	Ras-related GTP-binding protein A;Ras-related GTP-binding protein B	Rraga;RragB	Rraga;RragB	Ras-related GTP-binding protein A;Ras-related GTP-binding protein B
0.19564	-0.431565	NaN	NaN	NaN	NaN	NaN	-1.05414	1.29006		2	2	2	NaN	NaN	NaN	NaN	0	NaN	321260000	4	656	70747.7	18	0	Q63488	Q63488	Sodium-dependent phosphate transporter 2	Slc20a2	Slc20a2	Sodium-dependent phosphate transporter 2
NaN	NaN	NaN	NaN	1.58591	-0.753929	-0.681366	0.394202	-0.544817		5	5	5	NaN	NaN	NaN	NaN	0	NaN	247820000	16	558	62266	29	0	Q63514	Q63514	C4b-binding protein alpha chain	C4bpa	C4bpa	C4b-binding protein alpha chain
0.870779	0.404918	-0.147481	1.48651	-1.88868	0.0768959	0.536973	-0.87885	-0.461074		9	9	9	NaN	NaN	NaN	NaN	0	NaN	2682700000	81	332	38412.1	21	0	Q63525	Q63525	Nuclear migration protein nudC	Nudc	Nudc	Nuclear migration protein nudC
0.113072	-0.0819078	1.38816	-1.39571	NaN	0.993457	-0.925591	-0.838729	0.74725		7	7	7	NaN	NaN	NaN	NaN	0	NaN	2282100000	53	735	82883.2	44	0	Q63531;Q810W7	Q63531	Ribosomal protein S6 kinase alpha-1	Rps6ka1	Rps6ka1	Ribosomal protein S6 kinase alpha-1
0.706998	0.90665	1.4576	-1.5844	-0.703255	-0.926219	-0.589405	0.171784	0.560242		15	14	14	NaN	NaN	NaN	NaN	0	NaN	34360000000	513	586	63456.7	28	0	Q63537	Q63537	Synapsin-2	Syn2	Syn2	Synapsin-2
-0.159161	-0.40333	-1.27261	1.55219	-1.47402	0.82652	0.639503	0.633312	-0.342409		4	4	4	48	48	48	NaN	0	NaN	1103000000	82	123	12976.4	8	0	Q63544	Q63544	Gamma-synuclein	Sncg	Sncg	Gamma-synuclein
NaN	NaN	NaN	-0.707107	NaN	NaN	NaN	0.707107	NaN		9	8	8	NaN	NaN	NaN	NaN	0	NaN	675420000	7	412	46095	25	0	Q63556	Q63556	Serine protease inhibitor A3M	Serpina3m	Serpina3m	Serine protease inhibitor A3M
0.270437	-0.183301	-1.58873	0.910287	NaN	1.15647	0.909651	-0.357846	-1.11698		9	9	9	21	21	21	NaN	0	NaN	1069000000	40	952	100485	66	0	Q63560	Q63560	Microtubule-associated protein 6	Map6	Map6	Microtubule-associated protein 6
-0.659554	-0.430095	0.612972	-0.704341	0.401541	1.58371	-1.7369	0.0264289	0.906237		4	3	3	NaN	NaN	NaN	NaN	0	NaN	876640000	32	683	77502.4	25	0	Q63564	Q63564	Synaptic vesicle glycoprotein 2B	Sv2b	Sv2b	Synaptic vesicle glycoprotein 2B
0.426369	0.320488	-0.875013	1.74294	-1.24301	-0.115526	0.290712	0.755954	-1.30292		16	16	16	NaN	NaN	NaN	NaN	0	NaN	5010100000	181	439	49160.5	27	0	Q63569	Q63569	26S protease regulatory subunit 6A	Psmc3	Psmc3	26S protease regulatory subunit 6A
-0.296324	0.643617	0.418976	-1.54806	1.04034	-1.69833	0.422465	0.871533	0.14578		11	11	11	NaN	NaN	NaN	NaN	0	NaN	2377500000	75	418	47408.3	25	0	Q63570	Q63570	26S protease regulatory subunit 6B	Psmc4	Psmc4	26S protease regulatory subunit 6B
-0.274514	0.240223	-0.290568	-1.80732	1.06342	-0.935018	-0.177913	1.31383	0.867863		4	4	4	NaN	NaN	NaN	NaN	0	NaN	2198100000	88	219	24857.7	9	0	Q63584	Q63584	Transmembrane emp24 domain-containing protein 10	Tmed10	Tmed10	Transmembrane emp24 domain-containing protein 10
1.24524	1.03178	0.777571	0.296553	-0.110261	0.281047	-0.623136	-1.37432	-1.52448		26	26	26	NaN	NaN	NaN	NaN	0	NaN	30465000000	555	630	70679.9	36	0	Q63598	Q63598	Plastin-3	Pls3	Pls3	Plastin-3
NaN	-0.159827	NaN	-1.54755	NaN	NaN	-0.0584386	0.79056	0.97526		5	5	5	NaN	NaN	NaN	NaN	0	NaN	462770000	14	720	82454.7	41	0	Q63603	Q63603	Dedicator of cytokinesis protein 9	Dock9	Dock9	Dedicator of cytokinesis protein 9
1.04391	0.307325	-0.496152	1.12447	NaN	-0.259936	0.715225	-1.83462	-0.600215		3	3	3	6	6	6	NaN	0	NaN	522490000	24	821	92186.2	35	0	Q63604	Q63604	BDNF/NT-3 growth factors receptor	Ntrk2	Ntrk2	BDNF/NT-3 growth factors receptor
-0.440638	-0.672015	-0.485939	1.90113	-0.421719	1.49677	-0.0952833	-0.284495	-0.997808		13	13	10	NaN	NaN	NaN	NaN	0	NaN	13002000000	203	248	29006.6	16	0	Q63610	Q63610	Tropomyosin alpha-3 chain	Tpm3	Tpm3	Tropomyosin alpha-3 chain
-1.71397	-0.681134	0.289294	NaN	NaN	NaN	0.838549	0.568229	0.699028		3	3	3	NaN	NaN	NaN	NaN	0	NaN	241440000	21	597	67513.8	36	0	Q63615	Q63615	Vacuolar protein sorting-associated protein 33A	Vps33a	Vps33a	Vacuolar protein sorting-associated protein 33A
-0.315189	-0.343674	0.611913	-2.0013	NaN	NaN	0.629507	0.699241	0.719503		4	4	4	7	7	7	NaN	0	NaN	379820000	21	617	70693.5	36	0	Q63616	Q63616	Vacuolar protein sorting-associated protein 33B	Vps33b	Vps33b	Vacuolar protein sorting-associated protein 33B
0.616772	-0.478568	-1.22377	0.546935	-1.17454	1.82239	0.476303	0.204678	-0.7902		23	23	23	NaN	NaN	NaN	NaN	0	NaN	8836500000	341	999	111289	48	0	Q63617	Q63617	Hypoxia up-regulated protein 1	Hyou1	Hyou1	Hypoxia up-regulated protein 1
-1.47282	-0.266287	0.0369351	-0.481823	0.336988	0.431851	-1.21671	1.69182	0.940043		13	9	9	NaN	NaN	NaN	NaN	0	NaN	850150000	43	852	94934.3	44	0	Q63622	Q63622	Disks large homolog 2	Dlg2	Dlg2	Disks large homolog 2
1.29656	-0.978058	-1.10339	1.35349	-0.0382068	0.185318	0.927274	-1.0053	-0.637689		3	2	2	NaN	NaN	NaN	NaN	NaN	NaN	303170000	31	1085	120628	47	0	Q63632	Q63632	Solute carrier family 12 member 4	Slc12a4	Slc12a4	Solute carrier family 12 member 4
0.73994	0.52225	0.971125	-0.207312	-2.42523	-0.00205725	-0.122349	-0.0209207	0.544552		18	18	17	21	21	NaN	NaN	0	NaN	16147000000	339	1139	126247	43	0	Q63633	Q63633	Solute carrier family 12 member 5	Slc12a5	Slc12a5	Solute carrier family 12 member 5
-0.707107	NaN	NaN	0.707107	NaN	NaN	NaN	NaN	NaN		5	4	4	NaN	NaN	NaN	NaN	NaN	NaN	216360000	4	518	56639.9	24	0	Q63639	Q63639	Retinal dehydrogenase 2	Aldh1a2	Aldh1a2	Retinal dehydrogenase 2
0.00295407	-0.718015	-1.00015	NaN	NaN	NaN	1.56936	NaN	0.14585		9	5	5	NaN	NaN	NaN	NaN	NaN	NaN	264690000	5	1369	159626	84	0	Q63644	Q63644	Rho-associated protein kinase 1	Rock1	Rock1	Rho-associated protein kinase 1
-0.217409	-0.102121	-0.14965	1.21401	-0.909329	1.07595	1.35164	-1.32371	-0.939373		5	5	5	61	61	61	NaN	0	NaN	9907300000	207	118	12796.8	4	0	Q63666	Q63666	Vesicle-associated membrane protein 1	Vamp1	Vamp1	Vesicle-associated membrane protein 1
NaN	NaN	NaN	-0.78202	1.74112	0.444953	-0.828717	0.103918	-0.679255		7	7	7	NaN	NaN	NaN	NaN	0	NaN	486770000	14	296	34017.5	15	0	Q63678	Q63678	Zinc-alpha-2-glycoprotein	Azgp1	Azgp1	Zinc-alpha-2-glycoprotein
0.207964	0.185399	-0.46051	1.66286	-1.71685	0.882407	0.447284	-0.984157	-0.224402		9	9	9	NaN	NaN	NaN	NaN	0	NaN	3788500000	120	379	44510.4	16	0	Q63692	Q63692	Hsp90 co-chaperone Cdc37;Hsp90 co-chaperone Cdc37, N-terminally processed	Cdc37	Cdc37	Hsp90 co-chaperone Cdc37
0.100647	-0.413001	-1.43837	1.15731	-0.522977	1.50685	0.936701	-0.430307	-0.89685		17	17	16	NaN	NaN	NaN	NaN	0	NaN	121240000000	1053	199	22109.4	15	0	Q63716	Q63716	Peroxiredoxin-1	Prdx1	Prdx1	Peroxiredoxin-1
-0.846323	0.63654	-1.17559	1.56382	-1.2382	0.492866	0.405302	0.821621	-0.660039		2	2	2	NaN	NaN	NaN	NaN	0	NaN	2436700000	55	137	14504.2	6	0	Q63754	Q63754	Beta-synuclein	Sncb	Sncb	Beta-synuclein
-0.125343	0.570727	-0.100661	1.92283	-1.77385	0.485685	-0.0342215	-0.718416	-0.226745		6	6	6	NaN	NaN	NaN	NaN	0	NaN	927970000	31	304	33844.7	19	0	Q63768	Q63768	Adapter molecule crk	Crk	Crk	Adapter molecule crk
-0.0362999	-0.895323	-0.499827	1.70608	0.185907	1.51337	-0.2369	-0.597389	-1.13961		10	10	10	NaN	NaN	NaN	NaN	0	NaN	5339200000	126	249	28576.9	15	0	Q63797	Q63797	Proteasome activator complex subunit 1	Psme1	Psme1	Proteasome activator complex subunit 1
-0.313687	-0.985442	-0.33443	-0.301902	1.33915	1.82788	-0.710312	0.429526	-0.950788		5	5	5	NaN	NaN	NaN	NaN	0	NaN	817650000	56	238	26857	14	0	Q63798	Q63798	Proteasome activator complex subunit 2	Psme2	Psme2	Proteasome activator complex subunit 2
NaN	NaN	NaN	NaN	NaN	-0.707107	NaN	NaN	0.707107		25	16	16	NaN	NaN	NaN	NaN	0	NaN	1339800000	20	1327	152492	66	0	Q63862	Q63862	Myosin-11	Myh11	Myh11	Myosin-11 (Fragments)
-1.16775	0.56609	NaN	NaN	NaN	-1.15419	0.302391	0.080177	1.37328		2	2	2	NaN	NaN	NaN	NaN	0	NaN	281600000	11	642.5	72031	26.5	0	Q63881;Q62897	Q63881;Q62897	Potassium voltage-gated channel subfamily D member 2;Potassium voltage-gated channel subfamily D member 3	Kcnd2;Kcnd3	Kcnd2;Kcnd3	Potassium voltage-gated channel subfamily D member 2;Potassium voltage-gated channel subfamily D member 3
-0.624987	0.271014	1.2847	-1.80888	-0.552602	0.416417	-0.739147	0.717077	1.0364		5	5	5	NaN	NaN	NaN	NaN	0	NaN	2131400000	69	322	35546.2	15	0	Q63965	Q63965	Sideroflexin-1	Sfxn1	Sfxn1	Sideroflexin-1
-0.0344805	1.28125	1.6998	-0.732072	-0.937335	-1.0972	-0.75099	0.0380518	0.532968		17	17	17	NaN	NaN	NaN	NaN	0	NaN	11325000000	307	539	58748.7	25	0	Q64057	Q64057	Alpha-aminoadipic semialdehyde dehydrogenase	Aldh7a1	Aldh7a1	Alpha-aminoadipic semialdehyde dehydrogenase
-0.711664	-1.04789	-1.38756	1.52083	0.146668	1.25455	0.485085	0.252546	-0.512559		7	7	7	NaN	NaN	NaN	NaN	0	NaN	5738000000	108	151	16975.1	10	0	Q64119;P16409	Q64119	Myosin light polypeptide 6	Myl6	Myl6	Myosin light polypeptide 6
0.851178	0.163433	1.80444	0.0852384	NaN	-0.995222	-1.33674	-0.43518	-0.13715		8	8	8	NaN	NaN	NaN	NaN	0	NaN	1719600000	56	381	42888.8	21	0	Q641W2	Q641W2	UPF0160 protein MYG1, mitochondrial	Myg1	Myg1	UPF0160 protein MYG1, mitochondrial
-0.60086	-0.450063	0.450148	1.30496	NaN	NaN	-0.142175	1.01374	-1.57575		5	5	5	NaN	NaN	NaN	NaN	0	NaN	938590000	15	528	60538.1	24	0	Q641X3	Q641X3	Beta-hexosaminidase subunit alpha	Hexa	Hexa	Beta-hexosaminidase subunit alpha
0.101804	-0.305073	0.860285	-1.20841	-0.0175495	-1.58038	-0.333621	1.19412	1.28883		8	8	8	NaN	NaN	NaN	NaN	0	NaN	1397000000	55	445	52220.8	28	0	Q641X8	Q641X8	Eukaryotic translation initiation factor 3 subunit E	Eif3e	Eif3e	Eukaryotic translation initiation factor 3 subunit E
-0.580411	-0.293879	0.59341	-1.48132	1.35563	-1.33863	0.186391	0.504629	1.05418		8	8	8	NaN	NaN	NaN	NaN	0	NaN	1922100000	62	441	48895.7	22	0	Q641Y0	Q641Y0	Dolichyl-diphosphooligosaccharide--protein glycosyltransferase 48 kDa subunit	Ddost	Ddost	Dolichyl-diphosphooligosaccharide--protein glycosyltransferase 48 kDa subunit
-0.118626	0.577498	1.06576	-1.76596	-0.0124057	-0.934067	-0.752605	1.16558	0.774826		20	20	20	51	51	51	NaN	0	NaN	22971000000	408	463	52561.5	26	0	Q641Y2	Q641Y2	NADH dehydrogenase [ubiquinone] iron-sulfur protein 2, mitochondrial	Ndufs2	Ndufs2	NADH dehydrogenase [ubiquinone] iron-sulfur protein 2, mitochondrial
-0.404449	1.3867	0.852508	-0.479326	0.159903	-1.4386	-1.4008	0.554751	0.769307		13	13	13	NaN	NaN	NaN	NaN	0	NaN	1265400000	66	698	77436	38	0	Q641Y5	Q641Y5	Ubiquitin-like modifier-activating enzyme ATG7	Atg7	Atg7	Ubiquitin-like modifier-activating enzyme ATG7
0.0572374	0.620929	0.815109	-1.68978	-0.383809	-1.40801	0.00905583	0.952251	1.02701		16	16	16	NaN	NaN	NaN	NaN	0	NaN	4336600000	122	740	82497.1	39	0	Q641Y8	Q641Y8	ATP-dependent RNA helicase DDX1	Ddx1	Ddx1	ATP-dependent RNA helicase DDX1
-0.182955	0.142319	-0.675565	NaN	NaN	-0.47796	-0.987243	2.06731	0.114093		4	4	4	NaN	NaN	NaN	NaN	0	NaN	371730000	19	593	67962	33	0	Q641Z2	Q641Z2	Tyrosine-protein phosphatase non-receptor type 9	Ptpn9	Ptpn9	Tyrosine-protein phosphatase non-receptor type 9
-0.12739	0.264188	0.820435	-1.86767	0.610939	-1.34341	-0.1222	0.913725	0.851382		25	25	14	NaN	NaN	NaN	NaN	0	NaN	11717000000	259	534	60602.8	29	0	Q641Z6	Q641Z6	EH domain-containing protein 1	Ehd1	Ehd1	EH domain-containing protein 1
0.714606	0.618255	1.25967	-1.92643	-0.256307	-0.511693	0.846057	0.122381	-0.866544		4	4	4	NaN	NaN	NaN	NaN	0	NaN	1422600000	54	283	30012.4	7	0	Q641Z8	Q641Z8	Peflin	Pef1	Pef1	Peflin
0.311202	-1.49485	0.31038	NaN	1.44911	NaN	-1.11278	0.480481	0.0564626		6	6	6	NaN	NaN	NaN	NaN	0	NaN	2132200000	41	308	36122.5	13	0	Q64232	Q64232	Very-long-chain enoyl-CoA reductase	Tecr	Tecr	Very-long-chain enoyl-CoA reductase
NaN	NaN	NaN	-1.058	1.74937	-0.658362	-0.149275	0.481134	-0.364868		4	4	4	NaN	NaN	NaN	NaN	0	NaN	446410000	16	349	38851	19	0	Q64240	Q64240	Protein AMBP;Alpha-1-microglobulin;Inter-alpha-trypsin inhibitor light chain;Trypstatin	Ambp	Ambp	Protein AMBP
-0.367896	-0.682904	-0.571996	-0.333334	-0.814077	0.958441	1.93491	-0.963575	0.840433		7	7	7	NaN	NaN	NaN	NaN	0	NaN	2417500000	49	303	34435.9	14	0	Q64244	Q64244	ADP-ribosyl cyclase/cyclic ADP-ribose hydrolase 1	Cd38	Cd38	ADP-ribosyl cyclase/cyclic ADP-ribose hydrolase 1
NaN	NaN	NaN	NaN	0.707107	NaN	NaN	-0.707107	NaN		4	4	4	NaN	NaN	NaN	NaN	NaN	NaN	305200000	6	479	54551.8	23	0	Q64268	Q64268	Heparin cofactor 2	Serpind1	Serpind1	Heparin cofactor 2
NaN	1.57432	NaN	-0.132129	NaN	NaN	-0.923003	-0.768189	0.248999		2	2	2	NaN	NaN	NaN	NaN	0	NaN	203440000	16	218	24396.9	15	0	Q642A4	Q642A4	UPF0598 protein C8orf82 homolog			UPF0598 protein C8orf82 homolog
0.759606	0.323162	-0.398884	-0.539182	-1.97984	-0.182125	1.67371	0.00522582	0.338329		2	2	2	NaN	NaN	NaN	NaN	0	NaN	540680000	24	376	40936.2	16	0	Q642G4	Q642G4	Peroxisomal membrane protein PEX14	Pex14	Pex14	Peroxisomal membrane protein PEX14
0.445723	0.862395	-0.726627	-1.17704	1.61798	-1.12322	0.697804	0.249013	-0.846033		16	16	9	NaN	NaN	NaN	NaN	0	NaN	8752200000	234	524	57960.4	26	0	Q64303	Q64303	Serine/threonine-protein kinase PAK 2;PAK-2p27;PAK-2p34	Pak2	Pak2	Serine/threonine-protein kinase PAK 2
1.41726	1.27158	-0.27788	-0.727545	-1.10196	1.15376	-0.281996	-0.51805	-0.935167		4	4	4	NaN	NaN	NaN	NaN	0	NaN	6557600000	220	223	25579.9	9	0	Q64361	Q64361	Latexin	Lxn	Lxn	Latexin
0.0040969	0.712799	1.11613	-1.46615	-1.17958	-0.934499	-0.109426	0.708807	1.14782		22	22	22	NaN	NaN	NaN	NaN	0	NaN	21770000000	424	763	82664.9	39	0	Q64428	Q64428	Trifunctional enzyme subunit alpha, mitochondrial;Long-chain enoyl-CoA hydratase;Long chain 3-hydroxyacyl-CoA dehydrogenase	Hadha	Hadha	Trifunctional enzyme subunit alpha, mitochondrial
0.232322	0.770064	1.33171	-1.116	-0.65354	-1.19643	-0.783724	0.0522969	1.3633		8	8	7	NaN	NaN	NaN	NaN	0	NaN	2265800000	99	407	46105.7	19	0	Q64536	Q64536	[Pyruvate dehydrogenase (acetyl-transferring)] kinase isozyme 2, mitochondrial	Pdk2	Pdk2	[Pyruvate dehydrogenase (acetyl-transferring)] kinase isozyme 2, mitochondrial
-0.571297	-1.53638	-0.378848	0.414645	0.10498	1.55774	-0.494591	1.42838	-0.52463		9	9	9	NaN	NaN	NaN	NaN	0	NaN	10171000000	132	270	28570.1	11	0	Q64537	Q64537	Calpain small subunit 1	Capns1	Capns1	Calpain small subunit 1
-0.465785	-0.257523	0.759113	-0.807798	1.72148	0.60827	-0.291102	-1.69811	0.43145		19	11	11	24	15	15	NaN	0	NaN	3272700000	102	1203	133094	46	0	Q64542	Q64542	Plasma membrane calcium-transporting ATPase 4	Atp2b4	Atp2b4	Plasma membrane calcium-transporting ATPase 4
0.568447	-0.0763672	-0.536135	-0.926922	0.53745	-1.58798	1.80588	0.57118	-0.355552		15	15	15	NaN	NaN	NaN	NaN	0	NaN	13420000000	259	777	83001.9	30	0	Q64548	Q64548	Reticulon-1	Rtn1	Rtn1	Reticulon-1
1.15893	0.954882	0.412023	-0.138172	0.422623	0.711167	-1.86723	-0.734673	-0.919547		11	11	11	NaN	NaN	NaN	NaN	0	NaN	44243000000	523	381	42735.1	21	0	Q64559	Q64559	Cytosolic acyl coenzyme A thioester hydrolase	Acot7	Acot7	Cytosolic acyl coenzyme A thioester hydrolase
0.82598	0.738902	1.46207	-1.31295	-0.25243	-1.02909	-1.17804	0.125939	0.619618		40	40	40	NaN	NaN	NaN	NaN	0	NaN	14073000000	402	1249	138293	63	0	Q64560	Q64560	Tripeptidyl-peptidase 2	Tpp2	Tpp2	Tripeptidyl-peptidase 2
NaN	NaN	-0.707107	NaN	NaN	NaN	NaN	NaN	0.707107		2	2	2	NaN	NaN	NaN	NaN	0	NaN	60045000	3	919	100500	43	0	Q64566	Q64566	Calcium-transporting ATPase type 2C member 1	Atp2c1	Atp2c1	Calcium-transporting ATPase type 2C member 1
0.379069	-0.153403	0.985707	-1.67116	0.463755	0.437011	-0.75667	-1.07502	1.39072		29	21	20	28	NaN	NaN	NaN	0	NaN	11411000000	296	1258	138559	53	0	Q64568	Q64568	Plasma membrane calcium-transporting ATPase 3	Atp2b3	Atp2b3	Plasma membrane calcium-transporting ATPase 3
0.433477	-0.0183644	0.919866	0.612333	-1.68831	0.250249	-1.70219	0.411233	0.781708		8	8	8	NaN	NaN	NaN	NaN	0	NaN	3266300000	95	335	36132.7	20	0	Q64591	Q64591	2,4-dienoyl-CoA reductase, mitochondrial	Decr1	Decr1	2,4-dienoyl-CoA reductase, mitochondrial
0.818047	0.365664	-0.394891	-1.05931	-1.85625	1.14711	1.06292	0.0684441	-0.151739		7	7	6	5	5	NaN	NaN	0	NaN	1315000000	48	1898	211494	100	0	Q64604	Q64604	Receptor-type tyrosine-protein phosphatase F	Ptprf	Ptprf	Receptor-type tyrosine-protein phosphatase F
0.0825884	0.99085	0.0532776	-0.576196	2.04239	-1.01789	-1.1778	-0.159958	-0.237255		6	5	5	NaN	NaN	NaN	NaN	0	NaN	1335400000	57	1907	211931	85	0	Q64605	Q64605	Receptor-type tyrosine-protein phosphatase S	Ptprs	Ptprs	Receptor-type tyrosine-protein phosphatase S
0.16846	0.957151	0.0312427	0.577065	-2.18679	0.932166	-0.973538	0.229822	0.264423		7	7	7	NaN	NaN	NaN	NaN	0	NaN	815600000	49	493	55248.7	27	0	Q64611	Q64611	Cysteine sulfinic acid decarboxylase	Csad	Csad	Cysteine sulfinic acid decarboxylase
-0.00435931	-0.444261	1.40382	-1.73002	0.62789	-0.859974	-0.474763	0.303751	1.17792		6	6	6	NaN	NaN	NaN	NaN	0	NaN	859340000	25	305	35159.2	16	0	Q64620	Q64620	Serine/threonine-protein phosphatase 6 catalytic subunit;Serine/threonine-protein phosphatase 6 catalytic subunit, N-terminally processed	Ppp6c	Ppp6c	Serine/threonine-protein phosphatase 6 catalytic subunit
-0.393115	-0.658167	-0.276894	1.61333	NaN	-1.00837	-0.743391	-0.0042076	1.47082		11	11	11	NaN	NaN	NaN	NaN	0	NaN	372380000	12	1807	200589	96	0	Q64632	Q64632	Integrin beta-4	Itgb4	Itgb4	Integrin beta-4
1.18872	1.18054	0.715076	0.271176	0.539549	-0.369635	-1.19188	-1.30349	-1.03006		10	10	10	NaN	NaN	NaN	NaN	0	NaN	7072100000	199	361	40133.6	19	0	Q64640	Q64640	Adenosine kinase	Adk	Adk	Adenosine kinase
-0.264053	-0.127768	-0.0681623	-1.75054	NaN	-0.803477	0.757518	0.928679	1.3278		8	8	8	NaN	NaN	NaN	NaN	0	NaN	1582400000	95	503	56706.6	24	0	Q64654	Q64654	Lanosterol 14-alpha demethylase	Cyp51a1	Cyp51a1	Lanosterol 14-alpha demethylase
-0.677326	NaN	1.20969	NaN	-0.845001	NaN	NaN	-0.654541	0.967182		4	4	4	NaN	NaN	NaN	NaN	0	NaN	261000000	8	595	68391.6	29	0	Q64663	Q64663	P2X purinoceptor 7	P2rx7	P2rx7	P2X purinoceptor 7
-0.631058	1.2078	0.451396	-2.01335	-0.236037	-0.547185	0.96501	0.77354	0.0298858		7	7	7	NaN	NaN	NaN	NaN	0	NaN	1170700000	49	415	46871.2	23	0	Q66H12	Q66H12	Alpha-N-acetylgalactosaminidase	Naga	Naga	Alpha-N-acetylgalactosaminidase
-0.0560434	-0.288295	-1.29507	2.03651	NaN	0.182498	-0.974778	0.315056	0.0801263		3	3	3	NaN	NaN	NaN	NaN	0	NaN	359780000	27	471	52312.1	22	0	Q66H15	Q66H15	Regulator of microtubule dynamics protein 3	Rmdn3	Rmdn3	Regulator of microtubule dynamics protein 3
NaN	NaN	0.158307	NaN	NaN	-0.137615	-1.22603	NaN	1.20534		2	2	2	NaN	NaN	NaN	NaN	0	NaN	292000000	16	531	57488.8	19	0	Q66H20	Q66H20	Polypyrimidine tract-binding protein 2	Ptbp2	Ptbp2	Polypyrimidine tract-binding protein 2
NaN	NaN	NaN	NaN	NaN	NaN	NaN	-0.707107	0.707107		3	3	3	NaN	NaN	NaN	NaN	NaN	NaN	110420000	10	320	35115.4	17	0	Q66H59	Q66H59	N-acetylneuraminate lyase	Npl	Npl	N-acetylneuraminate lyase
1.75624	1.02452	-0.644571	-0.899	NaN	NaN	-0.15734	-0.408555	-0.671294		2	2	2	NaN	NaN	NaN	NaN	0	NaN	541310000	27	312	35260.7	12	0	Q66H71	Q66H71	Serine/threonine-protein phosphatase CPPED1	Cpped1	Cpped1	Serine/threonine-protein phosphatase CPPED1
-0.851593	0.022744	-0.0504413	-0.284306	0.646569	-1.92753	0.0369015	1.48463	0.923022		8	8	8	20	20	20	NaN	0	NaN	896200000	36	511	57199.4	27	0	Q66H80	Q66H80	Coatomer subunit delta	Arcn1	Arcn1	Coatomer subunit delta
0.0889504	0.0627323	0.761703	-1.23568	1.49597	-1.59434	-0.580321	0.86345	0.13753		8	8	8	50	50	50	NaN	0	NaN	8901000000	202	186	21539	11	0	Q66HA6	Q66HA6	ADP-ribosylation factor-like protein 8B	Arl8b	Arl8b	ADP-ribosylation factor-like protein 8B
1.55962	1.34646	0.568235	0.400728	-0.580585	-1.22571	-0.745156	-0.645927	-0.677662		29	28	28	NaN	NaN	NaN	NaN	0	NaN	26365000000	576	858	96418.5	47	0	Q66HA8	Q66HA8	Heat shock protein 105 kDa	Hsph1	Hsph1	Heat shock protein 105 kDa
-0.93187	-0.0581183	-0.735684	0.819864	-0.481857	-0.00209555	-1.29967	1.77888	0.910543		31	29	29	NaN	NaN	NaN	NaN	0	NaN	35050000000	701	804	92771	39	0	Q66HD0	Q66HD0	Endoplasmin	Hsp90b1	Hsp90b1	Endoplasmin
0.478289	0.987641	1.25063	-1.48878	-1.08833	-1.1029	-0.115719	0.442888	0.636288		30	30	30	NaN	NaN	NaN	NaN	0	NaN	68423000000	942	727	79412.3	42	0	Q66HF1	Q66HF1	NADH-ubiquinone oxidoreductase 75 kDa subunit, mitochondrial	Ndufs1	Ndufs1	NADH-ubiquinone oxidoreductase 75 kDa subunit, mitochondrial
0.485631	1.01428	1.01144	-1.47825	-1.01404	-1.00655	-0.548806	0.720994	0.815306		13	13	12	NaN	NaN	NaN	NaN	0	NaN	4723000000	86	519	57624.8	24	0	Q66HF8	Q66HF8	Aldehyde dehydrogenase X, mitochondrial	Aldh1b1	Aldh1b1	Aldehyde dehydrogenase X, mitochondrial
0.0452948	1.15697	-0.455817	-0.121853	1.55717	0.243935	-1.92197	-0.508408	0.00467972		5	5	5	NaN	NaN	NaN	NaN	0	NaN	1027300000	48	342	37892.7	15	0	Q66HG4	Q66HG4	Aldose 1-epimerase	Galm	Galm	Aldose 1-epimerase
-0.51959	NaN	-1.01746	NaN	NaN	NaN	NaN	0.261795	1.27525		4	4	4	NaN	NaN	NaN	NaN	0	NaN	499180000	6	663	75586.4	20	0	Q66HG5	Q66HG5	Transmembrane 9 superfamily member 2	Tm9sf2	Tm9sf2	Transmembrane 9 superfamily member 2
-0.639693	NaN	-0.624244	-0.0931146	NaN	-0.131097	1.98261	NaN	-0.494466		2	2	2	NaN	NaN	NaN	NaN	NaN	NaN	165350000	19	509	56942	23	0	Q66HL2	Q66HL2	Src substrate cortactin	Cttn	Cttn	Src substrate cortactin
-0.854328	-0.440256	-0.83996	NaN	NaN	NaN	NaN	0.852064	1.28248		5	5	5	NaN	NaN	NaN	NaN	0	NaN	316910000	6	914	96004.5	34	0	Q66HR0	Q66HR0	Solute carrier family 12 member 9	Slc12a9	Slc12a9	Solute carrier family 12 member 9
0.707362	0.549714	-1.56651	-0.223512	0.965939	-1.04144	1.34121	-0.918015	0.185249		8	6	6	NaN	NaN	NaN	NaN	0	NaN	1313100000	48	268	30004.2	15	0	Q66HR2	Q66HR2	Microtubule-associated protein RP/EB family member 1	Mapre1	Mapre1	Microtubule-associated protein RP/EB family member 1
0.18166	0.69402	0.779241	-1.1535	-1.39447	-1.34793	0.863225	0.474645	0.903118		30	30	30	NaN	NaN	NaN	NaN	0	NaN	7171300000	292	909	101952	53	0	Q66X93	Q66X93	Staphylococcal nuclease domain-containing protein 1	Snd1	Snd1	Staphylococcal nuclease domain-containing protein 1
-1.11585	-0.0105458	0.730193	0.2482	NaN	-1.11753	-1.02674	0.80726	1.48501		4	4	4	NaN	NaN	NaN	NaN	0	NaN	1156100000	22	315	33417.9	9	0	Q68A21	Q68A21	Transcriptional activator protein Pur-beta	Purb	Purb	Transcriptional activator protein Pur-beta
-0.181904	-0.160618	-0.44665	-1.63728	0.752749	-1.18901	0.742763	1.43533	0.684619		18	18	10	NaN	NaN	NaN	NaN	0	NaN	63976000000	771	780	86067.6	34	0	Q68FP1	Q68FP1	Gelsolin	Gsn	Gsn	Gelsolin
0.472279	0.591039	0.49192	-1.94065	1.31571	-1.26491	0.141815	0.254095	-0.0613014		24	24	24	NaN	NaN	NaN	NaN	0	NaN	31609000000	535	541	59536.8	33	0	Q68FQ0	Q68FQ0	T-complex protein 1 subunit epsilon	Cct5	Cct5	T-complex protein 1 subunit epsilon
-0.512142	-0.807937	-0.831897	1.3719	0.532194	1.48302	0.501593	-1.23477	-0.501964		6	6	6	NaN	NaN	NaN	NaN	0	NaN	2197500000	93	310	34782.6	18	0	Q68FQ2	Q68FQ2	Junctional adhesion molecule C	Jam3	Jam3	Junctional adhesion molecule C
0.110105	0.28913	0.26301	-1.21422	-1.22621	-1.25747	0.694702	1.00721	1.33374		14	14	14	NaN	NaN	NaN	NaN	0	NaN	27864000000	520	437	50060.8	24	0	Q68FR6	Q68FR6	Elongation factor 1-gamma	Eef1g	Eef1g	Elongation factor 1-gamma
-0.221238	-0.717692	-0.393544	1.20369	-2.08457	0.353562	0.743548	0.863036	0.253209		10	10	10	47	47	47	NaN	0	NaN	5466500000	95	281	31330.1	16	0	Q68FR9	Q68FR9	Elongation factor 1-delta	Eef1d	Eef1d	Elongation factor 1-delta
1.80126	1.23237	-0.0727649	-0.383259	0.0874208	-1.61035	-0.0773697	-0.481294	-0.496022		16	16	16	NaN	NaN	NaN	NaN	0	NaN	9939300000	277	406	46289.8	26	0	Q68FS2	Q68FS2	COP9 signalosome complex subunit 4	Cops4	Cops4	COP9 signalosome complex subunit 4
-0.567639	1.37926	0.987144	-1.47421	NaN	NaN	-0.0415107	0.399728	-0.682771		3	3	3	9	9	9	NaN	0	NaN	237190000	19	522	57561	16	0	Q68FS3	Q68FS3	F-box only protein 7	Fbxo7	Fbxo7	F-box only protein 7
0.655673	0.834253	0.953962	-1.47789	0.807799	-1.11778	-1.19983	0.653005	-0.109188		23	23	23	NaN	NaN	NaN	NaN	0	NaN	20939000000	446	519	56150.1	28	0	Q68FS4	Q68FS4	Cytosol aminopeptidase	Lap3	Lap3	Cytosol aminopeptidase
0.0991864	0.191223	0.974438	1.72942	-1.57142	0.0150674	0.242206	-0.648335	-1.03178		3	3	3	16	16	16	NaN	0	NaN	587870000	60	312	35145.6	12	0	Q68FT1	Q68FT1	Ubiquinone biosynthesis protein COQ9, mitochondrial	Coq9	Coq9	Ubiquinone biosynthesis protein COQ9, mitochondrial
0.227565	1.3077	-1.64608	NaN	NaN	NaN	0.162518	-0.526251	0.474551		6	6	6	NaN	NaN	NaN	NaN	0	NaN	477450000	9	581	62879.1	26	0	Q68FT3	Q68FT3	Pyridine nucleotide-disulfide oxidoreductase domain-containing protein 2	Pyroxd2	Pyroxd2	Pyridine nucleotide-disulfide oxidoreductase domain-containing protein 2
0.174589	1.57015	-0.901539	-0.805349	NaN	NaN	-1.17943	0.578877	0.562696		2	2	2	9	9	9	NaN	0	NaN	69559000	9	432	47255.9	24	0	Q68FT9	Q68FT9	Selenocysteine lyase	Scly	Scly	Selenocysteine lyase
0.49982	0.67102	0.868533	0.0411969	-2.52828	0.189397	-0.149582	0.27541	0.132488		13	13	13	NaN	NaN	NaN	NaN	0	NaN	11647000000	235	255	27687.4	13	0	Q68FU3	Q68FU3	Electron transfer flavoprotein subunit beta	Etfb	Etfb	Electron transfer flavoprotein subunit beta
-0.296653	-0.0869331	-1.1753	1.87002	NaN	0.709076	0.260147	-1.20409	-0.0762666		9	7	7	14	NaN	NaN	NaN	0	NaN	787370000	12	723	81672.2	45	0	Q68FW7	Q68FW7	Threonine--tRNA ligase, mitochondrial	Tars2	Tars2	Threonine--tRNA ligase, mitochondrial
0.267045	0.465924	-0.305045	-0.144811	1.98901	-1.78846	-0.169035	0.269747	-0.584373		8	8	8	NaN	NaN	NaN	NaN	0	NaN	6065500000	122	423	47859.1	25	0	Q68FW9	Q68FW9	COP9 signalosome complex subunit 3	Cops3	Cops3	COP9 signalosome complex subunit 3
0.122186	0.729301	1.60451	-1.36927	-0.112996	-1.2206	-0.904389	0.474174	0.677081		17	17	17	NaN	NaN	NaN	NaN	0	NaN	35863000000	684	385	42353.9	19	0	Q68FX0	Q68FX0	Isocitrate dehydrogenase [NAD] subunit beta, mitochondrial	Idh3B	Idh3B	Isocitrate dehydrogenase [NAD] subunit beta, mitochondrial
0.793307	1.08879	0.297156	-1.46879	0.928422	0.552545	-1.58991	-0.122499	-0.479027		10	10	10	NaN	NaN	NaN	NaN	0	NaN	3190700000	128	423	46424	18	0	Q68FX1	Q68FX1	Mannose-6-phosphate isomerase	Mpi	Mpi	Mannose-6-phosphate isomerase
0.680075	0.815917	0.684034	-1.92284	0.863153	-1.36267	0.236894	-0.153063	0.158497		6	6	6	NaN	NaN	NaN	NaN	0	NaN	2162600000	47	310	34098.3	19	0	Q68FX9	Q68FX9	NAD-dependent protein deacylase sirtuin-5, mitochondrial	Sirt5	Sirt5	NAD-dependent protein deacylase sirtuin-5, mitochondrial
-0.517599	0.797458	1.82878	-1.52258	0.141565	-0.954494	-0.408152	0.576504	0.058512		16	16	16	NaN	NaN	NaN	NaN	0	NaN	56444000000	619	480	52848.8	19	0	Q68FY0	Q68FY0	Cytochrome b-c1 complex subunit 1, mitochondrial	Uqcrc1	Uqcrc1	Cytochrome b-c1 complex subunit 1, mitochondrial
1.6225	0.515137	0.188151	NaN	0.435154	NaN	-0.482576	-0.982635	-1.29573		4	4	4	24	24	24	NaN	0	NaN	333150000	7	288	31687.2	14	0	Q68G31	Q68G31	Phenazine biosynthesis-like domain-containing protein	Pbld	Pbld	Phenazine biosynthesis-like domain-containing protein
0.91468	1.56814	0.217109	-0.848154	NaN	-1.22828	-0.996363	-0.241866	0.61473		7	7	7	NaN	NaN	NaN	NaN	0	NaN	694820000	19	219	24359	14	0	Q69BT7	Q69BT7	Trafficking protein particle complex subunit 4	Trappc4	Trappc4	Trafficking protein particle complex subunit 4
-0.398725	0.63262	0.793231	-1.72598	-1.09598	NaN	0.432093	0.173351	1.18939		6	6	6	NaN	NaN	NaN	NaN	0	NaN	579060000	19	679	74774.1	37	0	Q6AXM7	Q6AXM7	HBS1-like protein	Hbs1l	Hbs1l	HBS1-like protein
0.649221	-0.227075	-0.507174	-1.49996	1.33729	-1.46892	0.702673	0.688608	0.325331		11	11	11	NaN	NaN	NaN	NaN	0	NaN	5824800000	113	354	39617.4	17	0	Q6AXM8	Q6AXM8	Serum paraoxonase/arylesterase 2	Pon2	Pon2	Serum paraoxonase/arylesterase 2
0.360296	0.72363	1.535	-1.07625	NaN	-0.541482	-1.53753	0.392648	0.143688		4	4	4	NaN	NaN	NaN	NaN	0	NaN	789020000	16	349	38512.9	23	0	Q6AXQ0	Q6AXQ0	SUMO-activating enzyme subunit 1;SUMO-activating enzyme subunit 1, N-terminally processed	Sae1	Sae1	SUMO-activating enzyme subunit 1
0.862686	-1.11994	-0.464203	NaN	NaN	NaN	1.23416	NaN	-0.512711		4	4	4	NaN	NaN	NaN	NaN	0	NaN	357300000	12	608	67176.3	25	0	Q6AXQ5	Q6AXQ5	2,5-phosphodiesterase 12	Pde12	Pde12	2',5'-phosphodiesterase 12
-1.74708	-0.666172	0.656911	NaN	NaN	NaN	0.425042	0.612895	0.718402		4	4	4	NaN	NaN	NaN	NaN	0	NaN	528780000	6	537	61527.5	21	0	Q6AXR4	Q6AXR4	Beta-hexosaminidase subunit beta	Hexb	Hexb	Beta-hexosaminidase subunit beta
NaN	NaN	NaN	NaN	NaN	NaN	0.707107	-0.707107	NaN		2	2	2	NaN	NaN	NaN	NaN	0	NaN	65388000	3	378	42892.2	21	0	Q6AXS3	Q6AXS3	Protein DEK	Dek	Dek	Protein DEK
NaN	NaN	0.448598	NaN	NaN	NaN	-1.33147	-0.122569	1.00544		2	2	2	NaN	NaN	NaN	NaN	0	NaN	638640000	20	350	39081.8	15	0	Q6AXS4	Q6AXS4	Renin receptor	Atp6ap2	Atp6ap2	Renin receptor
0.420052	0.852179	-0.334475	-1.93526	0.795031	-1.20972	0.903974	-0.0608712	0.569094		10	10	10	NaN	NaN	NaN	NaN	0	NaN	3287200000	166	223	24163.4	13	0	Q6AXT5	Q6AXT5	Ras-related protein Rab-21	Rab21	Rab21	Ras-related protein Rab-21
-0.643283	-0.442109	1.36185	-0.824264	0.62628	-0.29899	-1.59148	0.589314	1.22268		18	18	18	NaN	NaN	NaN	NaN	0	NaN	9245100000	218	469	51960.2	30	0	Q6AXV4	Q6AXV4	Sorting and assembly machinery component 50 homolog	Samm50	Samm50	Sorting and assembly machinery component 50 homolog
NaN	0.160096	-0.832487	NaN	NaN	NaN	1.34992	NaN	-0.67753		2	2	2	NaN	NaN	NaN	NaN	0	NaN	212990000	10	157	17274.8	7	0	Q6AXW1	Q6AXW1	Glutaredoxin-2, mitochondrial	Glrx2	Glrx2	Glutaredoxin-2, mitochondrial
0.976971	1.18535	-0.439897	-1.24488	0.0929439	-1.63715	0.965581	-0.317485	0.418568		8	8	8	NaN	NaN	NaN	NaN	0	NaN	10797000000	227	229	25763.2	13	0	Q6AXX6	Q6AXX6	Redox-regulatory protein FAM213A	Fam213a	Fam213a	Redox-regulatory protein FAM213A
0.546368	0.450934	1.25615	-1.99684	NaN	-0.292068	-0.730673	0.282603	0.483524		5	4	4	NaN	NaN	NaN	NaN	0	NaN	1481400000	31	222	25807.9	13	0	Q6AXY0	Q6AXY0	Glutathione S-transferase A6	Gsta6	Gsta6	Glutathione S-transferase A6
0.394875	0.25595	1.38612	-1.36206	0.111561	-1.87996	0.509531	0.179779	0.4042		3	3	3	NaN	NaN	NaN	NaN	0	NaN	377280000	27	291	33090.2	19	0	Q6AY04	Q6AY04	Uncharacterized protein C2orf47 homolog, mitochondrial		Maip1	m-AAA protease-interacting protein 1, mitochondrial
-1.3191	-0.133071	1.33654	-0.51443	NaN	NaN	-0.448516	-0.299888	1.37847		5	3	3	NaN	NaN	NaN	NaN	0	NaN	274270000	15	449	49293.6	17	0	Q6AY09	Q6AY09	Heterogeneous nuclear ribonucleoprotein H2	Hnrnph2	Hnrnph2	Heterogeneous nuclear ribonucleoprotein H2
-1.14554	0.0642229	-0.60954	NaN	-1.02582	NaN	1.32761	1.21051	0.178551		3	3	3	16	16	16	NaN	0	NaN	390100000	21	288	32200.8	16	0	Q6AY17	Q6AY17	Alpha/beta hydrolase domain-containing protein 17B	Abhd17b	Abhd17b	Protein ABHD17B
-0.517949	-0.259502	1.29126	NaN	NaN	-1.57518	-0.517549	0.816917	0.762004		2	2	2	NaN	NaN	NaN	NaN	NaN	NaN	99360000	8	528	58904.7	32	0	Q6AY19	Q6AY19	AarF domain-containing protein kinase 4	Adck4	Coq8b	Atypical kinase COQ8B, mitochondrial
0.123434	-1.47119	-0.366218	1.41995	NaN	0.661221	0.988243	-1.08855	-0.266891		2	2	2	NaN	NaN	NaN	NaN	0	NaN	1747000000	34	278	31095.4	15	0	Q6AY20	Q6AY20	Cation-dependent mannose-6-phosphate receptor	M6pr	M6pr	Cation-dependent mannose-6-phosphate receptor
-0.47403	0.625099	1.15286	-1.39619	0.492999	-1.63175	-0.261185	0.843297	0.648905		5	5	5	NaN	NaN	NaN	NaN	0	NaN	968970000	35	320	33673.1	18	0	Q6AY23	Q6AY23	Pyrroline-5-carboxylate reductase 2	Pycr2	Pycr2	Pyrroline-5-carboxylate reductase 2
0.425048	-0.0253196	0.429532	-1.85931	-0.222594	-1.30295	0.461452	0.936942	1.15721		10	10	10	NaN	NaN	NaN	NaN	0	NaN	13290000000	145	429	47088.2	20	0	Q6AY30	Q6AY30	Saccharopine dehydrogenase-like oxidoreductase	Sccpdh	Sccpdh	Saccharopine dehydrogenase-like oxidoreductase
0.693953	-0.843711	-0.404712	0.116285	1.96926	-0.347354	0.758004	-1.2632	-0.678528		4	4	4	11	11	11	NaN	0	NaN	2552300000	54	328	37172.6	14	0	Q6AY41	Q6AY41	Cell cycle control protein 50A	Tmem30a	Tmem30a	Cell cycle control protein 50A
-0.663264	0.631201	0.21559	1.59643	NaN	-1.48773	-0.540163	NaN	0.247937		3	3	3	NaN	NaN	NaN	NaN	0	NaN	1126700000	11	369	40705.2	20	0	Q6AY53	Q6AY53	Deoxyhypusine synthase	Dhps	Dhps	Deoxyhypusine synthase
0.406795	-0.425259	-0.135302	2.29661	NaN	-0.221597	-0.641178	-0.438246	-0.841824		4	4	4	NaN	NaN	NaN	NaN	0	NaN	588570000	30	219	24117.5	12	0	Q6AY63	Q6AY63	ADP-sugar pyrophosphatase	Nudt5	Nudt5	ADP-sugar pyrophosphatase
0.020641	0.838814	1.64655	-1.32901	NaN	NaN	-0.204184	-0.876087	-0.0967238		3	3	3	NaN	NaN	NaN	NaN	0	NaN	318880000	10	341	37772.6	15	0	Q6AY65	Q6AY65	Arfaptin-2	Arfip2	Arfip2	Arfaptin-2
-0.195553	-0.476989	-1.10372	2.12596	0.387979	0.902585	-0.741412	-0.252576	-0.646267		9	9	9	NaN	NaN	NaN	NaN	0	NaN	18152000000	362	414	46396	17	0	Q6AY84	Q6AY84	Secernin-1	Scrn1	Scrn1	Secernin-1
-0.456469	0.346617	1.10671	-0.613792	NaN	-1.79169	-0.411785	1.03925	0.781159		4	4	4	NaN	NaN	NaN	NaN	0	NaN	835270000	26	327	38114.8	19	0	Q6AY86	Q6AY86	Vacuolar protein sorting-associated protein 26A	Vps26a	Vps26a	Vacuolar protein sorting-associated protein 26A
-0.258716	0.856751	0.468504	NaN	0.766379	NaN	NaN	0.00885507	-1.84177		4	4	4	NaN	NaN	NaN	NaN	0	NaN	261270000	18	349	38798.9	13	0	Q6AYC4	Q6AYC4	Macrophage-capping protein	Capg	Capg	Macrophage-capping protein
0.356088	0.248782	0.285246	-1.81593	0.115304	-0.464039	-0.885339	1.81728	0.342602		10	10	10	NaN	NaN	NaN	NaN	0	NaN	3569900000	111	394	43656.8	22	0	Q6AYD3	Q6AYD3	Proliferation-associated protein 2G4	Pa2g4	Pa2g4	Proliferation-associated protein 2G4
NaN	NaN	NaN	0.707107	NaN	NaN	NaN	-0.707107	NaN		3	3	3	NaN	NaN	NaN	NaN	NaN	NaN	133920000	2	394	41936.2	22	0	Q6AYD4	Q6AYD4	Endothelial cell-selective adhesion molecule	Esam	Esam	Endothelial cell-selective adhesion molecule
0.18077	-0.211533	-0.505216	0.543555	-0.670036	-1.26632	2.21847	0.276923	-0.566618		7	7	7	NaN	NaN	NaN	NaN	0	NaN	3151000000	102	365	40787.3	15	0	Q6AYE2	Q6AYE2	Endophilin-B1	Sh3glb1	Sh3glb1	Endophilin-B1
1.38202	-1.38894	NaN	-0.776303	NaN	0.285067	-0.170971	NaN	0.66912		3	3	3	NaN	NaN	NaN	NaN	NaN	NaN	1204700000	13	787	85958.8	38	0	Q6AYF4	Q6AYF4	Integrin beta-6	Itgb6	Itgb6	Integrin beta-6
0.938266	1.6536	0.760901	0.388055	-1.18167	-0.492831	-1.00087	-1.00557	-0.0598861		8	8	8	NaN	NaN	NaN	NaN	0	NaN	1529000000	65	454	49998.4	23	0	Q6AYG3	Q6AYG3	Protein prune homolog	Prune	Prune	Protein prune homolog
0.733964	0.575276	1.1463	-0.248404	-2.24421	-0.697998	0.0769226	0.394041	0.264111		8	8	8	NaN	NaN	NaN	NaN	0	NaN	3088400000	57	299	32630.7	16	0	Q6AYG5	Q6AYG5	Ethylmalonyl-CoA decarboxylase	Echdc1	Echdc1	Ethylmalonyl-CoA decarboxylase
0.253964	-0.188057	-0.622655	2.13725	-1.12924	0.634275	0.397729	-0.67493	-0.808329		14	14	14	NaN	NaN	NaN	NaN	0	NaN	12216000000	265	402	44147.9	20	0	Q6AYH5	Q6AYH5	Dynactin subunit 2	Dctn2	Dctn2	Dynactin subunit 2
-0.823182	NaN	-0.68631	1.67101	NaN	NaN	0.0709332	NaN	-0.232455		3	3	3	NaN	NaN	NaN	NaN	0	NaN	250800000	8	258	26968.4	7	0	Q6AYH6	Q6AYH6	ER membrane protein complex subunit 10	Emc10	Emc10	ER membrane protein complex subunit 10
1.38635	-0.0263829	0.00839011	0.687578	NaN	-2.05967	0.488237	-0.299331	-0.185164		3	3	3	NaN	NaN	NaN	NaN	0	NaN	3441900000	20	582	64921	21	0	Q6AYI5	Q6AYI5	Leucine-rich repeat protein SHOC-2	Shoc2	Shoc2	Leucine-rich repeat protein SHOC-2
0.494955	-0.621675	0.137157	0.992621	1.85347	-0.110787	-1.43205	-0.696478	-0.61722		11	11	11	NaN	NaN	NaN	NaN	0	NaN	3350600000	103	557	60883.5	23	0	Q6AYK3	Q6AYK3	Inositol-3-phosphate synthase 1	Isyna1	Isyna1	Inositol-3-phosphate synthase 1
1.8563	0.513526	0.546395	0.0618679	-1.53436	-0.783871	0.54247	-0.567306	-0.635022		10	10	10	NaN	NaN	NaN	NaN	0	NaN	5980500000	130	229	26541.2	13	0	Q6AYK6	Q6AYK6	Calcyclin-binding protein	Cacybp	Cacybp	Calcyclin-binding protein
NaN	NaN	NaN	NaN	NaN	NaN	NaN	-0.707107	0.707107		4	4	4	NaN	NaN	NaN	NaN	NaN	NaN	368960000	7	548	63988.7	25	0	Q6AYK8	Q6AYK8	Eukaryotic translation initiation factor 3 subunit D	Eif3d	Eif3d	Eukaryotic translation initiation factor 3 subunit D
1.00659	1.15226	0.59475	-0.74994	-1.99201	-0.66869	-0.130957	0.39937	0.388624		14	14	12	40	40	NaN	NaN	0	NaN	14427000000	256	375	42412	21	0	Q6AYN4	Q6AYN4	Phytanoyl-CoA hydroxylase-interacting protein-like	Phyhipl	Phyhipl	Phytanoyl-CoA hydroxylase-interacting protein-like
0.677006	0.282455	-1.36695	NaN	-0.612371	NaN	-0.524776	1.70773	-0.163098		4	4	4	19	19	19	NaN	0	NaN	292150000	15	300	34535.5	19	0	Q6AYP7	Q6AYP7	7-methylguanosine phosphate-specific 5-nucleotidase	Nt5c3b	Nt5c3b	7-methylguanosine phosphate-specific 5'-nucleotidase
-0.351177	-0.143886	-1.34669	-0.630737	NaN	NaN	1.8082	0.0543482	0.60994		2	2	2	19	19	19	NaN	0	NaN	728390000	24	137	15778	9	0	Q6AYQ1	Q6AYQ1	Golgin subfamily A member 7	Golga7	Golga7	Golgin subfamily A member 7
-0.101227	-1.6405	1.00742	NaN	NaN	NaN	0.450884	NaN	0.283416		2	2	2	NaN	NaN	NaN	NaN	0	NaN	356420000	12	243	26241.9	8	0	Q6AYQ4	Q6AYQ4	Transmembrane protein 109	Tmem109	Tmem109	Transmembrane protein 109
-0.280771	0.590751	1.8525	-1.03374	-0.440234	-0.269329	-1.3515	-0.0555038	0.987837		4	4	4	NaN	NaN	NaN	NaN	0	NaN	1031600000	41	221	24480.4	13	0	Q6AYQ8	Q6AYQ8	Acylpyruvase FAHD1, mitochondrial	Fahd1	Fahd1	Acylpyruvase FAHD1, mitochondrial
-0.0662825	0.05721	0.056703	-1.51342	2.26154	0.206019	-0.50312	0.0372051	-0.535857		10	10	10	NaN	NaN	NaN	NaN	0	NaN	7286500000	106	375	41506.9	15	0	Q6AYR2	Q6AYR2	Protein NDRG3	Ndrg3	Ndrg3	Protein NDRG3
0.694135	1.35866	1.34402	0.39915	-1.40395	-0.920036	-0.666681	-0.647835	-0.157466		5	5	5	34	34	34	NaN	0	NaN	2465600000	113	259	28779.2	11	0	Q6AYR6	Q6AYR6	Haloacid dehalogenase-like hydrolase domain-containing protein 2	Hdhd2	Hdhd2	Haloacid dehalogenase-like hydrolase domain-containing protein 2
NaN	NaN	NaN	NaN	NaN	NaN	-0.707107	NaN	0.707107		2	2	2	NaN	NaN	NaN	NaN	0	NaN	130110000	9	470	52882.2	23	0	Q6AYS6	Q6AYS6	Sorting nexin-17	Snx17	Snx17	Sorting nexin-17
-0.0989733	1.04958	0.0113628	-1.35867	1.68915	-1.43679	-0.0710394	-0.112133	0.327525		12	12	12	38	38	38	NaN	0	NaN	11206000000	250	408	45804.1	24	0	Q6AYS7;Q6PTT0	Q6AYS7	Aminoacylase-1A	Acy1a	Acy1a	Aminoacylase-1A
0.617689	0.28817	0.513206	-1.5107	NaN	-1.70289	0.588871	0.512295	0.693366		8	8	7	NaN	NaN	NaN	NaN	0	NaN	2347800000	69	298	32937.7	16	0	Q6AYS8	Q6AYS8	Estradiol 17-beta-dehydrogenase 11	Hsd17b11	Hsd17b11	Estradiol 17-beta-dehydrogenase 11
0.925942	-0.939233	1.40308	-0.942735	1.06882	-1.11282	0.669036	-0.541561	-0.530521		5	5	5	NaN	NaN	NaN	NaN	0	NaN	653800000	18	329	34975.2	19	0	Q6AYT0	Q6AYT0	Quinone oxidoreductase	Cryz	Cryz	Quinone oxidoreductase
-0.435366	-0.399435	0.21339	-1.53254	0.787108	-0.732898	-0.552275	1.69912	0.952888		16	16	16	NaN	NaN	NaN	NaN	0	NaN	5189700000	139	505	55249.3	24	0	Q6AYT3	Q6AYT3	tRNA-splicing ligase RtcB homolog	Rtcb	Rtcb	tRNA-splicing ligase RtcB homolog
NaN	-0.48311	NaN	NaN	NaN	NaN	NaN	-0.666714	1.14982		4	4	4	10	10	10	NaN	NaN	NaN	95248000	5	439	50183.5	26	0	Q6AYT5	Q6AYT5	Protein-glutamate O-methyltransferase	Armt1	Armt1	Protein-glutamate O-methyltransferase
-0.0866416	0.506398	-0.388938	-2.22276	0.341693	-0.569134	1.21194	0.550255	0.657189		11	11	11	NaN	NaN	NaN	NaN	0	NaN	2262100000	107	398	45295.8	19	0	Q6AYT7	Q6AYT7	Monoacylglycerol lipase ABHD12	Abhd12	Abhd12	Monoacylglycerol lipase ABHD12
0.0306923	0.152034	-1.33876	1.7664	NaN	-0.108296	0.828529	-0.175357	-1.15524		3	3	3	NaN	NaN	NaN	NaN	0	NaN	269750000	24	357	38922.2	14	0	Q6AYU3	Q6AYU3	DnaJ homolog subfamily B member 6	Dnajb6	Dnajb6	DnaJ homolog subfamily B member 6
0.158701	-0.420987	-0.951921	1.59989	-0.266948	1.70494	-0.660211	-0.234589	-0.928871		4	4	4	NaN	NaN	NaN	NaN	0	NaN	1535900000	41	314	35822.4	11	0	Q6AZ50	Q6AZ50	Ubiquitin-like-conjugating enzyme ATG3	Atg3	Atg3	Ubiquitin-like-conjugating enzyme ATG3
0.835763	0.553993	1.62377	-0.396513	-1.45522	0.787815	-0.309593	-0.715697	-0.924321		4	4	4	NaN	NaN	NaN	NaN	0	NaN	1701600000	36	167	19492.4	8	0	Q6BBI8	Q6BBI8	Ubiquitin-fold modifier-conjugating enzyme 1	Ufc1	Ufc1	Ubiquitin-fold modifier-conjugating enzyme 1
0.381717	0.960062	0.786094	0.577407	-2.20198	0.246287	0.431953	-0.284778	-0.896764		13	13	13	NaN	NaN	NaN	NaN	0	NaN	4351500000	114	370	40765.7	21	0	Q6DGG0	Q6DGG0	Peptidyl-prolyl cis-trans isomerase D	Ppid	Ppid	Peptidyl-prolyl cis-trans isomerase D
1.14439	0.657957	1.01225	0.866754	-0.553815	0.244007	-1.26212	-1.4404	-0.669018		7	7	7	NaN	NaN	NaN	NaN	0	NaN	1670200000	46	210	22617.9	12	0	Q6DGG1	Q6DGG1	Alpha/beta hydrolase domain-containing protein 14B	Abhd14b	Abhd14b	Protein ABHD14B
-1.05255	-1.15831	-0.677325	-0.002658	NaN	NaN	1.19731	1.1815	0.512034		2	2	2	NaN	NaN	NaN	NaN	NaN	NaN	195960000	7	395	44983	22	0	Q6EV70	Q6EV70	GDP-fucose protein O-fucosyltransferase 1	Pofut1	Pofut1	GDP-fucose protein O-fucosyltransferase 1
1.60843	0.0970633	-1.01249	-0.694438	1.05788	-1.44674	0.0773574	-0.404355	0.7173		5	5	5	NaN	NaN	NaN	NaN	NaN	NaN	555870000	22	300	34777.8	18	0	Q6F596	Q6F596	Geranylgeranyl pyrophosphate synthase	Ggps1	Ggps1	Geranylgeranyl pyrophosphate synthase
0.54056	-0.258296	-0.8505	0.547464	-1.55007	-0.368511	1.97798	0.269078	-0.307698		7	7	7	NaN	NaN	NaN	NaN	0	NaN	1398300000	40	194	21368.5	13	0	Q6GQP4	Q6GQP4	Ras-related protein Rab-31	Rab31	Rab31	Ras-related protein Rab-31
0.527198	1.03607	0.956234	-0.666033	0.792655	-2.05932	-0.647592	0.0424724	0.0183182		4	4	4	NaN	NaN	NaN	NaN	0	NaN	3631400000	64	297	32002.5	14	0	Q6I7R3	Q6I7R3	Isochorismatase domain-containing protein 1	Isoc1	Isoc1	Isochorismatase domain-containing protein 1
0.839048	0.722365	0.332998	1.16281	NaN	0.365199	-0.741881	-1.47214	-1.2084		6	6	6	NaN	NaN	NaN	NaN	0	NaN	743580000	41	357	39190.7	18	0	Q6IMX7	Q6IMX7	Hsp70-binding protein 1	Hspbp1	Hspbp1	Hsp70-binding protein 1
0.526862	-0.0426892	-0.0771576	-1.53448	0.202006	-1.45112	1.679	0.0739233	0.623658		7	7	7	NaN	NaN	NaN	NaN	0	NaN	928700000	29	391	44077.5	19	0	Q6IRE4	Q6IRE4	Tumor susceptibility gene 101 protein	Tsg101	Tsg101	Tumor susceptibility gene 101 protein
-0.654197	-0.691806	-0.887047	-0.198962	1.75588	1.63601	-0.541437	0.0424225	-0.460864		8	8	8	NaN	NaN	NaN	NaN	0	NaN	1757000000	34	472	52041.5	18	0	Q6IRK9	Q6IRK9	Carboxypeptidase Q	Cpq	Cpq	Carboxypeptidase Q
NaN	0.251784	0.735466	NaN	NaN	-1.72228	0.649756	NaN	0.0852717		2	2	2	NaN	NaN	NaN	NaN	0	NaN	588810000	16	167	18473.3	7	0	Q6JAM9	Q6JAM9	Transmembrane protein 35	Tmem35	Tmem35a	Transmembrane protein 35A
0.373571	-0.276794	-1.34397	1.83206	-1.37327	0.137269	0.795237	0.119837	-0.263932		11	11	11	NaN	NaN	NaN	NaN	0	NaN	22270000000	316	394	42954.6	13	0	Q6JE36	Q6JE36	Protein NDRG1	Ndrg1	Ndrg1	Protein NDRG1
-0.0139561	-0.160353	-1.47546	0.487392	NaN	1.22981	1.38897	-0.897464	-0.558949		10	10	10	NaN	NaN	NaN	NaN	0	NaN	1287000000	25	612	68009.6	36	0	Q6KC51	Q6KC51	Actin-binding LIM protein 2	Ablim2	Ablim2	Actin-binding LIM protein 2
-0.331582	0.265158	0.617145	0.769101	NaN	-1.15401	-1.66965	1.29833	0.205506		4	4	4	NaN	NaN	NaN	NaN	0	NaN	309030000	22	607	68707	30	0	Q6MG06	Q6MG06	Guanine nucleotide-binding protein-like 1	Gnl1	Gnl1	Guanine nucleotide-binding protein-like 1
1.88692	0.133056	-0.949279	0.378476	NaN	NaN	0.139333	-1.01378	-0.574718		3	3	3	NaN	NaN	NaN	NaN	NaN	NaN	364550000	10	421	47326.8	26	0	Q6MG11	Q6MG11	Alpha-tubulin N-acetyltransferase 1	Atat1	Atat1	Alpha-tubulin N-acetyltransferase 1
0.771132	-0.508441	-1.28792	1.1301	-0.518563	0.633887	1.39011	-0.410628	-1.19968		10	10	10	NaN	NaN	NaN	NaN	0	NaN	2399000000	84	1146	120012	32	0	Q6MG49	Q6MG49	Large proline-rich protein BAG6	Bag6	Bag6	Large proline-rich protein BAG6
-0.431158	-0.383766	0.938944	-1.57402	NaN	-1.04207	0.788903	0.578622	1.12454		8	8	8	NaN	NaN	NaN	NaN	0	NaN	1300100000	48	558	63038.1	28	0	Q6MG55	Q6MG55	Abhydrolase domain-containing protein 16A	Abhd16a	Abhd16a	Protein ABHD16A
-0.0996834	-0.625238	-0.492768	1.7923	-1.12322	1.50019	0.141812	-0.463273	-0.630119		8	7	7	NaN	47	47	NaN	0	NaN	2432300000	98	285	29687.9	17	0	Q6MG60	Q6MG60	N(G),N(G)-dimethylarginine dimethylaminohydrolase 2	Ddah2	Ddah2	N(G),N(G)-dimethylarginine dimethylaminohydrolase 2
-1.06871	-0.608223	0.152857	0.816907	1.60748	1.04667	-1.29516	0.0116149	-0.663436		5	5	5	NaN	NaN	NaN	NaN	0	NaN	1187000000	51	241	26980.8	15	0	Q6MG61	Q6MG61	Chloride intracellular channel protein 1	Clic1	Clic1	Chloride intracellular channel protein 1
0.723522	-0.468804	-2.06094	NaN	0.55648	NaN	0.591184	0.071155	0.587401		2	2	2	NaN	NaN	NaN	NaN	NaN	NaN	1993900000	19	798	88050.9	36	0	Q6MGA9	Q6MGA9	Bromodomain-containing protein 2	Brd2	Brd2	Bromodomain-containing protein 2
0.135925	-0.55245	-0.259851	-0.782329	0.606373	2.34074	-0.995737	-0.382599	-0.110076		5	5	5	NaN	NaN	NaN	NaN	0	NaN	1402100000	20	210	24355.2	13	0	Q6NX65	Q6NX65	Programmed cell death protein 10	Pdcd10	Pdcd10	Programmed cell death protein 10
0.647089	0.418567	0.637277	-1.86539	0.780957	-1.50296	0.774395	0.206266	-0.096198		9	9	5	NaN	NaN	NaN	NaN	0	NaN	24076000000	314	205	22677.8	15	0	Q6NYB7	Q6NYB7	Ras-related protein Rab-1A	Rab1A	Rab1A	Ras-related protein Rab-1A
0.866158	0.275967	-1.72805	0.238283	0.481382	-1.602	0.793436	0.824907	-0.150082		16	11	11	NaN	NaN	NaN	NaN	0	NaN	2774500000	73	745	81800.8	46	0	Q6P0K8	Q6P0K8	Junction plakoglobin	Jup	Jup	Junction plakoglobin
0.492016	1.69164	NaN	-0.744144	-1.09141	-1.20726	-0.246165	0.658483	0.446841		3	3	3	NaN	NaN	NaN	NaN	0	NaN	372360000	21	332	38330.1	18	0	Q6P4Z6	Q6P4Z6	Leucine carboxyl methyltransferase 1	Lcmt1	Lcmt1	Leucine carboxyl methyltransferase 1
-0.0915291	-0.0120558	0.329822	0.095808	0.818229	-1.12703	1.91772	-1.40813	-0.522835		5	5	5	NaN	NaN	NaN	NaN	0	NaN	2777000000	86	209	23235.6	8	0	Q6P4Z9	Q6P4Z9	COP9 signalosome complex subunit 8	Cops8	Cops8	COP9 signalosome complex subunit 8
0.400874	0.375633	0.725329	-2.2147	0.118082	-0.386396	-0.731793	1.08154	0.631431		22	22	22	NaN	NaN	NaN	NaN	0	NaN	35355000000	521	545	60647	32	0	Q6P502	Q6P502	T-complex protein 1 subunit gamma	Cct3	Cct3	T-complex protein 1 subunit gamma
0.320279	-0.255214	-1.17625	2.00024	-0.259165	0.999892	-0.192748	-0.324085	-1.11294		4	4	4	NaN	NaN	NaN	NaN	0	NaN	1615100000	45	214	23668.6	12	0	Q6P686	Q6P686	Osteoclast-stimulating factor 1	Ostf1	Ostf1	Osteoclast-stimulating factor 1
0.426995	0.328883	-1.68967	1.06252	NaN	-0.411371	NaN	-0.729428	1.01207		3	3	3	NaN	NaN	NaN	NaN	0	NaN	208960000	9	477	54194.9	26	0	Q6P6Q9	Q6P6Q9	Calcium uptake protein 1, mitochondrial	Micu1	Micu1	Calcium uptake protein 1, mitochondrial
0.0321274	0.147941	0.177911	-1.27411	1.99207	0.522416	-1.43606	-0.0292858	-0.133001		13	13	13	NaN	NaN	NaN	NaN	0	NaN	40564000000	504	509	54038.1	21	0	Q6P6R2	Q6P6R2	Dihydrolipoyl dehydrogenase, mitochondrial	Dld	Dld	Dihydrolipoyl dehydrogenase, mitochondrial
-1.43494	0.100421	NaN	NaN	NaN	NaN	0.809383	0.525135	NaN		4	4	4	NaN	NaN	NaN	NaN	0	NaN	257700000	7	427	47372.8	19	0	Q6P6S9	Q6P6S9	Ectonucleoside triphosphate diphosphohydrolase 5	Entpd5	Entpd5	Ectonucleoside triphosphate diphosphohydrolase 5
0.820043	0.94181	0.575733	0.941047	-0.67636	0.0575999	-2.14663	-0.363763	-0.149476		16	16	16	NaN	NaN	NaN	NaN	0	NaN	11245000000	200	649	70710.7	30	0	Q6P6T4	Q6P6T4	Echinoderm microtubule-associated protein-like 2	Eml2	Eml2	Echinoderm microtubule-associated protein-like 2
1.13468	0.927553	0.904513	-0.540708	1.1446	-0.745035	-1.26372	-0.608139	-0.95375		20	20	20	NaN	NaN	NaN	NaN	0	NaN	97473000000	1042	558	62827	28	0	Q6P6V0;CON__Q3ZBD7	Q6P6V0	Glucose-6-phosphate isomerase	Gpi	Gpi	Glucose-6-phosphate isomerase
NaN	NaN	NaN	NaN	1.64289	-0.909889	0.0811509	-0.666882	-0.147272		5	5	5	NaN	NaN	NaN	NaN	0	NaN	269080000	12	504	55611.3	25	0	Q6P734;CON__P50448	Q6P734	Plasma protease C1 inhibitor	Serping1	Serping1	Plasma protease C1 inhibitor
-0.580981	-1.10759	NaN	NaN	NaN	NaN	1.30719	0.762635	-0.381247		3	3	3	NaN	NaN	NaN	NaN	0	NaN	359960000	15	263	28404.8	14	0	Q6P756	Q6P756	Adaptin ear-binding coat-associated protein 2	Necap2	Necap2	Adaptin ear-binding coat-associated protein 2
-0.292165	-0.503198	-0.773919	1.09285	1.35628	0.963714	0.290299	-0.459084	-1.67478		5	5	5	NaN	NaN	NaN	NaN	0	NaN	945620000	45	161	17720.8	9	0	Q6P791	Q6P791	Ragulator complex protein LAMTOR1	Lamtor1	Lamtor1	Ragulator complex protein LAMTOR1
0.241653	1.02567	0.736744	-1.57335	0.130922	-1.50784	-0.528777	1.06405	0.41093		18	18	18	NaN	NaN	NaN	NaN	0	NaN	11180000000	306	512	58587.9	26	0	Q6P799	Q6P799	Serine--tRNA ligase, cytoplasmic	Sars	Sars	Serine--tRNA ligase, cytoplasmic
-1.05327	-0.0324452	0.86114	-1.59649	NaN	-0.54477	0.307395	1.24059	0.817858		8	8	8	10	10	10	NaN	0	NaN	1061400000	24	1066	122379	49	0	Q6P7A2	Q6P7A2	Ubiquitin conjugation factor E4 A	Ube4a	Ube4a	Ubiquitin conjugation factor E4 A
-0.847069	-0.0588223	0.87414	-0.949765	1.15445	-1.65178	-0.175657	1.10307	0.55143		11	11	11	NaN	NaN	NaN	NaN	0	NaN	1513500000	59	953	106207	35	0	Q6P7A9	Q6P7A9	Lysosomal alpha-glucosidase	Gaa	Gaa	Lysosomal alpha-glucosidase
0.132039	1.05184	1.4358	-1.23307	0.435017	-1.50465	-0.692547	0.569139	-0.193572		19	19	19	NaN	NaN	NaN	NaN	0	NaN	17487000000	397	481	54143.6	27	0	Q6P7B0	Q6P7B0	Tryptophan--tRNA ligase, cytoplasmic;T1-TrpRS;T2-TrpRS	Wars	Wars	Tryptophan--tRNA ligase, cytoplasmic
0.544012	0.218152	0.938546	-2.03527	NaN	0.310261	-0.909696	0.836658	0.0973329		5	5	5	NaN	NaN	NaN	NaN	NaN	NaN	663700000	23	419	48043.2	25	0	Q6P7P5;Q9WTT7	Q6P7P5	Basic leucine zipper and W2 domain-containing protein 1	Bzw1	Bzw1	Basic leucine zipper and W2 domain-containing protein 1
-0.707107	NaN	NaN	NaN	NaN	NaN	NaN	0.707107	NaN		2	2	2	NaN	NaN	NaN	NaN	NaN	NaN	122630000	7	383	43558.7	18	0	Q6P7Q1	Q6P7Q1	BRCA1-A complex subunit BRE	Bre	Bre	BRCA1-A complex subunit BRE
0.12831	-0.241084	-0.104668	2.23644	-0.162882	0.622999	-0.28127	-1.14222	-1.05562		10	10	10	NaN	NaN	NaN	NaN	0	NaN	20848000000	257	184	20819.6	11	0	Q6P7Q4	Q6P7Q4	Lactoylglutathione lyase	Glo1	Glo1	Lactoylglutathione lyase
0.243933	0.253453	0.203751	-2.24853	0.247011	-0.949651	0.683287	1.0301	0.536646		7	7	7	NaN	NaN	NaN	NaN	0	NaN	3915400000	90	312	34840.9	16	0	Q6P7R8	Q6P7R8	Very-long-chain 3-oxoacyl-CoA reductase	Hsd17b12	Hsd17b12	Very-long-chain 3-oxoacyl-CoA reductase
0.0601512	-1.18822	-0.00220411	-0.339082	1.59103	-1.74642	0.49547	0.615112	0.514159		8	8	8	NaN	NaN	NaN	NaN	0	NaN	2171500000	84	394	44443.2	24	0	Q6P7S1	Q6P7S1	Acid ceramidase	Asah1	Asah1	Acid ceramidase
-0.584045	0.368165	-0.368833	-1.66318	1.01435	-0.614977	-0.0278771	1.7905	0.0858906		28	28	5	NaN	NaN	NaN	NaN	0	NaN	721360000000	5747	445	49801	20	0	Q6P9T8	Q6P9T8	Tubulin beta-4B chain	Tubb4b	Tubb4b	Tubulin beta-4B chain
0.0195174	0.172438	-0.635884	1.92684	-1.56355	0.584425	0.630586	-0.68017	-0.454211		5	5	5	NaN	NaN	NaN	NaN	0	NaN	607920000	33	195	21931.8	9	0	Q6P9U3	Q6P9U3	COMM domain-containing protein 3	Commd3	Commd3	COMM domain-containing protein 3
-1.04372	0.0619379	NaN	NaN	NaN	NaN	-0.931631	0.633987	1.27943		5	5	5	NaN	NaN	NaN	NaN	0	NaN	848170000	12	352	39905.3	20	0	Q6P9U8	Q6P9U8	Eukaryotic translation initiation factor 3 subunit H	Eif3h	Eif3h	Eukaryotic translation initiation factor 3 subunit H
-0.940458	-0.00910613	-0.47227	-1.53368	1.26315	-0.283108	-0.233925	1.5343	0.675091		27	27	0	NaN	NaN	0	NaN	0	NaN	621270000000	3136	451	50151.6	21	0	Q6P9V9	Q6P9V9	Tubulin alpha-1B chain	Tuba1b	Tuba1b	Tubulin alpha-1B chain
-0.239034	0.251779	-1.71684	NaN	NaN	NaN	0.158685	0.175784	1.36962		3	3	3	NaN	NaN	NaN	NaN	NaN	NaN	586620000	12	170	19471.1	9.5	0	Q6P9X4;Q78EG7	Q6P9X4;Q78EG7	Protein tyrosine phosphatase type IVA 2;Protein tyrosine phosphatase type IVA 1	Ptp4a2;Ptp4a1	Ptp4a2;Ptp4a1	Protein tyrosine phosphatase type IVA 2;Protein tyrosine phosphatase type IVA 1
-0.126229	-0.329191	-0.86061	1.35994	-1.49733	0.12419	1.55323	0.431396	-0.655398		7	7	7	NaN	NaN	NaN	NaN	0	NaN	2288000000	33	220	23991.8	13	0	Q6PCT3	Q6PCT3	Tumor protein D54	Tpd52l2	Tpd52l2	Tumor protein D54
0.251746	0.480702	1.00741	-1.56329	-1.0743	0.480831	-1.20572	0.597689	1.02493		8	8	8	NaN	NaN	NaN	NaN	0	NaN	19332000000	344	226	26128.4	13	0	Q6PCU2	Q6PCU2	V-type proton ATPase subunit E 1	Atp6v1e1	Atp6v1e1	V-type proton ATPase subunit E 1
-1.16698	-1.00734	0.543921	NaN	NaN	NaN	1.52212	0.00484193	0.103447		3	3	3	19	19	19	NaN	0	NaN	574330000	10	221	25476.4	9	0	Q6PDU1	Q6PDU1	Serine/arginine-rich splicing factor 2	Srsf2	Srsf2	Serine/arginine-rich splicing factor 2
-0.372036	0.30736	1.54934	-1.95867	0.555836	-0.702466	-0.399696	0.355974	0.664362		7	7	7	NaN	NaN	NaN	NaN	0	NaN	12058000000	203	103	11433.5	6	0	Q6PDU7	Q6PDU7	ATP synthase subunit g, mitochondrial	Atp5l	Atp5l	ATP synthase subunit g, mitochondrial
0.233564	0.39493	1.25129	-0.754516	0.742579	0.640107	-2.10337	-0.508296	0.103716		7	7	7	NaN	NaN	NaN	NaN	0	NaN	2457000000	49	147	16929.3	10	0	Q6PEC0	Q6PEC0	Bis(5-nucleosyl)-tetraphosphatase [asymmetrical]	Nudt2	Nudt2	Bis(5'-nucleosyl)-tetraphosphatase [asymmetrical]
0.125489	-0.494788	-0.992675	1.93884	-0.338251	1.15715	0.280157	-1.00924	-0.666683		8	8	8	NaN	NaN	NaN	NaN	0	NaN	11566000000	377	163	18672	10	0	Q6PEC4	Q6PEC4	S-phase kinase-associated protein 1	Skp1	Skp1	S-phase kinase-associated protein 1
-0.0963788	0.424089	0.635509	-2.2034	0.96025	-0.422255	-0.680737	0.564918	0.818		12	12	11	26	26	NaN	NaN	0	NaN	6671900000	158	558	63375.3	30	0	Q6PST4	Q6PST4	Atlastin-1	Atl1	Atl1	Atlastin-1
0.156277	1.34407	1.57668	-1.00675	0.143361	-1.57024	-0.330264	-0.0441916	-0.268949		21	21	21	NaN	NaN	NaN	NaN	0	NaN	13325000000	283	475	52693.1	25	0	Q6Q0N1	Q6Q0N1	Cytosolic non-specific dipeptidase	Cndp2	Cndp2	Cytosolic non-specific dipeptidase
-0.277372	-1.21997	1.5391	0.247759	1.40435	-0.758641	0.0944636	0.162552	-1.19225		8	6	6	NaN	NaN	NaN	NaN	0	NaN	2443000000	55	796	90890.8	46	0	Q6Q629	Q6Q629	Inactive dipeptidyl peptidase 10	Dpp10	Dpp10	Inactive dipeptidyl peptidase 10
0.289858	0.830158	1.07595	-0.625352	-1.83082	-0.897776	-0.404388	0.520278	1.04209		12	12	12	NaN	NaN	NaN	NaN	0	NaN	4811000000	137	377	44011.6	25	0	Q6Q7Y5	Q6Q7Y5	Guanine nucleotide-binding protein subunit alpha-13	Gna13	Gna13	Guanine nucleotide-binding protein subunit alpha-13
0.327111	1.02041	NaN	-1.13886	NaN	-1.67565	0.604037	0.361563	0.501381		3	3	3	NaN	NaN	NaN	NaN	0	NaN	136570000	24	351	39103.7	17	0	Q6QA69	Q6QA69	1-acylglycerol-3-phosphate O-acyltransferase ABHD5	Abhd5	Abhd5	1-acylglycerol-3-phosphate O-acyltransferase ABHD5
-0.266651	0.17729	0.0196101	-1.97914	NaN	NaN	1.19855	0.726832	0.12351		4	4	4	NaN	NaN	NaN	NaN	0	NaN	842080000	30	296	31646.5	10	0	Q6QBQ4	Q6QBQ4	Phospholipid scramblase 3	Plscr3	Plscr3	Phospholipid scramblase 3
0.996507	-1.95705	0.356871	0.0661856	NaN	NaN	0.924299	0.047486	-0.4343		3	3	3	NaN	NaN	NaN	NaN	NaN	NaN	153160000	8	970	111258	48	0	Q6QI44	Q6QI44	N-alpha-acetyltransferase 25, NatB auxiliary subunit	Naa25	Naa25	N-alpha-acetyltransferase 25, NatB auxiliary subunit
0.368105	0.239059	1.22862	-1.39019	-0.428278	-1.12396	-0.825262	1.39682	0.535091		6	6	6	NaN	NaN	NaN	NaN	0	NaN	1447700000	48	388	41898.4	15	0	Q6QIX3	Q6QIX3	Zinc transporter 3	Slc30a3	Slc30a3	Zinc transporter 3
0.408771	0.277995	-0.932723	0.500323	1.94358	-0.879682	0.49002	-0.580912	-1.22737		15	14	12	20	NaN	NaN	NaN	0	NaN	4469500000	178	1027	116916	58	0	Q6QLM7	Q6QLM7	Kinesin heavy chain isoform 5A	Kif5a	Kif5a	Kinesin heavy chain isoform 5A
0.696425	-0.55129	-0.267948	0.236778	1.60125	-1.37566	0.998002	-1.27551	-0.062042		6	6	6	NaN	NaN	NaN	NaN	0	NaN	36519000000	287	940	101517	39	0	Q6RJR6	Q6RJR6	Reticulon-3	Rtn3	Rtn3	Reticulon-3
1.33125	0.610927	0.432381	-0.4223	-2.14126	-0.27508	-0.321871	-0.063153	0.849109		4	4	4	NaN	NaN	NaN	NaN	0	NaN	20289000000	145	192	21450.1	8	0	Q6RUV5	Q6RUV5	Ras-related C3 botulinum toxin substrate 1	Rac1	Rac1	Ras-related C3 botulinum toxin substrate 1
0.311308	NaN	0.284277	-1.15161	0.479948	NaN	-0.385782	-1.18509	1.64695		5	3	3	NaN	NaN	NaN	NaN	NaN	NaN	247240000	7	1067	119550	49	0	Q6RVG2	Q6RVG2	Electroneutral sodium bicarbonate exchanger 1	Slc4a8	Slc4a8	Electroneutral sodium bicarbonate exchanger 1
0.236863	-0.00284155	-0.0471615	-0.251327	-2.09059	-0.661146	0.589859	0.763463	1.46288		5	5	5	NaN	NaN	NaN	NaN	0	NaN	1715800000	64	358	40495	16	0	Q6TUG0	Q6TUG0	DnaJ homolog subfamily B member 11	Dnajb11	Dnajb11	DnaJ homolog subfamily B member 11
0.329558	-0.807722	-0.607965	NaN	NaN	-0.978721	1.84096	-0.38669	0.610584		3	3	3	NaN	NaN	NaN	NaN	0	NaN	159580000	10	599	66388.5	35	0	Q6UPE0	Q6UPE0	Choline dehydrogenase, mitochondrial	Chdh	Chdh	Choline dehydrogenase, mitochondrial
0.984532	0.452118	-0.915967	0.511008	-1.00172	-1.61236	0.635254	-0.323604	1.27073		11	11	11	NaN	NaN	NaN	NaN	0	NaN	4714100000	141	616	68198.1	33	0	Q6UPE1	Q6UPE1	Electron transfer flavoprotein-ubiquinone oxidoreductase, mitochondrial	Etfdh	Etfdh	Electron transfer flavoprotein-ubiquinone oxidoreductase, mitochondrial
-0.135113	-1.10297	-0.430827	-0.721169	NaN	-0.973243	0.844998	0.922024	1.5963		7	7	7	NaN	NaN	NaN	NaN	0	NaN	1340000000	29	898	99896.8	33	0	Q6UPR8	Q6UPR8	Endoplasmic reticulum metallopeptidase 1	Ermp1	Ermp1	Endoplasmic reticulum metallopeptidase 1
-1.18548	-0.941597	0.327947	-1.04411	-0.122133	1.75802	0.349435	-0.247297	1.10521		9	9	9	NaN	NaN	NaN	NaN	0	NaN	1578200000	64	379	39652	19	0	Q6URK4	Q6URK4	Heterogeneous nuclear ribonucleoprotein A3	Hnrnpa3	Hnrnpa3	Heterogeneous nuclear ribonucleoprotein A3
-0.448961	-1.11414	-0.0903422	2.12688	NaN	0.46404	-0.897461	0.0233749	-0.0633942		4	4	4	NaN	NaN	NaN	NaN	0	NaN	963740000	23	318	35148.2	9	0	Q6VBQ5	Q6VBQ5	Myeloid-associated differentiation marker	Myadm	Myadm	Myeloid-associated differentiation marker
NaN	NaN	NaN	-0.336622	NaN	NaN	-0.763855	1.47157	-0.371088		2	1	1	NaN	NaN	NaN	NaN	0	NaN	1568700000	18	121	14272.5	4	0	Q6XVN8	Q6XVN8	Microtubule-associated proteins 1A/1B light chain 3A	Map1lc3a	Map1lc3a	Microtubule-associated proteins 1A/1B light chain 3A
-1.81624	0.597989	0.187822	NaN	NaN	NaN	0.948816	0.490711	-0.409099		5	5	5	NaN	NaN	NaN	NaN	0	NaN	712360000	22	752	82557.8	34	0	Q704E8	Q704E8	ATP-binding cassette sub-family B member 7, mitochondrial	Abcb7	Abcb7	ATP-binding cassette sub-family B member 7, mitochondrial
0.240692	0.174274	1.49291	-0.770834	NaN	-0.76698	-1.42876	-0.140982	1.19968		11	11	11	20	20	20	NaN	0	NaN	1813600000	50	626	70800.7	26	0	Q704S8	Q704S8	Carnitine O-acetyltransferase	Crat	Crat	Carnitine O-acetyltransferase
-0.079743	0.420387	1.17628	-1.69746	1.43317	-1.22084	-0.0559387	0.0571083	-0.0329617		8	8	8	NaN	NaN	NaN	NaN	0	NaN	2800300000	81	249	28004.3	11	0	Q711G3	Q711G3	Isoamyl acetate-hydrolyzing esterase 1 homolog	Iah1	Iah1	Isoamyl acetate-hydrolyzing esterase 1 homolog
-0.853084	-0.931091	-1.38734	1.32728	0.483697	1.56343	-0.000463003	-0.000821531	-0.20161		5	5	5	NaN	NaN	NaN	NaN	0	NaN	529740000	14	425	47820.1	16	0	Q71UF4	Q71UF4	Histone-binding protein RBBP7	Rbbp7	Rbbp7	Histone-binding protein RBBP7
0.261235	0.408917	1.33018	-2.28666	-0.454047	0.12455	-0.320159	0.422433	0.513552		13	13	13	31	31	31	NaN	0	NaN	11920000000	300	610	67445	31	0	Q75Q39	Q75Q39	Mitochondrial import receptor subunit TOM70	Tomm70a	Tomm70	Mitochondrial import receptor subunit TOM70
-0.256701	-1.65007	1.10289	NaN	0.592839	NaN	-0.855797	0.119861	0.946981		5	5	5	NaN	NaN	NaN	NaN	0	NaN	1331000000	35	361	37919.2	11	0	Q75Q40	Q75Q40	Mitochondrial import receptor subunit TOM40 homolog	Tomm40	Tomm40	Mitochondrial import receptor subunit TOM40 homolog
-0.976272	0.503544	1.53153	-0.981522	-0.859118	-0.843715	0.12229	1.41856	0.0847072		4	4	4	NaN	NaN	NaN	NaN	0	NaN	774880000	89	142	15490.6	7	0	Q75Q41	Q75Q41	Mitochondrial import receptor subunit TOM22 homolog	Tomm22	Tomm22	Mitochondrial import receptor subunit TOM22 homolog
0.362424	-0.0122868	-0.759553	-0.290534	2.49935	-0.713353	-0.42071	-0.169569	-0.49577		9	9	8	NaN	NaN	NaN	NaN	0	NaN	1258400000	44	822	91482.5	43	0	Q75WE7	Q75WE7	von Willebrand factor A domain-containing protein 5A	Vwa5a	Vwa5a	von Willebrand factor A domain-containing protein 5A
NaN	-0.707107	NaN	NaN	NaN	0.707107	NaN	NaN	NaN		2	2	2	NaN	NaN	NaN	NaN	NaN	NaN	732150000	5	396	45722.7	22	0	Q769K2	Q769K2	N-acyl-phosphatidylethanolamine-hydrolyzing phospholipase D	Napepld	Napepld	N-acyl-phosphatidylethanolamine-hydrolyzing phospholipase D
-0.140287	NaN	NaN	NaN	NaN	NaN	NaN	-0.922449	1.06274		2	2	2	NaN	NaN	NaN	NaN	NaN	NaN	278640000	13	1194	129018	53	0	Q76M68	Q76M68	IQ motif and SEC7 domain-containing protein 3	Iqsec3	Iqsec3	IQ motif and SEC7 domain-containing protein 3
1.18867	0.647007	0.736724	-0.168882	-2.27402	-0.0495602	0.481857	-0.410438	-0.151354		4	4	2	NaN	NaN	NaN	NaN	0	NaN	46502000000	452	89	10349.8	5	0	Q78P75	Q78P75	Dynein light chain 2, cytoplasmic	Dynll2	Dynll2	Dynein light chain 2, cytoplasmic
1.3464	0.277981	-0.0725983	-0.94059	-0.148175	-1.43476	1.66757	-0.589363	-0.106462		12	12	11	NaN	NaN	NaN	NaN	0	NaN	3606600000	99	437	48906.9	26	0	Q793F9	Q793F9	Vacuolar protein sorting-associated protein 4A	Vps4a	Vps4a	Vacuolar protein sorting-associated protein 4A
-0.229595	-0.516456	-0.978397	1.55918	-0.11087	1.25553	0.931499	-1.02678	-0.884103		13	13	13	NaN	NaN	NaN	NaN	0	NaN	25861000000	470	527	58072.2	24	0	Q794F9	Q794F9	4F2 cell-surface antigen heavy chain	Slc3a2	Slc3a2	4F2 cell-surface antigen heavy chain
1.37328	1.09799	0.132125	0.346505	-1.56479	-1.42087	0.450623	-0.122556	-0.292307		6	6	6	NaN	NaN	NaN	NaN	0	NaN	9082500000	160	165	18533.6	11	0	Q7M0E3	Q7M0E3	Destrin	Dstn	Dstn	Destrin
0.389865	-0.258406	-1.17103	1.58147	NaN	0.674597	0.575537	-1.40438	-0.387645		2	2	2	NaN	NaN	NaN	NaN	NaN	NaN	2162500000	35	228	25247.3	10	0	Q7M730	Q7M730	Sodium channel subunit beta-4	Scn4b	Scn4b	Sodium channel subunit beta-4
-0.000551189	0.65506	0.189353	-0.173572	2.23514	-0.87469	-0.475115	-1.1704	-0.385227		4	4	4	NaN	NaN	NaN	NaN	0	NaN	5121100000	99	145	16352.7	10	0	Q7M767	Q7M767	Ubiquitin-conjugating enzyme E2 variant 2	Ube2v2	Ube2v2	Ubiquitin-conjugating enzyme E2 variant 2
-0.489419	0.261406	0.823611	-1.35418	1.06444	-1.71328	-0.0655403	0.630444	0.842523		11	11	11	NaN	NaN	NaN	NaN	0	NaN	8473800000	47	4743	536024	252	0	Q7TMA5	Q7TMA5	Apolipoprotein B-100;Apolipoprotein B-48	Apob	Apob	Apolipoprotein B-100
-0.844094	-0.484841	-0.0352384	-0.415226	-1.263	-0.603487	1.08608	1.76133	0.798473		4	4	4	NaN	NaN	NaN	NaN	0	NaN	268120000	32	526	60479.2	21	0	Q7TNY6	Q7TNY6	Golgi resident protein GCP60	Acbd3	Acbd3	Golgi resident protein GCP60
0.427787	-0.406623	-1.11713	1.85894	NaN	0.903143	-0.394518	-0.92582	-0.345778		6	6	6	NaN	NaN	NaN	NaN	0	NaN	463090000	22	1423	157989	80	0	Q7TP36	Q7TP36	Protein Shroom2	Shroom2	Shroom2	Protein Shroom2
-1.41471	NaN	NaN	NaN	-0.380944	NaN	0.0580541	1.2814	0.456197		6	6	6	12	12	12	NaN	0	NaN	1189700000	9	533	59710.5	28	0	Q7TP47	Q7TP47	Heterogeneous nuclear ribonucleoprotein Q	Syncrip	Syncrip	Heterogeneous nuclear ribonucleoprotein Q
0.788373	-0.0119448	0.427837	-2.38125	0.494178	-0.748751	0.474977	0.342384	0.614201		6	6	6	NaN	NaN	NaN	NaN	0	NaN	926460000	37	376	42062.4	20	0	Q7TP48	Q7TP48	Adipocyte plasma membrane-associated protein	Apmap	Apmap	Adipocyte plasma membrane-associated protein
1.2215	1.44845	0.862787	0.0996334	-0.517739	-1.26473	-1.24957	-0.452468	-0.147854		5	5	5	NaN	NaN	NaN	NaN	0	NaN	1537500000	64	245	27902.9	15	0	Q7TP52	Q7TP52	Carboxymethylenebutenolidase homolog	Cmbl	Cmbl	Carboxymethylenebutenolidase homolog
1.08068	NaN	-1.1335	NaN	NaN	NaN	1.0245	-0.599025	-0.372658		4	4	4	NaN	NaN	NaN	NaN	0	NaN	405920000	8	746.5	82728.7	39	0	Q7TP54;P02793	Q7TP54;P02793	Protein FAM65B;Ferritin light chain 1	Fam65b;Ftl1	Fam65b;Ftl1	Protein FAM65B;Ferritin light chain 1
-1.70368	0.524436	1.075	0.671201	NaN	NaN	-0.774908	-0.441089	0.649047		5	5	5	NaN	NaN	NaN	NaN	0	NaN	630410000	19	463	51381.1	20	0	Q7TP98	Q7TP98	Interleukin enhancer-binding factor 2	Ilf2	Ilf2	Interleukin enhancer-binding factor 2
-0.146787	0.650389	0.777639	-1.72448	1.31318	-1.28478	-0.463743	0.459278	0.419295		21	21	21	NaN	NaN	NaN	NaN	0	NaN	18739000000	386	539	58099.4	33	0	Q7TPB1	Q7TPB1	T-complex protein 1 subunit delta	Cct4	Cct4	T-complex protein 1 subunit delta
-0.116774	-0.646939	-0.714879	2.25659	NaN	0.369334	0.0657836	-0.816339	-0.396778		2	2	2	6	6	6	NaN	NaN	NaN	1282400000	17	319	35629.2	14	0	Q7TPJ0	Q7TPJ0	Translocon-associated protein subunit alpha	Ssr1	Ssr1	Translocon-associated protein subunit alpha
-0.0209429	0.768116	0.773334	-0.26019	-1.7615	1.30254	0.0529493	-1.31502	0.46071		4	4	4	NaN	NaN	NaN	NaN	0	NaN	6651200000	111	82	9849.36	5	0	Q7TQ16	Q7TQ16	Cytochrome b-c1 complex subunit 8	Uqcrq	Uqcrq	Cytochrome b-c1 complex subunit 8
0.950682	0.846009	1.13385	-0.801814	NaN	-0.887737	-1.58797	-0.0290387	0.376012		4	4	4	NaN	NaN	NaN	NaN	0	NaN	549710000	38	292	32090.7	18	0	Q7TQ94	Q7TQ94	Nitrilase homolog 1	Nit1	Nit1	Nitrilase homolog 1
1.54666	0.549142	0.631502	-0.721742	-1.4567	-1.34628	0.375269	-0.122253	0.544403		3	3	3	NaN	NaN	NaN	NaN	0	NaN	1222100000	38	622	69153.1	23	0	Q7TSA0	Q7TSA0	Mitochondrial Rho GTPase 2	Rhot2	Rhot2	Mitochondrial Rho GTPase 2
-0.819388	-0.249558	1.40105	0.832448	NaN	-1.69451	-0.251817	0.821037	-0.0392639		8	8	4	NaN	NaN	NaN	NaN	0	NaN	666690000	28	1791	201974	99	0	Q7TSU1	Q7TSU1	Brefeldin A-inhibited guanine nucleotide-exchange protein 2	Arfgef2	Arfgef2	Brefeldin A-inhibited guanine nucleotide-exchange protein 2
0.952808	0.359807	0.824242	-0.445698	0.252689	-2.1428	-0.804542	0.128632	0.874864		24	24	24	NaN	NaN	NaN	NaN	0	NaN	5864500000	116	1071	123039	53	0	Q80U96	Q80U96	Exportin-1	Xpo1	Xpo1	Exportin-1
-1.25218	1.19603	NaN	NaN	NaN	NaN	0.0275208	NaN	0.0286277		3	3	3	NaN	NaN	NaN	NaN	NaN	NaN	321490000	6	672	76269.1	35	0	Q80VJ4	Q80VJ4	Glycerophosphocholine phosphodiesterase GPCPD1	Gpcpd1	Gpcpd1	Glycerophosphocholine phosphodiesterase GPCPD1
0.497982	0.527593	0.540095	-1.78627	-0.510374	-1.30693	0.238784	0.482896	1.31622		7	7	7	NaN	NaN	NaN	NaN	0	NaN	1514000000	34	497	57326.1	23	0	Q80W83	Q80W83		LOC100909468	Ppp2r5b	Serine/threonine-protein phosphatase 2A 56 kDa regulatory subunit beta isoform
0.351873	0.16128	1.50397	-1.64811	-0.554917	-1.12796	-0.252221	0.813205	0.752887		6	6	6	NaN	NaN	NaN	NaN	0	NaN	3822900000	89	141	14854.1	5	0	Q80W89	Q80W89	NADH dehydrogenase [ubiquinone] 1 alpha subcomplex subunit 11	Ndufa11	Ndufa11	NADH dehydrogenase [ubiquinone] 1 alpha subcomplex subunit 11
0.391255	0.329085	1.02567	-2.20153	0.623135	-0.957973	-0.178666	0.611888	0.357142		13	13	13	NaN	NaN	NaN	NaN	0	NaN	2263400000	141	783	88067.7	39	0	Q80W92	Q80W92	Protein VAC14 homolog	Vac14	Vac14	Protein VAC14 homolog
0.488963	-0.524032	-0.653139	1.57488	NaN	0.0308297	1.1516	-1.27092	-0.798184		5	5	5	NaN	NaN	NaN	NaN	0	NaN	1044500000	38	304	33487.5	12	0	Q80W98	Q80W98	Small glutamine-rich tetratricopeptide repeat-containing protein beta	Sgtb	Sgtb	Small glutamine-rich tetratricopeptide repeat-containing protein beta
-0.22829	-0.611016	-1.23501	0.239279	NaN	2.21592	-0.271323	-0.087528	-0.022029		5	5	5	15	15	15	NaN	0	NaN	897490000	30	474	48443.9	20	0	Q80WA4	Q80WA4	RNA-binding protein Nova-1	Nova1	Nova1	RNA-binding protein Nova-1
0.542754	0.696976	-0.339904	-0.602045	NaN	-1.26681	1.68045	-1.08368	0.372265		3	3	3	NaN	NaN	NaN	NaN	0	NaN	1146300000	37	440	46990.3	19	0	Q80XF7	Q80XF7	Gap junction gamma-2 protein	Gjc2	Gjc2	Gap junction gamma-2 protein
0.63426	0.830566	1.13782	-1.92314	0.495784	-0.885092	-0.84889	0.346087	0.212607		14	14	14	NaN	NaN	NaN	NaN	0	NaN	1883800000	52	491	55437.9	29	0	Q80Z29	Q80Z29	Nicotinamide phosphoribosyltransferase	Nampt	Nampt	Nicotinamide phosphoribosyltransferase
-0.345079	0.666735	1.541	0.111585	-1.74144	0.392088	-1.25353	0.0975562	0.531081		4	4	4	NaN	NaN	NaN	NaN	0	NaN	1118900000	34	750	83438.9	31	0	Q80Z30	Q80Z30	Protein phosphatase 1E	Ppm1e	Ppm1e	Protein phosphatase 1E
-0.707107	NaN	NaN	NaN	NaN	NaN	NaN	NaN	0.707107		3	3	3	NaN	NaN	NaN	NaN	0	NaN	276920000	5	794	88682.9	38	0	Q80Z70	Q80Z70	Protein sel-1 homolog 1	Sel1l	Sel1l	Protein sel-1 homolog 1
0.153775	-0.476232	2.06483	-0.843211	-1.3198	0.321513	-0.543298	-0.141546	0.783969		5	4	3	NaN	NaN	NaN	NaN	0	NaN	605200000	20	1117	125639	50	0	Q80ZA5	Q80ZA5	Sodium-driven chloride bicarbonate exchanger	Slc4a10	Slc4a10	Sodium-driven chloride bicarbonate exchanger
-0.472142	0.388984	1.01538	1.33471	NaN	-1.90526	0.152639	-0.139345	-0.374955		6	6	6	NaN	NaN	NaN	NaN	0	NaN	360880000	16	529	59833	30	0	Q80ZG1	Q80ZG1	Synembryn-A	Ric8a	Ric8a	Synembryn-A
0.983514	1.0955	1.62973	-0.590235	-0.360048	-1.35056	-0.767216	-0.119535	-0.521157		9	9	9	NaN	NaN	NaN	NaN	0	NaN	1265300000	36	319	35341	15	0	Q811X6	Q811X6	Lambda-crystallin homolog	Cryl1	Cryl1	Lambda-crystallin homolog
-0.104943	-1.2747	1.14392	NaN	NaN	NaN	0.235724	NaN	NaN		3	3	3	NaN	NaN	NaN	NaN	0	NaN	128850000	12	528	59638.8	27	0	Q812D1	Q812D1	PC4 and SFRS1-interacting protein	Psip1	Psip1	PC4 and SFRS1-interacting protein
[truncated: 255 more rows]
